# Supplementary material for: Quantitative trait and transcriptome analysis of genetic complexity underpinning cardiac interatrial septation in mice using an advanced intercross line
Source: eLife journal article supplement (doi:10.7554/elife.83606), 2023-06-05

Figure 7F with uncropped blots

IP FLAG-SMAD6  
WB Ubiquitin

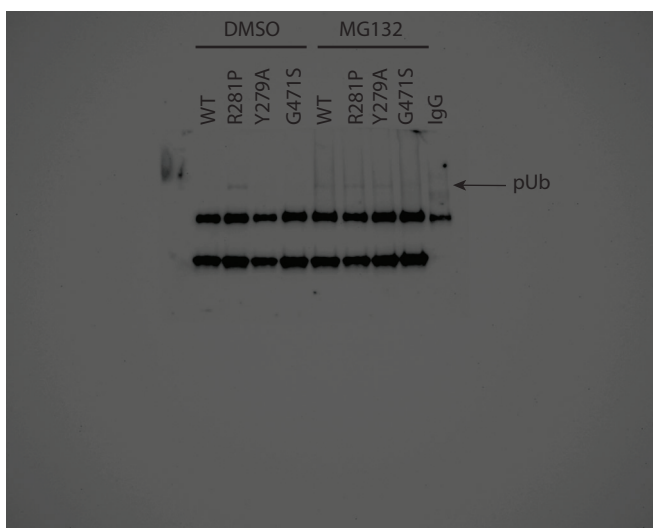

Input  
WB Ubiquitin

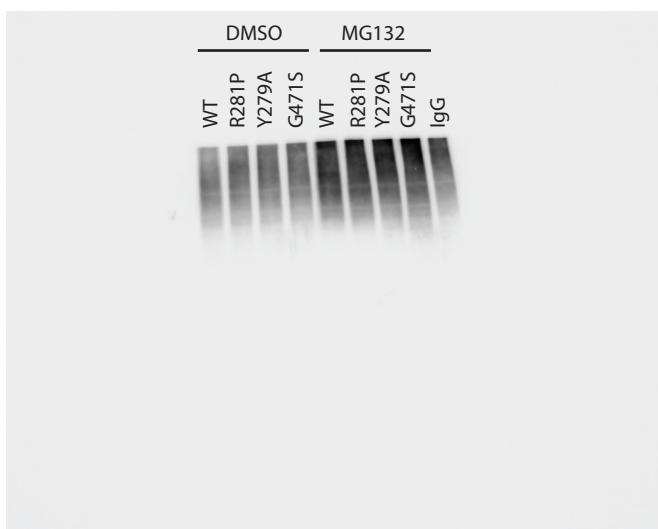

Input  
WB FLAG

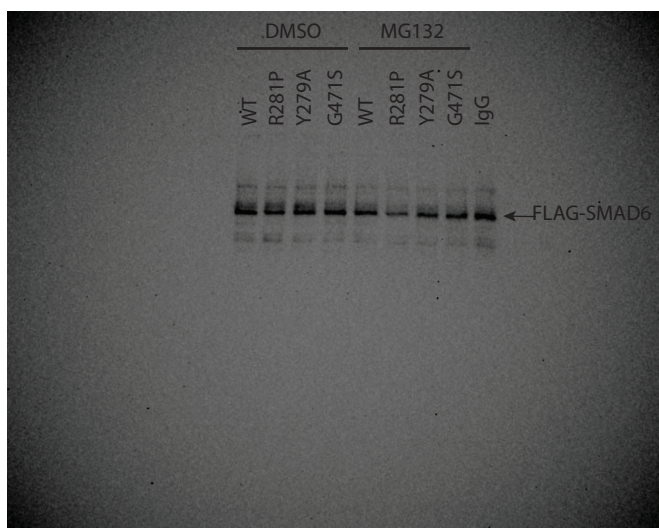

Input  
Total protein

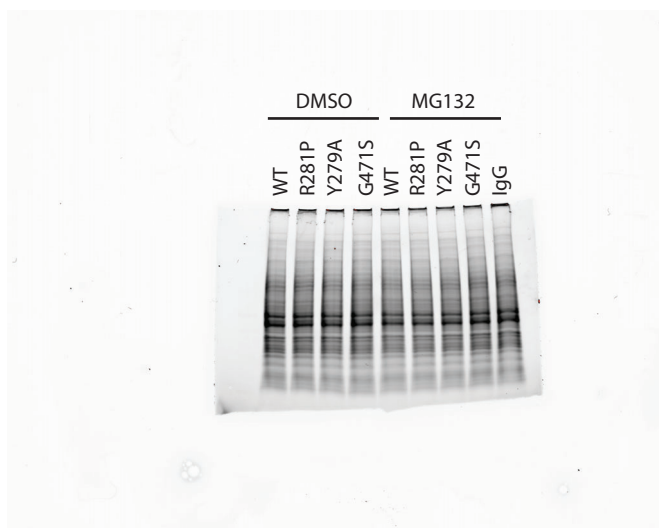

Supplement: fig7-data1 [file elife-83606-fig7-data1-v2.zip]
