# Supplementary material for: Quantitative trait and transcriptome analysis of genetic complexity underpinning cardiac interatrial septation in mice using an advanced intercross line
Source: eLife. 2023 Jun 5;12:e83606. doi: 10.7554/eLife.83606 (PMC10284603; doi:10.7554/eLife.83606)
Supplement: Supplementary file 1. [file elife-83606-supp1.xlsx]

## Sheet: 0
Supplementary File 1. Relationship between PFO and the quantitative traits in F14 mice with complete data (n = 933).
	PFO	Number of Mice	Mean (mm)	Std. Error	t-test P-value*
FVL	Present	314	0.9	0.138	<0.001
	Absent	619	1.07	0.098
FOW	Present	314	0.29	0.138	<0.001
	Absent	619	0.21	0.098
CRW	Present	314	0.56	0.138	0.069
	Absent	619	0.54	0.098
*t-test compares mean of each trait between mice with and without PFO.
