# Supplementary material for: Quantitative trait and transcriptome analysis of genetic complexity underpinning cardiac interatrial septation in mice using an advanced intercross line
Source: eLife. 2023 Jun 5;12:e83606. doi: 10.7554/eLife.83606 (PMC10284603; doi:10.7554/eLife.83606)
Supplement: Supplementary file 2. [file elife-83606-supp2.xlsx]

## Sheet: 0
Supplementary File 2. Inter-trait correlation coefficients (r) in F14 mice with P-values in brackets
	HW	FVL	FOW	CRW
BW	0.64	0.1	0.005	0.118
	(<0.001)	(0.002)	(0.871)	(<0.001)
HW		0.134	0.072	0.131
		(<0.001)	(0.028)	(<0.001)
FVL			-0.284	0.005
			(<0.001)	(0.890)
FOW				0.117
				(<0.001)
