# Supplementary material for: Quantitative trait and transcriptome analysis of genetic complexity underpinning cardiac interatrial septation in mice using an advanced intercross line
Source: eLife. 2023 Jun 5;12:e83606. doi: 10.7554/eLife.83606 (PMC10284603; doi:10.7554/eLife.83606)
Supplement: Supplementary file 3. [file elife-83606-supp3.xlsx]

## Sheet: Sheet0
Supplementary File 3. QTL identified by AIL study.
Chr	Peak LOD	Peak position (cM)	1 LOD drop-off (cM)	1 LOD drop-off (GRCm38)	Trait (larger in)	QTL direction	mean.qq (mm)1	mean.Qq (mm)2	mean.QQ (mm)3	a.qtl (mm)4	d.qtl (mm)5	Attributable phenotypic variance (%; mm)6
1	2.15	9	6.5-13	21040499-34259095	FVL (QSi5)	cryptic	1.03767	1.01501	0.977457	-0.0301048	0.00744821	5.68015
1	2.34	36	32.25-39.75	63517283-77829115	FVL (QSi5)	normal	0.97307	1.01661	1.0402	0.0335654	0.00997818	6.33309
1	5.99	41.25	40.25-42.25	78314254-82359740	FVL (QSi5)	normal	0.973003	0.998837	1.06881	0.0479032	-0.0220687	9.03834
1	3.06	36.75	34.75-38.75	69155521-75388341	FOW (129T2/SvEms)	normal	0.259313	0.231511	0.22473	-0.0172918	-0.0105108	57.6394
1	4.35	41.25	40-42.5	78102104-82733847	FOW (129T2/SvEms)	normal	0.252023	0.241958	0.215153	-0.0184348	0.00836993	61.4493
2	5.45	101	98.75-103.25	176153875-180705885	FVL (QSi5)	normal	0.967314	1.02201	1.04923	0.0409585	0.0137387	7.72802
2	2.7	72	70-73.75	141352603-149383761	FOW (129T2/SvEms)	normal*	0.225	0.253779	0.22242	-0.00129007	0.0300686	4.30024
2	5.8	99.75	97.75-101.75	174068522-179272470	FOW (129T2/SvEms)	normal	0.260932	0.227641	0.224019	-0.0184569	-0.0148344	61.5231
2	2.91	41.25	39.5-43.026	68314340-72240298	CRW (129T2/SvEms)	normal	0.58379	0.511726	0.540745	-0.0215225	-0.0505409	30.7465
2	2.31	44	43.026-45.5	72240298-77051984	CRW (129T2/SvEms)	normal	0.576902	0.520463	0.533428	-0.0217372	-0.034702	31.0532
4	2.64	9.5	4.75-11.75	10714508-28427018	FVL (QSi5)	cryptic*	1.01773	1.03704	0.965614	-0.026056	0.0453649	4.91622
4	2.85	20.5	15.25-24.75	33849774-46388609	FVL (QSi5)	normal	0.987895	1.0427	0.984475	-0.00170973	0.0565146	0.32259
4	2.74	43.5	41.044-45	87486659-97057113	FVL (QSi5)	cryptic	1.00332	1.03802	0.980445	-0.0114384	0.0461352	2.15819
4	2.25	6	0-7	0-16752668	FOW (129T2/SvEms)	cryptic	0.21829	0.243625	0.241212	0.0114609	0.0138742	38.2029
4	5.97	44.04	42-45	88583969-97057113	FOW (129T2/SvEms)	cryptic	0.239277	0.221116	0.256101	0.00841197	-0.026573	28.0399
4	2.82	32.25	31-33.5	56353298-62883099	CRW (129T2/SvEms)	normal	0.541682	0.567215	0.508627	-0.0165277	0.0420608	23.6111
8	2.22	55.25	51-58.5	102666145-112293428	FVL (QSi5)	normal	0.985577	0.998769	1.05158	0.0330006	-0.0198087	6.22653
8	3.68	66	65-68	117761201-120675742	FVL (QSi5)	normal	0.966352	1.01185	1.04084	0.0372436	0.00824947	7.02709
8	4.7	63.72	56.75-64.25	109238630-117485580	FOW (129T2/SvEms)	cryptic	0.227554	0.229096	0.258257	0.0153511	-0.0138098	51.1704
9	3.76	19.5	18-21.25	33088760-40073032	FVL (QSi5)	normal*	0.974701	1.04977	0.982474	0.00388661	0.0711783	0.733322
9	4.75	23.75	22.5-24.836	41211666-44898632	FVL (QSi5)	cryptic	1.02224	1.03664	0.971173	-0.0255352	0.0399309	4.81797
9	5.55	9.25	7.25-11.75	18872365-26371771	FOW (129T2/SvEms)	cryptic	0.224581	0.226169	0.261581	0.0185001	-0.0169123	61.6669
9	2.53	19.25	17.7274-20.721	32714848-37112966	FOW (129T2/SvEms)	cryptic	0.234635	0.227553	0.25495	0.0101574	-0.0172396	33.8581
9	7.56	24	22.25-26.4443	41166741-48560264	FOW (129T2/SvEms)	cryptic	0.221944	0.225587	0.260963	0.0195096	-0.0158663	65.032
9	7.31	28.25	26.75-29.5	49369477-54168643	FOW (129T2/SvEms)	cryptic	0.222446	0.222374	0.264818	0.0211859	-0.0212575	70.6198
9	4.61	35.5	32.5174-37.75	60183385-68756860	FOW (129T2/SvEms)	cryptic	0.222894	0.229107	0.258161	0.0176334	-0.0114207	58.7779
11	3.89	3.5	0-7.1966	0-12007732	FVL (QSi5)	normal	0.967552	1.0194	1.04371	0.03808	0.0137727	7.1849
11	4.8	9.5	7.75-10.75	12781120-18513681	FVL (QSi5)	normal	0.957885	1.02069	1.04497	0.0435413	0.0192638	8.21534
13	6.09	4.91	0-5	0-12545711	FVL (QSi5)	normal	0.966739	1.00442	1.06064	0.0469482	-0.00926263	8.85815
13	3.57	7	5.9688-9	17152433-22715155	FVL (QSi5)	normal	0.982324	1.00131	1.05143	0.0345544	-0.015567	6.51969
19	3.27	16	14-17.0007	20887529-22544493	FVL (QSi5)	normal	0.973623	1.0092	1.05108	0.0387277	-0.0031537	7.30711
19	3.15	19.25	17.0007-20.5	22544493-25610442	FVL (QSi5)	normal	0.978366	1.00749	1.04732	0.0344794	-0.00536002	6.50556
19	2.14	21.71	20.8274-22.8775	25977807-28325243	FVL (QSi5)	normal	0.980839	1.00983	1.03591	0.0275367	0.0014507	5.1956
19	2.16	4.47	2-7.0149	2157705-10680475	FOW (129T2/SvEms)	normal	0.251644	0.237165	0.226168	-0.012738	-0.00174101	42.4598
19	2.02	11.5	9.184-13.167	14673992-18397593	FOW (129T2/SvEms)	normal	0.250796	0.236223	0.225668	-0.0125641	-0.00200869	41.8804
19	2.96	16	14.5949-17.0007	21395559-22544493	FOW (129T2/SvEms)	normal	0.256955	0.232677	0.226506	-0.0152242	-0.0090533	50.7472
19	3.95	19.75	17.5-20.8274	22906164-25977807	FOW (129T2/SvEms)	normal	0.258379	0.234387	0.223229	-0.0175753	-0.00641725	58.5843
1 Phenotypic mean for genotype qq (homozygous for the 129T2/SvEms allele)
2 Phenotypic mean for genotype Qq
3 Phenotypic mean for genotype QQ (homozygous for the QSi5 allele)
4 Additive genetic effect of the QTL
5 Dominance genetic effect of the QTL
6 Percentage of the phenotypic variance between the parental strains explained by one allele of the QTL
* The QTL direction was conflicting when called based on the first flanking SNP marker on either side of the QTL peak. Therefore, the direction was called only on the basis of the closest SNP marker to the QTL peak.
