# Supplementary material for: Quantitative trait and transcriptome analysis of genetic complexity underpinning cardiac interatrial septation in mice using an advanced intercross line
Source: eLife. 2023 Jun 5;12:e83606. doi: 10.7554/eLife.83606 (PMC10284603; doi:10.7554/eLife.83606)
Supplement: Supplementary file 4. [file elife-83606-supp4.xlsx]

## Sheet: Variants
Supplementary File 4. High impact, deleterious missense, and deletion variants between 129T2/SvEms and QSi5 strains. Sheet two contains septal development gene expression data for each gene - mean CPM and DE results between the strains
Strain	Chr	Star	End	Reference	Variant	Gene_symbol	Effect	Classification	Variant_identifier	SNP density of the region	NOTE
129T2/SvEms	chr8	114133648	114133648	G	-	Nudt7	frameshift deletion	High impact	Name=rs254686080	high
129T2/SvEms	chr9	50763858	50763858	A	G	1110032A03Rik	stoploss	High impact	Name=rs32749244	high
129T2/SvEms	chr1	34188258	34188258	A	G	Dst	nonsynonymous SNV	Deleterious (SIFT)	Name=rs36656387	high
129T2/SvEms	chr1	34189044	34189044	T	C	Dst	nonsynonymous SNV	Deleterious (SIFT)	Name=rs220606347	high
129T2/SvEms	chr1	34251829	34251829	G	A	Dst	nonsynonymous SNV	Deleterious (SIFT)	Name=rs31003940	high
129T2/SvEms	chr1	75491230	75491230	G	C	Obsl1	nonsynonymous SNV	Deleterious (SIFT)	Name=rs30512166	high
129T2/SvEms	chr2	174462517	174462517	A	C	Atp5e	nonsynonymous SNV	Deleterious (SIFT)	Name=rs28261286	high
129T2/SvEms	chr4	9621912	9621912	C	A	Asph	nonsynonymous SNV	Deleterious (SIFT)	Name=rs27710947	high
129T2/SvEms	chr4	15976138	15976138	C	G	Nbn	nonsynonymous SNV	Deleterious (SIFT)	Name=rs220847792	low
129T2/SvEms	chr4	45279416	45279416	T	C	Frmpd1	nonsynonymous SNV	Deleterious (SIFT)	Name=rs32571213	low
129T2/SvEms	chr8	104442495	104442495	C	G	Dync1li2	nonsynonymous SNV	Deleterious (SIFT)	NA	low
129T2/SvEms	chr8	114133629	114133629	T	C	Nudt7	nonsynonymous SNV	Deleterious (SIFT)	Name=rs50143885	high
129T2/SvEms	chr8	114135395	114135395	G	C	Nudt7	nonsynonymous SNV	Deleterious (SIFT)	Name=rs36957274	high
129T2/SvEms	chr9	19648002	19648002	A	G	Zfp317	nonsynonymous SNV	Deleterious (SIFT)	Name=rs30026337	high
129T2/SvEms	chr9	44315169	44315169	G	A	C2cd2l	nonsynonymous SNV	Deleterious (SIFT)	Name=rs32609280	high
129T2/SvEms	chr9	44694460	44694460	G	A	Phldb1	nonsynonymous SNV	Deleterious (SIFT)	Name=rs226359327	high
129T2/SvEms	chr9	44953029	44953029	G	A	Ube4a	nonsynonymous SNV	Deleterious (SIFT)	Name=rs32638708	high
129T2/SvEms	chr9	45266550	45266550	T	C	Il10ra	nonsynonymous SNV	Deleterious (SIFT)	Name=rs29639715	high
129T2/SvEms	chr9	45770874	45770874	G	T	Cep164	nonsynonymous SNV	Deleterious (SIFT)	Name=rs48502272	high
129T2/SvEms	chr9	45775914	45775914	G	A	Cep164	nonsynonymous SNV	Deleterious (SIFT)	Name=rs32647207	high
129T2/SvEms	chr9	45776806	45776806	G	T	Cep164	nonsynonymous SNV	Deleterious (SIFT)	Name=rs32647965	high
129T2/SvEms	chr9	45778479	45778479	G	A	Cep164	nonsynonymous SNV	Deleterious (SIFT)	Name=rs32640978	high
129T2/SvEms	chr9	45779404	45779404	T	A	Cep164	nonsynonymous SNV	Deleterious (SIFT)	Name=rs251347235	high
129T2/SvEms	chr9	45787444	45787444	T	A	Cep164	nonsynonymous SNV	Deleterious (SIFT)	Name=rs32645146	high
129T2/SvEms	chr9	45809832	45809832	G	A	Cep164	nonsynonymous SNV	Deleterious (SIFT)	Name=rs30220443	high
129T2/SvEms	chr9	46211812	46211812	G	C	Sik3	nonsynonymous SNV	Deleterious (SIFT)	Name=rs32676144	high
129T2/SvEms	chr9	50619816	50619816	A	C	Pih1d2	nonsynonymous SNV	Deleterious (SIFT)	Name=rs228989571	high
129T2/SvEms	chr9	51062243	51062243	G	T	Layn	nonsynonymous SNV	Deleterious (SIFT)	Name=rs252220084	high
129T2/SvEms	chr9	67883547	67883547	A	G	Vps13c	nonsynonymous SNV	Deleterious (SIFT)	Name=rs249613143	high
129T2/SvEms	chr11	5281282	5281282	A	C	Znrf3	nonsynonymous SNV	Deleterious (SIFT)	Name=rs259409042	high
129T2/SvEms	chr11	6599922	6599922	C	T	Nacad	nonsynonymous SNV	Deleterious (SIFT)	Name=rs26911247	high
129T2/SvEms	chr11	6600734	6600734	G	A	Nacad	nonsynonymous SNV	Deleterious (SIFT)	Name=rs50563216	high
129T2/SvEms	chr11	7150839	7150839	C	T	Adcy1	nonsynonymous SNV	Deleterious (SIFT)	Name=rs26913279	high
129T2/SvEms	chr13	21520006	21520006	C	G	Zkscan8	nonsynonymous SNV	Deleterious (SIFT)	Name=rs29946347	high
129T2/SvEms	chr19	17121833	17121833	C	T	Prune2	nonsynonymous SNV	Deleterious (SIFT)	Name=rs38726911	high
129T2/SvEms	chr19	17122042	17122042	T	C	Prune2	nonsynonymous SNV	Deleterious (SIFT)	Name=rs45804446	high
129T2/SvEms	chr19	17122085	17122085	A	G	Prune2	nonsynonymous SNV	Deleterious (SIFT)	Name=rs50457882	high
129T2/SvEms	chr19	17122463	17122463	C	T	Prune2	nonsynonymous SNV	Deleterious (SIFT)	Name=rs37656092	high
129T2/SvEms	chr19	17123509	17123509	G	A	Prune2	nonsynonymous SNV	Deleterious (SIFT)	Name=rs38750642	high
129T2/SvEms	chr2	143988614	143988637	CCCCTCTCCTTTCTTGCCCTGGTT	-	Rrbp1	nonframeshift deletion	Non-frameshift deletion	Name=rs45959629,rs387009773,rs226812382	high
129T2/SvEms	chr4	9610888	9610893	CCTCCT	-	Asph	nonframeshift deletion	Non-frameshift deletion	Name=rs231579628,rs387492154	high
129T2/SvEms	chr9	44140641	44140649	CCTCAGCAC	-	Mcam	nonframeshift deletion	Non-frameshift deletion	Name=rs237309181	high
129T2/SvEms	chr9	44508404	44508415	CCACCCCCACCA	-	Bcl9l	nonframeshift deletion	Non-frameshift deletion	Name=rs252830528	high
129T2/SvEms	chr9	44607533	44607535	CAC	-	Ddx6	nonframeshift deletion	Non-frameshift deletion	Name=rs249494713	high
129T2/SvEms	chr9	45794124	45794128	CTCTC	-	Cep164	frameshift deletion	Non-frameshift deletion	Name=rs227499548,rs32649560	high	ANNOVA classifies as a 4bp frameshift variant, but from manual inspection is a 3bp non-frameshift deletion.
Qsi5	chr9	64182222	64182223	GG	-	Snapc5	frameshift deletion	High impact	Name=rs260904673,rs231386278	high
Qsi5	chr9	64182225	64182234	GGAGGAAGAG	-	Snapc5	frameshift deletion	High impact	Name=rs260904673,rs231386278	high
Qsi5	chr13	21423407	21423407	G	A	Pgbd1	stopgain	High impact	Name=rs29635983	high
Qsi5	chr1	75528330	75528330	G	C	Stk11ip	nonsynonymous SNV	Deleterious (SIFT)	NA	high
Qsi5	chr1	80586657	80586657	G	A	Dock10	nonsynonymous SNV	Deleterious (SIFT)	NA	high
Qsi5	chr1	80592814	80592814	T	C	Dock10	nonsynonymous SNV	Deleterious (SIFT)	NA	high
Qsi5	chr2	69492356	69492356	G	A	Lrp2	nonsynonymous SNV	Deleterious (SIFT)	Name=rs27958171	high
Qsi5	chr2	69505263	69505263	G	A	Lrp2	nonsynonymous SNV	Deleterious (SIFT)	Name=rs28009438	high
Qsi5	chr2	69750267	69750267	C	T	Ppig	nonsynonymous SNV	Deleterious (SIFT)	Name=rs27957019	high
Qsi5	chr2	70981950	70981950	G	A	Mettl8	nonsynonymous SNV	Deleterious (SIFT)	Name=rs29536309	high
Qsi5	chr2	71138347	71138347	A	G	Cybrd1	nonsynonymous SNV	Deleterious (SIFT)	Name=rs264528710	high
Qsi5	chr2	145963489	145963489	T	C	Cfap61	nonsynonymous SNV	Deleterious (SIFT)	Name=rs27257758	high
Qsi5	chr4	41313412	41313412	T	G	Dcaf12	nonsynonymous SNV	Deleterious (SIFT)	Name=rs13473869	low
Qsi5	chr4	43004915	43004915	A	C	Fancg	nonsynonymous SNV	Deleterious (SIFT)	Name=rs213538690	high
Qsi5	chr4	43004997	43004997	G	C	Fancg	nonsynonymous SNV	Deleterious (SIFT)	Name=rs215962912	high
Qsi5	chr4	58946254	58946254	A	G	Zkscan16	nonsynonymous SNV	Deleterious (SIFT)	Name=rs32352855	high
Qsi5	chr9	25586785	25586785	G	A	Eepd1	nonsynonymous SNV	Deleterious (SIFT)	Name=rs38340634	high
Qsi5	chr9	45749732	45749732	G	C	Dscaml1	nonsynonymous SNV	Deleterious (SIFT)	Name=rs32648240	high
Qsi5	chr9	50752189	50752189	G	A	Hspb2	nonsynonymous SNV	Deleterious (SIFT)	Name=rs30082178	high
Qsi5	chr9	50767860	50767860	G	T	1110032A03Rik	nonsynonymous SNV	Deleterious (SIFT)	Name=rs49831640	high
Qsi5	chr9	50767877	50767877	T	C	1110032A03Rik	nonsynonymous SNV	Deleterious (SIFT)	Name=rs13475553	high
Qsi5	chr9	64012247	64012247	C	G	Smad6	nonsynonymous SNV	Deleterious (SIFT)	Name=rs251513460	high
Qsi5	chr9	64889674	64889674	G	T	Dennd4a	nonsynonymous SNV	Deleterious (SIFT)	Name=rs32858216	low
Qsi5	chr11	4143850	4143850	G	A	Ccdc157	nonsynonymous SNV	Deleterious (SIFT)	Name=rs29415162	low
Qsi5	chr11	4144530	4144530	C	G	Ccdc157	nonsynonymous SNV	Deleterious (SIFT)	Name=rs29457831	low
Qsi5	chr11	5801722	5801722	G	A	Pgam2	nonsynonymous SNV	Deleterious (SIFT)	Name=rs26931498	high
Qsi5	chr11	6475507	6475507	G	A	Purb	nonsynonymous SNV	Deleterious (SIFT)	Name=rs29432026	high
Qsi5	chr11	8451097	8451097	G	A	Tns3	nonsynonymous SNV	Deleterious (SIFT)	Name=rs26926446	high
Qsi5	chr11	9294545	9294545	G	A	Abca13	nonsynonymous SNV	Deleterious (SIFT)	Name=rs29474876	high
Qsi5	chr11	9328117	9328117	C	T	Abca13	nonsynonymous SNV	Deleterious (SIFT)	Name=rs51016584	high
Qsi5	chr11	9465004	9465004	G	A	Abca13	nonsynonymous SNV	Deleterious (SIFT)	Name=rs29393145	high
Qsi5	chr13	21479136	21479136	C	T	Zkscan4	nonsynonymous SNV	Deleterious (SIFT)	Name=rs29995268	high
Qsi5	chr19	3292469	3292469	C	T	Mrpl21	nonsynonymous SNV	Deleterious (SIFT)	Name=rs36342995	high
Qsi5	chr19	3904246	3904246	C	T	Tcirg1	nonsynonymous SNV	Deleterious (SIFT)	Name=rs13471558	high
Qsi5	chr19	3911199	3911199	T	C	Ndufs8	nonsynonymous SNV	Deleterious (SIFT)	Name=rs38845618	high
Qsi5	chr19	4692465	4692465	C	G	Gm960	nonsynonymous SNV	Deleterious (SIFT)	Name=rs36625279	high
Qsi5	chr19	4698280	4698280	C	G	Gm960	nonsynonymous SNV	Deleterious (SIFT)	Name=rs265269958	high
Qsi5	chr19	6250421	6250421	G	A	Atg2a	nonsynonymous SNV	Deleterious (SIFT)	NA	high
Qsi5	chr19	10517066	10517066	T	G	Sdhaf2	nonsynonymous SNV	Deleterious (SIFT)	Name=rs13472215	high
Qsi5	chr19	17119899	17119899	T	G	Prune2	nonsynonymous SNV	Deleterious (SIFT)	Name=rs30952040	high
Qsi5	chr19	24280553	24280553	C	T	Fxn	nonsynonymous SNV	Deleterious (SIFT)	Name=rs107790377	high
Qsi5	chr2	71138513	71138515	ATG	-	Cybrd1	nonframeshift deletion	Non-frameshift deletion	Name=rs221303075	high
Qsi5	chr2	71138563	71138571	CAGCTGACC	-	Cybrd1	nonframeshift deletion	Non-frameshift deletion	Name=rs387355242,rs261498768	high
Qsi5	chr2	71873447	71873452	GGCCTC	-	Pdk1	nonframeshift deletion	Non-frameshift deletion	Name=rs222188523	high
Qsi5	chr4	43425780	43425785	GCAGCA	-	Rusc2	nonframeshift deletion	Non-frameshift deletion	Name=rs256140576	high
Qsi5	chr13	21479201	21479203	GAG	-	Zkscan4	nonframeshift deletion	Non-frameshift deletion	Name=rs261430860	high
Qsi5	chr19	7422753	7422764	CCGCCACCTCCA	-	2700081O15Rik	nonframeshift deletion	Non-frameshift deletion	NA	low

## Sheet: Gene expression
Gene	E12.5_QSi5_mean_CPM	E12.5_129T2_mean_CPM	E14.5_QSi5_mean_CPM	E14.5_129T2_mean_CPM	E16.5_QSi5_mean_CPM	E16.5_129T2_mean_CPM	E12.5_DEG	E14.5_DEG	E16.5_DEG
Nudt7	10.4746	9.89295	20.2618	11.3516	19.5959	8.73277	FALSE	TRUE	TRUE
1110032A03Rik	0	0.59345	0	0.531967	1.27258	1.00844	FALSE	FALSE	FALSE
Dst	7.21418	9.93034	11.1942	11.9984	23.7928	13.9984	FALSE	FALSE	TRUE
Obsl1	63.879	57.4908	95.3439	53.7222	71.0954	73.6238	FALSE	TRUE	FALSE
Atp5e	38.1694	78.3597	89.7136	76.8553	62.8991	67.8067	TRUE	FALSE	FALSE
Asph	217.894	278.316	276.142	311.953	423.658	338.728	FALSE	FALSE	FALSE
Nbn	28.2319	43.8942	50.4138	51.9279	42.2291	42.0727	FALSE	FALSE	FALSE
Frmpd1	30.2619	22.2125	27.5815	17.8161	17.8169	18.8786	TRUE	FALSE	FALSE
Dync1li2	135.636	171.54	180.495	181.964	138.239	150.783	FALSE	FALSE	FALSE
Zfp317	24.5341	35.9655	37.5128	40.8589	32.6447	33.1739	FALSE	FALSE	FALSE
C2cd2l	4.45562	3.6948	4.62773	2.98893	4.07929	3.57404	FALSE	FALSE	FALSE
Phldb1	34.8873	31.51	33.9561	25.5161	29.3666	30.1036	FALSE	FALSE	FALSE
Ube4a	61.963	77.9083	57.2427	75.4337	68.3961	57.0718	FALSE	FALSE	FALSE
Il10ra	1.76554	1.67252	2.48603	1.65329	1.51543	1.18095	FALSE	FALSE	FALSE
Cep164	31.2008	24.5865	31.1181	19.617	24.9204	26.6144	TRUE	FALSE	FALSE
Sik3	161.718	131.661	102.293	112.587	190.502	179.232	TRUE	FALSE	FALSE
Pih1d2	1.27696	2.0575	1.62257	2.33943	2.64513	1.84116	FALSE	FALSE	FALSE
Layn	8.83933	6.06229	11.3402	7.77823	9.74255	5.87583	FALSE	FALSE	FALSE
Vps13c	115.422	124.677	109.948	133.108	160.437	113.828	FALSE	FALSE	FALSE
Znrf3	184.89	154.132	104.874	126.027	155.021	133.473	FALSE	FALSE	FALSE
Nacad	0.686013	1.03516	1.04602	0.416605	1.03727	0.836849	FALSE	FALSE	FALSE
Adcy1	14.5674	30.6221	18.9259	23.2703	17.8564	40.2889	TRUE	FALSE	TRUE
Zkscan8	48.7106	59.183	62.3089	69.1131	62.111	47.0021	FALSE	FALSE	FALSE
Prune2	40.0678	57.2135	38.7084	59.2447	60.8059	61.3248	FALSE	TRUE	FALSE
Rrbp1	199.149	193.845	182.875	194.991	210.866	218.412	FALSE	FALSE	FALSE
Mcam	153.073	222.982	292.969	261.972	190.169	310.576	FALSE	FALSE	TRUE
Bcl9l	8.90268	6.52443	5.87894	6.74166	7.96368	8.70295	FALSE	FALSE	FALSE
Ddx6	255.025	182.084	146.472	176.42	204.345	121.347	TRUE	FALSE	TRUE
Snapc5	4.90878	9.09734	10.5073	11.0602	7.01773	9.4173	FALSE	FALSE	FALSE
Pgbd1	10.4996	8.17001	9.91087	8.60435	13.2277	7.83306	FALSE	FALSE	FALSE
Stk11ip	13.6607	18.2612	19.4473	14.9988	12.7198	14.1672	FALSE	FALSE	FALSE
Dock10	35.5373	42.936	43.5961	59.792	60.5629	57.1356	FALSE	FALSE	FALSE
Lrp2	17.9136	23.515	34.5571	32.8931	18.5068	20.8111	FALSE	FALSE	FALSE
Ppig	90.3974	104.015	72.2426	103.555	88.6333	70.2691	FALSE	FALSE	FALSE
Mettl8	12.742	14.5564	12.355	14.9802	14.2117	12.6422	FALSE	FALSE	FALSE
Cybrd1	4.74217	5.37146	5.50623	6.37536	7.36402	7.48897	FALSE	FALSE	FALSE
Cfap61	1.16432	1.65752	1.17521	1.26512	12.1776	1.9008	FALSE	FALSE	FALSE
Dcaf12	45.4326	53.185	53.0695	47.512	47.0914	41.1345	FALSE	FALSE	FALSE
Fancg	7.52876	8.84822	10.1502	7.34633	5.53279	7.05724	FALSE	FALSE	FALSE
Zkscan16	2.18239	2.80398	1.44153	2.76916	1.22637	1.03643	FALSE	FALSE	FALSE
Eepd1	70.0127	65.2052	53.0059	60.4868	53.3324	58.8056	FALSE	FALSE	FALSE
Dscaml1	9.20536	2.73116	10.1569	4.39021	8.47564	12.4775	TRUE	FALSE	FALSE
Hspb2	10.0065	14.2786	18.8786	11.2882	9.43587	11.9471	FALSE	FALSE	FALSE
Smad6	215.163	124.945	90.9986	94.6385	72.9941	148.314	FALSE	FALSE	TRUE
Dennd4a	46.0547	46.5795	39.3578	45.5077	69.367	45.9601	FALSE	FALSE	FALSE
Ccdc157	12.1936	16.5969	13.0765	17.1168	10.9585	17.4242	FALSE	FALSE	FALSE
Pgam2	60.6821	91.8777	149.902	81.8359	76.2115	89.5212	FALSE	TRUE	FALSE
Purb	96.3441	115.73	106.015	119.16	177.84	113.395	FALSE	FALSE	TRUE
Tns3	167.467	127.047	148.559	143.739	189.98	165.05	TRUE	FALSE	FALSE
Abca13	0.727014	1.23515	1.05024	1.19296	2.44534	1.35391	FALSE	FALSE	FALSE
Zkscan4	2.12238	3.49155	3.64774	3.84348	2.50067	2.67938	FALSE	FALSE	FALSE
Mrpl21	14.1767	21.158	27.0552	21.4114	14.0222	19.5485	FALSE	FALSE	FALSE
Tcirg1	8.48528	8.92192	13.0657	8.15767	6.62995	7.80967	FALSE	FALSE	FALSE
Ndufs8	19.6194	33.376	46.9533	27.3083	21.225	30.7533	FALSE	TRUE	FALSE
Gm960	2.28043	2.45639	1.88889	2.74073	2.35575	2.53532	FALSE	FALSE	FALSE
Atg2a	9.07659	8.09543	9.97977	6.97456	6.89056	9.76507	FALSE	FALSE	FALSE
Sdhaf2	28.6933	32.0155	35.9422	34.0041	31.4878	29.7132	FALSE	FALSE	FALSE
Fxn	13.8347	16.7574	16.2649	13.3931	14.6928	13.7098	FALSE	FALSE	FALSE
Pdk1	108.391	140.377	213.443	181.184	263.542	169.469	FALSE	FALSE	TRUE
Rusc2	13.6828	9.70905	14.3726	10.9	21.8107	19.0727	TRUE	FALSE	FALSE
2700081O15Rik	34.7021	41.4295	45.3031	37.501	26.9013	32.5435	FALSE	FALSE	FALSE
