# Supplementary material for: Quantitative trait and transcriptome analysis of genetic complexity underpinning cardiac interatrial septation in mice using an advanced intercross line
Source: eLife. 2023 Jun 5;12:e83606. doi: 10.7554/eLife.83606 (PMC10284603; doi:10.7554/eLife.83606)
Supplement: Supplementary file 5. [file elife-83606-supp5.xlsx]

## Sheet: Spliceogen results
Supplementary File 5. Splicing analysis of Tbx20 variants. Tab 1 showing Spliceogen output. Tab 2 showing Spliceogen gain predictions. Tab 3 shows Tbx20 splice junctions per strain/timepoint. Tab 4 shows DESeq2 results for comparison of transcript abundances between the strains.
#CHR	START	END	REF	ALT	GENE	withinSite	mesDonRef	mesDonAlt	mesAccRef	mesAccAlt	gsDonRef	gsDonAlt	gsAccRef	gsAccAlt	ESEmaxRef	ESEmaxAlt	ESSminRef	ESSminAlt	donGainP	accGainP	donLossP	accLossP
chr9	24719824	24719824	C	T	Dpy19l2	0	-1.6	-9.78	1.83	3.07	0	0	0	0	0	0	-0.387	-0.413	0.03	0.5	0	0
chr9	24719933	24719933	C	T	Dpy19l2	0	-0.94	-9.12	0	0	0	0	0	0	0	0	-0.589	-0.813	0.03	0	0	0
chr9	24719944	24719944	T	A	Dpy19l2	0	0	0	0	0	0	0	0	0	0.351	0.329	0	-0.456	0.02	0	0	0
chr9	24721153	24721153	A	G	Tbx20	0	0	0	8.81	9.12	0	0	0	0	0	0	-0.648	-0.189	0.02	0.83	0	0
chr9	24721185	24721185	T	A	Tbx20	0	-5.12	-7.18	0.32	1.16	0	0	0	0	0.424	0.778	-0.367	-0.303	0.11	0.35	0	0
chr9	24721248	24721248	C	G	Tbx20	0	-5.13	-3.81	0	0	0	0	0	0	0.595	0	0	-0.466	0.32	0	0	0
chr9	24721275	24721276	AT	0	Tbx20	0	3.3	-1.13	0	0	0	0	0	0	0	0	-0.335	-0.159	0.32	0	0	0
chr9	24721366	24721366	0	AA	Tbx20	0	0	0	0	0	0	0	0	0	0	0	-0.705	-1.05	0.02	0	0	0
chr9	24721376	24721376	C	G	Tbx20	0	-6.3	-16.08	0	0	0	0	0	0	0	0	0	0	0	0	0	0
chr9	24721384	24721391	CAGGCAGG	0	Tbx20	0	-4.53	-6.3	0	0	0	0	0	0	0.31	0	0	0	0.14	0	0	0
chr9	24721397	24721398	AG	0	Tbx20	0	-10.19	-8.2	0	0	0	0	0	0	0	0.308	0	-0.307	0.14	0	0	0
chr9	24721410	24721410	A	C	Tbx20	0	-25.32	-16.82	-0.23	0.36	0	0	0	0	0	0.466	-0.691	-0.306	0.04	0.3	0	0
chr9	24721512	24721512	C	G	Tbx20	0	-13.98	-14.61	-4.03	4.48	0	0	0	0	0	0.121	-0.179	-0.341	0.02	0.77	0	0
chr9	24721556	24721556	0	A	Tbx20	0	0	0	4.98	6.4	0	0	0	0	0.545	0	-1.05	-1.061	0.02	0.72	0	0
chr9	24721706	24721706	T	A	Tbx20	0	0	0	-1.83	-1.99	0	0	0	0	0	0	-0.343	-0.42	0.02	0.16	0	0
chr9	24721756	24721756	G	T	Tbx20	0	0	0	7.92	7.44	0	0	0	0	0.312	0	0	-0.343	0.02	0.74	0	0
chr9	24721766	24721766	C	G	Tbx20	0	3.08	-5.2	-6.65	-14.72	0	0	0	0	0.211	0	-0.251	0	0.09	0	0	0
chr9	24721820	24721820	C	G	Tbx20	0	0	0	-6.15	-8.99	0	0	0	0	0.336	0.325	-0.377	0	0.02	0.02	0	0
chr9	24721911	24721911	C	T	Tbx20	0	-23.4	-31.58	-7.94	-11.16	0	0	0	0	0	0	-0.355	-0.813	0	0.01	0	0
chr9	24722024	24722024	A	G	Tbx20	0	-11.16	-7.04	0	0	0	0	0	0	0	0.684	-0.616	-0.38	0.22	0	0	0
chr9	24722038	24722038	A	T	Tbx20	0	0	0	-2.94	-4.94	0	0	0	0	0	0	-0.622	-0.656	0.02	0.06	0	0
chr9	24722039	24722039	T	C	Tbx20	0	-30.81	-22.63	-2.94	-7.54	0	0	0	0	0	0	-0.35	-0.518	0.01	0.02	0	0
chr9	24722176	24722176	T	C	Tbx20	0	0	0	-22.38	-13.63	0	0	0	0	0.477	0.27	0	-0.294	0.02	0.02	0	0
chr9	24722179	24722179	A	G	Tbx20	0	-0.92	-1.18	0	0	0	0	0	0	0.449	0.473	-0.295	0	0.44	0	0	0
chr9	24722210	24722210	A	G	Tbx20	0	-0.87	3.89	2.74	3.41	0	0	0	0	0	0	-0.796	-0.433	0.85	0.5	0	0
chr9	24722264	24722264	G	A	Tbx20	0	-23.28	-21.14	2.09	2.05	0	0	0	0	0.663	0	0	-0.259	0.01	0.39	0	0
chr9	24722406	24722406	T	G	Tbx20	0	0	0	0	0	0	0	0	0	0	0	-0.569	-0.429	0.02	0	0	0
chr9	24722612	24722612	G	A	Tbx20	0	0	0	3.52	3.59	0	0	0	0	0.449	0.323	-0.682	-0.507	0.02	0.5	0	0
chr9	24723004	24723004	T	0	Tbx20	0	0	0	0	0	0	0	0	0	0.184	0.184	-0.632	-0.563	0.02	0	0	0
chr9	24723036	24723036	G	A	Tbx20	0	3.46	1.99	6.81	6.39	0	0	0	0	0.477	0.142	0	-0.173	0.61	0.68	0	0
chr9	24723047	24723047	A	C	Tbx20	0	-16.33	-7.83	-3.51	5.09	0	0	0	0	0	0.468	-0.599	-0.256	0.29	0.8	0	0
chr9	24723049	24723049	T	A	Tbx20	0	-15.36	-7.18	0	0	0	0	0	0	0	0	0	-0.564	0.31	0	0	0
chr9	24723180	24723180	0	G	Tbx20	0	0	0	0.23	0.15	0	0	0	0	0	0.458	0	0	0.02	0.27	0	0
chr9	24723281	24723281	G	A	Tbx20	0	-2.33	5.42	4.35	4.23	0	0	0	0	0	0	0	-0.549	0.92	0.54	0	0
chr9	24723304	24723304	T	C	Tbx20	0	3.1	-3.35	0	0	0	0	0	0	0	0	-0.674	-0.532	0.17	0	0	0
chr9	24723492	24723492	A	C	Tbx20	0	-15.14	-6.64	2.75	1.62	0	0	0	0	0.354	0.215	0	0	0.36	0.33	0	0
chr9	24723726	24723737	AACAGAGTAGAA	0	Tbx20	0	-1.65	-1.65	4.59	3.43	0	0	0	0	0.436	0	-0.491	-0.475	0.41	0.46	0	0
chr9	24723739	24723739	A	C	Tbx20	0	-7.83	-12.65	0	0	0	0	0	0	0	0.273	-0.491	-0.196	0.02	0	0	0
chr9	24723742	24723742	A	T	Tbx20	0	-7.83	0.87	2.48	1.51	0	0	0	0	0.468	0	-0.436	-0.674	0.81	0.33	0	0
chr9	24723747	24723756	CATTAAAAAA	0	Tbx20	0	-7.83	-6.37	2.48	-0.58	0	0	0	0	0.468	0	-0.599	0	0.2	0.18	0	0
chr9	24723825	24723825	T	G	Tbx20	0	0	0	-7.34	-7.26	0	0	0	0	0.458	0.154	0	-0.311	0.02	0.04	0	0
chr9	24723919	24723919	0	G	Tbx20	0	0	0	0.76	0.89	0	0	0	0	0	0	-0.302	-0.302	0.02	0.32	0	0
chr9	24724113	24724113	0	A	Tbx20	0	0	0	0.72	0.72	0	0	0	0	0	0	-0.451	-0.451	0.02	0.3	0	0
chr9	24724294	24724294	A	G	Tbx20	0	0	0	0	0	0	0	0	0	0	0	-0.463	-0.59	0.02	0	0	0
chr9	24724377	24724377	A	G	Tbx20	0	0	0	0	0	0	0	0	0	0	0.387	-0.373	0	0.02	0	0	0
chr9	24724381	24724381	T	C	Tbx20	0	0	0	0	0	0	0	0	0	0.229	0.637	-0.373	0	0.02	0	0	0
chr9	24724433	24724433	A	G	Tbx20	0	-23.87	-31.63	7.02	6.86	0	0	0	0	0.18	0.337	-0.218	0	0	0.71	0	0
chr9	24724434	24724434	C	A	Tbx20	0	-23.87	-32.38	7.02	7.67	0	0	0	0	0.333	0	0	-0.78	0	0.77	0	0
chr9	24724450	24724450	G	T	Tbx20	0	0	0	0	0	0	0	0	0	0.314	0.228	0	-0.504	0.02	0	0	0
chr9	24724454	24724454	0	TTTTT	Tbx20	0	0	0	0	0	0	0	0	0	0	0	-0.601	-0.365	0.02	0	0	0
chr9	24724458	24724458	A	T	Tbx20	0	0	0	0	0	0	0	0	0	0	0	-0.601	-0.616	0.02	0	0	0
chr9	24724522	24724522	A	0	Tbx20	0	0	0	8.26	7.56	0	0	0	0	0	0	-0.599	0	0.02	0.74	0	0
chr9	24724561	24724561	T	C	Tbx20	0	0	0	-3.55	-2.05	0	0	0	0	0.176	0.242	-0.321	-0.337	0.02	0.19	0	0
chr9	24724576	24724576	A	C	Tbx20	0	-2.31	-2.27	-3.55	-5.44	0	0	0	0	0	0	0	-0.35	0.38	0.06	0	0
chr9	24724747	24724747	T	C	Tbx20	0	-16.48	-8.3	-11.03	-2.28	0	0	0	0	0.266	0.237	-0.466	-0.227	0.25	0.32	0	0
chr9	24724793	24724793	A	T	Tbx20	0	0	0	8.85	7.5	0	0	0	0	0	0	-0.436	-0.436	0.02	0.72	0	0
chr9	24724802	24724802	A	G	Tbx20	0	0	0	8.85	8.57	0	0	0	0	0	0	-0.78	-0.78	0.02	0.8	0	0
chr9	24724833	24724833	A	G	Tbx20	0	0	0	0	0	0	0	0	0	0	0.513	-0.373	0	0.02	0	0	0
chr9	24724879	24724879	A	G	Tbx20	0	-16.79	-13.04	0	0	0	0	0	0	0	0.406	-0.253	0	0.05	0	0	0
chr9	24724922	24724922	C	T	Tbx20	0	0	0	5.53	5.57	0	0	0	0	0.47	0	-0.08	-0.305	0.02	0.64	0	0
chr9	24725316	24725316	C	T	Tbx20	0	0	0	-3.29	-5.59	0	0	0	0	0.545	0.795	-0.407	0	0.02	0.05	0	0
chr9	24725464	24725464	C	T	Tbx20	0	0	0	0	0	0	0	0	0	0.663	0	-0.318	-0.373	0.02	0	0	0
chr9	24725743	24725743	C	T	Tbx20	0	1.77	0.05	6.05	6.03	0	0	0	0	0.652	0	0	-0.292	0.47	0.67	0	0
chr9	24725795	24725795	A	G	Tbx20	ENSMUSE00000406746.3_acceptor	0	0	9.07	8.61	0	0	0	0	0.323	0	-0.561	-0.066	0.02	0.22	0	0.36
chr9	24725814	24725814	G	A	Tbx20	0	-24.78	-21.44	-17.8	-17.88	0	0	0	0	0.271	0	-0.467	-0.494	0.01	0	0	0
chr9	24725857	24725857	C	G	Tbx20	0	0	0	-0.29	0.15	0	0	0	0	0.298	0	0	0	0.02	0.28	0	0
chr9	24725882	24725882	C	G	Tbx20	0	0	0	-8.4	-6.22	0	0	0	0	0.922	0.551	0	0	0.02	0.07	0	0
chr9	24725913	24725913	T	A	Tbx20	0	1.69	-2.47	-15.8	-15.12	0	0	0	0	0.48	0.335	-0.578	-0.579	0.25	0	0	0
chr9	24725951	24725951	A	T	Tbx20	0	-6.34	-3.5	0.7	-0.46	0	0	0	0	0	0.196	-0.305	0	0.38	0.21	0	0
chr9	24726048	24726048	G	T	Tbx20	0	0	0	0.13	-0.45	0	0	0	0	0.477	0.442	0	0	0.02	0.23	0	0
chr9	24726053	24726055	TTT	0	Tbx20	0	0	0	0.13	0.13	0	0	0	0	0.449	0.449	-0.343	-0.343	0.02	0.27	0	0
chr9	24726060	24726060	0	AAAAA	Tbx20	0	0	0	0	0	0	0	0	0	0	0	-0.436	-0.436	0.02	0	0	0
chr9	24726092	24726092	A	G	Tbx20	0	0	0	-3.81	-4.1	0	0	0	0	0	0.414	-0.296	-0.257	0.02	0.1	0	0
chr9	24726118	24726118	T	A	Tbx20	0	-13.27	-19.22	3.18	3.08	0	0	0	0	0	0	-0.365	-0.616	0	0.46	0	0
chr9	24726171	24726171	C	T	Tbx20	0	0	0	-6.2	-7.28	0	0	0	0	0.651	0	0	0	0.02	0.04	0	0
chr9	24726183	24726183	C	T	Tbx20	0	-10.34	-23.68	5.53	0.88	0	0	0	0	0.352	0.454	-0.279	-0.237	0	0.22	0	0
chr9	24726245	24726245	G	A	Tbx20	0	0	0	0.1	0.06	0	0	0	0	0.223	0	-0.468	-0.33	0.02	0.26	0	0
chr9	24726254	24726254	G	T	Tbx20	0	0	0	0.1	-0.77	0	0	0	0	0	0.485	-0.267	0	0.02	0.21	0	0
chr9	24726278	24726278	T	A	Tbx20	0	-33.62	-25.43	4.81	7.23	0	0	0	0	0.546	0.338	0	0	0	0.79	0	0
chr9	24726287	24726287	T	C	Tbx20	0	-0.68	-3.89	4.81	5.01	0	0	0	0	0	0	-0.249	-0.441	0.21	0.6	0	0
chr9	24726326	24726326	0	TG	Tbx20	0	0	0	4.29	3.93	0	0	0	0	0.254	0.254	0	0	0.02	0.51	0	0
chr9	24726330	24726330	A	G	Tbx20	0	0	0	4.29	3.73	0	0	0	0	0	0	-0.538	0	0.02	0.49	0	0
chr9	24726345	24726345	0	GC	Tbx20	0	-3.77	-8.39	4.29	-5.5	0	0	0	0	0	0	-0.586	-0.622	0.06	0.02	0	0
chr9	24726347	24726347	C	T	Tbx20	0	-3.77	-11.95	0	0	0	0	0	0	0	0	-0.546	-0.586	0.02	0	0	0
chr9	24726479	24726479	G	A	Tbx20	0	-26.46	-18.71	0	0	0	0	0	0	0	0	-0.323	-0.301	0.02	0	0	0
chr9	24726597	24726597	C	T	Tbx20	0	-21.01	-29.19	-1.73	-10.48	0	0	0	0	0.175	0	-0.409	0	0	0.01	0	0
chr9	24726613	24726613	C	T	Tbx20	0	2.01	-6.18	3.58	3.78	0	0	0	0	0	0	-0.566	-0.456	0.07	0.52	0	0
chr9	24726619	24726619	C	T	Tbx20	0	0	0	3.58	3.55	0	0	0	0	0.406	0	0	-0.488	0.02	0.49	0	0
chr9	24726655	24726655	G	A	Tbx20	0	0	0	0.39	1.45	0	0	0	0	0.414	0	0	-0.636	0.02	0.38	0	0
chr9	24726866	24726866	A	G	Tbx20	0	0	0	6.71	6.51	0	0	0	0	0.265	0.231	-1.061	-0.881	0.02	0.69	0	0
chr9	24726926	24726959	ACACACAGAGAGAGAGAGAGAGAGAGAGAGAGAG	0	Tbx20	0	0.72	0.72	-1.57	0.55	0	0	0	0	0.164	0.206	-0.177	-0.177	0.57	0.34	0	0
chr9	24727009	24727009	T	G	Tbx20	0	0	0	0.55	1.47	0	0	0	0	0.664	0.576	0	-0.363	0.02	0.37	0	0
chr9	24727010	24727010	C	A	Tbx20	0	-8.33	-0.68	0.55	3.38	0	0	0	0	0.664	0.187	0	0	0.71	0.56	0	0
chr9	24727013	24727019	TCACTGG	0	Tbx20	0	-6.22	-6.65	0.55	-3.81	0	0	0	0	0.664	0.664	-0.143	0	0.15	0.07	0	0
chr9	24727032	24727034	CTT	0	Tbx20	0	0	0	-21.24	-20.03	0	0	0	0	1.034	0.565	0	0	0.02	0	0	0
chr9	24727058	24727058	C	T	Tbx20	0	-0.01	-8.19	-9.24	-10.07	0	0	0	0	0.366	0.101	0	-0.166	0.04	0.02	0	0
chr9	24727198	24727198	G	T	Tbx20	0	0	0	-6.2	-10.82	0	0	0	0	0.207	0.922	-0.112	0	0.02	0.01	0	0
chr9	24727224	24727224	C	G	Tbx20	0	0	0	0.96	3.04	0	0	0	0	0.168	0.445	-0.68	-0.608	0.02	0.52	0	0
chr9	24727270	24727270	C	T	Tbx20	0	-5.3	-13.48	-3.16	-4.01	0	0	0	0	0.247	0	-0.477	-0.716	0.01	0.09	0	0
chr9	24727296	24727296	C	T	Tbx20	0	0	0	-9.09	-3.88	0	0	0	0	0.576	0.176	0	-0.218	0.02	0.17	0	0
chr9	24727433	24727433	G	C	Tbx20	0	0	0	4.39	3.02	0	0	0	0	0	0.228	-0.379	0	0.02	0.42	0	0
chr9	24727474	24727474	G	A	Tbx20	0	-14.85	-15.04	0	0	0	0	0	0	0	0.352	-0.265	0	0.02	0	0	0
chr9	24727526	24727526	G	0	Tbx20	0	0	0	0.14	-1.85	0	0	0	0	0	0	-0.405	-0.353	0.02	0.14	0	0
chr9	24727557	24727557	T	C	Tbx20	0	2.5	6.14	0.62	1.22	0	0	0	0	0.384	0	-0.255	-0.286	0.9	0.35	0	0
chr9	24727592	24727592	G	A	Tbx20	0	-20.29	-12.53	-7.9	-7.77	0	0	0	0	0.331	0	-0.223	0	0.1	0.04	0	0
chr9	24727617	24727617	T	G	Tbx20	0	-2.87	0.55	-11.22	-11.15	0	0	0	0	0.614	0.984	0	0	0.66	0.01	0	0
chr9	24727635	24727638	TTAA	0	Tbx20	0	0	0	-0.18	0.97	0	0	0	0	0	0	-0.642	-0.444	0.02	0.35	0	0
chr9	24727665	24727665	A	C	Tbx20	0	-15.15	-22.8	-5.06	-8.44	0	0	0	0	0.622	0	0	-0.113	0	0.02	0	0
chr9	24727779	24727779	T	C	Tbx20	0	-16.76	-5.73	-5.09	-11.88	0	0	0	0	0.551	0.513	0	-0.684	0.49	0.01	0	0
chr9	24727916	24727916	G	A	Tbx20	0	-20.63	-12.87	2.5	1.4	0	0	0	0	0.598	0.614	-0.233	-0.237	0.09	0.32	0	0
chr9	24728497	24728497	A	G	Tbx20	0	-12.59	-12.85	2.86	2.48	0	0	0	0	0.354	0.52	-0.373	0	0.03	0.41	0	0
chr9	24728522	24728522	A	G	Tbx20	0	-0.08	1.22	2.06	1.05	0	0	0	0	0	0	-0.546	0	0.64	0.3	0	0
chr9	24728547	24728547	C	G	Tbx20	0	0	0	-1.51	-0.07	0	0	0	0	0	0	-0.238	-0.414	0.02	0.29	0	0
chr9	24728552	24728552	G	A	Tbx20	0	0	0	-1.51	-1.82	0	0	0	0	0.444	0	0	-0.268	0.02	0.17	0	0
chr9	24728583	24728583	A	T	Tbx20	0	-8.64	-6.92	-2.4	-3.52	0	0	0	0	0.245	0	-0.367	-0.557	0.18	0.1	0	0
chr9	24728633	24728633	T	G	Tbx20	0	-11.1	-9.81	-4.53	-12.57	0	0	0	0	0	0.418	-0.579	0	0.09	0	0	0
chr9	24728942	24728942	A	G	Tbx20	0	0	0	3.57	4.57	0	0	0	0	0	0	-1.061	-0.561	0.02	0.59	0	0
chr9	24728943	24728943	A	G	Tbx20	0	0	0	3.57	3.49	0	0	0	0	0	0.436	-1.061	-0.363	0.02	0.49	0	0
chr9	24728947	24728947	A	G	Tbx20	0	0	0	3.57	3.84	0	0	0	0	0	0	-0.371	-0.777	0.02	0.52	0	0
chr9	24728964	24728964	G	A	Tbx20	0	0	0	-2.48	-3.02	0	0	0	0	0.207	0	-0.283	-0.497	0.02	0.12	0	0
chr9	24729670	24729670	C	T	Tbx20	0	0	0	-5.39	-1.01	0	0	0	0	0.077	0	-0.461	-0.727	0.02	0.3	0	0
chr9	24729711	24729711	0	A	Tbx20	0	0	0	4.32	4.91	0	0	0	0	0.235	0	-0.444	-0.444	0.02	0.61	0	0
chr9	24729726	24729726	T	C	Tbx20	0	0	0	4.32	3.06	0	0	0	0	0	0.795	-0.52	-0.359	0.02	0.43	0	0
chr9	24729800	24729800	G	A	Tbx20	0	0	0	0	0	0	0	0	0	0.281	0.245	0	-0.453	0.02	0	0	0
chr9	24729811	24729811	A	C	Tbx20	0	0.3	-7.35	1.71	4.84	0	0	0	0	0	0.428	-0.812	-0.629	0.06	0.67	0	0
chr9	24729826	24729826	A	G	Tbx20	0	-8.25	-16	1.71	0.97	0	0	0	0	0	0.121	0	-0.258	0.01	0.3	0	0
chr9	24729848	24729848	A	G	Tbx20	0	0	0	0	0	0	0	0	0	0	0.265	-0.375	-0.335	0.02	0	0	0
chr9	24729874	24729874	C	G	Tbx20	0	0	0	0.34	1.07	0	0	0	0	0	0	-0.861	-0.435	0.02	0.34	0	0
chr9	24729927	24729927	C	G	Tbx20	0	-12.81	-17.31	0	0	0	0	0	0	0	0	-0.355	0	0.01	0	0	0
chr9	24729953	24729953	G	A	Tbx20	0	-8.65	-0.9	-19.18	-18.48	0	0	0	0	0.298	0	0	-0.323	0.7	0	0	0
chr9	24730026	24730026	C	T	Tbx20	0	-9.62	-7.7	-7.7	-4.54	0	0	0	0	0.386	0	-0.404	-0.647	0.15	0.12	0	0
chr9	24730051	24730051	T	A	Tbx20	0	0	0	-2.84	-2.05	0	0	0	0	0	0	-0.52	-0.49	0.02	0.18	0	0
chr9	24730133	24730133	G	C	Tbx20	0	-3.09	7.68	-23.42	-15.36	0	0	0	0	0.323	0	-0.155	-0.374	0.97	0.01	0	0
chr9	24730136	24730140	ACTGA	0	Tbx20	0	-3.09	-7.33	4.15	-7.4	0	0	0	0	0.323	0	-0.321	-0.228	0.08	0.01	0	0
chr9	24730295	24730295	A	C	Tbx20	0	-17.28	-8.6	3.85	3.79	0	0	0	0	0	0	-0.323	-0.238	0.25	0.51	0	0
chr9	24730307	24730307	G	A	Tbx20	0	0	0	-7.44	-7.28	0	0	0	0	0.373	0	0	-0.419	0.02	0.04	0	0
chr9	24730358	24730358	T	C	Tbx20	0	0	0	0	0	0	0	0	0	0	0.123	-0.4	-0.321	0.02	0	0	0
chr9	24730359	24730359	A	T	Tbx20	0	0	0	0	0	0	0	0	0	0	0	-0.4	-0.44	0.02	0	0	0
chr9	24730382	24730382	A	T	Tbx20	0	0	0	-7.94	-8.19	0	0	0	0	0	0	-0.379	-0.194	0.02	0.03	0	0
chr9	24730424	24730424	C	T	Tbx20	0	0	0	-4.3	-6.13	0	0	0	0	0.128	0.424	-0.377	0	0.02	0.05	0	0
chr9	24730590	24730590	A	G	Tbx20	0	-8.23	-15.98	1.7	1.24	0	0	0	0	0.215	0	-0.543	-0.4	0.01	0.33	0	0
chr9	24730598	24730598	A	C	Tbx20	0	-3.3	5.2	-2.36	-10.21	0	0	0	0	0	0	-0.489	-0.549	0.93	0.01	0	0
chr9	24730607	24730607	C	T	Tbx20	0	2.6	3.68	-2.36	-3.46	0	0	0	0	0	0.561	-0.48	-0.262	0.77	0.1	0	0
chr9	24730664	24730664	A	G	Tbx20	0	-2.69	-7.12	-23.19	-22.01	0	0	0	0	0.284	0.536	-0.224	0	0.09	0	0	0
chr9	24730710	24730710	0	A	Tbx20	0	0	0	1.44	1.44	0	0	0	0	0	0	-0.49	-0.725	0.02	0.35	0	0
chr9	24730723	24730723	0	ATA	Tbx20	0	0	0	0	0	0	0	0	0	0.354	0	-0.343	-0.477	0.02	0	0	0
chr9	24730730	24730730	0	TTA	Tbx20	0	0	0	0	0	0	0	0	0	0	0	-0.542	-0.52	0.02	0	0	0
chr9	24730801	24730801	0	TTTTG	Tbx20	0	0	0	-7.4	-8.12	0	0	0	0	0	0	-0.255	-0.255	0.02	0.03	0	0
chr9	24730923	24730923	A	G	Tbx20	0	0	0	5.73	5.97	0	0	0	0	0	0.417	-0.283	-0.629	0.02	0.67	0	0
chr9	24730950	24730950	G	A	Tbx20	0	0	0	0	0	0	0	0	0	0.416	0	-0.299	-0.539	0.02	0	0	0
chr9	24730989	24730989	A	T	Tbx20	0	5.96	-2.22	-1.71	0.09	0	0	0	0	0	0.39	-0.505	0	0.18	0.31	0	0
chr9	24731060	24731060	A	G	Tbx20	0	4.53	-3.23	0.18	-0.09	0	0	0	0	0	0	-0.564	-0.488	0.15	0.25	0	0
chr9	24731080	24731085	CAGGGT	0	Tbx20	0	0	0	0.12	0.75	0	0	0	0	0.317	0	-0.438	-0.435	0.02	0.32	0	0
chr9	24731146	24731146	A	C	Tbx20	0	-16.29	-20.34	0	0	0	0	0	0	0	0	-0.477	0	0	0	0	0
chr9	24731163	24731163	T	C	Tbx20	0	0	0	0.97	-7.25	0	0	0	0	0	0.358	-0.192	-0.084	0.02	0.02	0	0
chr9	24731346	24731346	C	G	Tbx20	0	-6.82	-15.09	3.27	4.2	0	0	0	0	0.686	0.675	-0.642	-0.599	0.01	0.57	0	0
chr9	24731545	24731545	T	G	Tbx20	0	8.77	7.63	-6.28	-4.39	0	0	0	0	0	0	-0.555	0	0.88	0.11	0	0
chr9	24731574	24731574	0	G	Tbx20	0	0	0	-0.77	-0.77	0	0	0	0	0	0	-0.352	-0.328	0.02	0.22	0	0
chr9	24732021	24732021	A	C	Tbx20	0	0	0	-5.24	-7.98	0	0	0	0	0.613	1.034	-0.44	0	0.02	0.03	0	0
chr9	24732031	24732031	T	0	Tbx20	0	0	0	1.62	-4.06	0	0	0	0	0	0.206	-0.659	-0.337	0.02	0.06	0	0
chr9	24732052	24732052	C	T	Tbx20	0	0	0	-3.97	-12.72	0	0	0	0	0.795	0	0	0	0.02	0	0	0
chr9	24732173	24732173	T	C	Tbx20	0	0	0	-1.97	-1.17	0	0	0	0	0.157	0.326	-0.855	-0.241	0.02	0.22	0	0
chr9	24732326	24732326	T	A	Tbx20	0	1.82	2.53	-11.48	-10.86	0	0	0	0	0	0	0	0	0.7	0.02	0	0
chr9	24732390	24732390	A	G	Tbx20	0	0	0	3.43	1.88	0	0	0	0	0	0	-0.486	-0.211	0.02	0.34	0	0
chr9	24732410	24732410	A	G	Tbx20	0	-11.2	-14.44	2.15	1.5	0	0	0	0	0.189	0.952	-0.529	-0.318	0.02	0.34	0	0
chr9	24732438	24732438	C	T	Tbx20	0	0	0	5.62	5.53	0	0	0	0	0	0	-0.326	-0.551	0.02	0.63	0	0
chr9	24732455	24732455	G	A	Tbx20	0	-8.93	-11.52	1.34	1.12	0	0	0	0	0	0	-0.233	-0.409	0.04	0.32	0	0
chr9	24732694	24732694	T	0	Tbx20	0	0	0	-8.99	-8.95	0	0	0	0	0.795	0.795	0	0	0.02	0.03	0	0
chr9	24732708	24732708	T	C	Tbx20	0	0	0	-8.99	-8.51	0	0	0	0	0	0	0	-0.303	0.02	0.03	0	0
chr9	24732866	24732866	G	A	Tbx20	0	0	0	-6.6	-5.02	0	0	0	0	0.408	0.279	0	-0.216	0.02	0.09	0	0
chr9	24733148	24733171	CTTCCTTTCTTTCTTTCTTTCTTT	0	Tbx20	0	0	0	-21.1	-21.1	0	0	0	0	0.795	0.565	-0.141	-0.141	0.02	0	0	0
chr9	24734575	24734575	A	T	Tbx20	0	-1.6	0.63	2.01	-3.71	0	0	0	0	0	0	-0.486	-0.542	0.63	0.06	0	0
chr9	24734687	24734687	T	C	Tbx20	0	0	0	-1.26	-0.04	0	0	0	0	0.121	0.422	-0.894	-0.276	0.02	0.29	0	0
chr9	24734698	24734698	T	C	Tbx20	0	-32.96	-24.78	-1.26	-4.18	0	0	0	0	0.426	0.271	0	-0.467	0	0.07	0	0
chr9	24734713	24734713	G	A	Tbx20	0	-0.04	-2.31	-0.15	-0.37	0	0	0	0	0.337	0.174	0	0	0.31	0.24	0	0
chr9	24734728	24734728	A	G	Tbx20	0	2.7	-5.06	-0.15	-0.09	0	0	0	0	0	0.128	-0.347	-0.371	0.1	0.26	0	0
chr9	24734778	24734778	C	T	Tbx20	0	-2.05	-13.71	-3	-3.15	0	0	0	0	0	0.254	-0.434	0	0.01	0.12	0	0
chr9	24734802	24734802	C	A	Tbx20	0	0	0	-2.87	-0.63	0	0	0	0	0.408	0	0	-0.583	0.02	0.27	0	0
chr9	24734833	24734833	G	A	Tbx20	0	-19.48	-17.06	-5.32	-5.43	0	0	0	0	0.693	0.595	0	-0.2	0.02	0.07	0	0
chr9	24734838	24734838	C	T	Tbx20	0	0	0	-0.71	-2.25	0	0	0	0	0.682	0.351	-0.346	-0.424	0.02	0.14	0	0
chr9	24734842	24734846	GATAG	0	Tbx20	0	3.23	3.23	-0.71	-5.61	0	0	0	0	0.417	0	-0.346	-0.346	0.72	0.04	0	0
chr9	24734873	24734873	0	TCCCT	Tbx20	0	1.44	-5.87	-2.09	-2.09	0	0	0	0	0.363	0.561	-0.374	-0.373	0.08	0.16	0	0
chr9	24734933	24734933	C	T	Tbx20	0	0	0	-15.37	-7.41	0	0	0	0	0.101	0	-0.19	0	0.02	0.09	0	0
chr9	24735048	24735052	AAACT	0	Tbx20	0	-6.55	-5.08	-10.39	-9.39	0	0	0	0	0.316	0	-0.381	-0.381	0.26	0.03	0	0
chr9	24735111	24735111	G	A	Tbx20	0	0	0	-15.61	-13.39	0	0	0	0	0.551	0.309	0	-0.316	0.02	0.01	0	0
chr9	24735113	24735113	T	C	Tbx20	0	0	0	-6.69	-7.05	0	0	0	0	0.551	0.626	0	0	0.02	0.04	0	0
chr9	24735206	24735206	G	A	Tbx20	0	0	0	2.34	2.75	0	0	0	0	0	0	-0.354	-0.507	0.02	0.45	0	0
chr9	24735228	24735228	G	A	Tbx20	0	-31.64	-23.89	-5.23	-4.57	0	0	0	0	0.134	0.454	0	0	0.01	0.09	0	0
chr9	24735380	24735380	C	T	Tbx20	0	-2.74	2.02	0	0	0	0	0	0	0	0.545	-0.35	0	0.77	0	0	0
chr9	24735410	24735410	T	A	Tbx20	0	0	0	0.18	1.82	0	0	0	0	0.282	0	0	0	0.02	0.42	0	0
chr9	24736127	24736127	C	T	Tbx20	0	-3.27	-11.45	4.86	-3.89	0	0	0	0	0	0	-0.812	-0.503	0.02	0.04	0	0
chr9	24736180	24736180	G	A	Tbx20	0	0	0	0	0	0	0	0	0	0	0	-0.561	-0.463	0.02	0	0	0
chr9	24736390	24736390	A	G	Tbx20	0	-23.13	-19.35	0	0	0	0	0	0	0	0	-0.322	-0.302	0.01	0	0	0
chr9	24736476	24736476	0	TATGTGTGTGTGTGTGTGTGTGTGTGTG	Tbx20	0	0	0	2.4	2.16	0	0	0	0	0	0	-0.52	0	0.02	0.39	0	0
chr9	24736498	24736498	A	G	Tbx20	0	1.58	-6.18	0	0	0	0	0	0	0.538	0.725	0	0	0.07	0	0	0
chr9	24736503	24736503	C	A	Tbx20	0	0	0	0	0	0	0	0	0	0.725	0.536	0	0	0.02	0	0	0
chr9	24736514	24736514	G	T	Tbx20	0	0	0	0	0	0	0	0	0	0	0	-0.364	-0.542	0.02	0	0	0
chr9	24736689	24736689	T	C	Tbx20	0	-10.16	-1.98	7.72	7.66	0	0	0	0	0.507	0.532	-0.599	-0.371	0.65	0.76	0	0
chr9	24736691	24736691	G	A	Tbx20	0	0	0	7.72	8.23	0	0	0	0	0.647	0.164	0	0	0.02	0.8	0	0
chr9	24736750	24736750	A	G	Tbx20	0	0	0	0	0	0	0	0	0	0.388	0.401	0	-0.231	0.02	0	0	0
chr9	24736787	24736787	A	G	Tbx20	0	0	0	0	0	0	0	0	0	0	0	0	-0.393	0.02	0	0	0
chr9	24736794	24736794	A	G	Tbx20	0	0	0	0	0	0	0	0	0	0	0	-0.422	-0.329	0.02	0	0	0
chr9	24737368	24737368	C	T	Tbx20	0	0	0	7.27	7.93	0	0	0	0	0.264	0.284	0	-0.396	0.02	0.79	0	0
chr9	24737547	24737547	A	G	Tbx20	0	0	0	0	0	0	0	0	0	0.101	0.359	-0.259	0	0.02	0	0	0
chr9	24737724	24737724	T	C	Tbx20	0	-6.86	3.55	3.25	1.1	0	0	0	0	0	0.389	-0.53	-0.53	0.91	0.28	0	0
chr9	24738334	24738334	T	C	Tbx20	0	0	0	-0.04	1.14	0	0	0	0	0	0.482	-0.772	-0.227	0.02	0.36	0	0
chr9	24738362	24738362	C	T	Tbx20	0	0	0	-0.77	-2.07	0	0	0	0	0.51	0	0	0	0.02	0.15	0	0
chr9	24738404	24738404	T	G	Tbx20	0	0	0	0	0	0	0	0	0	0.417	0.263	0	-0.258	0.02	0	0	0
chr9	24738405	24738405	C	T	Tbx20	0	0	0	0	0	0	0	0	0	0.417	0	0	-0.382	0.02	0	0	0
chr9	24738448	24738448	G	A	Tbx20	0	0	0	-4.3	-3.51	0	0	0	0	0	0.31	-0.181	-0.641	0.02	0.12	0	0
chr9	24738547	24738547	C	T	Tbx20	0	-6.71	-0.05	-4.99	-5.08	0	0	0	0	0	0	-0.246	-0.292	0.72	0.08	0	0
chr9	24738611	24738611	G	A	Tbx20	0	0	0	2.54	2.03	0	0	0	0	0	0	0	-0.602	0.02	0.38	0	0
chr9	24738630	24738633	GTGA	0	Tbx20	0	0	0	0	0	0	0	0	0	0	0	-0.538	-0.564	0.02	0	0	0
chr9	24738701	24738701	G	A	Tbx20	0	-22.63	-18.8	-1.67	-1.68	0	0	0	0	0	0	-0.879	-0.678	0.01	0.18	0	0
chr9	24738712	24738712	G	A	Tbx20	0	0	0	-1.67	-0.14	0	0	0	0	0.403	0.426	-0.36	0	0.02	0.29	0	0
chr9	24738865	24738865	C	T	Tbx20	0	0	0	-1.19	-0.66	0	0	0	0	0.675	0.795	0	0	0.02	0.24	0	0
chr9	24738909	24738909	T	0	Tbx20	0	0	0	0	0	0	0	0	0	0	0	-0.599	-0.599	0.02	0	0	0
chr9	24739068	24739068	G	T	Tbx20	0	-3.84	-4.64	0	0	0	0	0	0	0	0	-0.682	-0.813	0.22	0	0	0
chr9	24739171	24739171	G	C	Tbx20	0	-28.23	-19.95	7.09	4.75	0	0	0	0	0.263	0.246	0	-0.311	0.02	0.52	0	0
chr9	24739204	24739204	C	G	Tbx20	0	-22.58	-30.85	6.06	6.5	0	0	0	0	0	0	-0.421	-0.78	0	0.71	0	0
chr9	24739262	24739262	T	G	Tbx20	0	0	0	0	0	0	0	0	0	0	0	-0.494	-0.488	0.02	0	0	0
chr9	24739275	24739275	T	0	Tbx20	0	0	0	-3.15	-3.49	0	0	0	0	0	0	-0.465	-0.465	0.02	0.11	0	0
chr9	24739655	24739655	A	0	Tbx20	0	0	0	8.75	8.44	0	0	0	0	0	0	-0.436	-0.436	0.02	0.79	0	0
chr9	24740182	24740182	A	C	Tbx20	0	0	0	0	0	0	0	0	0	0.348	0.322	0	-0.392	0.02	0	0	0
chr9	24740208	24740208	C	T	Tbx20	0	0.78	-11.66	7.81	6.87	0	0	0	0	0	0	-0.428	-0.622	0.01	0.7	0	0
chr9	24741391	24741391	G	A	Tbx20	0	-9.24	-10.37	0	0	0	0	0	0	0.445	0	-0.207	-0.303	0.06	0	0	0
chr9	24741513	24741513	C	T	Tbx20	0	-5.92	-17.84	7.52	7.08	0	0	0	0	0.444	0.158	0	-0.555	0	0.72	0	0
chr9	24741545	24741545	C	T	Tbx20	0	-2.36	-10.55	2.9	0.23	0	0	0	0	0.479	0.212	-0.177	-0.307	0.02	0.22	0	0
chr9	24741724	24741727	CACG	0	Tbx20	0	0.78	-1.13	0	0	0	0	0	0	0.311	0.125	-0.174	-0.599	0.39	0	0	0
chr9	24741777	24741777	G	A	Tbx20	0	-10.44	-12.96	0.25	-0.08	0	0	0	0	0.586	0.142	0	-0.279	0.02	0.25	0	0
chr9	24741780	24741780	T	A	Tbx20	0	-11.84	-3.66	0.25	1.78	0	0	0	0	0.613	0.215	0	-0.667	0.54	0.41	0	0
chr9	24742916	24742916	0	ACACACACACAC	Tbx20	0	0.93	0.28	11.33	10.49	0	0	0	0	0.142	0	-0.323	-0.177	0.52	0.87	0	0
chr9	24742920	24742920	G	C	Tbx20	0	-7.67	-1.13	11.33	10.49	0	0	0	0	0	0	-0.091	-0.267	0.65	0.87	0	0
chr9	24744226	24744226	A	G	Tbx20	0	-14.17	-21.92	-23.67	-19.21	0	0	0	0	0.516	0.507	0	-0.448	0	0	0	0
chr9	24744255	24744255	A	G	Tbx20	0	-16.92	-24.67	0	0	0	0	0	0	0	0	0	-0.287	0	0	0	0
chr9	24744919	24744919	T	C	Tbx20	0	-1.09	-9.62	9.01	9.3	0	0	0	0	0.445	0.251	0	0	0.03	0.84	0	0
chr9	24745032	24745032	T	C	Tbx20	0	0	0	-1.53	-3.82	0	0	0	0	0.537	0.343	-0.436	-0.848	0.02	0.08	0	0
chr9	24745142	24745142	T	A	Tbx20	0	-5.81	-22.41	-2.94	-1.51	0	0	0	0	0.472	0.473	0	0	0	0.21	0	0
chr9	24746260	24746260	T	C	Tbx20	0	-11.04	-2.86	0.16	-3.38	0	0	0	0	0	0	-0.534	-0.477	0.59	0.08	0	0
chr9	24746376	24746376	T	C	Tbx20	0	-32.88	-24.7	-0.13	0.73	0	0	0	0	0.125	0.64	0	0	0	0.32	0	0
chr9	24746583	24746583	G	A	Tbx20	0	0	0	0	0	0	0	0	0	0.474	0.373	0	0	0.02	0	0	0
chr9	24746657	24746657	C	G	Tbx20	0	-1.18	-10.69	-2.04	-2.09	0	0	0	0	0.323	0	-0.161	-0.297	0.02	0.16	0	0
chr9	24746663	24746663	A	G	Tbx20	0	0.92	-6.83	-2.04	-2.34	0	0	0	0	0	0.18	-0.369	-0.197	0.06	0.15	0	0
chr9	24746781	24746781	C	T	Tbx20	0	-10.59	-7.02	6.17	6.18	0	0	0	0	0	0.314	-0.236	-0.457	0.21	0.68	0	0
chr9	24746782	24746782	A	G	Tbx20	0	-10.59	-9.23	6.17	6.46	0	0	0	0	0	0.41	-0.236	0	0.1	0.7	0	0
chr9	24746783	24746783	A	T	Tbx20	0	-10.59	-18.78	6.17	4.78	0	0	0	0	0	0.434	-0.236	0	0	0.55	0	0
chr9	24747195	24747195	T	A	Tbx20	0	0	0	0	0	0	0	0	0	0	0	-0.725	-0.78	0.02	0	0	0
chr9	24747345	24747345	C	T	Tbx20	0	0	0	2	-6.75	0	0	0	0	0	0	-0.444	-0.374	0.02	0.02	0	0
chr9	24747406	24747406	T	C	Tbx20	0	0	0	3.04	3.04	0	0	0	0	0	0.449	-0.491	-0.404	0.02	0.46	0	0
chr9	24747417	24747417	A	T	Tbx20	0	-9.84	-9.07	-5.79	-6.59	0	0	0	0	0	0.316	-0.436	-0.179	0.1	0.05	0	0
chr9	24747418	24747418	C	T	Tbx20	0	-3.15	-3.49	-5.79	-14.54	0	0	0	0	0	0	-0.436	-0.616	0.29	0	0	0
chr9	24747423	24747423	C	T	Tbx20	0	-3.15	-11.34	-3.78	-1.77	0	0	0	0	0	0	-0.812	-0.503	0.02	0.21	0	0
chr9	24747582	24747582	G	A	Tbx20	0	-8.59	-0.84	6.99	6.77	0	0	0	0	0.332	0	0	-0.255	0.7	0.71	0	0
chr9	24747634	24747634	A	G	Tbx20	0	0	0	4.31	4.62	0	0	0	0	0	0	-0.753	0	0.02	0.58	0	0
chr9	24747650	24747650	A	T	Tbx20	0	0	0	0	0	0	0	0	0	0.647	0.651	0	-0.206	0.02	0	0	0
chr9	24747719	24747719	C	T	Tbx20	0	-2.23	-8.84	4.46	2.95	0	0	0	0	0.388	0	-0.177	-0.346	0.04	0.41	0	0
chr9	24747740	24747740	G	A	Tbx20	0	-13.43	-5.68	0	0	0	0	0	0	0.585	0.423	-0.183	-0.382	0.39	0	0	0
chr9	24747776	24747776	A	G	Tbx20	0	0	1.99	3.29	3.08	0	0	0	0	0.206	0.532	-0.06	0	0.94	0.46	0	0
chr9	24747777	24747777	G	T	Tbx20	0	0	-0.5	3.29	2.37	0	0	0	0	0.206	0	0	-0.307	0.86	0.39	0	0
chr9	24747783	24747783	A	G	Tbx20	0	-8.03	-12.19	0	0	0	0	0	0	0	0.789	-0.371	0	0.02	0	0	0
chr9	24747863	24747863	0	TTTC	Tbx20	0	0	0	-31.75	-23.71	0	0	0	0	0.303	0.795	0	0	0.02	0	0	0
chr9	24747898	24747898	C	T	Tbx20	0	0	0	4.59	4.17	0	0	0	0	0.416	0	-0.284	-0.425	0.02	0.53	0	0
chr9	24747904	24747904	T	0	Tbx20	0	0	0	4.59	4.59	0	0	0	0	0	0	0	0	0.02	0.57	0	0
chr9	24747964	24747964	T	C	Tbx20	0	-3.66	4.53	1.22	0.88	0	0	0	0	0	0	-0.627	-0.827	0.91	0.31	0	0
chr9	24747972	24747972	A	C	Tbx20	0	-15.24	2.78	1.22	-5.52	0	0	0	0	0	0	-0.532	-0.7	0.96	0.03	0	0
chr9	24748059	24748059	G	A	Tbx20	0	-34.11	-26.36	0	0	0	0	0	0	0.337	0.246	-0.181	0	0	0	0	0
chr9	24748060	24748060	C	T	Tbx20	0	0	0	0	0	0	0	0	0	0.337	0	-0.181	0	0.02	0	0	0
chr9	24748065	24748065	A	G	Tbx20	0	-7.35	-15.1	0	0	0	0	0	0	0.184	0.337	-0.236	0	0.01	0	0	0
chr9	24748083	24748083	C	T	Tbx20	0	0	0	-14.49	-6.54	0	0	0	0	0.277	0.187	0	-0.677	0.02	0.11	0	0
chr9	24748097	24748097	A	T	Tbx20	0	0	0	-0.03	-3.08	0	0	0	0	0	0	-0.59	-0.77	0.02	0.09	0	0
chr9	24748098	24748098	A	G	Tbx20	0	0	0	-0.03	0.29	0	0	0	0	0	0	-0.59	-0.255	0.02	0.29	0	0
chr9	24748100	24748100	T	C	Tbx20	0	-9.23	-0.12	-0.03	1.07	0	0	0	0	0	0	-0.59	-0.196	0.77	0.35	0	0
chr9	24748104	24748104	C	G	Tbx20	0	-9.23	-17.5	-0.03	0.6	0	0	0	0	0	0	-0.279	0	0	0.31	0	0
chr9	24748164	24748164	C	T	Tbx20	0	0	0	0.46	0.62	0	0	0	0	0.372	0	0	-0.564	0.02	0.3	0	0
chr9	24748196	24748196	T	C	Tbx20	0	0	0	3.67	2.19	0	0	0	0	0	0.317	-0.445	0	0.02	0.36	0	0
chr9	24748203	24748203	C	A	Tbx20	0	-3.26	-11.76	3.67	4.22	0	0	0	0	0.574	0.309	0	0	0.02	0.56	0	0
chr9	24748204	24748204	G	A	Tbx20	0	-3.26	-5.37	3.67	5.19	0	0	0	0	0.574	0	0	0	0.17	0.65	0	0
chr9	24748211	24748211	G	A	Tbx20	0	0	0	3.67	4.54	0	0	0	0	0.231	0.265	-0.537	-0.753	0.02	0.59	0	0
chr9	24748248	24748248	A	T	Tbx20	0	3.16	-5.02	5.44	5.43	0	0	0	0	0	0.414	-0.438	-0.328	0.09	0.63	0	0
chr9	24748309	24748309	A	G	Tbx20	0	1.32	-6.44	-3.5	-2.83	0	0	0	0	0	0.2	-0.703	-0.304	0.07	0.14	0	0
chr9	24748378	24748378	C	T	Tbx20	0	0	0	-12.61	-4.65	0	0	0	0	0.097	0	0	-0.599	0.02	0.18	0	0
chr9	24748546	24748550	AAAAA	0	Tbx20	0	0	0	3.49	3.49	0	0	0	0	0	0	-0.436	-0.436	0.02	0.49	0	0
chr9	24753107	24753107	T	G	Tbx20	0	-10.61	-8.91	-3.12	-0.25	0	0	0	0	0	0	-0.538	-0.497	0.11	0.31	0	0
chr9	24754945	24754945	0	A	Tbx20	0	0	0	6.25	6.25	0	0	0	0	0.286	0.286	0	-0.381	0.02	0.68	0	0
chr9	24755455	24755455	T	C	Tbx20	0	-4.59	2.59	-0.17	0.52	0	0	0	0	0	0	-0.373	-0.786	0.84	0.31	0	0
chr9	24755625	24755625	G	T	Tbx20	0	-18.16	-15.52	-17.77	-9.73	0	0	0	0	0.885	0.363	0	-0.219	0.02	0.05	0	0
chr9	24755682	24755682	C	T	Tbx20	0	-6.79	-4.79	1.02	0.81	0	0	0	0	0.468	0	0	-0.583	0.28	0.3	0	0
chr9	24755814	24755814	A	0	Tbx20	0	-8.31	-8.31	2.75	2.67	0	0	0	0	0	0	-0.78	-0.35	0.11	0.43	0	0
chr9	24756167	24756167	A	G	Tbx20	0	-19.88	-17.96	5.2	5.9	0	0	0	0	0	0	-0.517	-0.253	0.01	0.68	0	0
chr9	24756485	24756487	GGT	0	Tbx20	0	0	0	3.9	1.83	0	0	0	0	0.27	0	-0.737	-0.387	0.02	0.32	0	0
chr9	24758415	24758415	T	G	Tbx20	0	0	0	0.19	2.87	0	0	0	0	0.235	0	-0.503	0	0.02	0.52	0	0
chr9	24759126	24759126	0	TGTGTGTGTGTGTGTG	Tbx20	0	0	0	-2.9	-2.9	0	0	0	0	0	0	-0.39	0	0.02	0.13	0	0
chr9	24759609	24759618	ACACACACAC	0	Tbx20	0	-1.13	-1.13	3.03	3.03	0	0	0	0	0	0	-0.32	-0.32	0.45	0.46	0	0
chr9	24759676	24759676	0	GATAGATAGATA	Tbx20	0	0	0	0	0	0	0	0	0	0.274	0	-0.456	-0.315	0.02	0	0	0
chr9	24760197	24760197	0	AAT	Tbx20	0	0	0	6.45	6.45	0	0	0	0	0	0	-0.674	-0.674	0.02	0.69	0	0
chr9	24761999	24762002	AAGA	0	Tbx20	0	0	0	0	0	0	0	0	0	0.446	0.446	-0.422	-0.422	0.02	0	0	0
chr9	24762446	24762446	0	T	Tbx20	0	0	0	4.33	4.33	0	0	0	0	0	0	-0.78	-0.426	0.02	0.55	0	0
chr9	24764578	24764578	G	A	Tbx20	0	-1.17	-2.28	4.6	4.15	0	0	0	0	0	0	-0.671	-0.433	0.34	0.53	0	0
chr9	24766683	24766683	A	G	Tbx20	0	3.22	4.93	0.05	-0.82	0	0	0	0	0	0.536	-0.538	0	0.83	0.2	0	0
chr9	24770264	24770264	T	C	Tbx20	0	-6.85	-12.94	-15.85	-11.87	0	0	0	0	0.508	0.462	0	0	0.02	0.02	0	0
chr9	24773551	24773551	A	0	Tbx20	0	0	0	8.01	8.01	0	0	0	0	0	0	-0.463	-0.463	0.02	0.78	0	0

## Sheet: Spliceogen gain
#CHR	START	REF	ALT	GENE	donGainP	accGainP
chr9	24730133	G	C	Tbx20	0.97	0.01
chr9	24747972	A	C	Tbx20	0.96	0.03
chr9	24747776	A	G	Tbx20	0.94	0.46
chr9	24730598	A	C	Tbx20	0.93	0.01
chr9	24723281	G	A	Tbx20	0.92	0.54
chr9	24747964	T	C	Tbx20	0.91	0.31
chr9	24737724	T	C	Tbx20	0.91	0.28
chr9	24727557	T	C	Tbx20	0.9	0.35
chr9	24731545	T	G	Tbx20	0.88	0.11
chr9	24742920	G	C	Tbx20	0.65	0.87
chr9	24742916	0	ACACACACACAC	Tbx20	0.52	0.87
chr9	24747777	G	T	Tbx20	0.86	0.39
chr9	24722210	A	G	Tbx20	0.85	0.5
chr9	24755455	T	C	Tbx20	0.84	0.31
chr9	24744919	T	C	Tbx20	0.03	0.84
chr9	24766683	A	G	Tbx20	0.83	0.2
chr9	24721153	A	G	Tbx20	0.02	0.83
chr9	24723742	A	T	Tbx20	0.81	0.33
chr9	24736691	G	A	Tbx20	0.02	0.8
chr9	24724802	A	G	Tbx20	0.02	0.8
chr9	24723047	A	C	Tbx20	0.29	0.8
chr9	24739655	A	0	Tbx20	0.02	0.79
chr9	24737368	C	T	Tbx20	0.02	0.79
chr9	24726278	T	A	Tbx20	0	0.79
chr9	24773551	A	0	Tbx20	0.02	0.78
chr9	24748100	T	C	Tbx20	0.77	0.35
chr9	24735380	C	T	Tbx20	0.77	0
chr9	24730607	C	T	Tbx20	0.77	0.1
chr9	24724434	C	A	Tbx20	0	0.77
chr9	24721512	C	G	Tbx20	0.02	0.77
chr9	24736689	T	C	Tbx20	0.65	0.76
chr9	24724522	A	0	Tbx20	0.02	0.74
chr9	24721756	G	T	Tbx20	0.02	0.74
chr9	24741513	C	T	Tbx20	0	0.72
chr9	24738547	C	T	Tbx20	0.72	0.08
chr9	24734842	GATAG	0	Tbx20	0.72	0.04
chr9	24724793	A	T	Tbx20	0.02	0.72
chr9	24721556	0	A	Tbx20	0.02	0.72
chr9	24747582	G	A	Tbx20	0.7	0.71
chr9	24739204	C	G	Tbx20	0	0.71
chr9	24727010	C	A	Tbx20	0.71	0.56
chr9	24724433	A	G	Tbx20	0	0.71
chr9	24746782	A	G	Tbx20	0.1	0.7
chr9	24740208	C	T	Tbx20	0.01	0.7
chr9	24732326	T	A	Tbx20	0.7	0.02
chr9	24729953	G	A	Tbx20	0.7	0

## Sheet: Splice Junctions
seqnames	start	end	width	strand	Strain	Timepoint
chr9	24725793	24727762	1970	-	129T2/SvEms	E12_5
chr9	24727873	24750311	22439	-	129T2/SvEms	E12_5
chr9	24750389	24758725	8337	-	129T2/SvEms	E12_5
chr9	24758885	24765665	6781	-	129T2/SvEms	E12_5
chr9	24765775	24769652	3878	-	129T2/SvEms	E12_5
chr9	24769818	24770679	862	-	129T2/SvEms	E12_5
chr9	24770930	24773718	2789	-	129T2/SvEms	E12_5
chr9	24725793	24727762	1970	-	QSi5	E12_5
chr9	24727873	24750311	22439	-	QSi5	E12_5
chr9	24750389	24758725	8337	-	QSi5	E12_5
chr9	24758885	24765665	6781	-	QSi5	E12_5
chr9	24765775	24769652	3878	-	QSi5	E12_5
chr9	24769818	24770679	862	-	QSi5	E12_5
chr9	24770930	24773718	2789	-	QSi5	E12_5
chr9	24725793	24727762	1970	-	129T2/SvEms	E14_5
chr9	24727873	24750311	22439	-	129T2/SvEms	E14_5
chr9	24750389	24758725	8337	-	129T2/SvEms	E14_5
chr9	24758885	24765665	6781	-	129T2/SvEms	E14_5
chr9	24765775	24769652	3878	-	129T2/SvEms	E14_5
chr9	24769818	24770679	862	-	129T2/SvEms	E14_5
chr9	24770930	24773718	2789	-	129T2/SvEms	E14_5
chr9	24725793	24727762	1970	-	QSi5	E14_5
chr9	24727873	24750311	22439	-	QSi5	E14_5
chr9	24750389	24758725	8337	-	QSi5	E14_5
chr9	24758885	24765665	6781	-	QSi5	E14_5
chr9	24765775	24769652	3878	-	QSi5	E14_5
chr9	24769818	24770679	862	-	QSi5	E14_5
chr9	24770930	24773718	2789	-	QSi5	E14_5
chr9	24725793	24727762	1970	-	129T2/SvEms	E16_5
chr9	24727873	24750311	22439	-	129T2/SvEms	E16_5
chr9	24750389	24758725	8337	-	129T2/SvEms	E16_5
chr9	24758885	24765665	6781	-	129T2/SvEms	E16_5
chr9	24765775	24769652	3878	-	129T2/SvEms	E16_5
chr9	24769818	24770679	862	-	129T2/SvEms	E16_5
chr9	24770930	24773718	2789	-	129T2/SvEms	E16_5
chr9	24725793	24727762	1970	-	QSi5	E16_5
chr9	24727873	24750311	22439	-	QSi5	E16_5
chr9	24750389	24758725	8337	-	QSi5	E16_5
chr9	24758885	24765665	6781	-	QSi5	E16_5
chr9	24765775	24769652	3878	-	QSi5	E16_5
chr9	24769818	24770679	862	-	QSi5	E16_5
chr9	24770930	24773718	2789	-	QSi5	E16_5

## Sheet: Transcript differences
Transcript	baseMean	log2FoldChange	lfcSE	stat	pvalue	padj	Gene_name
ENSMUST00000179621.1	4859.09	8.70343	0.187919	46.3149	0	0	Gm22513
ENSMUST00000164408.7	625.784	4.00085	0.122549	32.647	8.84112e-234	1.64542e-229	Gm3591
ENSMUST00000029549.15	714.678	3.06666	0.101286	30.2772	2.29067e-201	2.84211e-197	Tpm3
ENSMUST00000120233.1	1307.52	-7.16905	0.246304	-29.1065	2.9701e-186	2.76383e-182	Vcp-rs
ENSMUST00000118928.1	524.015	7.28083	0.263282	27.6541	2.48985e-168	1.54462e-164	Gm13456
ENSMUST00000180867.7	303.917	4.23048	0.152966	27.6564	2.33598e-168	1.54462e-164	Gm3194
ENSMUST00000184247.1	206.105	4.21909	0.154669	27.2783	7.68341e-164	4.0856e-160	Rpl15-ps2
ENSMUST00000170123.1	420.971	3.60818	0.144786	24.9207	4.43345e-137	2.06277e-133	Gm10409
ENSMUST00000163790.1	549.172	3.71355	0.149686	24.809	7.17364e-136	2.96686e-132	Gm3558
ENSMUST00000202887.1	423.04	1.64152	0.0664419	24.7061	9.20488e-135	3.42624e-131	Gm42732
ENSMUST00000086725.5	823.453	7.97864	0.326678	24.4236	9.61119e-132	3.25225e-128	Gm3608
ENSMUST00000135913.1	370.298	2.99596	0.126916	23.6059	3.35239e-123	1.03985e-119	5830417I10Rik
ENSMUST00000164512.7	295.548	3.81494	0.166987	22.8458	1.61067e-115	4.61172e-112	Gm2974
ENSMUST00000180422.1	388.218	8.37975	0.380041	22.0496	9.63341e-108	2.56125e-104	Gm9625
ENSMUST00000073722.5	244.406	6.3338	0.297288	21.3053	1.01392e-100	2.516e-97	Gm10073
ENSMUST00000118533.1	1003.64	-9.96242	0.468528	-21.2632	2.48739e-100	5.7866e-97	Gm15772
ENSMUST00000201493.1	4802.17	1.62114	0.0767772	21.1149	5.80413e-99	1.27083e-95	Gm43197
ENSMUST00000074680.7	1157.99	9.02524	0.455431	19.8169	2.12798e-87	4.40043e-84	Rps3a3
ENSMUST00000092138.6	2158.07	1.1079	0.0560296	19.7736	5.02833e-87	9.85077e-84	Gm21769
ENSMUST00000074072.3	696.11	-9.72388	0.495656	-19.6182	1.08049e-85	2.0109e-82	Gm10260
ENSMUST00000170104.2	394.762	2.13126	0.110418	19.3017	5.19563e-83	9.20913e-80	Gm3411
ENSMUST00000160298.1	8427.29	1.80615	0.0946983	19.0727	4.25579e-81	7.20041e-78	Gm8113
ENSMUST00000170953.2	586.688	-8.5	0.449893	-18.8934	1.29287e-79	2.09232e-76	Rps13
ENSMUST00000117295.1	1239.88	-9.68516	0.514229	-18.8343	3.95048e-79	6.12686e-76	Rps2-ps13
ENSMUST00000108947.2	157.1	-2.8175	0.150936	-18.6669	9.20993e-78	1.37125e-74	Gm14403
ENSMUST00000084149.9	177.378	2.8969	0.156099	18.5581	7.01219e-77	1.00388e-73	Gm13139
ENSMUST00000061322.9	452.05	2.88099	0.156513	18.4074	1.14566e-75	1.57939e-72	Mlf1
ENSMUST00000181033.7	162.475	2.83021	0.153839	18.3972	1.38252e-75	1.83786e-72	Gm26552
ENSMUST00000076373.7	497.432	9.37458	0.514089	18.2353	2.7064e-74	3.47371e-71	Gm8730
ENSMUST00000029654.14	211.954	3.05756	0.168122	18.1865	6.6005e-74	8.18946e-71	Glrb
ENSMUST00000117444.1	629.448	-7.70297	0.423808	-18.1756	8.05196e-74	9.66807e-71	Rpl35a-ps2
ENSMUST00000105733.2	333.742	1.84475	0.104816	17.5999	2.46576e-69	2.86815e-66	Gm13251
ENSMUST00000072359.6	523.342	-9.0371	0.517193	-17.4734	2.2863e-68	2.57881e-65	Tpm3-rs7
ENSMUST00000139760.1	550.005	1.90462	0.109953	17.3221	3.20388e-67	3.5075e-64	Itga6
ENSMUST00000163850.7	153.361	4.81578	0.278648	17.2826	6.35658e-67	6.76013e-64	Gm3636
ENSMUST00000121658.1	2708.73	-14.6977	0.854672	-17.1969	2.80271e-66	2.89785e-63	Gm13394
ENSMUST00000180944.7	78.2845	3.81287	0.22267	17.1234	9.93039e-66	9.98997e-63	Gm26680
ENSMUST00000170480.7	130.642	2.96038	0.173169	17.0953	1.60872e-65	1.57579e-62	Gm3002
ENSMUST00000090973.11	1172	2.36879	0.143555	16.501	3.61063e-61	3.44603e-58	Nes
ENSMUST00000178451.7	585.356	1.8243	0.111757	16.3239	6.67419e-60	6.21067e-57	Gm21092
ENSMUST00000121309.1	1450.22	-13.7838	0.84534	-16.3056	9.00322e-60	8.17361e-57	Gm13370
ENSMUST00000170715.7	978.748	13.5445	0.837388	16.1748	7.60017e-59	6.73556e-56	Rps2
ENSMUST00000075453.8	1311.94	5.62207	0.36168	15.5443	1.73846e-54	1.50486e-51	Rpl21
ENSMUST00000038096.7	128.674	1.88565	0.121906	15.468	5.70159e-54	4.82328e-51	Fn3krp
ENSMUST00000181906.1	94.4518	-2.20392	0.14529	-15.1691	5.66724e-52	4.68769e-49	Cep83os
ENSMUST00000199397.1	157.992	-2.15066	0.143641	-14.9725	1.11141e-50	8.99322e-48	Fam73a
ENSMUST00000030164.7	3450.52	1.70455	0.114188	14.9276	2.17871e-50	1.72544e-47	Vcp
ENSMUST00000029722.6	4799.65	-2.73197	0.184136	-14.8367	8.48293e-50	6.57816e-47	Rps3a1
ENSMUST00000166494.1	135.476	2.20298	0.148649	14.82	1.0881e-49	8.26553e-47	Gm2897
ENSMUST00000194649.1	407.052	2.49829	0.169138	14.7707	2.26275e-49	1.68448e-46	Rpl22l1
ENSMUST00000160694.1	384.829	-11.9057	0.836996	-14.2243	6.47532e-46	4.72597e-43	Nes
ENSMUST00000122051.1	58.3582	3.42755	0.241069	14.2181	7.07025e-46	5.06094e-43	Znf41-ps
ENSMUST00000074245.4	2663	10.975	0.777487	14.116	3.02638e-45	2.12543e-42	Rps3a2
ENSMUST00000081993.1	298.915	11.8094	0.847998	13.9262	4.38933e-44	3.02555e-41	Gm10020
ENSMUST00000098689.5	293.674	9.95273	0.715138	13.9172	4.97865e-44	3.36937e-41	Gm6166
ENSMUST00000177556.7	211.871	4.0057	0.288033	13.9071	5.73532e-44	3.81214e-41	Gm3373
ENSMUST00000209283.1	257.481	11.6077	0.837011	13.8681	9.88995e-44	6.45831e-41	NA
ENSMUST00000015664.4	107.927	3.92593	0.283131	13.8662	1.01569e-43	6.51827e-41	Ctsk
ENSMUST00000170738.2	144.221	4.19825	0.304382	13.7927	2.81982e-43	1.77897e-40	Gm10406
ENSMUST00000136063.1	209.954	1.25188	0.0912111	13.7251	7.1876e-43	4.45895e-40	Csnk2a1
ENSMUST00000133301.7	190.3	-2.00008	0.146188	-13.6815	1.30899e-42	7.98744e-40	Gm14410
ENSMUST00000180143.1	116.563	3.25957	0.23846	13.6693	1.54941e-42	9.30198e-40	Gm3194
ENSMUST00000171706.1	133.617	2.26782	0.167616	13.5299	1.04211e-41	6.15705e-39	Gm3629
ENSMUST00000208748.1	221.761	1.18357	0.0876339	13.5058	1.44546e-41	8.40672e-39	Gm45104
ENSMUST00000146631.1	295.074	-9.81928	0.72753	-13.4967	1.63454e-41	9.36012e-39	Gm7666
ENSMUST00000020681.9	196.644	11.2157	0.837551	13.391	6.82321e-41	3.84809e-38	Slu7
ENSMUST00000183478.1	1294.69	8.92459	0.674444	13.2325	5.69478e-40	3.16375e-37	Rps13-ps1
ENSMUST00000064076.5	234.221	3.77224	0.286227	13.1792	1.15615e-39	6.32854e-37	Tnni3k
ENSMUST00000180035.7	182.88	1.54725	0.119871	12.9076	4.07998e-38	2.20094e-35	Tmem181b-ps
ENSMUST00000184666.7	160.582	-1.6266	0.126573	-12.8511	8.47868e-38	4.50848e-35	Unc13c
ENSMUST00000094028.9	1804.49	-1.33504	0.104993	-12.7155	4.85247e-37	2.54392e-34	Capza1
ENSMUST00000178049.1	967.462	-1.38835	0.109367	-12.6945	6.34289e-37	3.2791e-34	Gm21596
ENSMUST00000029297.5	67.5172	4.28257	0.337545	12.6874	6.94595e-37	3.54167e-34	Slc7a11
ENSMUST00000111706.7	130.597	8.47096	0.66852	12.6712	8.5381e-37	4.29466e-34	Lmntd1
ENSMUST00000061681.7	133.994	10.6675	0.851514	12.5277	5.26666e-36	2.61381e-33	Gm7334
ENSMUST00000178622.2	149.469	-10.5443	0.843137	-12.5061	6.91523e-36	3.38682e-33	Slu7
ENSMUST00000198113.1	97.6478	1.70101	0.136121	12.4962	7.82667e-36	3.73493e-33	Gon4l
ENSMUST00000187461.1	100.8	-2.06404	0.165171	-12.4963	7.81623e-36	3.73493e-33	AV026068
ENSMUST00000088940.5	855.817	0.85047	0.0687265	12.3747	3.58234e-35	1.68787e-32	Tmem181a
ENSMUST00000111721.1	119.595	10.4829	0.851596	12.3097	8.03089e-35	3.73657e-32	Lyrm5
ENSMUST00000029671.8	42.075	4.451	0.362736	12.2706	1.3026e-34	5.98586e-32	Ifi44
ENSMUST00000165619.7	106.846	7.70298	0.62952	12.2363	1.98937e-34	9.0303e-32	Gm3252
ENSMUST00000165744.1	113.873	3.00046	0.24524	12.2348	2.02685e-34	9.08959e-32	Gm3739
ENSMUST00000179569.1	956.815	1.91385	0.159462	12.0019	3.47232e-33	1.53865e-30	Dynlt1b
ENSMUST00000171987.1	51.1729	2.82291	0.237159	11.903	1.14132e-32	4.99791e-30	Gm8050
ENSMUST00000077163.2	177.273	-10.5974	0.892922	-11.8682	1.7319e-32	7.49589e-30	Gm11361
ENSMUST00000061688.9	241.284	1.24964	0.106235	11.763	6.05594e-32	2.59097e-29	Ermard
ENSMUST00000036426.12	1827.88	0.833912	0.0709274	11.7573	6.47962e-32	2.74073e-29	Prss35
ENSMUST00000108940.2	139.346	-1.81056	0.154023	-11.7552	6.64408e-32	2.77872e-29	Gm14403
ENSMUST00000118948.1	107.324	-10.0594	0.857101	-11.7365	8.28393e-32	3.42605e-29	Gm8822
ENSMUST00000174778.7	96.2419	1.50443	0.128936	11.6681	1.85593e-31	7.59136e-29	Gm10499
ENSMUST00000181248.1	503.468	1.03086	0.0884254	11.658	2.08951e-31	8.45389e-29	Gm26804
ENSMUST00000063683.6	197.699	-1.20978	0.10396	-11.637	2.67113e-31	1.06908e-28	Tagap1
ENSMUST00000121456.1	124.846	9.60587	0.830539	11.5658	6.13992e-31	2.43128e-28	Gm14165
ENSMUST00000105238.9	72.5543	9.78706	0.849809	11.5168	1.0859e-30	4.25468e-28	Stat2
ENSMUST00000088765.8	78.101	9.89028	0.859926	11.5013	1.29917e-30	5.03727e-28	Zfp758
ENSMUST00000199878.4	100.979	10.2495	0.892302	11.4866	1.54096e-30	5.91314e-28	Papss1
ENSMUST00000177150.1	67.0644	9.67422	0.843497	11.4692	1.88411e-30	7.15615e-28	AA465934
ENSMUST00000102826.3	129.492	1.94361	0.170137	11.4238	3.18068e-30	1.19587e-27	Ifit2
ENSMUST00000165754.7	156.176	-2.0826	0.182585	-11.4062	3.89331e-30	1.44917e-27	Lztfl1
ENSMUST00000163719.7	32.3334	3.76159	0.330652	11.3763	5.48844e-30	2.02268e-27	Gm8281
ENSMUST00000121906.1	130.469	7.59293	0.670161	11.33	9.32097e-30	3.40142e-27	BC002163
ENSMUST00000056948.9	65.9588	9.64423	0.85456	11.2856	1.54553e-29	5.58522e-27	Gm7887
ENSMUST00000172785.7	174.403	-1.81477	0.161304	-11.2506	2.29948e-29	8.22991e-27	H2-D1
ENSMUST00000139264.1	335.16	1.33502	0.118931	11.2252	3.06854e-29	1.08778e-26	2610005L07Rik
ENSMUST00000122404.1	109.46	5.21533	0.464753	11.2217	3.18979e-29	1.1201e-26	Gm14150
ENSMUST00000105046.3	61.1354	9.49007	0.848116	11.1896	4.58585e-29	1.59528e-26	Hmga1-rs1
ENSMUST00000169242.1	270.301	-2.31452	0.206931	-11.185	4.82937e-29	1.66443e-26	Gm17167
ENSMUST00000164603.7	61.845	9.5475	0.860559	11.0945	1.33362e-28	4.55412e-26	Gm3173
ENSMUST00000181233.1	178.671	-4.56561	0.413588	-11.039	2.47695e-28	8.38155e-26	Rps19-ps6
ENSMUST00000081241.1	81.4977	-9.61227	0.873389	-11.0057	3.58624e-28	1.20259e-25	Gm10039
ENSMUST00000026519.8	368.13	-1.30126	0.118413	-10.9891	4.31049e-28	1.43255e-25	4833420G17Rik
ENSMUST00000170790.7	172.473	1.8391	0.168982	10.8834	1.38322e-27	4.5563e-25	Gm10340
ENSMUST00000140687.1	1464.05	-11.8209	1.10067	-10.7397	6.62526e-27	2.16321e-24	Gm15501
ENSMUST00000186507.1	59.9122	-9.18395	0.858204	-10.7014	1.003e-26	3.2464e-24	Gm6644
ENSMUST00000164544.1	30.4599	4.99476	0.466834	10.6992	1.02646e-26	3.29368e-24	Gm3526
ENSMUST00000152686.1	83.9696	-9.22186	0.862911	-10.6869	1.17188e-26	3.72818e-24	Gm13305
ENSMUST00000121016.2	71.9268	-5.27265	0.497632	-10.5955	3.12747e-26	9.86533e-24	Gm5898
ENSMUST00000154354.1	30.6658	-4.26389	0.406297	-10.4945	9.15373e-26	2.86319e-23	2610507I01Rik
ENSMUST00000147954.1	1308.79	-2.76744	0.264447	-10.465	1.2511e-25	3.8807e-23	Gapdh
ENSMUST00000060477.8	55.9143	-9.0959	0.86939	-10.4624	1.28565e-25	3.95493e-23	Gm5514
ENSMUST00000164523.2	73.7764	-9.00899	0.862864	-10.4408	1.61429e-25	4.92517e-23	Gm5611
ENSMUST00000186214.1	41.2241	-4.0203	0.385234	-10.436	1.69835e-25	5.13952e-23	AV026068
ENSMUST00000096171.11	31.3851	2.70889	0.260078	10.4157	2.10243e-25	6.31101e-23	Gm3383
ENSMUST00000190059.6	164.47	1.77819	0.170749	10.4141	2.13811e-25	6.36678e-23	Tmem181b-ps
ENSMUST00000139045.7	170.951	1.79217	0.17216	10.4099	2.23446e-25	6.60088e-23	Metap1d
ENSMUST00000181157.7	68.0795	2.17575	0.209038	10.4084	2.27058e-25	6.65475e-23	Gm26650
ENSMUST00000210267.1	53.515	-9.00321	0.865339	-10.4043	2.3708e-25	6.89421e-23	NA
ENSMUST00000036374.5	159.073	8.85596	0.85157	10.3996	2.49068e-25	7.18666e-23	Phb
ENSMUST00000142871.1	30.54	-3.40449	0.327976	-10.3803	3.04811e-25	8.72744e-23	4930458D05Rik
ENSMUST00000102545.7	87.0552	10.0064	0.969128	10.3251	5.42399e-25	1.54116e-22	Arhgap11a
ENSMUST00000109060.7	114.141	1.47704	0.143302	10.3072	6.53843e-25	1.84374e-22	Gm14399
ENSMUST00000179155.1	694.657	3.00905	0.292287	10.2948	7.43397e-25	2.08051e-22	Gm24305
ENSMUST00000100687.3	36.4862	8.79649	0.85864	10.2447	1.25046e-24	3.47347e-22	Gm16439
ENSMUST00000164710.7	86.4364	-2.3532	0.230025	-10.2302	1.4519e-24	4.00315e-22	Tgfb1i1
ENSMUST00000089119.11	448.973	-0.925043	0.0904504	-10.2271	1.4998e-24	4.10482e-22	Rnaset2b
ENSMUST00000206712.1	453.851	-10.1781	0.995634	-10.2227	1.56933e-24	4.26377e-22	Rps13
ENSMUST00000180154.7	52.4275	-8.92679	0.880679	-10.1363	3.81423e-24	1.02879e-21	Plscr2
ENSMUST00000159663.7	67.391	-1.70653	0.170158	-10.0291	1.13573e-23	3.04131e-21	Gas5
ENSMUST00000142549.1	58.8785	-2.99917	0.299106	-10.0271	1.15863e-23	3.08047e-21	Gm14403
ENSMUST00000179734.1	78.2623	-6.63718	0.666741	-9.95467	2.40631e-23	6.35232e-21	Gm2163
ENSMUST00000147153.2	64.6525	-2.05011	0.206604	-9.92289	3.31024e-23	8.67702e-21	Lipo2
ENSMUST00000027760.13	612.656	-0.622921	0.0628333	-9.91388	3.6231e-23	9.4307e-21	Rgl1
ENSMUST00000163433.7	36.6409	-8.39928	0.851634	-9.86255	6.04911e-23	1.56361e-20	Eapp
ENSMUST00000105734.9	92.1524	1.46492	0.148686	9.85245	6.68946e-23	1.71721e-20	Gm13157
ENSMUST00000182751.1	32.8468	-8.34917	0.851384	-9.80658	1.05484e-22	2.68926e-20	Rbpsuh-rs3
ENSMUST00000146258.1	65.661	2.33352	0.238176	9.79744	1.15469e-22	2.92381e-20	Itgb3bp
ENSMUST00000199958.1	301.948	-1.78824	0.182656	-9.79021	1.24038e-22	3.11955e-20	Gm43305
ENSMUST00000091184.8	54.7444	2.40276	0.245462	9.78872	1.25875e-22	3.1445e-20	Slc25a31
ENSMUST00000071044.12	33.0566	4.41715	0.451795	9.77688	1.41508e-22	3.51149e-20	Capg
ENSMUST00000135399.7	173.468	-0.984335	0.100724	-9.77257	1.47665e-22	3.63998e-20	Usp16
ENSMUST00000201831.3	308.867	1.03443	0.105899	9.76801	1.54462e-22	3.78248e-20	Gm20559
ENSMUST00000036370.7	51.952	2.31266	0.237065	9.75538	1.74952e-22	4.25624e-20	Tagap
ENSMUST00000100526.2	38.3919	-6.01411	0.618437	-9.72468	2.36639e-22	5.71959e-20	Gm10874
ENSMUST00000140111.7	621.02	0.795171	0.0822932	9.66265	4.3447e-22	1.04334e-19	2610005L07Rik
ENSMUST00000108964.1	234.661	-2.07969	0.21537	-9.65639	4.61844e-22	1.10197e-19	Gm14410
ENSMUST00000179659.1	27.088	8.3383	0.863683	9.65435	4.71159e-22	1.11704e-19	Gm3317
ENSMUST00000183266.7	54.5104	-2.4923	0.25853	-9.6403	5.40303e-22	1.27286e-19	Rian
ENSMUST00000111755.3	33.7515	-8.34374	0.867633	-9.61667	6.79962e-22	1.5918e-19	Gm4353
ENSMUST00000023570.13	143.638	-5.02943	0.525854	-9.56432	1.1294e-21	2.6274e-19	Btg3
ENSMUST00000107991.2	44.0146	-8.78198	0.91846	-9.56163	1.15918e-21	2.67994e-19	Gm3892
ENSMUST00000031090.7	68.8357	-2.38852	0.251663	-9.49093	2.28972e-21	5.26097e-19	Sel1l3
ENSMUST00000023083.7	56.7567	-1.76009	0.185819	-9.47206	2.74369e-21	6.26537e-19	Cyp2d22
ENSMUST00000095793.1	71.5504	1.82045	0.192443	9.45971	3.08786e-21	7.00832e-19	Rnf17
ENSMUST00000085163.3	49.5079	-6.31739	0.667895	-9.45866	3.11914e-21	7.03641e-19	Gm10263
ENSMUST00000121655.1	30.1809	-8.21225	0.874441	-9.39143	5.919e-21	1.32721e-18	Got2-ps1
ENSMUST00000026704.13	2678.35	-0.857612	0.0914486	-9.37809	6.71811e-21	1.49737e-18	Cct8
ENSMUST00000050706.8	23.3413	8.13319	0.870966	9.33812	9.80613e-21	2.17264e-18	Gm5815
ENSMUST00000022665.2	134.616	-1.04738	0.112424	-9.31635	1.20409e-20	2.652e-18	Rhobtb2
ENSMUST00000156359.1	471.316	-7.18746	0.774438	-9.28086	1.6811e-20	3.68081e-18	Rplp0
ENSMUST00000122125.1	41.4806	7.54875	0.814027	9.27333	1.80416e-20	3.92717e-18	Rplp0-ps1
ENSMUST00000043867.10	536.334	-1.48737	0.160801	-9.24974	2.25045e-20	4.87012e-18	Rpl22l1
ENSMUST00000121393.8	2589.89	-0.763572	0.0825943	-9.24485	2.35562e-20	5.06827e-18	Gm4631
ENSMUST00000108975.8	35.6928	-3.2092	0.34728	-9.24096	2.44306e-20	5.22619e-18	Gm14419
ENSMUST00000052346.9	30.3801	-8.21074	0.890233	-9.22314	2.88535e-20	6.13706e-18	Llgl1
ENSMUST00000189730.1	21.4403	8.01733	0.871268	9.20191	3.51629e-20	7.43656e-18	Hdac4
ENSMUST00000190422.1	618.994	-10.3423	1.12945	-9.15696	5.33807e-20	1.12256e-17	Gm10031
ENSMUST00000183707.1	98.2353	2.61044	0.285306	9.14961	5.71379e-20	1.19482e-17	1500004A13Rik
ENSMUST00000180757.1	1807.06	0.916812	0.100664	9.10762	8.42126e-20	1.75115e-17	Gm26853
ENSMUST00000180396.1	290.705	-8.98994	0.987294	-9.10564	8.57626e-20	1.77348e-17	Gm26619
ENSMUST00000080898.2	108.921	2.5877	0.28489	9.08315	1.05481e-19	2.16917e-17	Amd2
ENSMUST00000185793.6	80.5067	-2.0938	0.231606	-9.04036	1.56153e-19	3.19359e-17	AV026068
ENSMUST00000191728.1	38.263	2.49027	0.276021	9.02204	1.84613e-19	3.755e-17	Nvl
ENSMUST00000160287.1	20.7911	7.9592	0.885883	8.98449	2.59939e-19	5.2584e-17	Gm3555
ENSMUST00000170694.7	51.4076	2.15684	0.242081	8.90958	5.1228e-19	1.03071e-16	Gm2237
ENSMUST00000054591.9	156.028	1.26657	0.142257	8.90345	5.41383e-19	1.08341e-16	Thnsl1
ENSMUST00000210952.1	85.0835	-1.4134	0.158919	-8.89384	5.90339e-19	1.17506e-16	NA
ENSMUST00000173837.5	21.201	-7.71609	0.873714	-8.83138	1.03395e-18	2.04712e-16	Magohb
ENSMUST00000030185.4	676.454	0.804978	0.0912128	8.82527	1.09195e-18	2.15051e-16	Tpm1
ENSMUST00000108952.3	309.34	-1.17179	0.133145	-8.80084	1.35798e-18	2.66035e-16	Gm14420
ENSMUST00000111589.1	16.7589	7.64717	0.872648	8.76318	1.89826e-18	3.69932e-16	Olfr1033
ENSMUST00000099396.2	177.833	0.866462	0.0990249	8.74994	2.13462e-18	4.13828e-16	Nt5dc3
ENSMUST00000108785.1	20.867	-7.6128	0.870761	-8.74269	2.27627e-18	4.39001e-16	Mrpl55
ENSMUST00000117234.1	37.6381	-1.98269	0.227048	-8.73247	2.49163e-18	4.78059e-16	Gm14400
ENSMUST00000069651.12	91.1053	2.31316	0.265164	8.72349	2.6976e-18	5.14923e-16	Gadl1
ENSMUST00000095795.4	27.5151	7.3734	0.845733	8.71835	2.82292e-18	5.36096e-16	Raet1d
ENSMUST00000118875.7	4576.45	2.03558	0.234029	8.698	3.37783e-18	6.38221e-16	Gapdh
ENSMUST00000170268.1	30.7621	-7.24245	0.833231	-8.69201	3.56092e-18	6.69418e-16	Tnnc1
ENSMUST00000133910.2	36.4944	-6.74452	0.778157	-8.66731	4.42454e-18	8.27589e-16	Gm15501
ENSMUST00000138771.1	91.6167	-1.44781	0.167237	-8.65725	4.83263e-18	8.99401e-16	Sh3pxd2b
ENSMUST00000120415.7	25.7714	-3.77508	0.43729	-8.63289	5.98234e-18	1.105e-15	Myl1
ENSMUST00000089534.4	40.1843	-3.95756	0.458443	-8.63261	5.99673e-18	1.105e-15	Gm7293
ENSMUST00000028207.12	430.662	-1.32842	0.154299	-8.60936	7.3471e-18	1.34716e-15	Crat
ENSMUST00000121728.2	27.5549	-7.62171	0.887719	-8.58572	9.02676e-18	1.64703e-15	Gm13301
ENSMUST00000165466.7	50.9864	1.77927	0.208668	8.52681	1.50441e-17	2.73157e-15	2610042L04Rik
ENSMUST00000141391.1	23.683	-2.81648	0.330556	-8.52042	1.5898e-17	2.87261e-15	Gm11281
ENSMUST00000167624.1	15.8384	7.55504	0.887132	8.51625	1.648e-17	2.96337e-15	Glo1
ENSMUST00000024840.11	677.076	0.70687	0.0833293	8.48284	2.1976e-17	3.93265e-15	Arhgap28
ENSMUST00000099224.9	2677.61	0.867461	0.102481	8.46461	2.57008e-17	4.57642e-15	Csnk2a1
ENSMUST00000177813.2	32.6025	2.14304	0.253192	8.46407	2.58194e-17	4.57642e-15	Gm3348
ENSMUST00000195209.1	28.668	3.53357	0.420965	8.39397	4.70013e-17	8.29139e-15	Nvl
ENSMUST00000153748.1	1445.72	0.936953	0.111786	8.38166	5.2185e-17	9.1624e-15	6820431F20Rik
ENSMUST00000209661.1	22.9428	-7.82986	0.93858	-8.34224	7.28945e-17	1.27384e-14	Col4a1
ENSMUST00000131033.7	28.0593	2.48949	0.299598	8.30943	9.6161e-17	1.67257e-14	4930447C04Rik
ENSMUST00000021512.9	580.667	0.823844	0.0992935	8.29706	1.06716e-16	1.84753e-14	Dhrs7
ENSMUST00000200473.1	678.908	-1.39391	0.168302	-8.28218	1.20936e-16	2.08402e-14	Gm42427
ENSMUST00000043961.11	512.534	1.01949	0.123367	8.26388	1.41017e-16	2.41887e-14	Abca5
ENSMUST00000160151.7	34.6242	-1.94594	0.236066	-8.2432	1.67666e-16	2.86278e-14	Fancc
ENSMUST00000181052.1	162.55	0.820258	0.0996154	8.23425	1.80689e-16	3.07105e-14	Gm26848
ENSMUST00000119718.7	54.1644	-4.82442	0.586191	-8.2301	1.87053e-16	3.16477e-14	Gm13212
ENSMUST00000177376.7	1514.97	-0.829983	0.100857	-8.22935	1.88238e-16	3.1704e-14	Cct8
ENSMUST00000070597.12	164.656	-0.844852	0.102793	-8.21892	2.05337e-16	3.44281e-14	Retsat
ENSMUST00000131221.1	52.2624	-1.62946	0.198298	-8.21725	2.08216e-16	3.47543e-14	2310058D17Rik
ENSMUST00000190451.6	77.744	-2.76245	0.336927	-8.19897	2.42461e-16	4.02897e-14	Tnnt2
ENSMUST00000161399.1	96.4637	-1.8503	0.226135	-8.18231	2.78458e-16	4.60657e-14	Tnnc1
ENSMUST00000056336.1	46.868	1.94919	0.238401	8.1761	2.93185e-16	4.82873e-14	Oprd1
ENSMUST00000123179.1	11.9856	7.18814	0.879303	8.17482	2.96311e-16	4.85871e-14	Gm12666
ENSMUST00000165981.7	481.25	-0.707179	0.0866537	-8.16097	3.32342e-16	5.42563e-14	Nisch
ENSMUST00000042261.4	89.6779	1.15726	0.142062	8.14619	3.75569e-16	6.10455e-14	Slc2a12
ENSMUST00000189121.1	22.0063	7.07559	0.871558	8.11832	4.72696e-16	7.64987e-14	Gm2427
ENSMUST00000165289.7	44.0651	1.76236	0.217133	8.1165	4.79839e-16	7.73184e-14	Gm3298
ENSMUST00000178043.1	68.3657	-4.49424	0.553939	-8.11324	4.92881e-16	7.90777e-14	Gm3892
ENSMUST00000180135.1	16.1897	4.76133	0.587999	8.0975	5.60983e-16	8.96176e-14	Gm17222
ENSMUST00000061324.4	37.0108	5.15614	0.636981	8.09466	5.74227e-16	9.13414e-14	Gm9923
ENSMUST00000173900.1	11.757	7.17382	0.886347	8.09369	5.78844e-16	9.1684e-14	A930015D03Rik
ENSMUST00000108800.7	139.794	1.79434	0.221758	8.0914	5.89824e-16	9.30272e-14	Tpd52l2
ENSMUST00000108496.8	107.331	-1.43159	0.177004	-8.08791	6.06987e-16	9.53303e-14	Slc1a5
ENSMUST00000078527.12	629.13	-0.748854	0.0926565	-8.08205	6.36867e-16	9.96028e-14	Rxfp1
ENSMUST00000206112.1	30.5433	-2.01783	0.250145	-8.06663	7.22628e-16	1.12543e-13	Gm45053
ENSMUST00000168866.1	37.524	5.57754	0.692007	8.05995	7.6326e-16	1.18375e-13	Gm3164
ENSMUST00000148566.1	34.2354	-3.01809	0.375637	-8.03458	9.39037e-16	1.45033e-13	Rmnd1
ENSMUST00000099414.3	220.863	0.849012	0.105809	8.02403	1.02328e-15	1.5739e-13	Zfp955b
ENSMUST00000186008.6	46.1773	4.08122	0.508888	8.01988	1.05851e-15	1.6214e-13	Actr3
ENSMUST00000166618.1	19.5123	-3.19117	0.398196	-8.01408	1.10966e-15	1.69278e-13	Gm6356
ENSMUST00000005256.12	326.227	-0.933604	0.116831	-7.99109	1.33755e-15	2.03209e-13	Ndrg1
ENSMUST00000044003.13	133.04	-2.0848	0.261167	-7.98265	1.43223e-15	2.1671e-13	Abca6
ENSMUST00000178995.1	1769.57	0.721005	0.090761	7.944	1.95761e-15	2.95004e-13	Gm21092
ENSMUST00000095347.11	590.091	-0.621372	0.0782898	-7.93682	2.07424e-15	3.11319e-13	Brd2
ENSMUST00000200270.1	53.4686	-1.43031	0.180628	-7.9185	2.40393e-15	3.59354e-13	Cacna2d1
ENSMUST00000021407.10	793.132	0.960316	0.121435	7.90809	2.61362e-15	3.89136e-13	Srp54a
ENSMUST00000076155.4	1654.51	1.41443	0.179275	7.88973	3.02838e-15	4.49094e-13	Eno1b
ENSMUST00000165193.1	27.219	6.92362	0.88348	7.83676	4.62336e-15	6.829e-13	Gm3468
ENSMUST00000181610.1	24.6587	-6.8046	0.869261	-7.82802	4.95599e-15	7.27791e-13	Gm26880
ENSMUST00000034464.6	332.528	-0.696925	0.0890324	-7.82776	4.96639e-15	7.27791e-13	2310022B05Rik
ENSMUST00000120833.1	50.1802	-6.59616	0.845485	-7.80163	6.1114e-15	8.92073e-13	Gm14414
ENSMUST00000209823.1	42.5214	-1.90032	0.244614	-7.76865	7.93297e-15	1.15344e-12	NA
ENSMUST00000151559.1	10.0017	6.91861	0.891531	7.76036	8.46853e-15	1.22652e-12	Uqcr10
ENSMUST00000008812.7	1870.25	2.37245	0.306108	7.75037	9.16259e-15	1.3219e-12	Rps18
ENSMUST00000032585.7	261.544	-1.24288	0.160908	-7.72418	1.12579e-14	1.61792e-12	Pop4
ENSMUST00000156341.1	44.3235	-1.65133	0.214194	-7.70951	1.26305e-14	1.8082e-12	Tatdn3
ENSMUST00000190934.1	18.105	-4.33668	0.563464	-7.69646	1.39883e-14	1.99491e-12	Aste1
ENSMUST00000058103.4	20.9685	-6.74142	0.876212	-7.69382	1.42808e-14	2.02886e-12	Gm5436
ENSMUST00000122809.1	28.1244	4.08516	0.53122	7.69015	1.46966e-14	2.07999e-12	Rps2
ENSMUST00000120988.1	39.0832	-1.72312	0.224281	-7.68289	1.5554e-14	2.193e-12	Cisd2
ENSMUST00000117914.1	14.9884	6.94705	0.907424	7.65579	1.92121e-14	2.69854e-12	Rps15a-ps8
ENSMUST00000174011.7	606.222	0.704381	0.0920987	7.64811	2.03957e-14	2.85402e-12	Mterf3
ENSMUST00000026839.4	626.11	0.714409	0.0934425	7.64544	2.08234e-14	2.90295e-12	Prps2
ENSMUST00000199072.1	46.6464	1.32155	0.173306	7.62554	2.43015e-14	3.37519e-12	Gm43672
ENSMUST00000108334.7	556.437	-1.0476	0.137439	-7.62232	2.49165e-14	3.44774e-12	Asph
ENSMUST00000095323.7	44.3559	-1.83556	0.241051	-7.61485	2.63997e-14	3.63944e-12	1700029J07Rik
ENSMUST00000034469.5	554.454	-0.811867	0.107194	-7.57379	3.62486e-14	4.97877e-12	Egln1
ENSMUST00000208382.1	13.7277	3.24797	0.431188	7.5326	4.974e-14	6.8067e-12	Gm7451
ENSMUST00000148571.7	22.1772	2.13052	0.283362	7.51871	5.53179e-14	7.54228e-12	Edem2
ENSMUST00000103105.9	37.1337	-2.25002	0.300159	-7.4961	6.57429e-14	8.93095e-12	Aoc3
ENSMUST00000110949.8	426.192	-1.71157	0.228461	-7.49175	6.79629e-14	9.19896e-12	Arhgap11a
ENSMUST00000203414.1	267.604	-1.25245	0.16721	-7.49024	6.87503e-14	9.27182e-12	Naaladl2
ENSMUST00000069044.6	11.1111	-6.77121	0.904076	-7.48965	6.90599e-14	9.27996e-12	Gm7353
ENSMUST00000152419.1	13.2672	6.79439	0.908532	7.47843	7.52179e-14	1.00711e-11	1700073E17Rik
ENSMUST00000112680.7	1013.41	-0.507775	0.0680828	-7.4582	8.77132e-14	1.1702e-11	Epb41l3
ENSMUST00000118885.7	14.3102	7.30778	0.98006	7.45647	8.88738e-14	1.18145e-11	Hmox2
ENSMUST00000096184.4	55.9785	3.09883	0.41744	7.42342	1.14138e-13	1.5119e-11	Gm5796
ENSMUST00000108006.3	14.0255	-5.64484	0.761409	-7.41367	1.22852e-13	1.62156e-11	Il11ra2
ENSMUST00000079733.5	15.5635	4.34097	0.587567	7.38804	1.49005e-13	1.95982e-11	Gm10036
ENSMUST00000027303.13	335.115	-0.512374	0.0694229	-7.38047	1.57737e-13	2.06736e-11	Imp4
ENSMUST00000146867.1	18.3776	4.67653	0.635351	7.36054	1.83162e-13	2.39215e-11	Rps2
ENSMUST00000190715.6	26.2943	2.20713	0.300349	7.34856	2.00351e-13	2.6075e-11	Cep70
ENSMUST00000177591.1	23.5641	-2.26022	0.308171	-7.33428	2.22915e-13	2.89106e-11	Erdr1
ENSMUST00000129970.1	10.2164	-6.59787	0.900203	-7.32931	2.31346e-13	2.98999e-11	Gm13305
ENSMUST00000090938.10	137.034	-1.28516	0.17544	-7.32537	2.38242e-13	3.06846e-11	Dap3
ENSMUST00000062289.10	124.106	1.40026	0.191458	7.31367	2.5995e-13	3.32633e-11	Bend6
ENSMUST00000195680.1	192.323	-0.876535	0.11985	-7.31361	2.60051e-13	3.32633e-11	Gm37697
ENSMUST00000081742.6	16.4023	2.67495	0.36662	7.29626	2.95878e-13	3.77164e-11	Gm13154
ENSMUST00000133472.1	173.974	-4.59144	0.629649	-7.29206	3.05242e-13	3.87772e-11	Gm6206
ENSMUST00000136312.1	1410.35	-1.89636	0.260465	-7.28065	3.32205e-13	4.20589e-11	Ubc
ENSMUST00000181931.2	55.0719	-1.31375	0.180494	-7.27864	3.37197e-13	4.25462e-11	Gm10524
ENSMUST00000184450.7	275.442	-0.871477	0.119816	-7.27343	3.50474e-13	4.40721e-11	Nedd4
ENSMUST00000183125.1	269.049	1.36854	0.188342	7.26626	3.69582e-13	4.63185e-11	Zfp386
ENSMUST00000110961.8	146.179	4.84209	0.666528	7.26465	3.74005e-13	4.67154e-11	Zscan21
ENSMUST00000029936.4	12.8892	4.34643	0.598774	7.25887	3.90336e-13	4.85923e-11	Gbp2b
ENSMUST00000110708.2	1088.08	0.805266	0.111216	7.24058	4.46767e-13	5.54318e-11	Srp54b
ENSMUST00000154810.1	142.318	-1.38358	0.191728	-7.2164	5.33831e-13	6.60141e-11	G530011O06Rik
ENSMUST00000119405.1	20.8604	-6.25451	0.866855	-7.21518	5.38627e-13	6.63866e-11	Gm13302
ENSMUST00000022531.13	270.305	-0.527819	0.0731603	-7.21455	5.41112e-13	6.64728e-11	Lats2
ENSMUST00000210425.1	188.512	-0.994428	0.138109	-7.20032	6.00707e-13	7.35511e-11	Cdh11
ENSMUST00000044195.5	146.397	0.897902	0.124765	7.19676	6.16605e-13	7.50042e-11	Tmc7
ENSMUST00000019862.2	79.1806	-1.58378	0.220065	-7.19691	6.15941e-13	7.50042e-11	L3hypdh
ENSMUST00000191759.1	41.0065	-2.43234	0.338187	-7.19231	6.3705e-13	7.72387e-11	Gm37530
ENSMUST00000116393.2	14.5337	-4.41389	0.614104	-7.18753	6.59746e-13	7.97307e-11	Serpina3h
ENSMUST00000112525.4	231.535	0.7745	0.107816	7.18351	6.79429e-13	8.18437e-11	Pla2r1
ENSMUST00000030852.12	306.856	-0.921341	0.128313	-7.18042	6.94988e-13	8.34478e-11	Rint1
ENSMUST00000019944.8	51.6063	1.29559	0.180487	7.1783	7.05835e-13	8.44777e-11	Adat2
ENSMUST00000161461.7	13.0994	-7.02422	0.980435	-7.16439	7.81339e-13	9.32147e-11	Gas5
ENSMUST00000057256.3	416.258	0.518507	0.0723955	7.16214	7.9426e-13	9.44535e-11	6030458C11Rik
ENSMUST00000111708.8	11.3158	7.08684	0.990712	7.15328	8.47291e-13	1.00439e-10	Lmntd1
ENSMUST00000105971.7	46.7386	1.45954	0.204122	7.15032	8.65732e-13	1.02299e-10	Tnni2
ENSMUST00000134138.1	575.606	0.671222	0.0941009	7.13301	9.82003e-13	1.15671e-10	Ddx26b
ENSMUST00000118761.1	101.527	-1.17607	0.164964	-7.12927	1.00901e-12	1.18477e-10	Gm14292
ENSMUST00000159483.7	41.731	4.62085	0.648402	7.12653	1.02931e-12	1.20482e-10	Stag3
ENSMUST00000161113.7	17.5283	3.83274	0.539074	7.10986	1.16163e-12	1.35543e-10	Stag3
ENSMUST00000171621.2	14.2998	3.53939	0.498597	7.0987	1.2594e-12	1.46491e-10	Tifa
ENSMUST00000117600.7	68.5468	-6.61046	0.93137	-7.09757	1.26974e-12	1.47235e-10	Hmga1
ENSMUST00000165401.1	17.386	-3.41186	0.480898	-7.09476	1.29576e-12	1.49785e-10	Gm5859
ENSMUST00000121299.1	27.0307	-1.86365	0.262853	-7.09008	1.34036e-12	1.54461e-10	Mdm4-ps
ENSMUST00000211473.1	8.92805	-6.36908	0.89847	-7.08881	1.35267e-12	1.55398e-10	NA
ENSMUST00000041252.12	66.1125	1.44918	0.204742	7.07807	1.46181e-12	1.6742e-10	Acad12
ENSMUST00000035325.14	304.797	0.739534	0.104818	7.05539	1.72112e-12	1.96513e-10	Qsox1
ENSMUST00000006814.8	10.6747	7.0084	0.993466	7.05449	1.73237e-12	1.97193e-10	Abhd1
ENSMUST00000118522.7	295.003	0.732718	0.104296	7.02538	2.13486e-12	2.42268e-10	Paxbp1
ENSMUST00000073012.12	10329.5	-1.37657	0.196089	-7.02015	2.21628e-12	2.50743e-10	Postn
ENSMUST00000163885.1	9.83716	6.39541	0.911598	7.0156	2.28966e-12	2.5826e-10	Gm3248
ENSMUST00000085939.6	397.543	0.890551	0.127015	7.01141	2.35934e-12	2.65315e-10	Fxyd6
ENSMUST00000119005.1	8.66191	-6.31271	0.902729	-6.99292	2.69227e-12	3.01842e-10	Gm11222
ENSMUST00000084124.6	371.336	-0.72925	0.104428	-6.9833	2.88332e-12	3.22291e-10	Pgd
ENSMUST00000020679.2	123.214	1.2108	0.173444	6.98091	2.93273e-12	3.26833e-10	Nipal4
ENSMUST00000196988.4	22.7575	7.82906	1.12321	6.97027	3.16324e-12	3.51469e-10	Sycp1
ENSMUST00000193396.1	7.52122	6.48815	0.932415	6.95843	3.44083e-12	3.81174e-10	Gm29718
ENSMUST00000107985.9	15835.3	-1.09203	0.157805	-6.92012	4.51275e-12	4.98438e-10	Postn
ENSMUST00000012281.7	358.24	0.865828	0.125275	6.91142	4.79838e-12	5.28418e-10	Bmp5
ENSMUST00000022727.8	166.206	-0.76142	0.110637	-6.88212	5.89696e-12	6.47482e-10	Tgds
ENSMUST00000146814.4	50.792	1.69446	0.246825	6.86503	6.64753e-12	7.27749e-10	Stard13
ENSMUST00000171906.1	76.2661	1.52999	0.222916	6.86352	6.71837e-12	7.33347e-10	Gm3667
ENSMUST00000054483.13	8.8789	-6.38505	0.933971	-6.83645	8.118e-12	8.80957e-10	Tifa
ENSMUST00000035166.11	444.069	0.501141	0.0733015	6.83671	8.1031e-12	8.80957e-10	Uba5
ENSMUST00000120430.1	11.7659	-6.65332	0.974926	-6.82444	8.8271e-12	9.55123e-10	Gm7901
ENSMUST00000174236.7	656.602	-0.753166	0.110678	-6.80504	1.01023e-11	1.08994e-09	Gcnt1
ENSMUST00000170613.7	27.1088	2.93464	0.431472	6.80146	1.03565e-11	1.11413e-09	Gm6337
ENSMUST00000095615.2	294.462	1.32001	0.194332	6.79252	1.10195e-11	1.18204e-09	Zfp945
ENSMUST00000112866.7	242.148	-1.02006	0.150555	-6.77531	1.24143e-11	1.32783e-09	Cxcl12
ENSMUST00000133001.7	470.044	0.93011	0.13806	6.73701	1.61676e-11	1.72432e-09	Gm6483
ENSMUST00000052827.5	272.112	1.03786	0.154184	6.73132	1.68126e-11	1.78799e-09	Ppp1r17
ENSMUST00000150868.1	98.2283	-1.15377	0.171747	-6.71786	1.84407e-11	1.95556e-09	Postn
ENSMUST00000210130.1	505.606	0.82679	0.123417	6.69914	2.09656e-11	2.21699e-09	NA
ENSMUST00000139281.1	85.6403	1.75179	0.261945	6.68764	2.26791e-11	2.39139e-09	Khdrbs1
ENSMUST00000112087.8	1730.46	1.2849	0.192331	6.6807	2.37808e-11	2.50048e-09	Tnnt2
ENSMUST00000117905.1	6.51602	6.31685	0.945597	6.68027	2.38503e-11	2.50072e-09	Gm15442
ENSMUST00000113071.1	13.7801	2.57579	0.385742	6.67749	2.43071e-11	2.54145e-09	Tmsb15b1
ENSMUST00000025290.5	660.948	0.557618	0.0835487	6.67416	2.48651e-11	2.59252e-09	Impact
ENSMUST00000211035.1	18.9944	-2.49972	0.374767	-6.67008	2.55663e-11	2.65819e-09	NA
ENSMUST00000062122.3	2129.59	-0.873779	0.131078	-6.66607	2.62736e-11	2.72411e-09	Cmya5
ENSMUST00000112256.2	74.5983	-0.965076	0.144847	-6.66271	2.68829e-11	2.77955e-09	Rint1
ENSMUST00000128160.1	14.8707	2.45075	0.368162	6.65672	2.79998e-11	2.88701e-09	4930481B07Rik
ENSMUST00000177768.1	191.896	0.593948	0.0892876	6.65208	2.88988e-11	2.97147e-09	Fam177a
ENSMUST00000166928.7	10.3348	4.47464	0.673621	6.64266	3.08069e-11	3.15894e-09	Gm3115
ENSMUST00000194128.1	7.47225	-6.22635	0.937487	-6.64153	3.1044e-11	3.1745e-09	Gm8010
ENSMUST00000112467.1	9.78501	3.96815	0.597693	6.63911	3.15591e-11	3.21833e-09	Ifit1bl1
ENSMUST00000170207.7	156.537	1.78025	0.268352	6.63401	3.26681e-11	3.32233e-09	Gm8108
ENSMUST00000136982.2	76.0183	-0.902615	0.136117	-6.63118	3.3302e-11	3.37757e-09	Lsm8
ENSMUST00000168485.7	1541.65	-2.62845	0.397216	-6.61717	3.66135e-11	3.70333e-09	Myh7
ENSMUST00000173107.7	200.922	0.959851	0.145257	6.60795	3.89675e-11	3.93075e-09	Slit2
ENSMUST00000088585.9	515.623	0.81736	0.123796	6.60245	4.04416e-11	4.05404e-09	Sulf1
ENSMUST00000150005.7	368.223	-1.26455	0.191535	-6.60218	4.05165e-11	4.05404e-09	C130080G10Rik
ENSMUST00000020759.11	269.567	-1.54852	0.234537	-6.60245	4.04428e-11	4.05404e-09	Efemp1
ENSMUST00000160777.7	100.847	1.74819	0.264899	6.59947	4.1262e-11	4.11758e-09	Oprk1
ENSMUST00000071544.10	21.0803	-4.05781	0.615258	-6.5953	4.24406e-11	4.22386e-09	Snapc3
ENSMUST00000021864.6	2536.87	-0.299878	0.0455746	-6.57993	4.70657e-11	4.67168e-09	Ssr1
ENSMUST00000059428.6	45.1711	-1.35737	0.206647	-6.56853	5.08129e-11	5.03021e-09	Ccdc149
ENSMUST00000180321.1	10.0305	-6.59817	1.00671	-6.55418	5.59497e-11	5.52403e-09	Gm9726
ENSMUST00000181532.1	11.9206	2.54927	0.391424	6.5128	7.3761e-11	7.26331e-09	Gm26740
ENSMUST00000022709.4	172.249	-0.798432	0.122967	-6.49308	8.4101e-11	8.25965e-09	Spry2
ENSMUST00000101486.4	32.0845	4.06953	0.627048	6.48997	8.58522e-11	8.40945e-09	Xlr3b
ENSMUST00000182491.6	754.064	-0.791829	0.122039	-6.48834	8.67867e-11	8.47867e-09	Rxfp1
ENSMUST00000097425.9	184.039	-1.34674	0.20779	-6.48125	9.09683e-11	8.86393e-09	Fndc1
ENSMUST00000183234.2	126.707	-1.10177	0.170018	-6.48033	9.15238e-11	8.89477e-09	Ank2
ENSMUST00000061703.9	25.9246	2.71274	0.419301	6.46969	9.82035e-11	9.51909e-09	Morn2
ENSMUST00000182689.7	25.9555	1.9877	0.308131	6.45082	1.11245e-10	1.07273e-08	Rian
ENSMUST00000069511.6	155.998	0.964947	0.149579	6.45109	1.11048e-10	1.07273e-08	Abcd2
ENSMUST00000193092.1	53.8961	1.21187	0.188195	6.43945	1.19909e-10	1.14961e-08	Gm37194
ENSMUST00000109793.2	15.2563	-7.09795	1.10231	-6.43915	1.20143e-10	1.14961e-08	Commd5
ENSMUST00000134066.7	68.976	1.03003	0.159961	6.43927	1.20048e-10	1.14961e-08	BC065397
ENSMUST00000005606.7	679.419	-0.601983	0.0935459	-6.43516	1.23343e-10	1.1772e-08	Prkaca
ENSMUST00000076734.6	742.701	-0.340924	0.0530284	-6.42909	1.28373e-10	1.22207e-08	Scaf8
ENSMUST00000054294.6	299.961	-0.51012	0.0794064	-6.42416	1.32601e-10	1.2591e-08	Fzd1
ENSMUST00000020362.2	40.0601	1.82964	0.285027	6.41918	1.37006e-10	1.29762e-08	Kcnmb1
ENSMUST00000145036.2	1422.58	-1.1516	0.179441	-6.41772	1.38332e-10	1.30354e-08	Postn
ENSMUST00000046777.10	55.8582	1.00325	0.156322	6.41782	1.38242e-10	1.30354e-08	Ift57
ENSMUST00000049357.9	272.217	-0.683379	0.106879	-6.39394	1.61661e-10	1.51953e-08	Pnrc1
ENSMUST00000040487.3	52.9097	-1.16554	0.18262	-6.38232	1.7442e-10	1.63533e-08	Rsad1
ENSMUST00000024572.9	233.821	-0.855929	0.1346	-6.35905	2.03001e-10	1.89852e-08	Rsph3b
ENSMUST00000117383.7	7.17523	-6.14123	0.970561	-6.3275	2.49163e-10	2.3244e-08	Sec11a
ENSMUST00000194850.1	11.6982	2.81649	0.445298	6.32496	2.53296e-10	2.35705e-08	Gm38264
ENSMUST00000092674.12	101.915	-0.955772	0.15129	-6.31749	2.65846e-10	2.46766e-08	Hbs1l
ENSMUST00000040523.8	248.415	-0.988453	0.156705	-6.30774	2.83147e-10	2.62171e-08	Adamts2
ENSMUST00000185806.2	10.8153	-5.28295	0.838241	-6.30242	2.93041e-10	2.70659e-08	Gm5835
ENSMUST00000024860.7	123.818	0.742684	0.11811	6.28806	3.21464e-10	2.96177e-08	Ehd3
ENSMUST00000142013.1	39.6441	1.8772	0.299336	6.2712	3.5827e-10	3.29272e-08	Usp14
ENSMUST00000095350.10	9.71844	3.37451	0.538585	6.26551	3.71612e-10	3.40693e-08	Aebp2
ENSMUST00000191135.1	33.3674	-1.49577	0.238775	-6.26436	3.7436e-10	3.42369e-08	Zfp951
ENSMUST00000038753.5	376.8	-1.04047	0.166152	-6.26212	3.79785e-10	3.4648e-08	Sh3pxd2b
ENSMUST00000209949.1	8.3078	5.65778	0.905606	6.24751	4.17049e-10	3.79545e-08	NA
ENSMUST00000209260.1	8.5253	5.68889	0.910739	6.24646	4.19867e-10	3.81178e-08	NA
ENSMUST00000102696.4	2781.59	1.73989	0.278655	6.24387	4.26872e-10	3.86594e-08	Rps8
ENSMUST00000198331.1	83.3577	0.936779	0.150452	6.22645	4.77126e-10	4.31058e-08	AI506816
ENSMUST00000117757.8	2422.01	5.39638	0.867517	6.22048	4.95631e-10	4.46692e-08	Gapdh
ENSMUST00000193928.1	123.77	-2.09242	0.337982	-6.19091	5.98168e-10	5.37802e-08	Gm38056
ENSMUST00000097794.3	18.1477	-4.19612	0.678801	-6.18166	6.34299e-10	5.68913e-08	Gm13212
ENSMUST00000167498.1	99.942	1.08174	0.175295	6.17095	6.78797e-10	6.0736e-08	Gm6548
ENSMUST00000098508.8	51.9885	1.24516	0.202557	6.14722	7.88537e-10	7.03859e-08	Zfp788
ENSMUST00000018002.12	296.547	0.67709	0.110196	6.14442	8.02544e-10	7.14634e-08	Ift52
ENSMUST00000080281.13	1919.66	0.860199	0.140005	6.14405	8.04448e-10	7.14634e-08	Rpl15
ENSMUST00000048967.8	1726.96	-0.568118	0.0925653	-6.13749	8.38362e-10	7.42988e-08	Cpe
ENSMUST00000097395.3	55.4255	3.43238	0.560172	6.12736	8.93518e-10	7.89989e-08	Ermard
ENSMUST00000148151.7	26.5039	3.36995	0.550834	6.11792	9.4806e-10	8.36225e-08	Flcn
ENSMUST00000205871.1	28.541	-2.84995	0.46589	-6.11722	9.52246e-10	8.37931e-08	Rabac1
ENSMUST00000032185.8	548.703	-0.549167	0.089868	-6.11082	9.91205e-10	8.70156e-08	Slc6a6
ENSMUST00000034470.9	447.149	-0.37125	0.0607693	-6.10917	1.00149e-09	8.77116e-08	Vps26b
ENSMUST00000166172.8	561.165	-0.485059	0.0794075	-6.10847	1.0059e-09	8.77729e-08	Abl2
ENSMUST00000167363.1	10.0062	-5.66428	0.927308	-6.10831	1.0069e-09	8.77729e-08	Gm17081
ENSMUST00000208302.1	37.2828	-1.45459	0.238368	-6.10229	1.04562e-09	9.09343e-08	Gm44751
ENSMUST00000169087.2	18.1432	3.49377	0.573122	6.09602	1.08739e-09	9.41767e-08	Gm3373
ENSMUST00000099558.4	427.804	-0.669203	0.109779	-6.09594	1.08796e-09	9.41767e-08	Tjp2
ENSMUST00000198527.1	212.303	0.487947	0.0801847	6.08529	1.16279e-09	1.00421e-07	4632415L05Rik
ENSMUST00000201584.1	261.815	0.807823	0.132847	6.08085	1.19549e-09	1.03006e-07	Gm42546
ENSMUST00000168088.7	8.43959	4.54193	0.747296	6.07781	1.21831e-09	1.0473e-07	Gm6337
ENSMUST00000073935.6	109.259	1.19995	0.197799	6.06652	1.30708e-09	1.12102e-07	Gsg1l
ENSMUST00000186398.1	47.6301	0.967901	0.159583	6.06519	1.31798e-09	1.12777e-07	Dars
ENSMUST00000134456.7	38.4022	-4.59693	0.760532	-6.04437	1.49997e-09	1.28055e-07	C130080G10Rik
ENSMUST00000111461.10	58.8112	-4.09037	0.677769	-6.03505	1.58916e-09	1.35358e-07	Ptpmt1
ENSMUST00000111663.8	265.453	0.7334	0.121706	6.02601	1.68054e-09	1.42815e-07	Fgfr1op2
ENSMUST00000140653.1	81.0583	0.800436	0.132988	6.01884	1.75669e-09	1.48946e-07	D5Ertd579e
ENSMUST00000182008.7	62.612	-1.08021	0.179801	-6.00778	1.88081e-09	1.58655e-07	Ank2
ENSMUST00000033133.11	136.595	0.80137	0.133383	6.00802	1.87803e-09	1.58655e-07	Rgs10
ENSMUST00000034791.14	133.52	0.959509	0.159718	6.00751	1.88398e-09	1.58655e-07	Lca5
ENSMUST00000070681.6	356.303	-0.450139	0.0749646	-6.00468	1.91706e-09	1.61077e-07	Gid4
ENSMUST00000102582.7	252.337	-0.888692	0.148292	-5.99284	2.06211e-09	1.72873e-07	Acacb
ENSMUST00000078804.11	2046.37	0.907253	0.151492	5.9888	2.11399e-09	1.76824e-07	Rpl35a
ENSMUST00000073471.12	3338.47	1.07514	0.179877	5.97708	2.27176e-09	1.89595e-07	Rpl26
ENSMUST00000136837.1	12.2644	-2.43142	0.407094	-5.97263	2.33465e-09	1.94408e-07	Ppfibp1
ENSMUST00000202830.1	33.6093	-1.25294	0.209948	-5.96789	2.40341e-09	1.99687e-07	Limch1
ENSMUST00000120375.7	52.1333	-6.32651	1.06041	-5.96611	2.4298e-09	2.0143e-07	Itga3
ENSMUST00000180974.1	15.1359	2.5433	0.427443	5.95003	2.68095e-09	2.21756e-07	C920006O11Rik
ENSMUST00000163636.7	11.9698	2.19299	0.368763	5.94688	2.733e-09	2.2556e-07	Gm8356
ENSMUST00000138797.1	40.6078	-2.05243	0.345215	-5.94537	2.75838e-09	2.27151e-07	Slfn9
ENSMUST00000079090.4	7.97983	-6.25614	1.05281	-5.94231	2.8103e-09	2.30408e-07	Crry-ps
ENSMUST00000161304.1	258.58	-1.46513	0.246554	-5.94242	2.8085e-09	2.30408e-07	Tbc1d4
ENSMUST00000176016.1	9.10016	-4.1745	0.702797	-5.93984	2.85309e-09	2.33401e-07	AA465934
ENSMUST00000170651.1	165.42	-1.33074	0.224264	-5.93381	2.95987e-09	2.41606e-07	Dnah8
ENSMUST00000197574.1	161.47	-0.764329	0.128912	-5.92906	3.04672e-09	2.48151e-07	Cd36
ENSMUST00000107157.8	425.069	0.594503	0.100358	5.92384	3.14517e-09	2.5561e-07	Slc24a2
ENSMUST00000124048.7	115.02	-0.973524	0.164826	-5.90639	3.49696e-09	2.83581e-07	Ccdc30
ENSMUST00000087614.10	26.0712	-7.85939	1.33166	-5.90195	3.59225e-09	2.90676e-07	Aebp2
ENSMUST00000036796.7	78.517	-1.47788	0.25082	-5.89219	3.81118e-09	3.07722e-07	Fstl4
ENSMUST00000185946.6	86.3252	4.47737	0.762898	5.86889	4.38717e-09	3.53461e-07	AV026068
ENSMUST00000181260.1	27.9639	-5.99672	1.02396	-5.85641	4.72977e-09	3.80241e-07	Gm26720
ENSMUST00000167717.3	137.073	1.3726	0.234429	5.8551	4.76731e-09	3.82433e-07	Tmem181b-ps
ENSMUST00000142059.1	84.2734	3.654	0.624503	5.85105	4.88486e-09	3.9102e-07	Il11ra1
ENSMUST00000141135.4	22.0301	1.92021	0.328222	5.85034	4.90558e-09	3.91836e-07	Abca4
ENSMUST00000173932.7	69.0645	1.31867	0.225477	5.84836	4.96443e-09	3.95687e-07	Ndst4
ENSMUST00000038197.2	20.1124	-2.3294	0.398534	-5.84493	5.06789e-09	4.03071e-07	Mrap
ENSMUST00000038211.11	647.328	-0.63032	0.107857	-5.84406	5.09448e-09	4.04321e-07	Slfn9
ENSMUST00000002908.7	94.7591	-1.45002	0.248327	-5.83916	5.24634e-09	4.15488e-07	Plin4
ENSMUST00000125660.2	456.068	0.805478	0.138146	5.83065	5.52116e-09	4.36324e-07	Guf1
ENSMUST00000181562.7	15.6439	5.02064	0.861282	5.82927	5.56712e-09	4.39024e-07	Gm3488
ENSMUST00000066091.13	198.708	-0.458277	0.0786679	-5.82547	5.69526e-09	4.4818e-07	Smad1
ENSMUST00000127826.1	77.8223	0.965298	0.165912	5.81814	5.95052e-09	4.67279e-07	2610305D13Rik
ENSMUST00000160586.5	96.9869	0.707394	0.121648	5.81506	6.06105e-09	4.74957e-07	Alpk1
ENSMUST00000166493.7	14.276	2.78191	0.478429	5.81468	6.07492e-09	4.75044e-07	Gm6676
ENSMUST00000089162.4	321.135	-0.578984	0.0996026	-5.81294	6.13844e-09	4.79004e-07	Edem1
ENSMUST00000108949.2	602.672	-0.60437	0.104032	-5.80947	6.26691e-09	4.88006e-07	Gm8898
ENSMUST00000016172.7	176.528	-0.904877	0.155865	-5.8055	6.41756e-09	4.98694e-07	Celsr1
ENSMUST00000063524.2	14.9683	5.38173	0.927383	5.80314	6.50854e-09	5.0438e-07	5031410I06Rik
ENSMUST00000024870.6	140.313	0.59179	0.101982	5.8029	6.51784e-09	5.0438e-07	Slc30a6
ENSMUST00000075317.11	234.336	-0.959337	0.165353	-5.80175	6.56244e-09	5.06778e-07	Pdzd2
ENSMUST00000151038.1	11.289	-2.95952	0.510666	-5.79541	6.81527e-09	5.25213e-07	Gm5860
ENSMUST00000043884.4	105.718	1.10992	0.191788	5.7872	7.15675e-09	5.5039e-07	Lrrn3
ENSMUST00000113245.8	71.6821	0.942861	0.163277	5.77461	7.71307e-09	5.9195e-07	Irak1bp1
ENSMUST00000186156.6	237.941	-0.819737	0.142531	-5.75128	8.85709e-09	6.78351e-07	BC034090
ENSMUST00000126619.1	15.5605	-2.13821	0.371852	-5.75017	8.91551e-09	6.81423e-07	Stk38
ENSMUST00000120647.1	8.71476	3.28727	0.571829	5.74869	8.99391e-09	6.86007e-07	Gm11839
ENSMUST00000174252.7	359.653	0.75712	0.131743	5.74693	9.08792e-09	6.9176e-07	Scyl2
ENSMUST00000195088.5	73.764	1.22194	0.212654	5.74612	9.13155e-09	6.93662e-07	Pcdh11x
ENSMUST00000185113.1	16.2396	7.45685	1.29796	5.74505	9.18916e-09	6.96617e-07	Vps13d
ENSMUST00000159670.2	146.955	-1.39481	0.243585	-5.72619	1.02714e-08	7.77077e-07	Agl
ENSMUST00000122065.1	46.0518	-1.55568	0.271821	-5.72316	1.04558e-08	7.89425e-07	Cgnl1
ENSMUST00000208696.1	137.711	-1.3018	0.227648	-5.71848	1.07482e-08	8.09855e-07	Gm44630
ENSMUST00000081216.11	17.1739	-5.89321	1.03163	-5.71254	1.11301e-08	8.36938e-07	Ifi203
ENSMUST00000040594.9	45.3557	1.67923	0.294048	5.71075	1.12477e-08	8.44076e-07	Ermard
ENSMUST00000080517.13	233.692	0.622993	0.109162	5.70703	1.14968e-08	8.61032e-07	2610301B20Rik
ENSMUST00000122385.2	18.7243	2.01796	0.354018	5.70016	1.19696e-08	8.94645e-07	Gm15975
ENSMUST00000102880.4	900.8	-0.712047	0.124932	-5.6995	1.20158e-08	8.96299e-07	Ppp3r1
ENSMUST00000039726.7	103.566	0.708275	0.124312	5.69757	1.21526e-08	9.0469e-07	3110052M02Rik
ENSMUST00000194798.1	30.3888	3.37597	0.593067	5.6924	1.25268e-08	9.30682e-07	Rfwd2
ENSMUST00000197962.1	240.821	-0.59884	0.105283	-5.68793	1.28589e-08	9.53453e-07	Cenpa
ENSMUST00000139119.1	11.8072	-2.35234	0.413606	-5.6874	1.28992e-08	9.54538e-07	Gm12454
ENSMUST00000030206.9	86.6996	7.91037	1.39128	5.6857	1.3028e-08	9.62161e-07	Snapc3
ENSMUST00000029623.10	62.0298	1.02175	0.179719	5.68527	1.30605e-08	9.6265e-07	Tlr2
ENSMUST00000174313.7	176.915	-9.12938	1.60811	-5.67707	1.37018e-08	1.00792e-06	Slit2
ENSMUST00000211109.1	31.3914	1.25199	0.220737	5.67185	1.41265e-08	1.03711e-06	Zfp791
ENSMUST00000148600.2	14.8287	2.16759	0.382195	5.67143	1.41613e-08	1.03762e-06	Glrx2
ENSMUST00000091708.4	12.4821	-4.88165	0.86086	-5.67067	1.42244e-08	1.0402e-06	Hist1h2al
ENSMUST00000181486.1	131.893	0.957626	0.168945	5.66826	1.44253e-08	1.05282e-06	Gm26624
ENSMUST00000034763.8	101.949	0.739185	0.130441	5.66681	1.45478e-08	1.05969e-06	Rp9
ENSMUST00000105545.10	1040.68	-0.569232	0.100526	-5.66252	1.49162e-08	1.08439e-06	Phactr2
ENSMUST00000121315.1	30.1987	-6.27588	1.11073	-5.65025	1.60215e-08	1.16248e-06	Zfp758
ENSMUST00000043848.10	892.341	0.498923	0.0885126	5.63674	1.73295e-08	1.25494e-06	Ncapd2
ENSMUST00000201852.3	59.9275	-1.25998	0.223679	-5.63295	1.77148e-08	1.28035e-06	Limch1
ENSMUST00000054289.12	39.4627	1.51428	0.269243	5.6242	1.86372e-08	1.34441e-06	Rps2
ENSMUST00000186225.1	2453.72	-0.436139	0.0775768	-5.62203	1.88726e-08	1.35875e-06	Tnnt2
ENSMUST00000097653.10	1790.27	-0.781925	0.139131	-5.62006	1.90891e-08	1.37169e-06	Col6a3
ENSMUST00000045969.7	94.5185	-0.81955	0.145876	-5.61812	1.93045e-08	1.38449e-06	Zfp458
ENSMUST00000102505.9	108.923	-2.08673	0.371784	-5.61276	1.99126e-08	1.42536e-06	Myo1c
ENSMUST00000123826.1	33.9714	-3.89627	0.695196	-5.60456	2.08786e-08	1.49164e-06	Socs6
ENSMUST00000123434.2	657.962	0.350047	0.0625504	5.59624	2.19049e-08	1.56196e-06	Pirt
ENSMUST00000131676.7	210.169	-0.78449	0.140238	-5.59401	2.2189e-08	1.5792e-06	Gm4723
ENSMUST00000182155.7	219.433	-1.18179	0.211457	-5.5888	2.28641e-08	1.62413e-06	Ank3
ENSMUST00000027137.10	251.085	0.891657	0.159583	5.58742	2.30465e-08	1.63397e-06	Slc40a1
ENSMUST00000048079.13	17.5758	-7.21572	1.29207	-5.5846	2.34234e-08	1.65754e-06	Fam160a2
ENSMUST00000203079.1	125.235	1.23225	0.221105	5.57313	2.50202e-08	1.76717e-06	Gm44248
ENSMUST00000155660.7	107.269	1.03468	0.185787	5.56916	2.55977e-08	1.80454e-06	Gm6483
ENSMUST00000171466.1	9.58988	-5.57847	1.00408	-5.55581	2.76326e-08	1.94431e-06	Zfp595
ENSMUST00000097773.3	132.278	-0.94948	0.170929	-5.55482	2.77891e-08	1.94917e-06	Klhl21
ENSMUST00000097423.2	119.921	-0.844949	0.152114	-5.55472	2.78064e-08	1.94917e-06	Rsph3a
ENSMUST00000162558.7	203.151	-0.9145	0.164649	-5.55425	2.78799e-08	1.95065e-06	Gas5
ENSMUST00000130825.7	48.0218	1.29731	0.233632	5.5528	2.81137e-08	1.96332e-06	Gm13248
ENSMUST00000126213.7	7.57595	5.07898	0.914984	5.5509	2.842e-08	1.98099e-06	Lrrc27
ENSMUST00000050401.5	273.142	-0.565765	0.101956	-5.54909	2.8716e-08	1.99788e-06	She
ENSMUST00000061717.3	21.5172	1.94691	0.350926	5.54792	2.89087e-08	2.00754e-06	Pcdhb6
ENSMUST00000096148.10	11.5832	3.24207	0.584632	5.54548	2.93147e-08	2.03194e-06	Gm10338
ENSMUST00000033173.14	94.0744	0.639196	0.115344	5.54167	2.99604e-08	2.07284e-06	Polr3e
ENSMUST00000124341.7	127.131	-0.796274	0.143966	-5.531	3.18407e-08	2.19884e-06	Slc4a3
ENSMUST00000028280.13	1385.99	-0.600927	0.10868	-5.52933	3.21464e-08	2.21584e-06	Col5a1
ENSMUST00000131853.1	9.6076	-3.79607	0.68707	-5.52502	3.29453e-08	2.26671e-06	Rmnd1
ENSMUST00000121529.1	12.0245	7.09499	1.28578	5.51803	3.42821e-08	2.35433e-06	Hmox2
ENSMUST00000179869.1	1638.33	0.484335	0.0879472	5.50711	3.64781e-08	2.50053e-06	Hmgcs1
ENSMUST00000173695.1	44.2665	-1.84485	0.335321	-5.50174	3.76055e-08	2.57307e-06	Gm20400
ENSMUST00000074015.10	164.272	0.62996	0.114523	5.50074	3.78192e-08	2.58294e-06	Negr1
ENSMUST00000102854.9	250.978	-1.00695	0.18315	-5.49792	3.84298e-08	2.61984e-06	Crat
ENSMUST00000099002.9	348.989	-0.438062	0.0796903	-5.49705	3.86187e-08	2.62791e-06	Gm14420
ENSMUST00000121288.1	61.3286	-1.09347	0.198947	-5.4963	3.87841e-08	2.63434e-06	Fam167a
ENSMUST00000209053.1	17.1353	1.89632	0.345091	5.49513	3.90418e-08	2.64702e-06	4930453L07Rik
ENSMUST00000029196.4	45.1328	-1.31962	0.240196	-5.49394	3.93066e-08	2.66013e-06	Slc2a10
ENSMUST00000122309.1	21.9394	2.98745	0.544499	5.4866	4.09741e-08	2.76795e-06	Gm13157
ENSMUST00000211172.1	38.4717	-1.05593	0.192582	-5.48301	4.18154e-08	2.81966e-06	Cars2
ENSMUST00000174522.7	43.8396	6.53226	1.19233	5.47859	4.28726e-08	2.88572e-06	Gne
ENSMUST00000062254.2	680.567	-0.80798	0.14759	-5.47449	4.3878e-08	2.94806e-06	Clec14a
ENSMUST00000025830.7	82.4506	-1.29382	0.23646	-5.47163	4.45915e-08	2.9906e-06	Apba1
ENSMUST00000160429.7	38.7151	-2.64978	0.484642	-5.4675	4.56435e-08	3.05565e-06	Gas5
ENSMUST00000125693.7	124.445	0.773664	0.141525	5.46661	4.58727e-08	3.06548e-06	Pmpcb
ENSMUST00000107583.2	63.5334	1.1514	0.210755	5.46321	4.67594e-08	3.11356e-06	Cisd3
ENSMUST00000058914.8	1211.27	1.01019	0.184899	5.4635	4.66848e-08	3.11356e-06	Tuba1c
ENSMUST00000029848.4	72.1766	-1.09262	0.200486	-5.44989	5.04008e-08	3.35003e-06	Col24a1
ENSMUST00000145929.1	21.3664	1.61624	0.297696	5.42916	5.662e-08	3.7567e-06	Usp14
ENSMUST00000132803.1	34.1759	-1.93678	0.356877	-5.42703	5.73011e-08	3.79512e-06	Rps2
ENSMUST00000194476.1	31.3832	-1.14526	0.211337	-5.4191	5.98984e-08	3.95308e-06	Acbd6
ENSMUST00000034934.14	227.634	-0.70921	0.13087	-5.41918	5.98725e-08	3.95308e-06	Aph1b
ENSMUST00000138598.7	839.406	0.409062	0.075506	5.41761	6.04014e-08	3.97922e-06	Dynlt1c
ENSMUST00000173972.7	136.274	0.827068	0.152687	5.41674	6.06951e-08	3.99151e-06	Adamts10
ENSMUST00000103164.3	76.4601	-1.02227	0.18878	-5.41514	6.12422e-08	4.02038e-06	Acsf2
ENSMUST00000044443.14	540.425	-0.790467	0.146266	-5.40432	6.50551e-08	4.26317e-06	Ank2
ENSMUST00000045903.7	142.601	-0.736188	0.136346	-5.3994	6.68657e-08	4.37412e-06	Trak1
ENSMUST00000047497.14	147.727	-0.601764	0.111476	-5.39815	6.73298e-08	4.39675e-06	Cep104
ENSMUST00000097690.3	165.815	0.661968	0.122689	5.39548	6.83391e-08	4.45485e-06	Gm10557
ENSMUST00000108035.7	17.9186	-1.86837	0.346515	-5.39189	6.97201e-08	4.53693e-06	Ccl27a
ENSMUST00000063704.7	25.3641	-2.97932	0.552841	-5.38911	7.08094e-08	4.59977e-06	Gm13152
ENSMUST00000199941.4	8.10109	-3.28353	0.610467	-5.37871	7.50209e-08	4.86486e-06	AI506816
ENSMUST00000167898.1	19.3271	-1.67332	0.311226	-5.37654	7.59299e-08	4.91524e-06	Slc6a17
ENSMUST00000026710.11	475.143	-0.943172	0.17555	-5.37268	7.75735e-08	5.01292e-06	Usp16
ENSMUST00000153474.8	16.1454	-4.19326	0.780564	-5.37209	7.78292e-08	5.02073e-06	Snhg12
ENSMUST00000191436.6	105.673	1.05584	0.196622	5.36988	7.87871e-08	5.07372e-06	Ly6e
ENSMUST00000119008.1	27.1327	1.28366	0.239297	5.36431	8.12614e-08	5.22403e-06	Gm7645
ENSMUST00000137197.8	2011.52	-0.526239	0.0981154	-5.36347	8.16383e-08	5.23921e-06	Hmcn1
ENSMUST00000060537.12	1209.58	-0.525354	0.0981534	-5.35237	8.68091e-08	5.56146e-06	Kif1b
ENSMUST00000089688.5	757.179	-0.603444	0.112762	-5.35146	8.72462e-08	5.57986e-06	Mmp14
ENSMUST00000170686.7	8.47616	3.02894	0.566175	5.34983	8.80376e-08	5.62082e-06	Gm3453
ENSMUST00000034591.10	596.333	-0.44653	0.0835409	-5.34504	9.03955e-08	5.76148e-06	Bace1
ENSMUST00000140914.1	55.3176	1.02346	0.192175	5.32568	1.00574e-07	6.39927e-06	Ift57
ENSMUST00000030367.14	195.003	-0.454301	0.085312	-5.32517	1.00861e-07	6.40656e-06	Ssbp3
ENSMUST00000155008.1	166.153	10.0057	1.87928	5.32422	1.01385e-07	6.42891e-06	Gm10163
ENSMUST00000172531.1	10.9184	3.09663	0.583951	5.3029	1.1398e-07	7.21525e-06	1110038B12Rik
ENSMUST00000130846.8	385.734	-0.959336	0.181043	-5.29893	1.16481e-07	7.3596e-06	Col6a3
ENSMUST00000135924.1	103.825	0.846982	0.159848	5.29866	1.16656e-07	7.3596e-06	Ube2j1
ENSMUST00000097558.3	303.626	0.640532	0.121058	5.29111	1.21576e-07	7.65604e-06	Hmbs
ENSMUST00000180615.7	6.49054	3.61154	0.682605	5.29082	1.21766e-07	7.65604e-06	Gm26655
ENSMUST00000085412.5	33.9245	-1.1413	0.215771	-5.28941	1.2271e-07	7.7024e-06	Coch
ENSMUST00000135123.1	8.94968	3.8116	0.720859	5.28758	1.23948e-07	7.767e-06	Ppil1
ENSMUST00000020662.14	311.357	-0.662812	0.125636	-5.27566	1.32277e-07	8.27497e-06	Kremen1
ENSMUST00000202695.1	15.3894	2.04297	0.387402	5.27353	1.33824e-07	8.35774e-06	Tbc1d19
ENSMUST00000079788.5	14.5367	1.95059	0.370072	5.27083	1.35808e-07	8.46744e-06	Mkx
ENSMUST00000028499.10	1131.57	-0.474648	0.0900795	-5.26922	1.37008e-07	8.51393e-06	Itgav
ENSMUST00000191899.5	1236.48	-0.538202	0.102141	-5.26921	1.37012e-07	8.51393e-06	Dag1
ENSMUST00000029964.11	1080.65	0.427344	0.0812274	5.26108	1.43216e-07	8.88462e-06	Epha7
ENSMUST00000151894.7	976.824	0.405633	0.0771463	5.25798	1.45649e-07	9.02056e-06	Pfkp
ENSMUST00000125362.7	178.074	1.08671	0.206761	5.25589	1.47312e-07	9.10838e-06	Socs6
ENSMUST00000165117.7	786.318	-0.500515	0.0953245	-5.25065	1.51565e-07	9.35583e-06	Cdk6
ENSMUST00000065709.11	58.3731	7.28141	1.3873	5.24862	1.53245e-07	9.44388e-06	Gas5
ENSMUST00000163892.7	80.4709	-0.898146	0.171228	-5.24531	1.56018e-07	9.59884e-06	4930523C07Rik
ENSMUST00000161302.7	20.5992	1.41821	0.270451	5.24387	1.57242e-07	9.65821e-06	Fhit
ENSMUST00000127799.1	124.066	0.954046	0.181971	5.24283	1.5813e-07	9.69671e-06	Gm6483
ENSMUST00000029651.10	153.981	1.17402	0.223973	5.2418	1.59017e-07	9.73506e-06	Gstcd
ENSMUST00000085708.2	58.4302	-7.45433	1.42236	-5.24083	1.59859e-07	9.77055e-06	Stat2
ENSMUST00000008579.13	311.938	0.529772	0.101168	5.23653	1.6362e-07	9.98402e-06	Rdh13
ENSMUST00000144970.7	80.6846	0.651873	0.124554	5.23367	1.66173e-07	1.01232e-05	Cnot7
ENSMUST00000077874.14	68.6387	7.3117	1.39775	5.23106	1.68539e-07	1.02506e-05	Ptpmt1
ENSMUST00000033899.13	1373.44	-0.726664	0.139	-5.22778	1.71553e-07	1.04169e-05	Col4a2
ENSMUST00000110963.7	159.283	10.0674	1.92631	5.22624	1.72995e-07	1.04873e-05	Zkscan1
ENSMUST00000035625.6	49.4773	1.07179	0.205119	5.22521	1.73955e-07	1.05284e-05	Cyp7b1
ENSMUST00000050952.3	665.024	0.443875	0.084992	5.22255	1.76471e-07	1.06633e-05	Stbd1
ENSMUST00000076147.4	85.3648	-3.22461	0.617892	-5.21873	1.80153e-07	1.08681e-05	Ackr4
ENSMUST00000073109.11	208.162	-0.5927	0.113624	-5.21631	1.82525e-07	1.09935e-05	Ctdspl
ENSMUST00000039695.6	101.569	1.71837	0.329542	5.21443	1.84385e-07	1.10875e-05	Frem3
ENSMUST00000202599.3	7.91661	3.16289	0.606857	5.21192	1.86893e-07	1.12202e-05	Tbc1d19
ENSMUST00000055438.4	334.415	-0.507431	0.0974282	-5.20825	1.90628e-07	1.1426e-05	Ppm1e
ENSMUST00000184744.1	683.404	-0.893641	0.171783	-5.20216	1.96983e-07	1.17879e-05	Kctd12
ENSMUST00000035776.9	640.342	0.414276	0.0796993	5.19799	2.01457e-07	1.20363e-05	Dnttip2
ENSMUST00000078478.7	223.314	-0.980167	0.188815	-5.19115	2.08999e-07	1.24669e-05	Pxylp1
ENSMUST00000039631.8	4962.54	0.530907	0.102286	5.19043	2.09803e-07	1.24949e-05	Acta2
ENSMUST00000140656.7	17.8641	-1.54779	0.298421	-5.18661	2.14151e-07	1.27334e-05	Prmt3
ENSMUST00000181497.7	5.51477	5.10339	0.984368	5.18443	2.16676e-07	1.2863e-05	Gm26886
ENSMUST00000102821.3	86.8923	-0.992696	0.191497	-5.18387	2.17333e-07	1.28815e-05	Stk10
ENSMUST00000161172.2	9.71128	-2.3937	0.461845	-5.18292	2.18445e-07	1.29268e-05	Eif2s2
ENSMUST00000170051.7	199.317	-0.804748	0.155307	-5.18165	2.19932e-07	1.29941e-05	Cd36
ENSMUST00000176129.1	29.5224	-1.18472	0.228655	-5.18128	2.20374e-07	1.29996e-05	Zfp536
ENSMUST00000173220.2	22.1819	3.25827	0.629009	5.18	2.21884e-07	1.3068e-05	Nlrp5-ps
ENSMUST00000081564.12	929.148	-1.99164	0.384657	-5.1777	2.2464e-07	1.31886e-05	Postn
ENSMUST00000020717.11	157.789	-1.14327	0.220799	-5.17785	2.24453e-07	1.31886e-05	Arf5
ENSMUST00000131206.7	56.1365	-1.03122	0.199217	-5.17633	2.2629e-07	1.32645e-05	Usp16
ENSMUST00000023133.6	224.364	0.691074	0.133544	5.17487	2.28075e-07	1.33481e-05	Ppp1r1a
ENSMUST00000038628.3	135.943	-0.59154	0.114438	-5.16909	2.35238e-07	1.37458e-05	Man1c1
ENSMUST00000204433.2	19.8841	2.92492	0.565892	5.16869	2.35745e-07	1.37538e-05	Ldhb
ENSMUST00000181527.1	283.993	0.911015	0.17637	5.16537	2.39959e-07	1.39777e-05	Rian
ENSMUST00000178786.1	6076.3	1.43456	0.277809	5.16383	2.41948e-07	1.40716e-05	Gm25360
ENSMUST00000034932.13	45.3761	3.95516	0.766734	5.15844	2.49011e-07	1.44597e-05	Plscr2
ENSMUST00000032237.7	904.199	-0.323476	0.0627138	-5.15797	2.49648e-07	1.44741e-05	Bms1
ENSMUST00000176957.7	856.177	-0.65969	0.128056	-5.15156	2.58335e-07	1.49545e-05	Esd
ENSMUST00000184179.7	140.77	-0.711079	0.138545	-5.13249	2.85935e-07	1.65265e-05	Atpaf1
ENSMUST00000032125.6	699.976	-1.71766	0.334752	-5.13116	2.87964e-07	1.6618e-05	Bmp10
ENSMUST00000156442.7	17.6467	-6.05793	1.18161	-5.12684	2.94645e-07	1.69772e-05	Sec16a
ENSMUST00000022226.4	290.073	0.618193	0.120655	5.12363	2.99703e-07	1.7242e-05	Ppwd1
ENSMUST00000109007.7	587.811	-0.845508	0.165219	-5.1175	3.09607e-07	1.77843e-05	Gm2026
ENSMUST00000041804.7	323.195	-0.631043	0.123337	-5.11643	3.11373e-07	1.78581e-05	Lmtk2
ENSMUST00000109058.8	185.61	-0.974787	0.190931	-5.10545	3.30013e-07	1.88242e-05	Gm14391
ENSMUST00000031032.10	456.8	-0.36184	0.0708792	-5.10503	3.30746e-07	1.88242e-05	Ppm1g
ENSMUST00000181816.1	202.36	0.613648	0.120199	5.10528	3.30303e-07	1.88242e-05	Gm26659
ENSMUST00000181536.2	159.783	-0.600199	0.117567	-5.10514	3.30548e-07	1.88242e-05	Snhg18
ENSMUST00000181014.7	51.426	-0.807229	0.15811	-5.10548	3.29956e-07	1.88242e-05	D330041H03Rik
ENSMUST00000077730.6	311.736	-0.788895	0.15459	-5.10314	3.34071e-07	1.89844e-05	Pik3c2b
ENSMUST00000031542.12	8.17701	-3.35042	0.656974	-5.09978	3.40047e-07	1.92946e-05	Oasl2
ENSMUST00000057859.7	557.577	-0.277685	0.054484	-5.09663	3.45762e-07	1.9589e-05	Frmd6
ENSMUST00000145709.7	232.015	-0.529478	0.103908	-5.09563	3.47584e-07	1.96623e-05	Rac1
ENSMUST00000137463.7	58.6777	1.03802	0.20375	5.09458	3.49509e-07	1.97411e-05	Gm14230
ENSMUST00000027467.10	1016.19	0.33264	0.0653183	5.0926	3.53183e-07	1.99184e-05	Serpine2
ENSMUST00000156899.1	408.465	0.440394	0.0864933	5.09165	3.54952e-07	1.99879e-05	Tpm1
ENSMUST00000140809.1	170.26	0.606134	0.11913	5.08801	3.61832e-07	2.03446e-05	Qsox1
ENSMUST00000081170.8	522.266	-0.759232	0.149267	-5.08642	3.64893e-07	2.04858e-05	Sgcb
ENSMUST00000057279.5	225.438	-0.603083	0.118804	-5.0763	3.84851e-07	2.15737e-05	Olfml2a
ENSMUST00000117291.7	234.133	0.673144	0.132704	5.07252	3.92575e-07	2.19406e-05	Mthfd1l
ENSMUST00000007797.9	93.343	0.878156	0.173113	5.07273	3.92157e-07	2.19406e-05	Gabrb2
ENSMUST00000024004.8	16.1777	3.64152	0.718362	5.0692	3.9949e-07	2.22936e-05	Ccl25
ENSMUST00000105739.7	114.272	-1.26839	0.250386	-5.06573	4.06836e-07	2.26695e-05	Gm13212
ENSMUST00000141212.1	29.4814	1.25738	0.24831	5.06374	4.11106e-07	2.28732e-05	Rad51ap1
ENSMUST00000131648.7	193.352	0.617288	0.121966	5.06114	4.16747e-07	2.31525e-05	Pfkp
ENSMUST00000197531.1	166.936	0.530142	0.1048	5.05862	4.22292e-07	2.34255e-05	Metap1
ENSMUST00000099931.9	355.429	-0.483547	0.0956868	-5.05344	4.33924e-07	2.39993e-05	Sesn1
ENSMUST00000144164.7	38.6185	-2.55627	0.505823	-5.05369	4.33353e-07	2.39993e-05	Lyrm7
ENSMUST00000087527.10	281.963	-1.14726	0.227071	-5.05241	4.36266e-07	2.4093e-05	Abcc9
ENSMUST00000180046.7	348.512	10.971	2.17238	5.05022	4.41298e-07	2.43348e-05	Usp34
ENSMUST00000056328.5	136.705	-0.740973	0.147331	-5.02931	4.9225e-07	2.71043e-05	Rnf26
ENSMUST00000135218.7	67.9891	-0.917044	0.182538	-5.02386	5.06436e-07	2.78442e-05	Mlh1
ENSMUST00000029463.12	77.7374	3.28788	0.654812	5.02111	5.13729e-07	2.82036e-05	Hsd3b6
ENSMUST00000144307.1	101.663	0.773523	0.154391	5.01015	5.4388e-07	2.98149e-05	Gm6483
ENSMUST00000199942.4	92.9321	1.35433	0.270404	5.00853	5.4848e-07	3.00228e-05	Lgi2
ENSMUST00000194989.1	479.448	0.813057	0.162344	5.00824	5.49298e-07	3.00234e-05	Gm37761
ENSMUST00000162592.7	74.81	-0.959203	0.192102	-4.9932	5.9388e-07	3.24126e-05	Zfp27
ENSMUST00000040188.14	20.439	-5.95486	1.19339	-4.98988	6.04174e-07	3.29262e-05	Ska1
ENSMUST00000135737.1	10.3193	2.14028	0.429234	4.98628	6.15534e-07	3.34962e-05	Upp2
ENSMUST00000184517.7	180.357	1.17728	0.236121	4.98592	6.16675e-07	3.35093e-05	Zfp280d
ENSMUST00000198383.1	38.9221	1.2561	0.252196	4.98067	6.33643e-07	3.43311e-05	Gm42944
ENSMUST00000063957.5	711.38	1.92897	0.38727	4.98093	6.32793e-07	3.43311e-05	Hbb-bh1
ENSMUST00000046497.6	45.5294	0.946558	0.19009	4.97954	6.37365e-07	3.44825e-05	Dnph1
ENSMUST00000101281.2	13.9812	1.59691	0.320938	4.97574	6.49979e-07	3.5114e-05	Gm10451
ENSMUST00000174609.8	56.2005	-3.55137	0.714569	-4.96995	6.69703e-07	3.61271e-05	Rps18
ENSMUST00000109554.1	402.084	-0.54471	0.109656	-4.96746	6.7835e-07	3.65406e-05	Zc3h7b
ENSMUST00000125040.7	670.943	1.39505	0.280925	4.96592	6.83761e-07	3.67788e-05	Pcnp
ENSMUST00000035027.12	19.5161	1.37781	0.27759	4.96348	6.92416e-07	3.71907e-05	Clstn2
ENSMUST00000026062.9	190.417	-0.549865	0.110909	-4.95781	7.12926e-07	3.82371e-05	Casp7
ENSMUST00000073551.5	277.443	-0.814081	0.164322	-4.95418	7.26347e-07	3.89008e-05	Zfp386
ENSMUST00000099449.3	476.233	0.34685	0.0700179	4.95374	7.28017e-07	3.89342e-05	Zfp808
ENSMUST00000069486.12	83.2757	0.640273	0.129271	4.95296	7.30938e-07	3.90344e-05	Gemin6
ENSMUST00000053177.13	801.516	-0.542928	0.109704	-4.949	7.45941e-07	3.97785e-05	Wdfy3
ENSMUST00000108435.1	38.9447	1.08704	0.21966	4.94872	7.47017e-07	3.97789e-05	Tlcd2
ENSMUST00000105721.8	25.4548	1.55292	0.314098	4.94407	7.65069e-07	4.0682e-05	Gm13152
ENSMUST00000127404.7	20.9028	1.3981	0.283381	4.93362	8.07193e-07	4.28607e-05	Tmsb15l
ENSMUST00000203734.1	17.8688	-2.25288	0.456777	-4.93214	8.13354e-07	4.30649e-05	Gm44958
ENSMUST00000110476.3	110.421	-1.93239	0.391778	-4.93234	8.12496e-07	4.30649e-05	Hist1h2bm
ENSMUST00000048067.9	28.0128	5.41049	1.09711	4.93159	8.15612e-07	4.31232e-05	Zcchc12
ENSMUST00000099009.8	786.447	-0.354441	0.0719564	-4.92577	8.40281e-07	4.43645e-05	2210418O10Rik
ENSMUST00000111024.9	196.465	-0.799489	0.162401	-4.92293	8.52599e-07	4.4951e-05	Enah
ENSMUST00000021262.9	114.56	-0.61074	0.124071	-4.9225	8.54465e-07	4.49857e-05	Alox8
ENSMUST00000150411.1	7.03324	3.95452	0.80454	4.91525	8.86671e-07	4.66153e-05	Gm10167
ENSMUST00000139161.1	32.0217	6.05387	1.23397	4.906	9.29544e-07	4.88004e-05	Ntan1
ENSMUST00000130870.1	310.39	0.53842	0.109903	4.89903	9.63097e-07	5.04907e-05	Gm14226
ENSMUST00000023407.11	136.411	0.672972	0.137414	4.89741	9.71071e-07	5.08371e-05	Mina
ENSMUST00000037942.10	158.285	0.627179	0.128163	4.89361	9.90005e-07	5.17556e-05	Ttll7
ENSMUST00000134115.7	586.406	0.285905	0.058454	4.89111	1.00271e-06	5.23462e-05	Cnih4
ENSMUST00000152943.7	26.1377	-1.6716	0.342054	-4.88693	1.02419e-06	5.33929e-05	Snhg3
ENSMUST00000152159.7	30.3934	1.3921	0.285045	4.88379	1.04063e-06	5.41741e-05	Megf6
ENSMUST00000189732.6	246.683	-1.46086	0.299282	-4.88121	1.05435e-06	5.48116e-05	Tnnt2
ENSMUST00000040860.1	31.8637	1.0383	0.212843	4.87825	1.07033e-06	5.55647e-05	Psma8
ENSMUST00000099195.9	309.055	0.497998	0.102112	4.87697	1.07729e-06	5.5848e-05	Pde7a
ENSMUST00000154125.1	10.3253	-2.46865	0.506482	-4.87412	1.09294e-06	5.65804e-05	A730017C20Rik
ENSMUST00000190495.1	106.115	-1.12357	0.230649	-4.87134	1.10845e-06	5.73039e-05	Mcm6
ENSMUST00000146088.7	79.0108	-0.731478	0.150187	-4.87044	1.11348e-06	5.74842e-05	Ttc38
ENSMUST00000158992.1	4644.59	0.775916	0.159369	4.86868	1.12349e-06	5.79204e-05	Scarna10
ENSMUST00000020343.7	130.896	-0.867254	0.178291	-4.86425	1.1489e-06	5.91485e-05	Rab21
ENSMUST00000128334.7	68.7246	1.02275	0.210359	4.86196	1.16229e-06	5.9755e-05	Usp14
ENSMUST00000183215.7	154.669	-1.5116	0.310976	-4.86083	1.16897e-06	6.00158e-05	Rian
ENSMUST00000163080.2	637.537	-0.952082	0.196001	-4.85753	1.18859e-06	6.09389e-05	1110002E22Rik
ENSMUST00000173122.1	12.0293	1.91099	0.39375	4.8533	1.21426e-06	6.21696e-05	Rpp21
ENSMUST00000189821.6	82.2546	-8.86126	1.82711	-4.84987	1.23542e-06	6.31658e-05	Fn1
ENSMUST00000171384.7	286.499	-0.897555	0.185107	-4.84885	1.24179e-06	6.34047e-05	Tm4sf1
ENSMUST00000152499.7	65.0661	0.817598	0.168749	4.84506	1.26576e-06	6.454e-05	Cttnbp2
ENSMUST00000199631.1	83.8726	-0.848207	0.175118	-4.84362	1.27493e-06	6.49185e-05	Gm15903
ENSMUST00000112138.7	1052.09	0.419988	0.0867212	4.84297	1.27914e-06	6.49551e-05	Dync1i2
ENSMUST00000143410.6	117.522	-2.25217	0.465016	-4.84322	1.2775e-06	6.49551e-05	Tnni3k
ENSMUST00000048073.8	256.055	-0.777641	0.160919	-4.83251	1.34822e-06	6.83697e-05	Pigs
ENSMUST00000026886.7	754.701	-0.34779	0.0720779	-4.8252	1.39864e-06	7.08302e-05	Itih5
ENSMUST00000181149.1	662.268	-0.412461	0.085487	-4.82483	1.40121e-06	7.08637e-05	B230354K17Rik
ENSMUST00000049031.5	542.046	-0.542819	0.112518	-4.8243	1.40495e-06	7.09568e-05	Fam63b
ENSMUST00000149301.7	411.975	-0.567358	0.117655	-4.82222	1.4197e-06	7.15146e-05	AI314180
ENSMUST00000074352.10	308.347	0.563874	0.116933	4.8222	1.41984e-06	7.15146e-05	Osbpl1a
ENSMUST00000126893.7	19.4586	-1.83372	0.380751	-4.81607	1.46415e-06	7.36469e-05	Stk38
ENSMUST00000185367.1	85.8136	0.748201	0.155428	4.81381	1.48083e-06	7.43853e-05	Glrx2
ENSMUST00000111861.3	162.012	-0.713288	0.148299	-4.80979	1.51089e-06	7.57931e-05	Pdcd6ip
ENSMUST00000065420.11	65.5497	-8.65486	1.80001	-4.80823	1.52271e-06	7.6283e-05	Hjurp
ENSMUST00000163392.1	198.007	0.655245	0.136422	4.80309	1.56235e-06	7.81636e-05	3830406C13Rik
ENSMUST00000132704.1	17.1238	1.33772	0.279769	4.7815	1.73991e-06	8.69299e-05	Necap2
ENSMUST00000053426.14	350.429	-0.681902	0.142657	-4.78001	1.75285e-06	8.74592e-05	Pptc7
ENSMUST00000152497.1	36.2422	1.04499	0.218815	4.77567	1.79106e-06	8.9246e-05	Mrps10
ENSMUST00000035010.8	1857.99	-0.497169	0.104283	-4.76748	1.86549e-06	9.28305e-05	Stt3b
ENSMUST00000099337.3	453.316	-0.320083	0.067145	-4.76704	1.8695e-06	9.29061e-05	Plxnc1
ENSMUST00000149393.1	25.5626	1.16948	0.245544	4.76282	1.90902e-06	9.47435e-05	Nfxl1
ENSMUST00000031653.11	293.61	-0.807239	0.16951	-4.76218	1.91516e-06	9.49213e-05	Flt1
ENSMUST00000016168.8	79.5455	-1.03844	0.218078	-4.76177	1.91902e-06	9.49862e-05	Lbp
ENSMUST00000178600.1	10.0959	2.14215	0.450357	4.75656	1.96919e-06	9.73401e-05	Gm17045
ENSMUST00000166873.8	91.4202	1.43277	0.301354	4.75443	1.99007e-06	9.82419e-05	Cdh10
ENSMUST00000051504.7	243.039	-0.589481	0.124013	-4.75337	2.00055e-06	9.86283e-05	Ecm2
ENSMUST00000073924.9	135.408	0.583977	0.12289	4.75203	2.01387e-06	9.91538e-05	2810021J22Rik
ENSMUST00000029777.13	31.3084	-1.44717	0.304629	-4.75061	2.02808e-06	9.97216e-05	Tmem56
ENSMUST00000183148.7	53.666	-8.95852	1.88685	-4.74786	2.05576e-06	0.000100949	Ank3
ENSMUST00000047286.6	14.237	2.10902	0.444417	4.74557	2.07916e-06	0.000101964	Mat1a
ENSMUST00000108335.7	382.573	1.39609	0.294222	4.74501	2.085e-06	0.000102115	Asph
ENSMUST00000042792.6	426.986	0.672241	0.141708	4.74386	2.09682e-06	0.00010256	Scn7a
ENSMUST00000012314.8	369.138	-0.744459	0.156963	-4.74289	2.10689e-06	0.000102917	Zfp729a
ENSMUST00000001009.13	11.1984	-2.2182	0.46833	-4.7364	2.17551e-06	0.000106129	Wfdc18
ENSMUST00000176629.7	37.2088	-8.33655	1.76076	-4.73462	2.19468e-06	0.000106924	Zc3h18
ENSMUST00000023353.3	1080.88	0.267526	0.0565199	4.7333	2.209e-06	0.000107482	Mcm4
ENSMUST00000194418.1	167.537	-0.533419	0.112783	-4.72961	2.24954e-06	0.000109311	Pcdhga4
ENSMUST00000200773.1	40.4861	-8.4862	1.79486	-4.72805	2.26683e-06	0.000110008	Gm43694
ENSMUST00000033923.13	944.028	-0.476494	0.100857	-4.72446	2.30726e-06	0.000111824	Dlc1
ENSMUST00000099078.9	570.384	-0.394956	0.0836129	-4.72362	2.31685e-06	0.000112143	Arfgef2
ENSMUST00000098119.3	11.2305	-5.64771	1.19647	-4.72031	2.35483e-06	0.000113833	Gm3883
ENSMUST00000093019.5	10.6275	-2.24336	0.475642	-4.71648	2.39955e-06	0.000115845	Fam83g
ENSMUST00000111775.7	44.8535	7.80719	1.65689	4.71195	2.45357e-06	0.000118299	Xpr1
ENSMUST00000191138.6	59.4241	-7.33243	1.55647	-4.71093	2.46588e-06	0.000118739	Hivep2
ENSMUST00000037666.5	272.795	-0.459129	0.0975325	-4.70745	2.50839e-06	0.00012063	Mfhas1
ENSMUST00000023722.11	67.0941	-0.993347	0.211153	-4.70439	2.54628e-06	0.000122136	Zfp641
ENSMUST00000037057.13	182.527	-0.611156	0.129906	-4.70461	2.54354e-06	0.000122136	Zfp40
ENSMUST00000078988.8	80.3867	-8.7124	1.85438	-4.69829	2.62349e-06	0.000125677	Lpp
ENSMUST00000021820.12	759.902	-0.790561	0.168338	-4.69627	2.64957e-06	0.000126764	Aspn
ENSMUST00000192733.1	11.8898	-2.19624	0.468047	-4.69235	2.70091e-06	0.000129054	Gm38046
ENSMUST00000171428.7	17.8343	2.2649	0.482804	4.69115	2.7168e-06	0.000129647	Gm8206
ENSMUST00000095737.3	1874.92	-0.381741	0.0814682	-4.68576	2.78923e-06	0.000132933	Akap6
ENSMUST00000100489.3	1249.62	-0.410834	0.087734	-4.68273	2.83083e-06	0.000134743	Rac1
ENSMUST00000079443.5	16.1594	-2.92023	0.624221	-4.67819	2.89412e-06	0.00013758	Mid1
ENSMUST00000027581.6	26.7174	1.09514	0.234109	4.67791	2.89816e-06	0.000137596	Gpr39
ENSMUST00000207917.1	60.9703	-0.839373	0.179512	-4.67586	2.92727e-06	0.000138801	Kcnb1
ENSMUST00000046792.8	500.815	-0.625676	0.133909	-4.67241	2.97683e-06	0.000140972	Olfml2b
ENSMUST00000097218.6	41.4768	1.34588	0.288306	4.66823	3.03799e-06	0.000143685	Gm9008
ENSMUST00000211729.1	12.8295	-1.85711	0.397902	-4.66726	3.0524e-06	0.000144183	NA
ENSMUST00000106061.8	544.678	0.277522	0.0594759	4.66612	3.06936e-06	0.000144801	S100pbp
ENSMUST00000163325.7	8.15884	3.14571	0.674593	4.66312	3.11457e-06	0.000146747	Gm9602
ENSMUST00000097442.8	561.259	-0.536141	0.115032	-4.66078	3.1501e-06	0.000148234	Ptpn14
ENSMUST00000107170.2	487.52	0.375852	0.0807195	4.65627	3.21993e-06	0.000151329	Setdb1
ENSMUST00000198445.4	24.9507	1.30102	0.279537	4.65418	3.25278e-06	0.000152609	Crb1
ENSMUST00000137641.7	22.4106	1.79926	0.386605	4.65401	3.25537e-06	0.000152609	Xlr3b
ENSMUST00000052872.13	410.063	-0.881255	0.189433	-4.65207	3.28622e-06	0.000153861	Obscn
ENSMUST00000049040.13	287.425	-0.442271	0.0951103	-4.65009	3.31798e-06	0.000155153	Bri3bp
ENSMUST00000034944.8	38.3849	-1.71846	0.37003	-4.64411	3.41537e-06	0.000159507	Dapk2
ENSMUST00000209525.1	143.484	0.52726	0.113586	4.64196	3.45123e-06	0.00016098	Prosc
ENSMUST00000136438.7	7.66786	6.50874	1.40302	4.63911	3.49921e-06	0.000163013	2610035D17Rik
ENSMUST00000027989.12	231.908	0.598113	0.128994	4.63675	3.53929e-06	0.000164674	Hsd17b7
ENSMUST00000108268.9	118.118	-0.931992	0.201121	-4.63399	3.58682e-06	0.000166677	Lgals9
ENSMUST00000028392.7	2153.08	-0.504509	0.108911	-4.63228	3.61654e-06	0.000167849	Dnajc10
ENSMUST00000129854.1	28.9706	-3.26273	0.704578	-4.63076	3.64322e-06	0.000168876	Serinc3
ENSMUST00000053871.3	602.592	-0.501983	0.108435	-4.62936	3.66793e-06	0.000169811	Ckap4
ENSMUST00000102703.1	111.994	-0.663716	0.143413	-4.62799	3.6924e-06	0.000170731	Zfp39
ENSMUST00000134720.7	7478.43	1.21671	0.262986	4.62654	3.71829e-06	0.000171715	Ttn
ENSMUST00000102818.10	190.787	0.686597	0.148447	4.6252	3.74241e-06	0.000172615	St6galnac4
ENSMUST00000107041.4	1032.7	-5.52184	1.19487	-4.62129	3.81352e-06	0.000175677	Gm7336
ENSMUST00000191829.1	74.5884	-1.31937	0.285532	-4.62075	3.82359e-06	0.000175923	Dchs2
ENSMUST00000008024.6	24.1309	-5.10717	1.10578	-4.61863	3.86284e-06	0.000177509	Arid1a
ENSMUST00000137119.2	213.184	-0.829088	0.179571	-4.61706	3.89222e-06	0.000178639	Kif1c
ENSMUST00000186303.6	53.4987	1.01028	0.219393	4.60491	4.12653e-06	0.00018916	Gm28557
ENSMUST00000040423.11	148.134	-0.61209	0.13297	-4.60323	4.15987e-06	0.000190453	Cd59a
ENSMUST00000167595.8	1376.66	0.697609	0.151668	4.59957	4.23358e-06	0.00019359	Fyco1
ENSMUST00000094463.4	84.2185	-1.02864	0.223891	-4.59437	4.34052e-06	0.000198236	Mn1
ENSMUST00000003360.9	11.22	1.67788	0.3655	4.59064	4.41891e-06	0.000201569	Car11
ENSMUST00000184678.1	8.77276	4.09179	0.894993	4.57187	4.83399e-06	0.000220233	1500015A07Rik
ENSMUST00000118286.7	350.33	-0.544338	0.119145	-4.56871	4.90726e-06	0.000223299	Mfn1
ENSMUST00000195470.1	24.8593	-1.08369	0.237267	-4.5674	4.9382e-06	0.000224432	Gm37924
ENSMUST00000120990.1	142.473	0.595217	0.130513	4.56059	5.10112e-06	0.000231554	Olfml1
ENSMUST00000098495.9	691.293	-0.434269	0.0952504	-4.55924	5.13393e-06	0.000232759	Snap91
ENSMUST00000097393.9	96.5619	-0.889612	0.195256	-4.55613	5.21037e-06	0.000235937	Ermard
ENSMUST00000032469.12	203.051	0.545655	0.119827	4.55371	5.27079e-06	0.000238383	Mbd4
ENSMUST00000144886.1	68.9656	-1.21583	0.267227	-4.54981	5.36947e-06	0.000242257	Usp16
ENSMUST00000145347.7	8.08971	-6.24204	1.37187	-4.55003	5.36385e-06	0.000242257	Mtcl1
ENSMUST00000036003.7	352.509	-0.478003	0.105095	-4.54828	5.4085e-06	0.000243618	Klhl42
ENSMUST00000017637.12	1008.5	-0.416066	0.0914808	-4.54812	5.41271e-06	0.000243618	Igfbp4
ENSMUST00000195955.1	69.46	0.909175	0.200024	4.54533	5.485e-06	0.000246573	Zgrf1
ENSMUST00000045665.12	1057.12	-0.381402	0.0839717	-4.54203	5.57163e-06	0.000250166	Ppp1r12b
ENSMUST00000094815.4	1083.01	0.32288	0.0711114	4.54048	5.61267e-06	0.000251705	Sae1
ENSMUST00000102558.10	19.2379	-5.51216	1.2141	-4.54014	5.62176e-06	0.000251809	Mink1
ENSMUST00000045487.3	684.959	0.323013	0.0711849	4.53766	5.68815e-06	0.000254308	Rhou
ENSMUST00000042167.9	509.464	-0.667581	0.147124	-4.53755	5.69121e-06	0.000254308	Cpq
ENSMUST00000121148.7	29.0545	4.15071	0.915018	4.53621	5.72747e-06	0.000255621	Sgcg
ENSMUST00000006991.8	126.046	0.863033	0.190486	4.5307	5.87879e-06	0.000262061	Hcn1
ENSMUST00000062350.14	42.6393	3.95561	0.873688	4.52748	5.96899e-06	0.000265763	Zscan21
ENSMUST00000099166.8	13.0845	3.8076	0.841707	4.52367	6.07765e-06	0.000270278	Ddx4
ENSMUST00000146865.1	207.313	0.594654	0.131483	4.52267	6.10647e-06	0.000271235	Prkar2b
ENSMUST00000058307.14	7.22931	6.36421	1.40779	4.52071	6.16329e-06	0.000273433	Inpp4a
ENSMUST00000138615.7	18.3528	-4.88553	1.08096	-4.5196	6.19559e-06	0.000274539	Zfp326
ENSMUST00000201422.3	178.655	0.708714	0.157081	4.51177	6.42879e-06	0.000284533	Rab28
ENSMUST00000145846.1	161.201	0.547856	0.121461	4.51054	6.46621e-06	0.00028585	Vmp1
ENSMUST00000149258.1	12.1556	-1.82012	0.403956	-4.50573	6.61459e-06	0.000292062	Mid1
ENSMUST00000047799.11	330.217	-0.789956	0.175398	-4.5038	6.67505e-06	0.000294382	Acad11
ENSMUST00000177786.7	47.6038	1.93453	0.429976	4.49916	6.82228e-06	0.000300519	Gm2956
ENSMUST00000110960.8	94.9755	-5.80524	1.29265	-4.49096	7.09038e-06	0.00031196	Zscan21
ENSMUST00000033342.6	326.298	-0.498939	0.111163	-4.48837	7.17699e-06	0.000315328	Eif3f
ENSMUST00000099046.3	30.8374	1.83373	0.40857	4.48817	7.18386e-06	0.000315328	Gm10718
ENSMUST00000030317.13	164.899	-0.588985	0.131254	-4.48739	7.21019e-06	0.00031611	Pdpn
ENSMUST00000163238.7	39.6517	-8.62835	1.92412	-4.48432	7.31482e-06	0.00032032	Mdm1
ENSMUST00000124638.7	318.594	0.457661	0.102294	4.47396	7.67824e-06	0.000335839	Setdb1
ENSMUST00000028178.13	470.351	0.698138	0.156195	4.46967	7.83412e-06	0.000341854	Acvr1c
ENSMUST00000199406.4	547.231	0.695713	0.155646	4.46984	7.82789e-06	0.000341854	Anapc5
ENSMUST00000109958.2	10.6458	-2.26005	0.505854	-4.46779	7.90315e-06	0.000344462	Serpina3i
ENSMUST00000032386.10	138.707	-0.661762	0.148197	-4.46543	7.99083e-06	0.000347877	Bhlhe41
ENSMUST00000002368.15	55.0264	-1.37384	0.307743	-4.46426	8.03443e-06	0.000349366	Dbf4
ENSMUST00000114186.8	1804.68	-0.890715	0.199581	-4.46293	8.08453e-06	0.000351135	Smyd1
ENSMUST00000195912.1	16.809	-2.25898	0.506893	-4.45651	8.33031e-06	0.000361022	Capza1
ENSMUST00000196136.1	29.3028	-1.00958	0.226543	-4.45648	8.33158e-06	0.000361022	Gm42683
ENSMUST00000027269.6	220.425	1.00968	0.22666	4.4546	8.40501e-06	0.000363358	Mstn
ENSMUST00000174464.1	62.8164	0.873272	0.196036	4.45466	8.40251e-06	0.000363358	1110038B12Rik
ENSMUST00000020843.12	980.385	0.316866	0.0712157	4.44938	8.61179e-06	0.000371866	Acaca
ENSMUST00000041874.8	89.2343	-0.878064	0.197401	-4.44811	8.66283e-06	0.000373636	Npl
ENSMUST00000034243.5	292.116	-0.773207	0.174001	-4.44368	8.84334e-06	0.00038098	Mmp15
ENSMUST00000111435.8	403.424	-1.20783	0.272507	-4.43228	9.32398e-06	0.000401115	Mpzl1
ENSMUST00000065987.13	824.499	0.414227	0.0934607	4.43209	9.33227e-06	0.000401115	Abat
ENSMUST00000192427.1	36.2578	-0.83694	0.188918	-4.43018	9.41524e-06	0.000404215	Gm37381
ENSMUST00000141011.1	16.3699	-1.37349	0.310071	-4.4296	9.44089e-06	0.000404849	Gm15545
ENSMUST00000003561.9	14.358	1.74976	0.395079	4.42889	9.4718e-06	0.000405707	Phyhip
ENSMUST00000197511.1	19.7125	5.56822	1.25734	4.42857	9.48583e-06	0.000405841	Emcn
ENSMUST00000144166.7	27.3053	0.97282	0.219688	4.42819	9.50256e-06	0.00040609	Gm13166
ENSMUST00000153997.7	17.4578	-1.4019	0.316726	-4.42623	9.58945e-06	0.000409162	Gm20878
ENSMUST00000136929.7	120.628	0.728983	0.164706	4.42596	9.60125e-06	0.000409162	Gm6483
ENSMUST00000069309.13	66.8803	8.24595	1.86314	4.42583	9.60742e-06	0.000409162	Uty
ENSMUST00000141815.1	28.8186	2.74413	0.620199	4.42459	9.66252e-06	0.000411038	Zfp952
ENSMUST00000102542.9	130.315	-1.10549	0.249907	-4.42361	9.70671e-06	0.000412447	Dph6
ENSMUST00000090469.6	102.358	0.642513	0.145269	4.4229	9.73835e-06	0.000413319	Myoz1
ENSMUST00000145295.1	89.9362	-0.984447	0.222732	-4.41988	9.87556e-06	0.000418665	Col4a2
ENSMUST00000194923.1	15.7038	1.60914	0.364413	4.4157	1.00682e-05	0.000426344	Gm36952
ENSMUST00000198677.1	28.8905	-1.6834	0.381285	-4.41506	1.00981e-05	0.000427127	Gm42428
ENSMUST00000188182.6	17.8327	5.35797	1.21376	4.41436	1.0131e-05	0.00042803	Ddx3y
ENSMUST00000207126.1	66.1709	-0.84315	0.191018	-4.41399	1.01483e-05	0.000428276	Qars
ENSMUST00000027065.11	37.1134	0.977578	0.221519	4.41306	1.0192e-05	0.000429632	Tmem14a
ENSMUST00000109109.7	27.1899	-1.4437	0.327459	-4.4088	1.03947e-05	0.000437681	Nudt7
ENSMUST00000183169.7	59.738	8.66178	1.9664	4.40488	1.0584e-05	0.000445151	Ank3
ENSMUST00000167816.7	23.423	-1.50332	0.341342	-4.40413	1.06208e-05	0.000446194	Wdr25
ENSMUST00000048657.8	1000.96	-0.224417	0.0509666	-4.40321	1.0666e-05	0.000447202	Sec24c
ENSMUST00000183189.1	33.1587	-0.992728	0.225458	-4.40315	1.06688e-05	0.000447202	Birc6
ENSMUST00000160457.8	268.484	0.735869	0.167226	4.40043	1.08035e-05	0.000452337	Zfp945
ENSMUST00000124469.1	16.041	1.46666	0.333323	4.40011	1.08195e-05	0.000452498	Mccc1os
ENSMUST00000058897.10	13.7687	1.85345	0.421953	4.39254	1.12031e-05	0.000468017	Pilra
ENSMUST00000180670.1	46.3719	0.90015	0.204981	4.39139	1.12628e-05	0.000469983	Gm10687
ENSMUST00000153166.7	23.5113	6.79807	1.54898	4.38874	1.1401e-05	0.000475217	Fgfr2
ENSMUST00000029666.13	380.859	-0.929008	0.211898	-4.38421	1.16405e-05	0.000484657	Papss1
ENSMUST00000055190.7	69.454	-0.609208	0.139052	-4.38116	1.18049e-05	0.000490531	Baiap2l1
ENSMUST00000034590.2	1021.93	0.570108	0.130129	4.3811	1.18079e-05	0.000490531	Tagln
ENSMUST00000209003.1	9.35667	-3.045	0.695162	-4.38028	1.18527e-05	0.000491842	Ptov1
ENSMUST00000031668.9	5614.82	-0.589243	0.134587	-4.37815	1.19692e-05	0.000495668	Col1a2
ENSMUST00000093853.4	68.1477	0.725904	0.165803	4.37811	1.19716e-05	0.000495668	Nxpe4
ENSMUST00000088480.3	366.456	-9.50322	2.17091	-4.37753	1.20034e-05	0.000496436	Rpl15-ps3
ENSMUST00000074241.8	24.2197	2.96848	0.678371	4.37589	1.20936e-05	0.000499609	Thnsl2
ENSMUST00000014957.8	78.18	-0.761751	0.174117	-4.37493	1.21472e-05	0.000501269	Stc1
ENSMUST00000001181.12	508.934	-0.817462	0.186902	-4.37375	1.22132e-05	0.000503433	Col6a2
ENSMUST00000203289.1	30.0593	-1.02088	0.233553	-4.37107	1.23638e-05	0.000509077	Gm43961
ENSMUST00000124925.7	854.497	0.406112	0.0929265	4.37025	1.24102e-05	0.000510424	Hexdc
ENSMUST00000145952.1	27.7104	-1.18927	0.272224	-4.3687	1.24987e-05	0.000513495	Zfp420
ENSMUST00000124830.1	4468.09	-0.523366	0.119839	-4.36725	1.25818e-05	0.00051634	Dsp
ENSMUST00000139113.7	8.25102	-6.33168	1.45101	-4.36363	1.27923e-05	0.000524402	Rpgrip1l
ENSMUST00000036248.12	81.7519	-0.779716	0.178861	-4.35933	1.3046e-05	0.000534213	Pmepa1
ENSMUST00000211716.1	12.2489	-5.16822	1.18692	-4.3543	1.33491e-05	0.000546023	Kdelr1
ENSMUST00000030676.7	55.0654	-1.15005	0.264143	-4.3539	1.33738e-05	0.000546431	Grik3
ENSMUST00000184613.1	63.7364	-0.865482	0.199068	-4.34766	1.37597e-05	0.000561581	Mrip-ps
ENSMUST00000079780.9	355.074	0.697732	0.160555	4.34574	1.38806e-05	0.000565898	B3gnt5
ENSMUST00000031388.12	447.968	0.329918	0.0759823	4.34204	1.41163e-05	0.000574509	Vps33a
ENSMUST00000099466.9	99.9107	-0.786923	0.181237	-4.34194	1.41227e-05	0.000574509	Sorbs1
ENSMUST00000200209.4	27.6439	-6.60987	1.52314	-4.33962	1.42727e-05	0.00057977	Rabggtb
ENSMUST00000084519.6	537.53	0.457663	0.105465	4.33946	1.42832e-05	0.00057977	Wdr11
ENSMUST00000117060.1	17.7345	-1.75856	0.405295	-4.33895	1.43162e-05	0.000579845	Gm11841
ENSMUST00000129984.1	42.4815	1.27341	0.293481	4.33897	1.43149e-05	0.000579845	Rps2
ENSMUST00000058639.9	49.2262	-0.723942	0.166893	-4.33777	1.43936e-05	0.000582348	Vcpkmt
ENSMUST00000156481.7	100.193	-0.568324	0.131051	-4.33665	1.44669e-05	0.000584678	Med28
ENSMUST00000022213.7	279.255	-0.508378	0.117291	-4.33435	1.46192e-05	0.00059019	Thbs4
ENSMUST00000052249.5	255.667	0.653291	0.15096	4.32757	1.50764e-05	0.00060799	Mrps27
ENSMUST00000120613.8	321.047	0.324744	0.0750749	4.32561	1.52113e-05	0.000612765	Kif3a
ENSMUST00000195610.1	53.234	1.63579	0.378223	4.32492	1.52584e-05	0.000614	Gm37890
ENSMUST00000116280.8	1027.35	0.492652	0.113918	4.32463	1.5279e-05	0.000614164	Knop1
ENSMUST00000143608.1	7.41187	4.33749	1.00312	4.32399	1.5323e-05	0.000615268	Wdpcp
ENSMUST00000048966.5	1645.32	-0.292526	0.06771	-4.32028	1.55829e-05	0.00062503	Tcf20
ENSMUST00000149936.1	268.565	0.503467	0.116643	4.31632	1.58655e-05	0.000635678	Hspa8
ENSMUST00000121798.1	48.2529	-0.787238	0.182668	-4.30967	1.63499e-05	0.00065368	Gm14411
ENSMUST00000091291.4	1522.04	-0.480141	0.111405	-4.30989	1.63338e-05	0.00065368	Insr
ENSMUST00000114437.8	463.571	0.324809	0.0753806	4.30892	1.64052e-05	0.000655186	Ppp2r1b
ENSMUST00000147673.1	10.9448	1.66549	0.386623	4.3078	1.64887e-05	0.000657816	Gcfc2
ENSMUST00000162792.7	1534.09	-0.76183	0.17694	-4.30557	1.66553e-05	0.000662837	Agl
ENSMUST00000193207.1	91.6857	0.78962	0.183399	4.30546	1.66636e-05	0.000662837	Gm37983
ENSMUST00000020896.14	427.245	0.552217	0.128261	4.30541	1.6668e-05	0.000662837	Tspan13
ENSMUST00000073192.13	274.333	-0.737606	0.171367	-4.30425	1.67549e-05	0.000665581	Erlec1
ENSMUST00000019268.10	227.597	0.372456	0.0865423	4.30374	1.67938e-05	0.000665737	Scrn1
ENSMUST00000161705.2	56.8318	-0.741966	0.172401	-4.30373	1.67946e-05	0.000665737	Mcoln1
ENSMUST00000001921.2	65.2774	-1.48663	0.345559	-4.30211	1.69179e-05	0.000669912	Cpa3
ENSMUST00000057043.9	122.09	-0.68893	0.160157	-4.30158	1.69585e-05	0.000670094	Tceanc2
ENSMUST00000150321.1	17.073	1.65287	0.384234	4.30173	1.69471e-05	0.000670094	Usp14
ENSMUST00000108337.7	51.1755	-1.93311	0.449497	-4.30061	1.70326e-05	0.000672308	Asph
ENSMUST00000108682.8	411.612	-0.488973	0.113735	-4.29921	1.71407e-05	0.000675858	Gas7
ENSMUST00000173356.7	40.0165	-0.883213	0.20549	-4.29808	1.72285e-05	0.000678601	Greb1l
ENSMUST00000021614.13	1018.7	-0.669362	0.155749	-4.29771	1.72572e-05	0.000679013	Pfkp
ENSMUST00000087714.5	26.0978	-1.71977	0.400249	-4.29674	1.73327e-05	0.000681266	Hist1h4j
ENSMUST00000142064.7	437.838	0.466871	0.108676	4.29598	1.7392e-05	0.000682874	Dpy19l1
ENSMUST00000033873.8	798.452	0.237708	0.0553579	4.29402	1.75468e-05	0.000688228	Erlin2
ENSMUST00000152427.1	79.1284	-0.810673	0.188874	-4.29213	1.7697e-05	0.000692658	Hadh
ENSMUST00000145164.7	52.5371	1.02509	0.238828	4.29219	1.76917e-05	0.000692658	Pisd-ps1
ENSMUST00000159626.7	30.1762	5.91532	1.37851	4.2911	1.77789e-05	0.000695134	Ctnna2
ENSMUST00000139387.7	122.38	0.991014	0.231	4.2901	1.78589e-05	0.000697528	Prdx6
ENSMUST00000140702.2	62.0565	0.722246	0.168418	4.28842	1.79946e-05	0.000702091	Fbxl12
ENSMUST00000150993.1	9.5713	-2.16562	0.505239	-4.28633	1.8165e-05	0.000707997	Snx29
ENSMUST00000107796.7	816.882	-0.303379	0.070793	-4.28544	1.82376e-05	0.000710084	Slc25a51
ENSMUST00000115492.1	96.0133	0.7992	0.186531	4.28454	1.83117e-05	0.000711719	Gpr85
ENSMUST00000151408.7	29.7482	-0.961442	0.224402	-4.28447	1.83178e-05	0.000711719	Rasgrf2
ENSMUST00000110361.7	139.355	1.79011	0.417839	4.28422	1.83379e-05	0.000711755	Ywhaz
ENSMUST00000185510.1	19.528	1.13219	0.264365	4.2827	1.8464e-05	0.000715903	Glce
ENSMUST00000201653.1	306.048	0.605357	0.141416	4.2807	1.86308e-05	0.00072162	Cct6a
ENSMUST00000136075.7	8.08617	2.12771	0.497135	4.27995	1.86938e-05	0.000723305	4930447C04Rik
ENSMUST00000202196.3	8.15597	-2.48993	0.58193	-4.27874	1.87958e-05	0.000726497	2011-09-01
ENSMUST00000001547.7	1204.54	-0.802685	0.187669	-4.27712	1.89323e-05	0.000731016	Col1a1
ENSMUST00000107449.3	27.2349	-0.943691	0.220756	-4.27481	1.913e-05	0.000737881	Bspry
ENSMUST00000170048.1	60.6573	0.684747	0.160237	4.27335	1.92561e-05	0.000741978	A930033H14Rik
ENSMUST00000161904.7	24.0574	-2.42254	0.5673	-4.27029	1.95215e-05	0.000751425	Zfp27
ENSMUST00000190113.1	733.101	0.58409	0.136834	4.26861	1.96699e-05	0.000756355	Gm29562
ENSMUST00000092167.5	1278.94	-0.542939	0.127263	-4.26629	1.98754e-05	0.000763468	Ptprb
ENSMUST00000054654.12	106.845	0.692329	0.162325	4.26509	1.99821e-05	0.000766776	Zfp286
ENSMUST00000026881.10	18.8597	1.16882	0.274164	4.2632	2.01518e-05	0.000772272	Ly96
ENSMUST00000203056.1	12.8074	1.40739	0.330139	4.26304	2.01668e-05	0.000772272	Zfp638
ENSMUST00000103064.9	164.558	-0.604756	0.141922	-4.26118	2.03354e-05	0.000777928	Pitpnc1
ENSMUST00000102815.9	78.4555	0.609829	0.14321	4.25827	2.06012e-05	0.000787289	Ranbp17
ENSMUST00000032491.14	181.718	-0.457277	0.107392	-4.25801	2.06252e-05	0.000787395	Tnfrsf1a
ENSMUST00000110057.2	809.891	0.51077	0.120068	4.25399	2.09996e-05	0.000800866	Flrt3
ENSMUST00000075410.4	233.663	-0.800233	0.188181	-4.25247	2.11428e-05	0.000804197	Btbd3
ENSMUST00000079812.7	1115.83	-0.437146	0.1028	-4.25237	2.11517e-05	0.000804197	Notch2
ENSMUST00000084299.5	299.592	-0.433735	0.10199	-4.25274	2.11175e-05	0.000804197	Akirin2
ENSMUST00000003061.13	757.398	-0.967744	0.22786	-4.2471	2.16555e-05	0.000822512	Bcam
ENSMUST00000154269.6	45.1896	0.891761	0.209999	4.24651	2.17127e-05	0.000823843	Pter
ENSMUST00000173035.1	15.2168	1.63365	0.384782	4.24565	2.17959e-05	0.000826157	Gm20541
ENSMUST00000027797.8	950.119	0.234178	0.0551915	4.243	2.20551e-05	0.000835133	Nvl
ENSMUST00000058902.5	92.7566	0.690064	0.162646	4.24275	2.20799e-05	0.00083522	Eml6
ENSMUST00000188260.6	22.0854	1.72647	0.407261	4.23923	2.24288e-05	0.000847557	A930005H10Rik
ENSMUST00000053926.11	15.3376	1.38361	0.326822	4.23353	2.30056e-05	0.000868472	Pick1
ENSMUST00000189169.6	84.3326	-0.574519	0.135748	-4.23223	2.31384e-05	0.0008726	AV026068
ENSMUST00000167923.7	109.004	0.945065	0.22347	4.22904	2.34689e-05	0.000884171	Gm3696
ENSMUST00000034215.6	88.7591	-1.2066	0.285418	-4.22747	2.36329e-05	0.000889447	Mt1
ENSMUST00000109331.7	1077.17	-0.615321	0.14564	-4.22495	2.38995e-05	0.000898435	Plxnb2
ENSMUST00000174337.7	6.17071	-5.84617	1.38379	-4.22476	2.392e-05	0.000898435	Nrxn1
ENSMUST00000102790.3	149.326	0.646301	0.153083	4.2219	2.42249e-05	0.000908969	Kank4
ENSMUST00000110079.8	84.4141	0.545405	0.129222	4.22068	2.4357e-05	0.000912539	Tasp1
ENSMUST00000176801.1	15.1421	1.46156	0.346296	4.22057	2.4369e-05	0.000912539	Cdh10
ENSMUST00000075884.6	151.913	-1.16357	0.275825	-4.21851	2.45918e-05	0.000919957	Msln
ENSMUST00000068836.4	13.9779	-1.27819	0.303373	-4.21325	2.51717e-05	0.00093976	Gm9967
ENSMUST00000025831.6	89.6065	-0.742233	0.176165	-4.21327	2.51696e-05	0.00093976	Dock8
ENSMUST00000207100.1	11.744	-2.55903	0.607564	-4.21195	2.53174e-05	0.000944252	Insr
ENSMUST00000110028.7	32.1996	-4.19979	0.997807	-4.20902	2.56479e-05	0.00095562	Mgme1
ENSMUST00000089497.6	229.167	-0.405276	0.096306	-4.20822	2.57396e-05	0.000958078	Isy1
ENSMUST00000114950.1	220.856	-1.01053	0.240229	-4.20652	2.59333e-05	0.000964325	Galnt11
ENSMUST00000027861.5	1015.86	-0.71715	0.170511	-4.20588	2.60064e-05	0.000966078	Dpt
ENSMUST00000026050.7	153.623	-0.607592	0.144511	-4.20448	2.61686e-05	0.000971135	Gsto1
ENSMUST00000034717.5	334.473	-0.453153	0.107793	-4.20391	2.62343e-05	0.000972603	Kank2
ENSMUST00000185595.6	5.58553	-5.68774	1.35354	-4.20214	2.64407e-05	0.000978567	Serpina3a
ENSMUST00000113837.8	18.5019	-2.28577	0.543962	-4.20208	2.64478e-05	0.000978567	Adrbk1
ENSMUST00000174662.1	34.7146	-1.06927	0.254497	-4.20151	2.65135e-05	0.000980025	Rps18
ENSMUST00000142573.2	50.8868	-0.840456	0.200217	-4.19772	2.69612e-05	0.000995585	Tanc1
ENSMUST00000144759.7	216.939	-0.928793	0.221363	-4.19578	2.71931e-05	0.00100315	Usp16
ENSMUST00000111093.7	25.8885	-5.05332	1.20551	-4.19187	2.76666e-05	0.0010186	Cldn15
ENSMUST00000046485.3	60.5761	-0.899507	0.214583	-4.19188	2.76653e-05	0.0010186	Efcab11
ENSMUST00000166800.7	27.6707	-0.948142	0.226244	-4.19079	2.77981e-05	0.00102243	Slc6a20b
ENSMUST00000030606.13	200.564	-0.408204	0.0977451	-4.17621	2.96409e-05	0.00108914	Rcan3
ENSMUST00000112779.9	5.94551	4.61539	1.10546	4.17509	2.97872e-05	0.00109343	Gm3149
ENSMUST00000021692.7	233.839	-0.451591	0.108198	-4.17374	2.99639e-05	0.00109883	Yy1
ENSMUST00000039165.14	259.259	0.67757	0.162677	4.16514	3.11166e-05	0.00113998	Golga1
ENSMUST00000180465.7	74.9768	0.852116	0.204665	4.16346	3.13466e-05	0.00114728	4930480K23Rik
ENSMUST00000117061.7	254.418	-0.870111	0.209059	-4.16203	3.15426e-05	0.00115332	2008-09-01
ENSMUST00000198856.1	152.094	0.604289	0.145345	4.15761	3.21594e-05	0.00117242	Gm43549
ENSMUST00000208868.1	111.3	-0.470526	0.113163	-4.15794	3.21132e-05	0.00117242	Clptm1
ENSMUST00000109802.2	146.21	-0.802787	0.193086	-4.15767	3.21516e-05	0.00117242	Adgre5
ENSMUST00000069304.13	1770.86	0.710093	0.170813	4.15713	3.22268e-05	0.00117372	Hnrnph1
ENSMUST00000186485.6	286.829	-5.33113	1.28309	-4.15493	3.25388e-05	0.00118393	Pign
ENSMUST00000203044.2	33.891	-1.27952	0.307976	-4.15462	3.25822e-05	0.00118435	Gm44206
ENSMUST00000113690.7	170.068	0.579224	0.139434	4.15411	3.26559e-05	0.00118587	Tpm1
ENSMUST00000190957.6	31.68	-5.90872	1.42318	-4.15176	3.29929e-05	0.00119694	Dopey1
ENSMUST00000061093.6	16.3767	1.41183	0.340355	4.14812	3.35222e-05	0.00121496	Slc30a10
ENSMUST00000106657.7	522.577	0.480485	0.115905	4.14549	3.39092e-05	0.00122779	Zfyve9
ENSMUST00000107377.9	1055.88	-0.693566	0.167555	-4.13934	3.48314e-05	0.00125995	Tnc
ENSMUST00000060837.9	230.218	-0.639421	0.154513	-4.1383	3.49882e-05	0.0012644	Rab11fip5
ENSMUST00000026470.4	157.367	-0.681474	0.164741	-4.13664	3.52435e-05	0.00127239	Shmt2
ENSMUST00000022499.12	289.251	0.511566	0.123694	4.13573	3.53821e-05	0.00127615	Rnaseh2b
ENSMUST00000199228.1	25.0895	-1.46231	0.353673	-4.13464	3.55504e-05	0.00128098	Gm42971
ENSMUST00000033121.6	336.034	-0.67808	0.164018	-4.13418	3.5623e-05	0.00128236	Nomo1
ENSMUST00000066610.7	192.779	0.498437	0.120604	4.13286	3.58283e-05	0.0012885	Fam212b
ENSMUST00000151240.1	2399.17	-0.521114	0.126104	-4.13243	3.58956e-05	0.00128968	Gm14391
ENSMUST00000012028.13	50.3464	-1.00501	0.243315	-4.13048	3.62005e-05	0.00129938	Gltp
ENSMUST00000028382.12	147.519	0.648861	0.157154	4.12883	3.64613e-05	0.00130748	Nup35
ENSMUST00000108623.7	106.498	0.535677	0.129821	4.12627	3.68691e-05	0.00132083	Rps9
ENSMUST00000191127.6	16.8411	1.24875	0.302735	4.12491	3.70873e-05	0.00132737	Ly6e
ENSMUST00000128026.1	138.21	0.410162	0.0995031	4.12211	3.75424e-05	0.00134113	2500004C02Rik
ENSMUST00000032307.11	81.5082	0.830207	0.201404	4.1221	3.7544e-05	0.00134113	Magohb
ENSMUST00000088552.6	10479.6	0.68662	0.166697	4.11897	3.80574e-05	0.00135817	Myl9
ENSMUST00000201314.1	76.0189	0.988173	0.240147	4.11486	3.87409e-05	0.00138124	Pisd
ENSMUST00000020531.8	1483.62	0.925946	0.225315	4.10956	3.96418e-05	0.00141201	Hba-x
ENSMUST00000107717.7	831.405	-0.361244	0.0879231	-4.10863	3.98011e-05	0.00141633	Zfp652
ENSMUST00000025786.7	150.089	-0.547299	0.133366	-4.10375	4.06509e-05	0.00144518	Pacs1
ENSMUST00000029071.8	90.3971	-0.577497	0.140737	-4.10336	4.07191e-05	0.00144623	Car13
ENSMUST00000146013.7	142.733	1.02426	0.249651	4.10276	4.08253e-05	0.00144862	Gdi1
ENSMUST00000152782.7	1097.79	-0.650527	0.158719	-4.09861	4.15644e-05	0.00147344	Heg1
ENSMUST00000041920.4	11.7305	4.48267	1.09378	4.09834	4.16122e-05	0.00147373	Cd1d2
ENSMUST00000180743.1	36.2715	0.869412	0.212209	4.09696	4.18607e-05	0.00148112	Gm26561
ENSMUST00000100528.4	557.174	-0.310431	0.0757937	-4.09573	4.20835e-05	0.00148759	Ube2z
ENSMUST00000163525.7	10.3993	5.58629	1.36436	4.09444	4.23197e-05	0.00149452	Gm3239
ENSMUST00000035852.13	58.9447	1.04176	0.254466	4.09392	4.24148e-05	0.00149646	Zcwpw1
ENSMUST00000089948.5	107.71	0.698641	0.170771	4.0911	4.2934e-05	0.00151334	Slc44a5
ENSMUST00000162466.7	12.6712	2.63363	0.643966	4.0897	4.31924e-05	0.00152101	Nae1
ENSMUST00000022340.3	1216.26	-0.349206	0.0853972	-4.08919	4.32875e-05	0.00152292	Nid2
ENSMUST00000035167.14	104.049	0.949125	0.23226	4.08647	4.37986e-05	0.00153944	Nphp3
ENSMUST00000107348.1	760.49	-0.580641	0.14223	-4.0824	4.45733e-05	0.0015652	Alpk3
ENSMUST00000159935.1	42.4356	-0.927211	0.227173	-4.08152	4.47431e-05	0.00156968	Ptger1
ENSMUST00000056760.3	132.939	0.783264	0.192021	4.07906	4.52176e-05	0.00158483	Flrt3
ENSMUST00000022322.15	727.228	-0.363665	0.0892363	-4.0753	4.59543e-05	0.00160913	Glud1
ENSMUST00000041956.13	1387.6	-0.479578	0.117749	-4.07289	4.64337e-05	0.0016244	Spag9
ENSMUST00000022121.12	187.992	-0.575569	0.141359	-4.07169	4.66728e-05	0.00163123	Zcchc9
ENSMUST00000028633.12	7098.16	-0.300813	0.0739093	-4.07002	4.70084e-05	0.00164128	Fbn1
ENSMUST00000094578.10	1432.59	-0.288265	0.0708298	-4.06982	4.70485e-05	0.00164128	Sec31a
ENSMUST00000066295.3	156.677	-0.635098	0.156193	-4.06611	4.78042e-05	0.00166607	Kcnk3
ENSMUST00000111432.9	295.128	-0.571743	0.140637	-4.0654	4.79511e-05	0.00166963	Creg1
ENSMUST00000032906.10	59.7936	1.3156	0.323681	4.06449	4.81383e-05	0.00167458	Calca
ENSMUST00000042732.5	389.912	-0.295747	0.0728178	-4.06147	4.87656e-05	0.00169482	Fbxo45
ENSMUST00000039655.2	729.684	-0.517823	0.127574	-4.059	4.92829e-05	0.0017112	Tulp4
ENSMUST00000007012.4	1410.82	-0.418166	0.103046	-4.05807	4.94797e-05	0.00171643	Sod2
ENSMUST00000190211.1	20.0606	2.94408	0.726662	4.05152	5.08868e-05	0.0017636	Glrx2
ENSMUST00000187836.6	74.7478	1.30804	0.322885	4.05109	5.09804e-05	0.0017652	Dnpep
ENSMUST00000022725.2	32.1966	-2.41916	0.597281	-4.05028	5.11555e-05	0.00176962	Dct
ENSMUST00000036572.3	137.68	-0.921564	0.227601	-4.04903	5.14311e-05	0.0017775	Tmem51
ENSMUST00000023580.6	754.784	-0.489882	0.121003	-4.0485	5.15462e-05	0.00177983	Usp25
ENSMUST00000189385.6	9.90483	4.8511	1.1992	4.0453	5.22573e-05	0.00180271	Prex2
ENSMUST00000169079.7	310.094	0.574217	0.141979	4.04437	5.24635e-05	0.00180814	Lrrcc1
ENSMUST00000075418.14	137.532	-0.461059	0.114155	-4.03887	5.37089e-05	0.00184935	Stard5
ENSMUST00000111855.4	356.033	-0.682242	0.169018	-4.03651	5.42521e-05	0.00186633	Wbp1l
ENSMUST00000163957.1	15.2576	-4.25189	1.05342	-4.03627	5.43071e-05	0.0018665	Parg
ENSMUST00000134727.7	153.071	0.545518	0.135169	4.03583	5.44107e-05	0.00186833	Cdc26
ENSMUST00000035230.6	175.084	0.571971	0.141813	4.03327	5.50059e-05	0.00188703	Amt
ENSMUST00000025875.4	31.6971	1.87771	0.465748	4.0316	5.53986e-05	0.00189875	Slc1a1
ENSMUST00000060435.6	285.918	-0.487296	0.120895	-4.03073	5.56039e-05	0.00190404	Sepn1
ENSMUST00000010020.11	16.5201	1.29583	0.321666	4.02849	5.61359e-05	0.00192049	Cox4i2
ENSMUST00000105574.8	139.019	-10.37	2.57565	-4.02618	5.669e-05	0.00193766	Agrn
ENSMUST00000143828.1	17.0846	1.30674	0.324706	4.02437	5.71275e-05	0.00195083	Trmt61b
ENSMUST00000026703.5	855.072	0.276568	0.0687513	4.02273	5.75276e-05	0.00196269	Bach1
ENSMUST00000197856.1	49.59	-0.857524	0.213264	-4.02094	5.79655e-05	0.00197582	C230031I18Rik
ENSMUST00000055535.8	104.824	0.462512	0.115038	4.02052	5.80693e-05	0.00197754	Prtg
ENSMUST00000124364.1	12.1779	-2.01164	0.500592	-4.01852	5.85656e-05	0.00199262	Zbtb8b
ENSMUST00000020375.6	243.976	-0.549515	0.136758	-4.01815	5.86557e-05	0.00199387	Rab3ip
ENSMUST00000154232.8	206.966	-0.805872	0.200612	-4.01706	5.89278e-05	0.00200129	Brd2
ENSMUST00000118816.5	29.5118	1.57516	0.392342	4.01477	5.95038e-05	0.00201717	Cox18
ENSMUST00000133667.1	69.8299	0.573846	0.142934	4.01477	5.95026e-05	0.00201717	Hmgb1
ENSMUST00000173405.7	11.9918	-4.86833	1.21383	-4.01072	6.05329e-05	0.00205019	Syncrip
ENSMUST00000078139.12	524.062	0.679064	0.169375	4.00925	6.09132e-05	0.00206119	Asph
ENSMUST00000102872.10	159.283	-0.546308	0.136288	-4.00848	6.1111e-05	0.00206583	Rapgef1
ENSMUST00000014694.10	446.87	0.351385	0.0876648	4.00828	6.11613e-05	0.00206583	Rbsn
ENSMUST00000097275.8	189.205	-0.534782	0.13349	-4.00616	6.17141e-05	0.00208261	Prkce
ENSMUST00000130392.7	31.8584	0.806934	0.201616	4.00234	6.27193e-05	0.00211462	Eldr
ENSMUST00000011398.12	124.773	0.647045	0.161802	3.99899	6.36128e-05	0.0021428	Thg1l
ENSMUST00000016897.10	102.806	0.657139	0.164392	3.99738	6.40462e-05	0.00215545	Ttll1
ENSMUST00000179526.1	11.3472	1.4745	0.369153	3.99428	6.48917e-05	0.00218193	Tmem215
ENSMUST00000040025.13	1298.67	-0.424008	0.106185	-3.99309	6.52177e-05	0.00219091	Tln2
ENSMUST00000003461.14	1446.94	-0.63678	0.159512	-3.99205	6.55046e-05	0.00219857	Ogdh
ENSMUST00000112871.7	174.845	-0.672758	0.168549	-3.99148	6.56621e-05	0.00219989	Cxcl12
ENSMUST00000201099.1	20.5237	1.07185	0.268521	3.99168	6.56061e-05	0.00219989	Ythdc2
ENSMUST00000016088.8	107.836	-0.786773	0.197188	-3.98996	6.60849e-05	0.00221206	Gatsl2
ENSMUST00000137342.1	19.1762	1.04103	0.261152	3.98628	6.7118e-05	0.00224463	Zfp61
ENSMUST00000027521.14	118.982	-1.03419	0.259487	-3.98553	6.73304e-05	0.00224971	Agap1
ENSMUST00000106597.9	20.1335	5.83258	1.46354	3.98526	6.74055e-05	0.0022502	Elavl4
ENSMUST00000044604.14	1148.47	0.350752	0.0880349	3.98424	6.76969e-05	0.0022579	Crybg3
ENSMUST00000154423.1	27.8348	0.858041	0.215454	3.98248	6.81993e-05	0.00227262	Vcp
ENSMUST00000030121.12	816.81	-0.252338	0.0634043	-3.97982	6.89671e-05	0.00229615	B4galt1
ENSMUST00000026011.6	101.306	0.44895	0.112825	3.97917	6.91549e-05	0.00230034	Sfxn2
ENSMUST00000181739.1	12.3184	-1.47033	0.369825	-3.97573	7.01637e-05	0.00233182	4930556M19Rik
ENSMUST00000059647.11	733.929	0.689917	0.173576	3.97472	7.04616e-05	0.00233963	Rbm12
ENSMUST00000109249.8	217.037	-0.567075	0.142722	-3.97329	7.0888e-05	0.00235169	Sulf2
ENSMUST00000046587.6	137.423	0.580735	0.146316	3.96904	7.21619e-05	0.00239182	Scamp5
ENSMUST00000151609.1	13.7156	-2.0095	0.506469	-3.96768	7.25771e-05	0.00240344	1700010I14Rik
ENSMUST00000198030.1	274.259	-0.752807	0.189832	-3.96566	7.31941e-05	0.00242172	Tm4sf1
ENSMUST00000093209.3	3719.43	-1.18164	0.298082	-3.96415	7.36588e-05	0.00243493	Hba-a1
ENSMUST00000002099.9	69.5956	-0.662165	0.167052	-3.96383	7.37558e-05	0.00243597	Ift46
ENSMUST00000076052.7	309.804	0.408474	0.103111	3.96151	7.44761e-05	0.0024554	Prcp
ENSMUST00000103079.3	852	-0.284487	0.0718119	-3.96156	7.44619e-05	0.0024554	Cttn
ENSMUST00000098441.9	822.445	0.562067	0.141906	3.96083	7.46902e-05	0.00246028	Col6a6
ENSMUST00000150239.1	17.6343	1.26346	0.319262	3.95743	7.57597e-05	0.00249118	Ttc39aos1
ENSMUST00000207061.1	114.298	0.499213	0.126153	3.95721	7.5829e-05	0.00249118	NA
ENSMUST00000021239.6	897.199	-0.283369	0.0716063	-3.95732	7.57954e-05	0.00249118	Lrrc59
ENSMUST00000197913.1	65.9239	-1.0027	0.253463	-3.956	7.62154e-05	0.00250104	Gm42973
ENSMUST00000115078.7	25.6897	1.47357	0.37253	3.95557	7.63536e-05	0.00250104	Rpl35a
ENSMUST00000180789.1	164.885	0.635679	0.160711	3.95543	7.63978e-05	0.00250104	1010001N08Rik
ENSMUST00000025833.6	334.794	0.690995	0.174684	3.95569	7.63149e-05	0.00250104	Papss2
ENSMUST00000169273.1	708.024	-0.360565	0.0911783	-3.9545	7.66949e-05	0.00250856	Ndst1
ENSMUST00000015449.5	410.856	-0.503011	0.127218	-3.95392	7.68812e-05	0.00251244	Sash1
ENSMUST00000044385.13	82.9024	0.582749	0.147428	3.95278	7.72473e-05	0.00252219	Sgtb
ENSMUST00000180184.1	145.182	5.82249	1.4741	3.94986	7.81956e-05	0.00255092	Gm2974
ENSMUST00000101118.3	530.011	-0.356227	0.0902027	-3.94918	7.8418e-05	0.00255593	Rybp
ENSMUST00000170546.7	23.3548	1.11699	0.282965	3.94744	7.89901e-05	0.00257233	Gm8159
ENSMUST00000162406.1	12.5261	-4.71839	1.19545	-3.94697	7.91449e-05	0.00257511	Tmem163
ENSMUST00000001963.13	32.3379	-1.95175	0.49485	-3.94412	8.00938e-05	0.00260371	Ace
ENSMUST00000172431.7	46.7342	1.05838	0.26849	3.94197	8.0816e-05	0.0026249	Gm3512
ENSMUST00000170518.1	112.341	-0.457103	0.115985	-3.94107	8.11204e-05	0.00263249	Gm17296
ENSMUST00000098852.2	1360.79	0.666813	0.169259	3.9396	8.16182e-05	0.00264634	Mcam
ENSMUST00000111322.1	9.35538	-1.57432	0.399678	-3.93898	8.18287e-05	0.00265085	Harbi1
ENSMUST00000154785.1	18.8595	1.86749	0.47462	3.9347	8.32994e-05	0.00269615	Mrpl21
ENSMUST00000106007.9	14.0656	-3.98187	1.01265	-3.93213	8.41951e-05	0.00272277	Slc25a22
ENSMUST00000055704.11	665.55	-0.471938	0.120048	-3.93124	8.4509e-05	0.00273055	Gnai2
ENSMUST00000082094.4	961.625	0.527822	0.134284	3.93063	8.47232e-05	0.0027351	Ptcd3
ENSMUST00000151338.7	43.1811	1.30285	0.331533	3.92978	8.50249e-05	0.00274246	Clk1
ENSMUST00000073527.12	293.593	0.79006	0.201108	3.92854	8.54645e-05	0.00275187	Thsd7b
ENSMUST00000155271.1	1058.37	0.348051	0.0885917	3.92871	8.54012e-05	0.00275187	Myl4
ENSMUST00000161890.1	211.193	-0.61785	0.157285	-3.92821	8.55798e-05	0.0027532	Airn
ENSMUST00000081074.4	16.851	-1.59348	0.405877	-3.92603	8.63603e-05	0.00277591	4932411N23Rik
ENSMUST00000202522.1	19.8718	-1.32813	0.338655	-3.92179	8.78936e-05	0.00282276	Gm43281
ENSMUST00000140485.7	730.718	-0.821483	0.209555	-3.92013	8.85019e-05	0.00283984	Raph1
ENSMUST00000062058.4	654.936	-0.233732	0.0596494	-3.91844	8.91238e-05	0.00285734	Lix1l
ENSMUST00000029046.8	1374.07	-0.439389	0.112172	-3.91711	8.96166e-05	0.00287066	Fabp5
ENSMUST00000106464.2	15.5232	-4.88112	1.24686	-3.91474	9.05018e-05	0.00289652	Ccdc163
ENSMUST00000191275.6	71.0414	-1.62412	0.414936	-3.91415	9.07221e-05	0.00290108	Erbb2ip
ENSMUST00000040907.6	341.834	-0.445541	0.113848	-3.91348	9.09745e-05	0.00290666	Decr2
ENSMUST00000102841.7	2484.08	-0.458287	0.117178	-3.91104	9.19002e-05	0.00293371	Rtn4
ENSMUST00000000642.10	826.877	-0.503638	0.128788	-3.9106	9.20687e-05	0.00293657	Hk2
ENSMUST00000079703.9	247.719	0.28743	0.0735247	3.90929	9.25659e-05	0.0029499	Nsmce2
ENSMUST00000199888.4	73.8052	-1.63227	0.41772	-3.90757	9.32296e-05	0.00296851	Zgrf1
ENSMUST00000173927.7	19.3447	5.43149	1.39007	3.90734	9.33195e-05	0.00296883	Gnpda2
ENSMUST00000049460.10	420.385	-0.639274	0.163648	-3.90641	9.36782e-05	0.0029777	Grn
ENSMUST00000095078.2	307.667	-0.501871	0.1285	-3.90561	9.39881e-05	0.00298501	Lrrc8a
ENSMUST00000196449.4	84.9932	0.587848	0.150555	3.90454	9.44042e-05	0.00299566	Vcam1
ENSMUST00000154529.1	10.8442	4.80399	1.23128	3.90161	9.55549e-05	0.0030296	Ubap1
ENSMUST00000027856.12	569.115	-0.394848	0.101219	-3.90094	9.58218e-05	0.00303547	Dcaf6
ENSMUST00000173445.1	11.7754	-1.71442	0.43962	-3.89978	9.62807e-05	0.00304742	Vps52
ENSMUST00000035269.14	1143.31	-0.615508	0.157864	-3.89897	9.66015e-05	0.00305497	Pygm
ENSMUST00000021685.6	14.5343	-1.99815	0.512764	-3.89681	9.74667e-05	0.00307971	Hhipl1
ENSMUST00000117150.7	264.535	-0.784091	0.201249	-3.89612	9.77442e-05	0.00308587	Phtf1
ENSMUST00000170481.8	401.093	-0.769441	0.197546	-3.89499	9.82024e-05	0.0030977	Mecp2
ENSMUST00000178328.7	3665.72	0.348629	0.0896342	3.88947	0.000100464	0.00316636	Gyg
ENSMUST00000092915.11	546.178	-0.851683	0.219012	-3.88875	0.000100764	0.00317312	Cluh
ENSMUST00000100275.9	78.4411	-1.27384	0.327621	-3.88816	0.000101009	0.00317815	Zfp788
ENSMUST00000208253.1	110.266	-0.497838	0.128103	-3.88622	0.000101816	0.00320083	Med25
ENSMUST00000092498.11	852.262	0.371421	0.0955953	3.88534	0.000102186	0.00320974	Sgpl1
ENSMUST00000185561.1	13.4899	1.60958	0.414686	3.88144	0.00010384	0.00325897	Pxylp1
ENSMUST00000133447.1	71.2111	-7.54233	1.94361	-3.88057	0.000104211	0.00326786	Klhl4
ENSMUST00000168651.5	580.909	0.447879	0.115425	3.88026	0.000104345	0.0032693	Sbno1
ENSMUST00000075774.3	911.422	0.557887	0.143876	3.87756	0.00010551	0.00330301	Tubb2b
ENSMUST00000064204.13	2689.04	-0.661631	0.170665	-3.87678	0.000105849	0.00331086	Actn2
ENSMUST00000196083.1	24.941	0.973784	0.251261	3.87559	0.000106369	0.00331874	Gm43143
ENSMUST00000106647.7	271.438	-0.503745	0.129978	-3.87562	0.000106355	0.00331874	Mical2
ENSMUST00000149027.7	46.8832	0.801329	0.206755	3.87574	0.000106302	0.00331874	Dynlt1c
ENSMUST00000041124.12	1548.61	-0.265404	0.0685025	-3.87437	0.000106899	0.0033325	Zfp704
ENSMUST00000035766.12	49.3429	-2.0799	0.536929	-3.8737	0.000107195	0.00333893	Wdr44
ENSMUST00000074783.11	2443.08	-0.553096	0.142863	-3.87152	0.00010816	0.00336617	Hmcn1
ENSMUST00000156546.1	32.0875	-6.70605	1.73294	-3.86975	0.000108945	0.00338776	Cerk
ENSMUST00000075994.10	778.571	-0.3734	0.0965718	-3.86655	0.000110387	0.00342975	Pdzrn3
ENSMUST00000142459.1	27.9822	-1.44951	0.375196	-3.86333	0.00011185	0.00347229	Frzb
ENSMUST00000057557.13	565.475	-0.306711	0.0793983	-3.86294	0.00011203	0.00347498	Mcmbp
ENSMUST00000063262.10	262.188	0.594542	0.154025	3.86003	0.000113375	0.00351378	Zfp68
ENSMUST00000210186.1	11.4077	-2.72709	0.706611	-3.85939	0.000113671	0.00351709	Igsf11
ENSMUST00000209958.1	11.4077	-2.72709	0.706611	-3.85939	0.000113671	0.00351709	Igsf11
ENSMUST00000202980.1	49.923	1.39331	0.361111	3.85841	0.000114125	0.00352528	Dynll1
ENSMUST00000102993.9	1022.73	-0.281449	0.0729437	-3.85844	0.000114115	0.00352528	Ube2h
ENSMUST00000206836.1	24.5455	1.00115	0.259582	3.85679	0.000114888	0.0035459	Gm17825
ENSMUST00000029259.9	105.278	-1.14227	0.296421	-3.85353	0.000116429	0.00359049	Mccc1
ENSMUST00000034728.7	236.416	-0.691783	0.17956	-3.85266	0.000116839	0.00360016	Dock6
ENSMUST00000159078.1	839.543	0.372554	0.0967133	3.85215	0.000117087	0.00360181	Sphkap
ENSMUST00000156846.7	197.702	0.410743	0.106622	3.85233	0.000117	0.00360181	Trub2
ENSMUST00000130916.7	150.045	-0.504696	0.131059	-3.85091	0.000117678	0.00361701	Becn1
ENSMUST00000022716.2	302.237	0.2999	0.077913	3.84916	0.000118521	0.00363994	Rnf219
ENSMUST00000097936.8	2476.75	4.50779	1.17127	3.84864	0.000118777	0.0036448	Igf2
ENSMUST00000005671.9	1108.96	-0.442013	0.114869	-3.84799	0.000119093	0.00365148	Igf1r
ENSMUST00000025490.8	188.951	-0.625373	0.162529	-3.84777	0.000119199	0.00365171	Prrc1
ENSMUST00000041055.7	659.872	-0.283629	0.073726	-3.84706	0.000119543	0.00365923	Atg2b
ENSMUST00000123262.7	188.06	-0.631943	0.164482	-3.84202	0.000122024	0.00372903	Snapc3
ENSMUST00000146202.1	38.0592	0.807519	0.210173	3.84216	0.000121955	0.00372903	Zfp398
ENSMUST00000007005.13	426.355	-0.48995	0.12762	-3.83912	0.000123478	0.00377038	Acat2
ENSMUST00000177817.1	10.591	2.17821	0.567873	3.83573	0.000125191	0.00381954	Gm21738
ENSMUST00000046122.10	641.262	-0.490421	0.127887	-3.83481	0.000125661	0.00382822	Lap3
ENSMUST00000071739.11	174.468	-0.487691	0.127176	-3.83477	0.000125681	0.00382822	Gsk3a
ENSMUST00000125559.7	17.7148	1.22513	0.319508	3.83442	0.000125863	0.00383064	Tmem44
ENSMUST00000039551.8	441.039	0.445046	0.116151	3.83163	0.000127297	0.0038711	Polr3k
ENSMUST00000131309.1	444.761	0.303999	0.0794173	3.82787	0.000129258	0.00392755	Fzd3
ENSMUST00000138474.1	26.0168	0.845528	0.220943	3.82691	0.000129762	0.00393963	Adamts1
ENSMUST00000168844.8	111.137	2.21676	0.579364	3.8262	0.000130138	0.00394783	Dis3l
ENSMUST00000100225.8	170.604	-11.3338	2.96267	-3.82552	0.000130495	0.00395544	Sptan1
ENSMUST00000005365.14	405.711	0.434355	0.113586	3.82401	0.000131297	0.00397652	Spc25
ENSMUST00000211765.1	85.5734	-0.64372	0.168383	-3.82294	0.000131869	0.0039906	Nucb1
ENSMUST00000129836.1	13.1057	-1.35595	0.354753	-3.82225	0.00013224	0.00399531	Mtfr1l
ENSMUST00000138126.7	19.3227	-5.50053	1.43907	-3.82228	0.000132224	0.00399531	Sfi1
ENSMUST00000108775.1	656.525	-0.511612	0.134038	-3.81692	0.000135126	0.00407922	Sipa1l2
ENSMUST00000021338.8	143.891	-0.672152	0.1763	-3.81254	0.000137546	0.00414891	Ap4s1
ENSMUST00000150320.2	116.537	0.394844	0.103599	3.81129	0.000138245	0.00416659	Ankrd16
ENSMUST00000027741.11	1024.89	-0.3198	0.0839563	-3.80913	0.000139458	0.00419975	Xpr1
ENSMUST00000075245.6	86.7488	-1.7756	0.466177	-3.80885	0.000139613	0.00420104	Unc13c
ENSMUST00000029662.11	135.298	4.73481	1.24327	3.80836	0.000139889	0.00420594	Alpk1
ENSMUST00000147307.1	22.1029	-0.969151	0.254661	-3.80565	0.000141434	0.00424895	Eno2
ENSMUST00000045557.9	95.9749	-0.59712	0.156916	-3.80534	0.000141612	0.00425087	Slc7a5
ENSMUST00000054815.13	181.976	-0.382133	0.100451	-3.80416	0.000142286	0.00426766	Ppp1r13b
ENSMUST00000161796.8	155.424	-0.620691	0.16317	-3.80395	0.000142408	0.00426789	Hmgn3
ENSMUST00000166122.1	11.9261	1.23485	0.324747	3.80251	0.000143238	0.00428929	Rars
ENSMUST00000100337.9	887.834	-0.405481	0.106666	-3.80139	0.000143884	0.00430518	Lmo7
ENSMUST00000119429.7	772.272	-0.782514	0.205865	-3.80111	0.000144051	0.00430673	Myl1
ENSMUST00000129306.3	19.757	-6.03746	1.58871	-3.80022	0.000144565	0.00431863	Fscn1
ENSMUST00000038257.6	29.1832	0.960165	0.252909	3.79649	0.000146762	0.00437721	Gstt2
ENSMUST00000103148.7	18.4555	-2.08113	0.54817	-3.79651	0.000146748	0.00437721	Pcgf2
ENSMUST00000123858.7	40.6671	-0.693069	0.182699	-3.7935	0.000148541	0.00442573	Metap1d
ENSMUST00000207309.1	15.8646	2.91978	0.769708	3.79335	0.000148626	0.00442573	l7Rn6
ENSMUST00000114034.8	132.815	0.535596	0.14123	3.79237	0.000149214	0.0044348	Lrrc49
ENSMUST00000025181.16	50.6178	-0.829096	0.21861	-3.79259	0.000149084	0.0044348	H2-K1
ENSMUST00000166010.1	99.7005	0.431944	0.113902	3.79225	0.000149288	0.0044348	Tsr2
ENSMUST00000185269.6	790.775	-0.779537	0.205647	-3.79065	0.000150253	0.00445635	Dst
ENSMUST00000027655.7	134.453	0.600263	0.158347	3.79081	0.000150156	0.00445635	Ddx59
ENSMUST00000102694.3	1550.64	-0.386123	0.101869	-3.79038	0.00015042	0.00445774	Ptgfrn
ENSMUST00000035931.12	1202.17	0.413469	0.109168	3.78744	0.000152208	0.00450715	Pcdh18
ENSMUST00000043315.13	24.2857	-1.74663	0.461325	-3.78612	0.000153017	0.0045275	Serpina3g
ENSMUST00000140231.2	89.6883	0.772776	0.204132	3.78567	0.000153293	0.00453206	Myoz2
ENSMUST00000021284.3	241.181	-0.948396	0.250613	-3.78431	0.000154135	0.00455334	Ntn1
ENSMUST00000050630.13	17.3469	-4.11073	1.08636	-3.78393	0.000154371	0.00455668	Supt3
ENSMUST00000163846.1	42.3116	-0.674389	0.178242	-3.78356	0.000154603	0.00455994	Nisch
ENSMUST00000076807.6	33.5068	-3.49183	0.923272	-3.78202	0.000155562	0.00458457	Pcdhgc3
ENSMUST00000084750.7	109.986	-0.644316	0.170387	-3.78148	0.0001559	0.00459091	Ankrd6
ENSMUST00000166890.7	20.2927	-5.359	1.4176	-3.78032	0.000156626	0.00460864	Pde1c
ENSMUST00000070326.13	327.099	0.467639	0.123761	3.77857	0.00015773	0.00463747	Ttk
ENSMUST00000183966.7	140.907	0.514521	0.136194	3.77786	0.000158183	0.00464712	1500004A13Rik
ENSMUST00000054384.5	331.714	-0.270636	0.0716536	-3.77701	0.000158722	0.00465926	Trim56
ENSMUST00000138410.7	16.1278	5.147	1.36288	3.77655	0.000159013	0.00466412	Grip1
ENSMUST00000211190.1	541.461	0.700751	0.18558	3.77602	0.000159357	0.00467053	Pdlim3
ENSMUST00000105256.8	766.758	-0.471464	0.124941	-3.7735	0.000160973	0.00471418	Ctdsp2
ENSMUST00000144053.1	52.3183	-0.873816	0.231625	-3.77255	0.000161587	0.00472845	Pfkp
ENSMUST00000129610.1	17.5785	1.28531	0.340934	3.76997	0.00016327	0.00477396	Pygb
ENSMUST00000206750.1	33.3024	-0.853427	0.226456	-3.76861	0.000164157	0.00479612	Dedd2
ENSMUST00000181028.1	22.1878	1.04093	0.276421	3.76574	0.000166059	0.00484787	Gm26628
ENSMUST00000136559.7	30.1585	-0.917445	0.243655	-3.76534	0.00016632	0.00485169	Akr1b3
ENSMUST00000133388.1	13.3453	4.20932	1.11888	3.76209	0.000168496	0.00491132	Stag1
ENSMUST00000154531.7	37.427	0.737642	0.196125	3.76107	0.000169185	0.00492754	Lrrc14
ENSMUST00000026274.13	306.941	-0.502544	0.13366	-3.75988	0.000169995	0.00494726	Lztfl1
ENSMUST00000029367.5	1116.72	0.416972	0.110931	3.75883	0.000170707	0.00496412	Bche
ENSMUST00000047521.6	84.6727	-0.517517	0.137715	-3.75787	0.000171365	0.00497935	Cercam
ENSMUST00000001562.8	102.044	-0.759478	0.202485	-3.75079	0.000176277	0.00511807	Tulp3
ENSMUST00000196753.4	83.3209	0.504965	0.134673	3.74955	0.00017715	0.00513941	Anapc5
ENSMUST00000057846.14	44.7324	-3.43315	0.916442	-3.74617	0.000179553	0.00520508	Nckap5
ENSMUST00000128532.1	43.6389	0.670764	0.179066	3.74591	0.000179741	0.00520648	Hjurp
ENSMUST00000154088.1	57.852	1.01528	0.271212	3.7435	0.000181475	0.00525263	Usp14
ENSMUST00000195744.1	118.096	0.921402	0.246303	3.74093	0.000183342	0.00530252	Trim55
ENSMUST00000123074.7	3946.31	0.96198	0.257264	3.73927	0.000184557	0.00533354	Myl4
ENSMUST00000018522.12	57.3101	-0.876434	0.234563	-3.73645	0.000186635	0.0053894	Cuedc1
ENSMUST00000020057.14	153.067	0.671115	0.179683	3.73498	0.000187727	0.00541672	Lin7a
ENSMUST00000095471.4	9.78985	6.39995	1.71378	3.73441	0.000188156	0.0054249	Rps2-ps6
ENSMUST00000076894.10	513.106	0.502057	0.134498	3.73281	0.000189356	0.00545527	Rfwd2
ENSMUST00000032071.12	909.841	-0.342496	0.0917792	-3.73174	0.00019016	0.00547419	Dusp11
ENSMUST00000204765.2	21.5805	-5.64561	1.51336	-3.73051	0.000191095	0.00549687	Tpra1
ENSMUST00000047429.8	102.65	0.536888	0.143941	3.72992	0.00019154	0.0055054	Mrps6
ENSMUST00000025684.3	270.446	-0.590418	0.158417	-3.72698	0.000193789	0.00556576	Ehd1
ENSMUST00000099047.3	27.5311	1.49301	0.400652	3.72645	0.000194194	0.00557309	Gm10719
ENSMUST00000042700.10	10.103	2.03331	0.54583	3.72517	0.000195182	0.00559712	Gstp2
ENSMUST00000164665.1	95.6696	0.934907	0.251047	3.72403	0.000196071	0.00561827	Tnks2
ENSMUST00000205440.1	76.2822	-0.75142	0.201824	-3.72315	0.000196756	0.00563357	Sh2b1
ENSMUST00000185233.6	169.414	0.624853	0.1679	3.72157	0.000197986	0.00566443	Pfkfb2
ENSMUST00000062528.8	55.7348	1.1018	0.296089	3.72118	0.000198292	0.00566884	Cdh20
ENSMUST00000124877.2	105.277	0.726543	0.195258	3.72093	0.000198487	0.00567005	NA
ENSMUST00000027916.12	209.59	0.334569	0.0899587	3.71914	0.000199903	0.00570291	Bpnt1
ENSMUST00000039788.10	169.014	-0.743915	0.200026	-3.71909	0.000199943	0.00570291	Cd276
ENSMUST00000024005.7	33.5327	-1.32293	0.355981	-3.71629	0.000202171	0.00576202	Scg5
ENSMUST00000076541.12	339.781	0.297754	0.0801422	3.71533	0.00020294	0.00577246	Cdk5rap2
ENSMUST00000030207.14	1257.73	0.315714	0.0849805	3.71513	0.0002031	0.00577246	Psip1
ENSMUST00000030773.11	175.914	0.416007	0.111974	3.71521	0.000203032	0.00577246	Xrcc2
ENSMUST00000134984.1	83.3068	0.461782	0.1243	3.71506	0.000203157	0.00577246	Naa30
ENSMUST00000117085.1	201.292	-0.571305	0.153812	-3.71431	0.000203756	0.00578507	Abhd17c
ENSMUST00000192286.1	117.641	-0.416899	0.112297	-3.71247	0.000205246	0.00582291	Mrpl15
ENSMUST00000070181.6	251.021	-0.525245	0.141583	-3.70979	0.000207429	0.00587588	Itpkb
ENSMUST00000004428.13	1958.28	0.24576	0.0662434	3.70995	0.000207298	0.00587588	Clcn5
ENSMUST00000166847.7	14.3915	-2.16549	0.583875	-3.70882	0.00020823	0.0058941	Rsph10b
ENSMUST00000196253.1	110.258	0.644361	0.173797	3.70755	0.000209272	0.00591017	Gm43379
ENSMUST00000111738.7	111.759	0.469791	0.126707	3.7077	0.000209151	0.00591017	Tctn1
ENSMUST00000020617.2	114.887	-0.652388	0.175962	-3.70755	0.000209274	0.00591017	Flt4
ENSMUST00000050139.4	12.0058	-1.50967	0.407225	-3.70721	0.000209559	0.00591372	Ackr4
ENSMUST00000118566.7	195.269	0.726442	0.196089	3.70465	0.000211679	0.00596903	Tpm3
ENSMUST00000197503.1	243.085	0.324057	0.0874929	3.7038	0.000212391	0.00598458	Zan
ENSMUST00000113086.8	13.3348	-4.8185	1.30126	-3.70294	0.000213115	0.00600042	Rabepk
ENSMUST00000207521.1	22.1922	-1.00639	0.271882	-3.70156	0.000214277	0.00602859	Irf3
ENSMUST00000145772.7	144.021	-0.378414	0.102244	-3.7011	0.00021467	0.00603509	Wsb1
ENSMUST00000160297.7	14.0132	-3.66093	0.989481	-3.69985	0.000215728	0.00606024	Tbc1d4
ENSMUST00000032066.12	45.4369	-0.844016	0.228276	-3.69735	0.000217862	0.00611195	Tgfa
ENSMUST00000057561.7	510.279	-0.475485	0.128603	-3.69731	0.000217897	0.00611195	Wwc2
ENSMUST00000130516.7	116.972	0.418108	0.113122	3.69607	0.000218961	0.00613718	Rbm39
ENSMUST00000106103.7	43.2555	-1.45824	0.394569	-3.69578	0.000219209	0.0061395	Zzz3
ENSMUST00000110686.2	19.1292	2.54705	0.68954	3.69384	0.00022089	0.00618193	Tmem62
ENSMUST00000180666.1	13.7929	-1.26477	0.342522	-3.69253	0.000222038	0.00620939	Gm26525
ENSMUST00000010941.5	144.943	0.618081	0.16742	3.6918	0.000222669	0.00622235	Wnt2
ENSMUST00000124407.7	20.3039	5.26737	1.42706	3.69106	0.000223318	0.0062342	Mif4gd
ENSMUST00000180624.1	29.8378	-0.766816	0.207756	-3.69094	0.000223428	0.0062342	Gm4262
ENSMUST00000055322.5	164.696	0.575368	0.155984	3.68862	0.000225472	0.00628653	Ier5
ENSMUST00000208381.1	19.9095	1.0591	0.287178	3.68795	0.00022607	0.00629847	Shcbp1
ENSMUST00000026698.7	945.232	-0.264685	0.0717745	-3.68773	0.000226265	0.00629919	Podxl
ENSMUST00000164504.1	77.9188	10.9149	2.96389	3.68262	0.000230847	0.00641717	Cfap97
ENSMUST00000018186.15	587.212	-0.508289	0.138017	-3.68281	0.000230676	0.00641717	Cyb5r3
ENSMUST00000030029.9	202.778	0.46455	0.126185	3.68149	0.000231875	0.00644094	Invs
ENSMUST00000095114.4	70.7406	-1.16165	0.315798	-3.67845	0.000234653	0.00651323	Ccl21a
ENSMUST00000068243.10	11.5465	3.04057	0.826906	3.67704	0.000235957	0.00654456	Fam73a
ENSMUST00000019276.10	995.031	-0.474321	0.129006	-3.67673	0.000236241	0.00654754	BC005537
ENSMUST00000088086.3	608.146	-0.652868	0.177651	-3.67501	0.000237837	0.00658688	Sulf2
ENSMUST00000063492.6	25.9663	-1.00767	0.274336	-3.67313	0.000239595	0.00662571	Rspo2
ENSMUST00000130287.1	8.76678	-1.69126	0.460434	-3.67319	0.000239544	0.00662571	Magix
ENSMUST00000038141.14	10.9978	-5.44175	1.48161	-3.67287	0.000239846	0.00662773	Slfn8
ENSMUST00000188942.1	32.231	-0.930378	0.253332	-3.67257	0.000240124	0.00663048	Tns1
ENSMUST00000035840.5	885.277	-0.175442	0.0477823	-3.67169	0.000240955	0.0066485	Zdhhc5
ENSMUST00000145042.1	89.6431	-0.629603	0.171499	-3.67117	0.000241445	0.00665708	5930430L01Rik
ENSMUST00000115314.2	169.494	-2.133	0.581174	-3.67015	0.000242407	0.00667867	Lpp
ENSMUST00000181782.1	29.9898	-1.18991	0.32426	-3.66963	0.000242905	0.00668744	Mhrt
ENSMUST00000099691.10	813.709	-0.547732	0.149271	-3.66938	0.000243141	0.00668898	Hk1
ENSMUST00000029271.4	65.8203	-0.681272	0.185722	-3.66824	0.000244227	0.00670975	Trpc3
ENSMUST00000207370.1	79.194	1.14139	0.311159	3.66821	0.000244256	0.00670975	Prmt1
ENSMUST00000145634.7	225.229	-0.437633	0.119363	-3.66642	0.000245967	0.00675176	Hdhd2
ENSMUST00000208821.1	184.386	0.456947	0.124652	3.66578	0.000246589	0.00676384	Ipo7
ENSMUST00000182944.7	1558.79	0.625451	0.170662	3.66486	0.000247473	0.00678309	Birc6
ENSMUST00000001592.14	197.565	-0.816593	0.222906	-3.6634	0.000248887	0.00681683	Jup
ENSMUST00000139352.7	35.3438	1.10874	0.302717	3.66263	0.000249636	0.00683232	Grip1
ENSMUST00000004683.12	97.3981	-0.5046	0.137907	-3.65899	0.000253208	0.00692498	Mcoln1
ENSMUST00000140660.1	55.6464	-0.692832	0.189371	-3.6586	0.000253592	0.00693039	Rmnd1
ENSMUST00000102549.9	130.105	-0.575879	0.157445	-3.65765	0.000254537	0.00695112	Nipal3
ENSMUST00000105650.7	14.7424	-3.59087	0.9818	-3.65743	0.000254753	0.0069519	Gpr153
ENSMUST00000035375.13	71.268	-0.936821	0.256323	-3.65485	0.000257331	0.00701714	Mdfi
ENSMUST00000102786.10	33.6602	1.41946	0.388481	3.65388	0.000258307	0.00703858	Itgb3bp
ENSMUST00000036116.5	59.7745	-0.815312	0.223211	-3.65264	0.000259554	0.00706739	Ttc9
ENSMUST00000045586.12	53.5329	7.0208	1.9223	3.65229	0.000259916	0.00707208	Lcorl
ENSMUST00000107081.7	23.9784	1.33471	0.365488	3.65187	0.000260336	0.00707315	Gm11627
ENSMUST00000066412.7	59.3317	-0.932366	0.255306	-3.65196	0.000260245	0.00707315	Agtr1a
ENSMUST00000023460.6	592.105	0.307679	0.0842891	3.65029	0.000261949	0.00711179	Ncbp2
ENSMUST00000192772.1	301.685	0.407052	0.111545	3.64922	0.000263034	0.00713606	6430511E19Rik
ENSMUST00000071944.12	150.843	-0.62424	0.171111	-3.64815	0.000264134	0.00714646	Tec
ENSMUST00000038383.13	191.577	0.746208	0.204536	3.64829	0.000263988	0.00714646	Akr1b10
ENSMUST00000039064.7	46.6569	0.640117	0.175456	3.64832	0.000263964	0.00714646	Fam124a
ENSMUST00000150768.7	6.67271	-5.16204	1.415	-3.6481	0.000264186	0.00714646	Kctd9
ENSMUST00000153976.7	10.8726	-4.76445	1.30635	-3.64716	0.000265156	0.0071571	Sympk
ENSMUST00000132227.8	15.0684	-5.26974	1.44482	-3.64733	0.000264984	0.0071571	Prmt5
ENSMUST00000170862.7	77.6631	10.8088	2.96334	3.6475	0.000264803	0.0071571	Csnk1a1
ENSMUST00000104964.2	49.3644	0.633437	0.173836	3.64387	0.000268566	0.00724389	Gm16503
ENSMUST00000080371.6	658.226	-0.325723	0.0894199	-3.64263	0.00026987	0.0072738	Mtss1
ENSMUST00000109790.1	634.871	-0.27174	0.0746882	-3.63833	0.000274412	0.00738698	Asxl1
ENSMUST00000057773.4	18.9686	-0.913654	0.251123	-3.63828	0.000274466	0.00738698	Mblac1
ENSMUST00000085814.3	395.368	-0.367153	0.100994	-3.63538	0.00027757	0.00746512	Ncoa1
ENSMUST00000141250.1	140.637	0.867174	0.238565	3.63496	0.000278025	0.00747194	Alpk2
ENSMUST00000155023.7	62.4342	-0.621843	0.17113	-3.63375	0.000279331	0.00750162	Kazn
ENSMUST00000102922.9	180.1	0.7122	0.196059	3.63259	0.000280591	0.00753004	Pold2
ENSMUST00000193006.1	243.37	0.549895	0.151403	3.632	0.000281233	0.00754183	Pcdhgb5
ENSMUST00000027186.11	1539.16	-0.282452	0.0778267	-3.62924	0.000284257	0.00759864	Trak2
ENSMUST00000132985.1	196.928	-1.02306	0.281907	-3.62905	0.000284461	0.00759864	Myl9
ENSMUST00000018353.13	611.827	0.202748	0.0558697	3.62895	0.000284576	0.00759864	Stk4
ENSMUST00000138390.7	7.46433	-2.68116	0.738649	-3.62981	0.000283626	0.00759864	4930412C18Rik
ENSMUST00000174548.7	10.3738	-1.98781	0.54768	-3.62951	0.000283959	0.00759864	Hnrnpl
ENSMUST00000142743.7	97.2105	0.545474	0.15031	3.62899	0.000284531	0.00759864	Ice2
ENSMUST00000046386.4	213.658	-0.492605	0.135768	-3.62828	0.00028532	0.00760758	Zcchc14
ENSMUST00000102650.9	286.236	-0.345918	0.0953347	-3.62846	0.000285116	0.00760758	Akap10
ENSMUST00000148119.7	113.044	0.408136	0.112526	3.62703	0.0002867	0.0076389	Setd3
ENSMUST00000131842.1	92.0952	-0.665076	0.183428	-3.62582	0.000288045	0.00766925	Pld1
ENSMUST00000177643.1	5079.19	0.714774	0.197157	3.62541	0.000288504	0.00767599	Gm25890
ENSMUST00000099684.3	84.2182	1.3992	0.386188	3.6231	0.000291096	0.00772854	Gm10801
ENSMUST00000066617.11	162.739	-9.06852	2.50298	-3.62309	0.000291103	0.00772854	Zkscan1
ENSMUST00000041544.7	120.541	-2.67165	0.737375	-3.62319	0.000290996	0.00772854	Fbln2
ENSMUST00000081349.8	25.6398	-1.15635	0.319208	-3.62257	0.000291695	0.00773876	Fmn1
ENSMUST00000106001.7	194.4	-0.683067	0.188582	-3.62212	0.000292204	0.00774674	Col16a1
ENSMUST00000084289.4	109.326	-0.480957	0.132834	-3.62073	0.00029377	0.0077827	Ago4
ENSMUST00000146623.7	294.69	-0.443329	0.122505	-3.61886	0.000295901	0.00783358	Gpd1l
ENSMUST00000035661.5	217.422	-0.689787	0.190702	-3.61709	0.000297935	0.00787936	Cspg4
ENSMUST00000050228.14	37.7455	-1.09807	0.303588	-3.61699	0.000298053	0.00787936	Tmem241
ENSMUST00000065856.6	180.917	-0.393175	0.108739	-3.61578	0.00029944	0.0079104	Hunk
ENSMUST00000046945.12	55.4769	-1.23832	0.342547	-3.61503	0.000300309	0.00792773	Palm
ENSMUST00000021207.6	111.215	-0.473377	0.130974	-3.61429	0.000301177	0.007945	Fam101b
ENSMUST00000192174.5	14.9738	1.08739	0.300887	3.61396	0.000301554	0.00794932	Thap6
ENSMUST00000091252.4	635.155	-0.580347	0.160618	-3.61321	0.00030243	0.00796522	Sec16a
ENSMUST00000032359.14	338.35	0.565736	0.15658	3.61308	0.000302585	0.00796522	Aebp2
ENSMUST00000028999.11	1447.6	0.362328	0.100334	3.6112	0.000304779	0.0080173	Pkia
ENSMUST00000085818.5	116.981	-0.411185	0.113965	-3.60798	0.000308587	0.00811173	Kcnk6
ENSMUST00000008542.11	465.811	-0.29111	0.080713	-3.60673	0.000310085	0.00814536	Elk3
ENSMUST00000140373.7	42.4894	-0.907939	0.251822	-3.60547	0.000311583	0.00817894	Sclt1
ENSMUST00000075451.11	203.041	0.639681	0.17746	3.60466	0.000312566	0.00819896	Cr1l
ENSMUST00000182100.7	378.391	-0.54537	0.151319	-3.6041	0.000313238	0.00821082	Rian
ENSMUST00000054963.9	378.194	0.293756	0.0815164	3.60364	0.000313795	0.00821961	Fdft1
ENSMUST00000062292.3	117.511	-0.431886	0.119861	-3.60323	0.000314283	0.00822661	Foxc1
ENSMUST00000082152.4	154.307	-0.59941	0.166369	-3.6029	0.000314692	0.00822844	Ube2o
ENSMUST00000044332.15	68.3855	-1.2034	0.334017	-3.60281	0.000314795	0.00822844	Cerk
ENSMUST00000107731.8	12.0686	-1.60259	0.445176	-3.5999	0.000318343	0.0083095	Col15a1
ENSMUST00000139991.1	27.306	-1.1903	0.330636	-3.60004	0.000318173	0.0083095	Stc2
ENSMUST00000069763.2	54.3603	1.0213	0.283853	3.59798	0.000320698	0.00836513	Lancl3
ENSMUST00000138308.1	17.26	1.34931	0.375097	3.59723	0.000321626	0.00838345	Casp12
ENSMUST00000161748.7	58.6181	0.879155	0.244439	3.59663	0.00032237	0.00839004	Dars2
ENSMUST00000051937.8	172.078	1.07038	0.29762	3.59648	0.000322555	0.00839004	Rasl11b
ENSMUST00000108492.8	462.471	-0.692136	0.19243	-3.59682	0.000322137	0.00839004	Hif3a
ENSMUST00000040008.3	598.622	-0.25736	0.0715659	-3.59613	0.000322991	0.00839551	Ube2r2
ENSMUST00000154145.1	257.195	-0.498046	0.138557	-3.59451	0.000325002	0.00843811	Olfml3
ENSMUST00000124470.7	76.6645	0.511589	0.142328	3.59445	0.000325083	0.00843811	Prlr
ENSMUST00000203563.1	27.3677	-0.89389	0.248789	-3.59297	0.000326936	0.00848028	Antxr1
ENSMUST00000195589.5	20.7401	-1.27598	0.355286	-3.59142	0.000328882	0.00852483	Clec7a
ENSMUST00000187023.6	5.39765	-3.42419	0.953618	-3.59074	0.000329742	0.00853523	R3hdm1
ENSMUST00000141597.1	88.339	0.851074	0.237016	3.59078	0.000329685	0.00853523	Csnk2a1
ENSMUST00000038949.4	26.3112	-0.999469	0.278414	-3.58986	0.000330857	0.00855814	Adrb1
ENSMUST00000179224.7	24.6102	-1.06147	0.295742	-3.58918	0.000331721	0.00857452	Hnrnpf
ENSMUST00000146726.7	18.8456	0.928151	0.258623	3.58882	0.000332174	0.00858029	Mier3
ENSMUST00000039725.11	211.488	-0.334501	0.0932324	-3.58782	0.000333451	0.00860729	Exo1
ENSMUST00000142153.7	218.071	0.556983	0.155388	3.58447	0.000337764	0.00871176	Ccnl1
ENSMUST00000151698.7	39.442	-0.874855	0.244079	-3.58431	0.000337966	0.00871176	Laptm5
ENSMUST00000210683.1	26.2887	-1.28809	0.359404	-3.58396	0.00033842	0.00871741	Gm3912
ENSMUST00000171533.7	3477.66	0.271008	0.075674	3.58125	0.000341949	0.00880222	Nrep
ENSMUST00000056028.10	217.25	-0.588368	0.16439	-3.57911	0.000344764	0.00886857	Sbk1
ENSMUST00000107896.9	258.354	-0.631004	0.176416	-3.5768	0.000347828	0.0089412	Trim25
ENSMUST00000032909.8	334.1	0.377759	0.10563	3.57625	0.000348556	0.00895196	Pde3b
ENSMUST00000025590.9	619.742	-0.27107	0.0757999	-3.57612	0.000348728	0.00895196	Osbp
ENSMUST00000001108.10	364.538	0.593585	0.166126	3.5731	0.000352777	0.00904967	Add1
ENSMUST00000146233.7	29.1713	1.16069	0.324903	3.57243	0.00035368	0.00906659	Xaf1
ENSMUST00000156154.1	44.1599	0.725444	0.203131	3.57131	0.000355203	0.00909936	Men1
ENSMUST00000034214.6	13.3905	-1.66392	0.46602	-3.5705	0.000356303	0.00912092	Mt2
ENSMUST00000063551.5	141.57	-0.414921	0.116214	-3.57033	0.000356535	0.00912092	Rgs7bp
ENSMUST00000073556.11	47.8443	-1.39098	0.38988	-3.56773	0.000360093	0.00920563	Mdga1
ENSMUST00000036113.3	400.819	-0.391075	0.109628	-3.56729	0.000360694	0.00921405	Tbc1d16
ENSMUST00000068258.2	18.4729	-1.00834	0.282677	-3.56713	0.000360918	0.00921405	9130008F23Rik
ENSMUST00000180429.2	47.6484	0.787289	0.220766	3.56617	0.000362231	0.00924123	Gm26670
ENSMUST00000143533.7	79.8174	-0.865928	0.243019	-3.56321	0.000366345	0.00933979	Snapc3
ENSMUST00000154221.1	78.1748	-0.582453	0.163512	-3.56213	0.000367853	0.00937182	Ppfibp1
ENSMUST00000169897.1	35.5657	-6.87871	1.93163	-3.5611	0.000369308	0.00940245	Gcnt1
ENSMUST00000033136.8	91.6691	-0.662943	0.186216	-3.56008	0.000370741	0.00943248	Bag3
ENSMUST00000105502.7	523.858	-0.421886	0.118515	-3.55976	0.000371188	0.0094374	Foxo3
ENSMUST00000191632.1	19.4837	-0.980198	0.275389	-3.55932	0.000371817	0.00944694	D330025C20Rik
ENSMUST00000020692.6	407.06	0.426185	0.119766	3.55848	0.000373003	0.0094665	Btg2
ENSMUST00000005431.5	198.78	-0.483205	0.135792	-3.55842	0.000373095	0.0094665	Letm1
ENSMUST00000115385.1	18.5655	1.06746	0.300064	3.55745	0.000374472	0.00949496	Adam22
ENSMUST00000056482.13	469.494	-0.387734	0.109009	-3.55691	0.000375248	0.00950816	Itsn1
ENSMUST00000167487.7	1433.16	-0.463474	0.130379	-3.55482	0.000378239	0.00957742	Vldlr
ENSMUST00000196687.1	44.6082	0.583952	0.16429	3.5544	0.000378846	0.00958626	Ap1ar
ENSMUST00000022327.11	86.5745	-10.5312	2.96301	-3.55422	0.000379106	0.00958633	Ldb3
ENSMUST00000047331.6	80.268	0.726073	0.204348	3.55313	0.000380678	0.00961954	Lgi3
ENSMUST00000160549.1	18.3176	-2.41352	0.679336	-3.55276	0.000381205	0.00962634	Timm44
ENSMUST00000181241.1	1084.38	-0.417277	0.117469	-3.55221	0.000382005	0.00963999	Gm26869
ENSMUST00000162638.1	24.2753	5.63135	1.58685	3.54876	0.000387044	0.00976054	Cdc73
ENSMUST00000026672.7	91.157	-0.620619	0.17497	-3.547	0.000389641	0.00981938	Pde8a
ENSMUST00000166249.1	16.4283	1.30393	0.367678	3.5464	0.000390539	0.00983535	Kif5b
ENSMUST00000002280.10	33.7812	-0.967629	0.272968	-3.54484	0.000392853	0.00988693	Smg9
ENSMUST00000080443.6	39.531	-7.15944	2.02075	-3.54297	0.000395645	0.00994376	Rps18-ps3
ENSMUST00000112514.1	800.714	-0.446959	0.126152	-3.54303	0.000395552	0.00994376	Ltbp1
ENSMUST00000121791.7	109.141	-10.4968	2.96288	-3.54275	0.000395981	0.00994549	Tm9sf1
ENSMUST00000163011.1	22.9023	4.63727	1.30923	3.54198	0.000397143	0.00996793	Lamc1
ENSMUST00000151503.1	130.877	-0.789694	0.223002	-3.5412	0.000398307	0.00999043	Son
ENSMUST00000074322.11	49.1938	-7.08162	2.00076	-3.53946	0.000400943	0.0100498	Zfp568
ENSMUST00000181242.1	405.551	1.28574	0.36331	3.53896	0.000401701	0.010062	Gm26870
ENSMUST00000056288.6	9.06693	-2.02624	0.572708	-3.53799	0.000403178	0.0100786	AI467606
ENSMUST00000110452.1	85.9276	-1.43308	0.405041	-3.53812	0.000402982	0.0100786	Hist1h2bj
ENSMUST00000042664.9	193.801	-0.532565	0.150515	-3.53828	0.000402741	0.0100786	Slc16a2
ENSMUST00000134149.1	26.9566	-1.39393	0.394152	-3.53652	0.000405432	0.0101282	Lclat1
ENSMUST00000110529.5	294.107	-0.47605	0.134625	-3.53613	0.000406042	0.0101366	Flt1
ENSMUST00000088874.9	14.7128	-2.42287	0.685302	-3.53548	0.000407039	0.0101547	Hmgb3
ENSMUST00000070886.8	9.40168	1.87942	0.531903	3.5334	0.000410253	0.0102143	Zcchc9
ENSMUST00000119483.1	664.129	-0.633863	0.179389	-3.53344	0.000410182	0.0102143	Synpo2l
ENSMUST00000036606.13	290.535	-0.54946	0.155501	-3.53348	0.000410123	0.0102143	Stard8
ENSMUST00000194208.5	11.7874	2.83713	0.803039	3.53299	0.000410887	0.0102233	Cd1d2
ENSMUST00000032551.7	310.141	0.236358	0.0669271	3.53157	0.000413095	0.0102714	Zik1
ENSMUST00000156876.7	227.867	-0.436017	0.123485	-3.53094	0.000414091	0.0102877	Mfsd6
ENSMUST00000050646.12	262.726	-0.297012	0.0841202	-3.5308	0.000414305	0.0102877	Ttc19
ENSMUST00000038572.14	231.951	-0.586249	0.166066	-3.53022	0.000415213	0.0103034	Hnrnpl
ENSMUST00000135637.1	23.2579	-0.917523	0.259929	-3.52989	0.000415731	0.0103039	Cnrip1
ENSMUST00000017610.9	646.398	-0.353905	0.10027	-3.5295	0.00041634	0.0103039	Timp2
ENSMUST00000180772.1	35.43	-0.732108	0.207422	-3.52956	0.000416253	0.0103039	Gm26773
ENSMUST00000115799.1	201.549	-0.487131	0.138007	-3.52975	0.000415946	0.0103039	Arid1b
ENSMUST00000137907.1	14.0245	-1.07724	0.305286	-3.52862	0.000417727	0.0103313	Cep112os1
ENSMUST00000041080.5	118.577	-0.691327	0.195978	-3.52757	0.000419394	0.0103657	Fzd8
ENSMUST00000069399.6	46.3743	-1.81548	0.514684	-3.52737	0.000419705	0.0103665	Kbtbd11
ENSMUST00000025270.6	1459.19	0.419822	0.119024	3.5272	0.000419987	0.0103666	Riok3
ENSMUST00000079625.10	54.3329	0.701523	0.198938	3.52634	0.000421343	0.0103931	Tor3a
ENSMUST00000030263.8	41.2077	-1.07839	0.305856	-3.52581	0.000422187	0.010407	St3gal3
ENSMUST00000202747.3	30.69	-4.02039	1.14043	-3.52532	0.000422973	0.0104195	Tbl1xr1
ENSMUST00000112550.7	1063.67	-0.391915	0.11118	-3.52503	0.000423431	0.0104239	Baz2b
ENSMUST00000075812.10	122.236	-10.4426	2.963	-3.52434	0.000424541	0.0104443	Whsc1
ENSMUST00000024705.4	143.536	0.398462	0.113078	3.52378	0.00042544	0.0104595	Slc25a27
ENSMUST00000198526.4	14.6032	-1.80313	0.511749	-3.52346	0.000425957	0.0104641	Srrt
ENSMUST00000041093.5	995.631	-0.503692	0.142964	-3.52322	0.000426332	0.0104641	Creb3l2
ENSMUST00000130481.1	51.3746	0.613061	0.174018	3.52296	0.000426749	0.0104641	Plcxd2
ENSMUST00000045956.13	14.2132	-4.72313	1.34062	-3.52309	0.000426551	0.0104641	Cchcr1
ENSMUST00000182345.1	53.0402	-0.879616	0.249738	-3.52215	0.000428062	0.0104741	Gm26984
ENSMUST00000029815.7	272.91	-0.486534	0.138148	-3.52184	0.000428564	0.0104741	Cisd2
ENSMUST00000206856.1	30.397	-1.41071	0.400509	-3.52229	0.000427831	0.0104741	Gm19514
ENSMUST00000104423.1	124.808	0.846932	0.240472	3.52196	0.000428368	0.0104741	Gm23946
ENSMUST00000159784.7	63.3857	-0.584526	0.165958	-3.52214	0.000428079	0.0104741	Glud1
ENSMUST00000087865.3	325.022	-0.5188	0.147351	-3.52084	0.000430176	0.0105066	Ybx3
ENSMUST00000170335.3	2409.92	0.395695	0.112424	3.51968	0.000432068	0.0105459	Rps2-ps10
ENSMUST00000190780.6	163.966	-10.5662	3.00336	-3.51813	0.000434594	0.0105993	Fn1
ENSMUST00000201887.3	34.2615	-0.906356	0.257635	-3.51799	0.000434827	0.0105993	Atraid
ENSMUST00000199066.1	69.0313	-0.593866	0.168877	-3.51655	0.000437192	0.01065	Zfp68
ENSMUST00000109266.10	60.8919	-6.55069	1.8645	-3.51337	0.000442463	0.0107684	Zmynd8
ENSMUST00000136481.7	156.98	10.4091	2.9628	3.51327	0.000442631	0.0107684	Prpf6
ENSMUST00000120870.1	19.248	1.26585	0.360346	3.51288	0.000443275	0.01077	Gm13230
ENSMUST00000038038.7	33.452	-0.956031	0.27214	-3.51301	0.000443057	0.01077	Slfn2
ENSMUST00000160877.7	8.2611	-1.58398	0.451034	-3.51188	0.000444955	0.0108037	Rad52
ENSMUST00000064141.11	18.174	3.79248	1.07999	3.51159	0.000445428	0.0108082	Dcaf17
ENSMUST00000075447.13	96.6982	-0.527781	0.150319	-3.51107	0.0004463	0.0108223	Nectin2
ENSMUST00000033023.9	49.1986	-1.11042	0.316396	-3.50959	0.000448792	0.0108756	Aqp8
ENSMUST00000208794.1	10.7751	1.41001	0.401798	3.50926	0.000449355	0.0108822	Gm44516
ENSMUST00000026303.15	21.6321	4.59105	1.30834	3.50907	0.000449672	0.0108828	Apex2
ENSMUST00000090380.4	347.853	-0.465175	0.132613	-3.50777	0.000451886	0.0109292	Lmbrd2
ENSMUST00000201271.3	16.546	-5.42455	1.54732	-3.50577	0.000455296	0.0110046	Rgs6
ENSMUST00000051442.6	122.71	-0.42597	0.121523	-3.50526	0.000456158	0.0110182	Pcdhb16
ENSMUST00000037615.6	394.892	-0.487973	0.139236	-3.50464	0.000457219	0.0110367	Aldh5a1
ENSMUST00000146908.1	77.2619	-0.857194	0.244657	-3.50365	0.000458922	0.0110706	Tcf4
ENSMUST00000148517.7	90.5965	-0.829302	0.236822	-3.50179	0.000462145	0.0111412	Mfap5
ENSMUST00000153211.1	56.3264	-0.539927	0.154199	-3.50151	0.000462635	0.0111458	Iars2
ENSMUST00000046859.10	363.764	-0.352814	0.100779	-3.50086	0.000463754	0.0111655	Foxn3
ENSMUST00000203499.1	5.19883	3.64886	1.04234	3.50065	0.000464131	0.0111673	BC049715
ENSMUST00000128960.1	848.307	-0.287571	0.0821538	-3.5004	0.000464556	0.0111704	Brip1os
ENSMUST00000171071.8	196.965	-0.454622	0.129921	-3.49921	0.000466633	0.011213	Zfp236
ENSMUST00000097531.2	57.7992	0.638838	0.182636	3.49788	0.00046897	0.0112619	Gm5532
ENSMUST00000142067.7	37.4896	-1.70038	0.486345	-3.49623	0.000471873	0.0113244	1500017E21Rik
ENSMUST00000176896.7	39.9386	1.49338	0.427334	3.49463	0.000474713	0.0113852	Nptn
ENSMUST00000113438.7	975.2	-0.333519	0.0954516	-3.49412	0.000475628	0.0113998	Adamts9
ENSMUST00000150092.1	45.7224	-3.42674	0.980788	-3.49386	0.00047609	0.0114035	Zfp945
ENSMUST00000019199.13	485.832	-0.413689	0.118465	-3.49208	0.00047928	0.0114725	Plod1
ENSMUST00000047697.11	40.4475	-0.924089	0.264655	-3.49167	0.000480002	0.0114824	Trim17
ENSMUST00000116403.8	1012.9	0.279362	0.0800139	3.49141	0.000480474	0.0114863	Hnrnpk
ENSMUST00000097888.9	360.885	-0.401405	0.114987	-3.49087	0.000481451	0.0115023	Ago1
ENSMUST00000022207.8	52.063	0.813807	0.233169	3.49021	0.000482643	0.0115234	Elovl7
ENSMUST00000159048.7	82.6441	10.3414	2.96318	3.48996	0.000483097	0.0115268	Cacna1h
ENSMUST00000029126.14	862.111	-0.584619	0.167586	-3.48847	0.000485791	0.0115763	Itch
ENSMUST00000106102.8	172.964	0.537087	0.153955	3.48859	0.000485568	0.0115763	Zmym1
ENSMUST00000143219.7	363.538	-0.321838	0.0922678	-3.48808	0.000486498	0.0115857	Pitpna
ENSMUST00000025230.14	19.0545	-2.8933	0.829584	-3.48765	0.000487283	0.011597	C2
ENSMUST00000205318.1	295.207	-0.381396	0.109362	-3.48746	0.000487629	0.0115978	Man2a2
ENSMUST00000090192.11	1004.51	0.182983	0.0525156	3.48435	0.000493336	0.011726	Ube2l3
ENSMUST00000071750.12	1055.54	-0.565039	0.162245	-3.48263	0.000496514	0.011794	Col12a1
ENSMUST00000128530.1	10.0933	6.82624	1.96038	3.48209	0.000497508	0.0118101	2005-03-01
ENSMUST00000181572.1	338.401	1.40169	0.40268	3.48092	0.000499702	0.0118546	Gm26870
ENSMUST00000115079.7	218.468	0.818081	0.23512	3.47943	0.000502488	0.0119131	Rpl35a
ENSMUST00000055604.5	52.8688	-0.645158	0.185451	-3.47886	0.000503559	0.0119309	Zfp526
ENSMUST00000146703.1	23.6202	-1.1537	0.331703	-3.47811	0.000504962	0.0119565	Arid1b
ENSMUST00000171565.7	10.1562	5.33934	1.53556	3.47713	0.000506808	0.0119926	Map3k12
ENSMUST00000031045.9	67.5355	-0.730547	0.210135	-3.47656	0.000507885	0.0120105	Yipf7
ENSMUST00000141565.7	75.5506	0.540771	0.155579	3.47587	0.000509206	0.0120341	Elmod2
ENSMUST00000040260.10	35.6902	-0.829847	0.23877	-3.4755	0.000509894	0.0120427	Frrs1
ENSMUST00000204916.2	331.208	-0.520884	0.149907	-3.47472	0.000511384	0.0120702	Adprhl1
ENSMUST00000162360.7	12.6569	-5.00187	1.44018	-3.47308	0.000514519	0.0121365	Atp5j2
ENSMUST00000183096.7	9.70721	-2.00408	0.577144	-3.47241	0.000515813	0.012158	Sipa1l3
ENSMUST00000131215.1	54.8165	0.773098	0.222649	3.47227	0.000516083	0.012158	2610204G07Rik
ENSMUST00000189347.6	8.07678	6.60646	1.90355	3.4706	0.000519303	0.0122261	Stat1
ENSMUST00000185314.1	104.442	-0.531723	0.153244	-3.46979	0.000520864	0.0122551	Mast4
ENSMUST00000107272.5	26.3169	5.16872	1.48972	3.46958	0.000521264	0.0122568	Cgn
ENSMUST00000183040.2	17.2106	-1.17584	0.338989	-3.46868	0.000523022	0.0122904	Rxfp1
ENSMUST00000196729.1	108.835	-0.458595	0.132281	-3.46682	0.000526653	0.0123679	Map4
ENSMUST00000115330.7	254.991	0.65136	0.187943	3.46573	0.000528799	0.0124104	Pot1a
ENSMUST00000036225.14	298.16	-0.37694	0.108793	-3.46476	0.000530698	0.0124472	Mpp6
ENSMUST00000206368.1	57.2801	0.528834	0.152778	3.46146	0.000537253	0.0125874	Mat2a
ENSMUST00000077453.11	173.551	-0.707211	0.204313	-3.46141	0.000537355	0.0125874	Dapk1
ENSMUST00000144516.7	53.211	-0.606537	0.175341	-3.45919	0.000541808	0.0126838	Stk38
ENSMUST00000127385.1	21.3642	0.912133	0.263728	3.45862	0.000542959	0.0126947	Celf1
ENSMUST00000033229.4	12936.1	1.33398	0.38568	3.45876	0.000542659	0.0126947	Hbb-y
ENSMUST00000052168.5	67.4902	-0.529709	0.153222	-3.45714	0.000545944	0.0127565	Otud1
ENSMUST00000198759.4	24.3343	1.08329	0.313522	3.45524	0.000549813	0.0128389	Dennd1b
ENSMUST00000195905.4	91.3887	-0.611509	0.177025	-3.45436	0.000551593	0.0128723	Frrs1
ENSMUST00000078021.12	172.992	1.42033	0.411612	3.45067	0.000559205	0.0130418	Glmn
ENSMUST00000029069.12	189.902	0.441998	0.128152	3.44902	0.000562623	0.0131051	E2f5
ENSMUST00000018755.9	33.3544	-0.76677	0.222306	-3.44916	0.000562335	0.0131051	Pdlim4
ENSMUST00000077422.11	23.3058	-4.73286	1.37262	-3.44805	0.00056464	0.0131217	Zfp661
ENSMUST00000030401.13	351.584	-0.816926	0.236901	-3.44838	0.000563958	0.0131217	Ndufs5
ENSMUST00000197890.4	784.898	-0.522991	0.151669	-3.44825	0.000564241	0.0131217	Cd36
ENSMUST00000032151.2	114.884	-0.595089	0.172589	-3.448	0.000564745	0.0131217	Eif4e3
ENSMUST00000132760.7	8.7768	-4.64436	1.34742	-3.44686	0.000567143	0.0131632	Galt
ENSMUST00000005493.13	295.724	0.452672	0.13133	3.44681	0.000567239	0.0131632	Slc1a3
ENSMUST00000110372.8	145.736	-1.61051	0.467395	-3.44571	0.000569556	0.0132087	Acsl1
ENSMUST00000074515.10	25.5954	8.14584	2.36462	3.44489	0.000571301	0.013241	Rffl
ENSMUST00000186885.1	25.2478	-1.13448	0.329485	-3.44318	0.000574914	0.0133164	Gm28187
ENSMUST00000134515.1	59.6847	0.625955	0.181886	3.44146	0.000578578	0.0133929	Hsp90b1
ENSMUST00000200150.1	27.3112	-1.04397	0.303433	-3.44053	0.000580584	0.013431	Gm43673
ENSMUST00000039516.3	219.973	-0.759142	0.220721	-3.43938	0.000583057	0.0134798	Egln3
ENSMUST00000031055.7	371.417	-0.637156	0.185539	-3.43407	0.000594583	0.0137378	Emilin1
ENSMUST00000159532.1	59.2619	0.631588	0.184004	3.43247	0.000598101	0.0138105	Stab1
ENSMUST00000195354.5	109.882	0.677731	0.197485	3.43181	0.000599572	0.0138359	Syt14
ENSMUST00000173602.1	9.0839	-2.60691	0.759872	-3.43072	0.000601979	0.0138828	H2-K1
ENSMUST00000164766.7	8.94225	1.47595	0.43069	3.42695	0.0006104	0.0140683	Rem2
ENSMUST00000195044.1	75.9258	0.746385	0.217911	3.42519	0.00061437	0.014151	Rfwd2
ENSMUST00000181764.7	75.6948	0.599657	0.175123	3.4242	0.000616604	0.014185	6030443J06Rik
ENSMUST00000162049.1	11.3816	2.98481	0.871658	3.42429	0.000616419	0.014185	Slc4a8
ENSMUST00000036865.12	215.518	-0.47469	0.138651	-3.42363	0.000617911	0.0142062	Fanci
ENSMUST00000164342.8	31.0556	-1.4128	0.41273	-3.42307	0.000619187	0.0142268	Tjap1
ENSMUST00000100036.9	22.6463	3.16654	0.925108	3.42288	0.000619609	0.0142277	Sgk1
ENSMUST00000005532.7	2365.55	-0.296629	0.0867139	-3.42078	0.000624428	0.0143295	Nid1
ENSMUST00000068505.9	982.871	-0.355548	0.103969	-3.41974	0.000626821	0.0143602	Capn2
ENSMUST00000092891.5	15.0403	-1.16853	0.341688	-3.41989	0.000626467	0.0143602	Cacng7
ENSMUST00000137006.7	20.9669	1.61821	0.473204	3.41969	0.000626924	0.0143602	Eif2s3y
ENSMUST00000182770.7	18.9317	1.36702	0.399979	3.41774	0.000631433	0.0144546	Rian
ENSMUST00000078845.12	29.3964	0.977596	0.286146	3.41642	0.000634502	0.0145159	Gmfg
ENSMUST00000115995.2	319.693	-0.331798	0.0971618	-3.41491	0.000638038	0.0145879	Fads3
ENSMUST00000084433.4	43.2031	-3.03179	0.887911	-3.41452	0.000638939	0.0145913	Acer2
ENSMUST00000119311.7	36.4741	0.917169	0.268609	3.41451	0.000638973	0.0145913	Auh
ENSMUST00000001179.5	451.866	-0.290664	0.0851535	-3.41341	0.000641555	0.0146413	Pcnt
ENSMUST00000165399.1	33.1161	8.36274	2.45083	3.4122	0.0006444	0.0146972	U2af2
ENSMUST00000134681.7	82.1265	0.91554	0.268388	3.41125	0.000646655	0.0147396	Col5a2
ENSMUST00000195382.1	20.6977	-1.52248	0.446412	-3.41049	0.000648474	0.014772	Gm38357
ENSMUST00000043983.10	1086.49	-0.335377	0.0983996	-3.40831	0.000653665	0.0148812	Igsf3
ENSMUST00000141862.7	7.91104	1.67527	0.491585	3.40789	0.000654684	0.0148953	Cfap36
ENSMUST00000023532.6	245.598	0.312255	0.091694	3.40541	0.000660657	0.015022	Ccdc14
ENSMUST00000137429.1	26.718	-1.6195	0.475644	-3.40486	0.000661974	0.0150427	Rmnd1
ENSMUST00000031017.10	173.642	-0.421919	0.123933	-3.40441	0.000663064	0.0150583	Fosl2
ENSMUST00000033450.2	184.749	-0.490963	0.144346	-3.40129	0.000670687	0.0152221	Gpc4
ENSMUST00000043414.11	46.4237	-0.786269	0.231197	-3.40087	0.00067172	0.0152363	Dennd3
ENSMUST00000165536.7	560.755	-0.310353	0.0913125	-3.3988	0.00067682	0.0153426	Klf3
ENSMUST00000027792.5	390.291	0.4522	0.133055	3.39861	0.000677304	0.0153443	Srp9
ENSMUST00000042766.5	1066.42	0.352863	0.103909	3.3959	0.000684037	0.0154874	Ppm1k
ENSMUST00000092227.11	288.912	-0.376623	0.110963	-3.39412	0.000688492	0.0155787	Scyl2
ENSMUST00000028389.3	132.076	-0.494922	0.145897	-3.39227	0.00069315	0.0156746	Frzb
ENSMUST00000192237.1	18.1071	7.39331	2.17973	3.39185	0.000694232	0.0156896	Txndc9
ENSMUST00000022287.5	140.772	0.614733	0.181258	3.39149	0.000695137	0.0157005	Fst
ENSMUST00000025800.14	167.637	-0.592072	0.1746	-3.39103	0.000696316	0.0157176	Pip5k1b
ENSMUST00000202758.3	50.4739	5.71935	1.6878	3.38864	0.000702406	0.0158413	Eif2b4
ENSMUST00000114840.1	19.4982	-1.15381	0.340503	-3.38854	0.000702647	0.0158413	Thy1
ENSMUST00000037489.14	27.986	-6.2713	1.85194	-3.38634	0.000708305	0.0159592	Agpat1
ENSMUST00000192448.1	24.67	1.08637	0.320906	3.38532	0.000710953	0.0159898	Gm37895
ENSMUST00000173274.1	26.1483	2.62932	0.776649	3.38546	0.000710584	0.0159898	Gne
ENSMUST00000116547.2	342.776	0.375158	0.110815	3.38543	0.000710671	0.0159898	Chic1
ENSMUST00000202086.3	44.9427	0.59736	0.176491	3.38465	0.000712685	0.0160191	D6Wsu163e
ENSMUST00000089469.5	10.7405	-4.58605	1.35588	-3.38235	0.000718685	0.0161442	Apol7b
ENSMUST00000075845.10	853.489	-0.29892	0.0883838	-3.38207	0.000719416	0.0161508	Arhgap35
ENSMUST00000017184.9	32.1737	3.22716	0.954832	3.37982	0.000725332	0.016264	Serpinb6b
ENSMUST00000176630.7	47.8662	-2.26376	0.66977	-3.37991	0.000725085	0.016264	Tcof1
ENSMUST00000093802.5	295.039	-0.249446	0.0738111	-3.37952	0.000726129	0.0162721	Cep162
ENSMUST00000015846.8	9.71519	1.52297	0.450738	3.37884	0.000727929	0.0163026	Anxa9
ENSMUST00000114579.3	16.3793	-1.24357	0.368206	-3.37739	0.000731763	0.0163786	Fndc1
ENSMUST00000141047.1	41.007	-6.47349	1.91686	-3.37713	0.000732457	0.0163843	Gm21985
ENSMUST00000067043.4	331.813	0.347823	0.103028	3.37601	0.000735458	0.0164416	Zbtb26
ENSMUST00000029814.9	443.111	-0.517113	0.15323	-3.37474	0.000738843	0.0165073	Manba
ENSMUST00000146444.7	857.543	-0.28996	0.0859305	-3.37435	0.000739904	0.0165211	Tab2
ENSMUST00000165394.8	110.498	-0.79874	0.236736	-3.37397	0.000740934	0.0165342	Ube2m
ENSMUST00000201980.3	162.09	0.671111	0.198951	3.37325	0.000742856	0.0165672	Pisd
ENSMUST00000170287.7	63.7788	0.719264	0.213301	3.37205	0.000746101	0.0166296	Hmgcr
ENSMUST00000195708.1	544.169	-0.338353	0.100388	-3.37047	0.00075041	0.0167156	Rapgef2
ENSMUST00000133359.1	17.7521	-1.09112	0.323789	-3.36984	0.000752126	0.0167438	Chid1
ENSMUST00000003908.10	489.009	-0.372178	0.110469	-3.36908	0.000754185	0.0167596	Mast2
ENSMUST00000160369.7	8.87874	-1.78755	0.530563	-3.36916	0.000753968	0.0167596	Ercc1
ENSMUST00000020403.5	2030.65	0.499939	0.148386	3.36919	0.000753904	0.0167596	Csrp2
ENSMUST00000025120.6	1034.64	0.237006	0.070441	3.3646	0.000766554	0.0170243	Elp2
ENSMUST00000073150.4	113.112	-0.496663	0.147629	-3.36427	0.000767459	0.0170342	Peli2
ENSMUST00000075578.6	517.052	0.411439	0.122366	3.36238	0.000772736	0.0171309	Abcb10
ENSMUST00000024832.7	21.9694	-2.50464	0.744872	-3.36251	0.000772373	0.0171309	Rsph1
ENSMUST00000052404.12	357.34	0.21164	0.0629991	3.35941	0.000781092	0.0172853	Epb41l5
ENSMUST00000067072.3	227.615	0.499176	0.148577	3.35971	0.000780242	0.0172853	Cthrc1
ENSMUST00000163370.7	53.1139	9.95512	2.96333	3.35943	0.000781021	0.0172853	Tiam1
ENSMUST00000111771.7	150.163	-5.39667	1.60715	-3.35791	0.000785349	0.0173691	Abcc9
ENSMUST00000156290.8	137.122	-0.807492	0.240572	-3.35655	0.000789222	0.0174402	Ttc28
ENSMUST00000121175.7	108.739	-0.708302	0.211027	-3.35645	0.000789512	0.0174402	Ltbp4
ENSMUST00000075099.4	53.3223	9.9473	2.96378	3.35629	0.000789968	0.0174402	Ctnna3
ENSMUST00000068242.8	116.154	0.757359	0.225665	3.35612	0.000790446	0.0174404	Rimklb
ENSMUST00000058578.7	326.233	-0.367221	0.109472	-3.35449	0.000795113	0.017533	Pgrmc2
ENSMUST00000169312.1	78.7109	-9.93879	2.96304	-3.35425	0.000795793	0.0175376	Chtf8
ENSMUST00000022246.8	17.0124	-1.20991	0.360843	-3.353	0.000799409	0.0176069	Fgf10
ENSMUST00000053273.14	560.041	-0.311725	0.0929779	-3.35268	0.000800339	0.0176169	Itpr2
ENSMUST00000065793.11	309.133	0.756227	0.225585	3.35229	0.000801469	0.0176314	Phgdh
ENSMUST00000063417.9	1668.53	0.305398	0.091142	3.3508	0.000805798	0.0177161	Srsf7
ENSMUST00000155442.1	35.4033	1.06691	0.318486	3.34995	0.000808252	0.0177596	Cbr4
ENSMUST00000020898.11	14.9757	-2.63888	0.788485	-3.34677	0.000817583	0.017954	Agr2
ENSMUST00000185115.7	32.9022	-1.98693	0.593769	-3.34629	0.000818994	0.0179744	Arfgap1
ENSMUST00000114900.7	164.007	-0.518247	0.1549	-3.34568	0.000820808	0.0180036	Zc3hav1
ENSMUST00000166505.6	273.207	0.437506	0.130816	3.34442	0.000824541	0.0180748	Pabpc4l
ENSMUST00000162443.7	23.4581	-1.47666	0.441611	-3.34381	0.000826361	0.0181041	C1s1
ENSMUST00000146746.1	7.74444	1.62599	0.486334	3.34336	0.000827714	0.018123	4930444E06Rik
ENSMUST00000195187.1	8.9535	1.79838	0.538016	3.34262	0.000829919	0.0181606	Gm37602
ENSMUST00000042702.6	30.6761	-1.02281	0.306029	-3.3422	0.00083116	0.0181771	Fam173b
ENSMUST00000179863.7	2797.87	-1.53075	0.458056	-3.34183	0.00083228	0.0181909	Tnnt2
ENSMUST00000020706.4	248.183	0.74553	0.223132	3.3412	0.000834178	0.0182217	Adcy1
ENSMUST00000177714.7	155.136	-0.39207	0.117351	-3.341	0.000834768	0.0182239	2010315B03Rik
ENSMUST00000203802.2	217.055	0.813266	0.243509	3.33978	0.000838451	0.0182936	Fam21
ENSMUST00000210707.1	105.076	-9.8922	2.96291	-3.33868	0.000841766	0.0183551	Svil
ENSMUST00000092723.10	91.1732	-0.673254	0.201695	-3.33798	0.000843886	0.0183906	Arid1b
ENSMUST00000090070.5	184.875	-0.706598	0.211711	-3.33756	0.000845176	0.0183996	Gimap4
ENSMUST00000056177.6	126.405	-0.783797	0.234844	-3.33752	0.000845286	0.0183996	Pacsin2
ENSMUST00000186492.1	19.6324	0.867944	0.260214	3.3355	0.000851475	0.0185234	Stk16
ENSMUST00000188746.6	66.8177	2.96962	0.890407	3.33513	0.000852594	0.0185369	Tmem181b-ps
ENSMUST00000181574.5	81.7871	-0.407732	0.1223	-3.33388	0.000856442	0.0186097	2700038G22Rik
ENSMUST00000106337.6	130.62	-0.395115	0.118522	-3.33367	0.000857082	0.0186128	Cyp2u1
ENSMUST00000037397.6	87.2665	-0.688595	0.206599	-3.33301	0.000859117	0.0186461	Cep126
ENSMUST00000194814.1	140.181	0.66934	0.200964	3.33065	0.000866441	0.0187941	Pcdhga9
ENSMUST00000078155.11	83.0412	-0.597517	0.179413	-3.3304	0.000867209	0.0187998	Impdh1
ENSMUST00000100085.7	42.6429	2.83454	0.851243	3.32988	0.00086883	0.018824	Acvr1c
ENSMUST00000147265.7	2150.09	0.259527	0.0779734	3.32841	0.000873447	0.018913	Srsf3
ENSMUST00000111416.6	290.505	-0.483919	0.14541	-3.32796	0.000874838	0.0189211	Ildr2
ENSMUST00000085133.12	1069.14	0.478229	0.143694	3.32812	0.000874347	0.0189211	Atp2c1
ENSMUST00000039990.5	93.2622	-0.770974	0.231697	-3.32751	0.000876256	0.0189408	P3h2
ENSMUST00000187353.1	54.0613	0.611074	0.18372	3.32611	0.000880667	0.0190251	Prim2
ENSMUST00000008350.15	457.15	0.292529	0.0879642	3.32555	0.000882448	0.0190525	Cers4
ENSMUST00000099274.2	879.932	-0.261302	0.0785831	-3.32517	0.000883636	0.0190671	Pdzd8
ENSMUST00000041725.13	79.2814	-0.691388	0.20795	-3.32477	0.000884906	0.0190834	Mgat4b
ENSMUST00000074862.2	13.3539	1.61502	0.485799	3.32445	0.000885919	0.0190942	Gm10101
ENSMUST00000163567.7	111.485	0.429219	0.129136	3.32377	0.000888096	0.01913	Srprb
ENSMUST00000176742.1	35.5262	0.708836	0.213386	3.32185	0.000894241	0.0192408	Gm20633
ENSMUST00000103209.9	34.3885	-0.838943	0.252554	-3.32184	0.000894273	0.0192408	Mmp28
ENSMUST00000131266.1	56.0614	0.554687	0.167025	3.32098	0.000897018	0.0192839	Eif3m
ENSMUST00000105525.10	261.62	0.264795	0.0797362	3.32089	0.00089731	0.0192839	Ahi1
ENSMUST00000080537.13	77.3367	-0.898268	0.27063	-3.31917	0.00090285	0.0193806	Rac1
ENSMUST00000179142.1	16.2617	-1.77046	0.533389	-3.31926	0.000902557	0.0193806	Fau
ENSMUST00000187666.1	51.2321	1.0448	0.314812	3.3188	0.000904051	0.0193951	Snhg14
ENSMUST00000107709.7	10.4467	-3.16562	0.954494	-3.31654	0.000911386	0.0195412	Gngt2
ENSMUST00000060805.6	1484.53	-0.213664	0.0644335	-3.31604	0.000913042	0.0195655	Fam120a
ENSMUST00000047013.3	17.0477	-1.07609	0.324565	-3.31548	0.000914853	0.0195817	Cmtm8
ENSMUST00000147781.7	163.817	-0.604779	0.182407	-3.31554	0.000914663	0.0195817	Rptor
ENSMUST00000033010.8	41.0924	-0.710249	0.214303	-3.31423	0.000918959	0.0196583	Kdm8
ENSMUST00000044423.3	336.687	-0.235864	0.0711879	-3.31326	0.000922152	0.0197153	Brip1
ENSMUST00000183898.1	9.35759	-6.22354	1.879	-3.31216	0.000925787	0.0197817	Nxf1
ENSMUST00000018113.7	212.11	-0.613843	0.185404	-3.31084	0.000930178	0.0198641	Ptgis
ENSMUST00000197455.1	12.3548	-1.1863	0.358358	-3.31036	0.000931761	0.0198865	Gm43412
ENSMUST00000135579.7	155.999	0.74147	0.22401	3.30998	0.00093302	0.0199019	Epb41
ENSMUST00000109103.3	427.842	-0.416066	0.125717	-3.30954	0.000934489	0.0199219	Hnrnpab
ENSMUST00000129593.8	33.9694	-1.00062	0.30239	-3.30904	0.000936152	0.0199459	Erlec1
ENSMUST00000137823.7	1854.73	-0.595943	0.180126	-3.30847	0.000938077	0.0199755	Usp34
ENSMUST00000032908.14	7.1504	4.56361	1.37988	3.30725	0.000942158	0.0200488	Cyp2r1
ENSMUST00000137338.1	9.68476	1.17636	0.355705	3.30712	0.000942599	0.0200488	Edrf1
ENSMUST00000102996.3	188.258	0.333823	0.100963	3.30639	0.000945056	0.0200896	4930452B06Rik
ENSMUST00000130676.2	107.884	-0.592679	0.179308	-3.30537	0.000948501	0.0201513	Snapc3
ENSMUST00000105951.7	31.363	3.31154	1.00213	3.30449	0.000951492	0.0202033	Rcc1
ENSMUST00000022629.8	1685.9	-0.33987	0.102866	-3.304	0.000953147	0.0202269	Dpysl2
ENSMUST00000182968.7	229.782	0.310698	0.0940623	3.30311	0.000956199	0.0202801	Rsrc2
ENSMUST00000209587.1	15.475	0.955692	0.289391	3.30243	0.000958525	0.0203179	Zfp330
ENSMUST00000091257.10	281.045	-0.449328	0.136067	-3.30226	0.000959107	0.0203187	Mfn1
ENSMUST00000204066.1	12.8204	1.26284	0.382552	3.3011	0.000963061	0.0203908	Zfp9
ENSMUST00000131327.7	24.5382	0.912871	0.276725	3.29884	0.000970861	0.0205443	Tcirg1
ENSMUST00000064244.10	97.1973	-9.77097	2.9629	-3.29778	0.000974538	0.0205999	Rexo4
ENSMUST00000127027.1	319.203	0.435823	0.132157	3.29776	0.000974595	0.0205999	Zfp960
ENSMUST00000027629.9	115.03	0.73334	0.222389	3.29756	0.0009753	0.0206031	Tfcp2l1
ENSMUST00000179876.1	910.117	0.862894	0.261765	3.29645	0.000979142	0.0206725	Gm25939
ENSMUST00000108929.2	39.9572	-0.725652	0.220171	-3.29586	0.00098122	0.0206826	Gm14399
ENSMUST00000129349.1	29.6845	-1.06622	0.323487	-3.29603	0.000980631	0.0206826	Tsc22d4
ENSMUST00000022176.14	849.569	0.30999	0.0940549	3.29584	0.000981286	0.0206826	Hmgcr
ENSMUST00000152672.1	625.202	-0.313357	0.0950854	-3.29553	0.000982348	0.0206932	Tulp4
ENSMUST00000031853.7	8.30045	1.71794	0.521438	3.29462	0.000985548	0.0207489	Npvf
ENSMUST00000024954.9	103.221	-0.814693	0.247293	-3.29444	0.00098618	0.0207505	Epas1
ENSMUST00000035804.7	235.994	0.487597	0.148051	3.29343	0.000989738	0.0208136	Cdo1
ENSMUST00000169611.2	880.335	0.496876	0.150938	3.29192	0.000995056	0.0209136	Mut
ENSMUST00000094499.10	258.223	-0.833775	0.253378	-3.29064	0.000999605	0.0209857	Kif1c
ENSMUST00000113195.7	66.1842	-0.666387	0.20251	-3.29064	0.000999614	0.0209857	Rftn1
ENSMUST00000049412.11	19.3874	-4.71117	1.43193	-3.29008	0.0010016	0.0209968	Stau1
ENSMUST00000110221.8	1122.13	-0.850457	0.258497	-3.29001	0.00100183	0.0209968	Col14a1
ENSMUST00000123101.7	12.8445	3.52558	1.07159	3.29006	0.00100167	0.0209968	Myh9
ENSMUST00000197974.1	38.638	0.654217	0.198907	3.28905	0.00100526	0.0210567	Sbno1
ENSMUST00000095580.2	146.862	-0.619393	0.188347	-3.28858	0.00100695	0.0210802	Mypn
ENSMUST00000148810.7	281.845	-0.710292	0.216017	-3.28813	0.00100856	0.0210869	Fam129a
ENSMUST00000134244.1	57.023	-1.08123	0.328847	-3.28794	0.00100924	0.0210869	Cxcl12
ENSMUST00000103110.9	126.146	-0.655972	0.199514	-3.28786	0.00100953	0.0210869	Atp6v0a1
ENSMUST00000018851.13	7010.18	-0.323427	0.0983582	-3.28825	0.00100812	0.0210869	Dync1h1
ENSMUST00000202060.3	13.1455	-2.59029	0.787944	-3.2874	0.00101117	0.0211091	Agbl5
ENSMUST00000152600.1	28.2444	0.689654	0.209849	3.28642	0.00101468	0.0211707	Gm15344
ENSMUST00000086010.6	24.0445	-1.11231	0.338513	-3.28586	0.0010167	0.021201	Zfp114
ENSMUST00000153938.2	67.0583	0.488997	0.148836	3.28547	0.00101811	0.0212184	Camta1
ENSMUST00000108493.2	133.885	-0.454979	0.138567	-3.28346	0.0010254	0.0213548	Dact3
ENSMUST00000112391.7	22.3052	0.929394	0.283063	3.28335	0.0010258	0.0213548	2005-03-01
ENSMUST00000034048.12	421.483	-0.381038	0.116093	-3.28219	0.00103005	0.0214313	Cfap97
ENSMUST00000138283.1	45.8741	3.17273	0.966729	3.28192	0.00103102	0.0214395	Ndfip2
ENSMUST00000032179.13	150.339	-0.512135	0.156103	-3.28076	0.00103528	0.021516	Nup210
ENSMUST00000115446.7	46.2203	-7.76494	2.36696	-3.28055	0.00103605	0.0215201	Cldn12
ENSMUST00000004343.6	270.197	0.38968	0.118823	3.2795	0.00103992	0.0215762	Wars2
ENSMUST00000190365.6	10.2595	4.77952	1.45734	3.27962	0.00103947	0.0215762	Sytl2
ENSMUST00000150000.1	207.974	-0.570882	0.174102	-3.279	0.00104174	0.0216021	Mib1
ENSMUST00000027881.14	9.07941	-6.25305	1.90925	-3.27513	0.00105615	0.0218886	Sec16b
ENSMUST00000072061.11	110.005	9.70329	2.9632	3.2746	0.00105812	0.0219173	Entpd5
ENSMUST00000105866.2	31.3933	-0.783641	0.239351	-3.27403	0.00106025	0.0219493	Aunip
ENSMUST00000131381.1	27.7626	1.03403	0.315905	3.27322	0.0010633	0.0219878	Gm12915
ENSMUST00000117721.7	609.995	0.444626	0.135834	3.27331	0.00106295	0.0219878	Zkscan3
ENSMUST00000041852.7	125.841	0.551245	0.168453	3.27239	0.00106641	0.0220276	Pyroxd1
ENSMUST00000156343.1	160.124	0.446774	0.136526	3.27246	0.00106616	0.0220276	Actg1
ENSMUST00000079413.9	117.59	-0.5879	0.179756	-3.27055	0.0010734	0.0221597	Fkbp5
ENSMUST00000043938.6	395.528	-0.305927	0.0935733	-3.26938	0.00107782	0.0222387	Plcl2
ENSMUST00000048706.9	333.868	0.438462	0.134132	3.26888	0.00107974	0.022266	Orc3
ENSMUST00000051510.8	39.0639	2.31791	0.70945	3.2672	0.00108618	0.022374	Pigk
ENSMUST00000064174.11	336.642	0.400045	0.12244	3.26728	0.00108587	0.022374	Cemip
ENSMUST00000079195.5	370.095	-0.282795	0.0865874	-3.26601	0.00109074	0.0224555	Stox2
ENSMUST00000056919.7	156.842	-0.321848	0.0986041	-3.26404	0.00109836	0.0225999	Csnk2a2
ENSMUST00000133129.1	9.7225	4.76268	1.45997	3.26218	0.00110558	0.0227359	Ampd2
ENSMUST00000075856.10	789.283	-0.230601	0.070703	-3.26154	0.00110808	0.0227747	Kdm2a
ENSMUST00000149215.1	16.3147	0.91341	0.280089	3.26114	0.00110963	0.022794	Zfp286
ENSMUST00000050826.13	90.4319	-9.79344	3.00347	-3.26071	0.00111135	0.0228041	Tet1
ENSMUST00000165190.1	12.4155	5.1828	1.58945	3.26074	0.00111122	0.0228041	Tonsl
ENSMUST00000100827.4	516.521	0.829363	0.254437	3.2596	0.0011157	0.0228809	Abcc9
ENSMUST00000155802.7	228.031	-0.299916	0.0920344	-3.25874	0.00111908	0.0229375	Cd84
ENSMUST00000070918.12	63.4198	0.598271	0.183635	3.25794	0.00112223	0.0229893	Cmbl
ENSMUST00000131393.1	77.6835	-0.508356	0.156045	-3.25775	0.00112301	0.0229926	Notch1
ENSMUST00000026269.2	980.22	-0.486386	0.149367	-3.25631	0.00112872	0.0230969	Limd1
ENSMUST00000066070.6	765.398	0.687615	0.211195	3.25584	0.00113058	0.0231222	Eif3k
ENSMUST00000022660.13	2328.57	-0.363248	0.111583	-3.25542	0.00113226	0.0231438	Loxl2
ENSMUST00000190686.6	751.289	-0.531981	0.163469	-3.25433	0.00113661	0.02322	Srrm2
ENSMUST00000148204.7	23.7581	-2.83425	0.871193	-3.2533	0.00114073	0.0232659	Szrd1
ENSMUST00000055619.4	28.0505	-0.730314	0.224476	-3.25341	0.00114028	0.0232659	Hic1
ENSMUST00000021761.11	312.693	-0.507959	0.156127	-3.2535	0.00113992	0.0232659	Trim27
ENSMUST00000097896.2	35.8276	0.613661	0.188748	3.25122	0.00114912	0.0234241	4933427I04Rik
ENSMUST00000204484.2	158.732	-0.654201	0.20125	-3.25068	0.00115127	0.0234552	Zfp862-ps
ENSMUST00000090952.10	37.6667	-3.74647	1.15258	-3.25051	0.00115197	0.0234566	Fmnl2
ENSMUST00000129091.7	39.5639	1.03908	0.319738	3.24979	0.00115488	0.0235031	Ccdc167
ENSMUST00000125416.1	68.0044	-0.859852	0.264628	-3.24928	0.00115698	0.0235328	Col14a1
ENSMUST00000209913.1	79.45	0.745998	0.229626	3.24875	0.00115912	0.0235634	Fbxo25
ENSMUST00000160934.7	259.579	0.348084	0.107175	3.24779	0.00116303	0.0236073	Tnik
ENSMUST00000100540.9	10.4019	-2.32336	0.715321	-3.24799	0.00116223	0.0236073	Tsc22d4
ENSMUST00000173575.2	12.7578	-1.10345	0.339758	-3.24776	0.00116318	0.0236073	NA
ENSMUST00000110218.8	44.2656	-0.62892	0.193762	-3.24583	0.00117109	0.0237439	Spef1
ENSMUST00000141995.2	57.6418	-0.747382	0.230261	-3.24581	0.00117118	0.0237439	Mpdz
ENSMUST00000144447.7	132.923	0.525553	0.161964	3.24488	0.00117502	0.0238086	Sfi1
ENSMUST00000204798.2	16.6225	-1.15633	0.356375	-3.24469	0.00117578	0.0238111	Ezh2
ENSMUST00000018337.8	465.304	-0.59612	0.18377	-3.24384	0.0011793	0.0238695	Cdc73
ENSMUST00000024749.7	210.73	-0.439859	0.135611	-3.24353	0.00118058	0.0238824	Polh
ENSMUST00000122827.1	29.6312	-0.833741	0.257158	-3.24213	0.00118639	0.0239869	Col12a1
ENSMUST00000063508.13	32.2954	1.13915	0.351415	3.24161	0.00118858	0.0240181	Gria4
ENSMUST00000166682.8	19.026	-7.32927	2.26124	-3.24127	0.00119	0.0240338	Atxn2l
ENSMUST00000106505.7	11.7504	-1.0576	0.326479	-3.2394	0.00119783	0.0241738	Dph5
ENSMUST00000167014.2	83.5171	-0.716946	0.221328	-3.2393	0.00119823	0.0241738	Snap91
ENSMUST00000042055.9	442.311	-0.409083	0.126341	-3.23792	0.00120404	0.0242646	Ppp2r4
ENSMUST00000120186.1	9.3934	1.43199	0.442246	3.238	0.0012037	0.0242646	Gm12691
ENSMUST00000029635.13	1167.05	0.192186	0.0593652	3.23735	0.00120646	0.0243003	Gucy1b3
ENSMUST00000155446.1	102.114	0.638565	0.19737	3.23537	0.00121487	0.0244565	Vamp3
ENSMUST00000119128.7	56.586	1.03103	0.318708	3.23503	0.00121631	0.0244722	Pisd-ps1
ENSMUST00000117782.7	24.1871	-4.49073	1.38847	-3.23429	0.00121944	0.0245219	Adamtsl4
ENSMUST00000144153.7	16.4769	-5.24679	1.62249	-3.23379	0.0012216	0.0245521	Usp36
ENSMUST00000202959.1	238.755	0.461403	0.142785	3.23145	0.00123162	0.0247401	C030017G13Rik
ENSMUST00000037064.4	92.1744	-1.98828	0.61545	-3.23061	0.00123525	0.0247995	Slc25a37
ENSMUST00000037565.13	22.4636	7.59305	2.35068	3.23015	0.00123724	0.0248263	2610305D13Rik
ENSMUST00000186193.6	85.6947	0.478533	0.148254	3.22778	0.00124753	0.0250192	Pgm3
ENSMUST00000007814.8	289.896	-0.619519	0.192028	-3.22618	0.00125453	0.0251461	Khsrp
ENSMUST00000111453.1	14.743	-2.32835	0.721776	-3.22585	0.00125598	0.0251614	Snrnp35
ENSMUST00000048432.5	55.0789	-0.955672	0.296373	-3.22456	0.00126168	0.0252485	Prelp
ENSMUST00000197400.4	63.5752	0.668874	0.20743	3.22457	0.0012616	0.0252485	Slit2
ENSMUST00000046514.12	3247	0.300555	0.0932598	3.22277	0.00126956	0.025379	Eprs
ENSMUST00000143258.1	77.6261	-1.20246	0.373101	-3.22289	0.00126904	0.025379	Postn
ENSMUST00000134905.1	223.149	0.314484	0.0976288	3.22122	0.00127646	0.0254632	2007-03-01
ENSMUST00000159976.7	246.106	-0.933707	0.289855	-3.22129	0.00127616	0.0254632	Kirrel
ENSMUST00000196755.4	64.0611	0.693381	0.215255	3.22121	0.00127651	0.0254632	4930427A07Rik
ENSMUST00000023741.15	61.5094	9.54648	2.96324	3.22164	0.00127461	0.0254632	Kmt2d
ENSMUST00000117661.8	189.652	-0.892347	0.277087	-3.22045	0.00127988	0.0254899	Stim2
ENSMUST00000020497.13	572.132	0.281246	0.0873314	3.22045	0.0012799	0.0254899	Aldh1l2
ENSMUST00000168889.1	313.256	-0.420103	0.130448	-3.22047	0.00127981	0.0254899	Diaph3
ENSMUST00000025862.14	380.65	-0.904972	0.281026	-3.22024	0.00128083	0.0254946	Smarca2
ENSMUST00000044581.13	459.459	-0.288258	0.0895208	-3.22001	0.00128188	0.0255019	1700025G04Rik
ENSMUST00000098472.1	23.6723	1.09585	0.340393	3.21937	0.00128472	0.0255448	4930513N10Rik
ENSMUST00000190196.2	66.8367	-0.484215	0.150417	-3.21915	0.00128573	0.0255511	Prob1
ENSMUST00000210872.1	10.0698	1.26228	0.392637	3.21488	0.00130497	0.025906	Car11
ENSMUST00000063694.9	184.056	-0.536004	0.166722	-3.21496	0.00130462	0.025906	Klf13
ENSMUST00000163992.2	52.5626	0.56612	0.176137	3.21408	0.00130862	0.0259645	Slamf1
ENSMUST00000185788.6	18.652	-7.01274	2.18301	-3.21241	0.00131625	0.0261016	Abi2
ENSMUST00000035148.12	132.477	-0.453789	0.141268	-3.21226	0.00131693	0.0261016	Slco2a1
ENSMUST00000200191.1	684.206	-0.483027	0.150391	-3.2118	0.00131905	0.0261146	Wls
ENSMUST00000111639.7	17.4731	-1.38619	0.431633	-3.21151	0.0013204	0.0261146	Arntl2
ENSMUST00000023487.4	2462.44	-0.41495	0.129197	-3.21176	0.00131923	0.0261146	Arhgap31
ENSMUST00000181259.7	30.7486	-0.819066	0.255031	-3.21164	0.00131981	0.0261146	D330041H03Rik
ENSMUST00000027538.8	332.595	0.415761	0.129506	3.21037	0.00132566	0.0262047	Asb1
ENSMUST00000025663.6	2940.91	-0.307069	0.095696	-3.20879	0.00133294	0.0263347	Tmem2
ENSMUST00000189878.1	12.6879	1.37438	0.428374	3.20838	0.00133487	0.0263589	Khdrbs2
ENSMUST00000044895.11	496.573	-0.44518	0.138768	-3.20809	0.0013362	0.0263712	Rcan2
ENSMUST00000192716.1	29.3557	-0.876054	0.273103	-3.20778	0.00133765	0.0263859	Mpzl1
ENSMUST00000087622.5	87.6198	0.643886	0.200779	3.20694	0.00134157	0.0264491	Plekha5
ENSMUST00000060714.9	67.2641	-0.794518	0.247783	-3.2065	0.0013436	0.026475	Ubqln2
ENSMUST00000165721.7	598.954	-0.777969	0.242729	-3.20509	0.00135021	0.0265912	Csnk1a1
ENSMUST00000030636.10	2463.17	0.413951	0.129199	3.20398	0.00135541	0.0266716	Stmn1
ENSMUST00000093201.12	575.464	0.836552	0.261103	3.20392	0.00135572	0.0266716	Npm1
ENSMUST00000150498.7	102.317	0.433512	0.135397	3.2018	0.00136573	0.0268543	Nr2f1
ENSMUST00000085709.4	102.973	0.531756	0.166126	3.20093	0.00136987	0.0269215	Ppcdc
ENSMUST00000190277.1	10403.9	0.643829	0.20115	3.20073	0.00137078	0.0269251	Gm28437
ENSMUST00000024270.13	161.63	0.782689	0.244549	3.20055	0.00137167	0.0269284	Cdca3
ENSMUST00000038488.15	313.161	-0.9139	0.285629	-3.19961	0.00137616	0.0270023	Sidt2
ENSMUST00000069805.13	384.822	-0.537167	0.167982	-3.19777	0.00138496	0.0271464	Atp8b2
ENSMUST00000032946.9	458.455	-0.372645	0.116531	-3.19781	0.00138476	0.0271464	Rab6a
ENSMUST00000149656.1	22.4534	-0.821233	0.256855	-3.19726	0.00138738	0.0271795	Usp16
ENSMUST00000167962.1	481.544	-0.261327	0.0817426	-3.19695	0.00138891	0.0271952	Rab12
ENSMUST00000037879.6	411.515	-0.376126	0.117733	-3.19475	0.00139952	0.0273886	Heca
ENSMUST00000196040.1	14.0335	-1.04958	0.328633	-3.19378	0.00140422	0.027466	Gm43189
ENSMUST00000160545.1	17.0853	-0.924367	0.289494	-3.19304	0.00140781	0.0275218	E430024P14Rik
ENSMUST00000127723.7	68.3204	-0.715761	0.224195	-3.19258	0.00141009	0.0275519	Leng8
ENSMUST00000159063.7	23.7436	-1.17167	0.367273	-3.19017	0.00142187	0.0277675	Nfya
ENSMUST00000143022.1	6.77619	-4.66953	1.46428	-3.18896	0.00142786	0.0278698	Atp5f1
ENSMUST00000145803.7	13.1362	-2.31249	0.725283	-3.18839	0.00143065	0.0279097	Ftx
ENSMUST00000198251.1	14.654	1.22077	0.382941	3.18788	0.0014332	0.0279449	Gm43713
ENSMUST00000039913.8	99.3896	0.525088	0.164787	3.18646	0.00144027	0.028068	Tigar
ENSMUST00000111518.2	134.638	-0.373258	0.117166	-3.18572	0.00144392	0.028095	Fmo1
ENSMUST00000045694.13	23.1057	1.25185	0.392944	3.18583	0.0014434	0.028095	Mettl18
ENSMUST00000098782.3	67.0401	-0.545731	0.171305	-3.18573	0.0014439	0.028095	Layn
ENSMUST00000034564.1	46.4771	-0.628916	0.197452	-3.18516	0.00144674	0.0281351	2310030G06Rik
ENSMUST00000035471.7	65.913	0.581155	0.182473	3.18488	0.00144812	0.0281471	Lama1
ENSMUST00000045140.4	306.495	0.283966	0.0891934	3.18371	0.00145399	0.0282466	Tcaf1
ENSMUST00000120591.7	29.3381	1.35932	0.427034	3.18315	0.00145681	0.0282719	Pisd
ENSMUST00000035735.9	22.9495	-0.953782	0.299631	-3.18319	0.0014566	0.0282719	Ndufa4l2
ENSMUST00000175866.7	47.3193	1.00314	0.315199	3.18256	0.0014598	0.0283151	Zfhx4
ENSMUST00000014990.12	29.4528	-1.11409	0.350154	-3.18173	0.001464	0.0283819	Tppp3
ENSMUST00000044857.3	146.993	-0.682807	0.214641	-3.18116	0.00146688	0.0284228	Trappc5
ENSMUST00000151187.7	59.5952	-0.572455	0.179976	-3.18073	0.00146904	0.0284393	Tmem209
ENSMUST00000118374.7	181.047	0.524873	0.165019	3.18069	0.00146926	0.0284393	R3hcc1
ENSMUST00000204272.2	6.63806	-4.52281	1.42253	-3.1794	0.00147578	0.0285367	Wbp11
ENSMUST00000049308.8	149.596	-0.581576	0.18292	-3.1794	0.00147582	0.0285367	Itpr3
ENSMUST00000077257.11	218.944	-0.491973	0.154762	-3.17891	0.0014783	0.0285698	Rxra
ENSMUST00000202622.3	444.415	-0.339309	0.106744	-3.17871	0.0014793	0.0285743	Eif4h
ENSMUST00000136667.1	20.3061	-7.03518	2.21335	-3.17852	0.00148027	0.028578	Ywhah
ENSMUST00000104526.1	1479.96	0.712169	0.224073	3.17829	0.00148148	0.0285866	Snord17
ENSMUST00000169095.5	1259.83	-0.694446	0.21855	-3.17751	0.00148546	0.0286487	Cd36
ENSMUST00000077925.5	783.721	-0.613717	0.193169	-3.1771	0.00148754	0.0286739	Unc5b
ENSMUST00000187028.6	105.118	-0.556913	0.175336	-3.17627	0.00149182	0.0287415	Zfp383
ENSMUST00000111390.7	91.7055	-0.793674	0.249955	-3.17527	0.00149699	0.0288113	Scarb1
ENSMUST00000098414.4	131.82	0.521315	0.16418	3.17527	0.00149698	0.0288113	Svip
ENSMUST00000078849.10	332.081	0.744868	0.234634	3.17459	0.00150049	0.0288488	Gpc6
ENSMUST00000100026.9	1833.96	-0.276366	0.087055	-3.17461	0.00150037	0.0288488	Ccdc50
ENSMUST00000098539.6	109.78	0.52856	0.166512	3.17431	0.00150192	0.0288614	Odf2l
ENSMUST00000081851.3	25.0652	1.28525	0.404923	3.17405	0.00150326	0.0288723	Tmeff2
ENSMUST00000106429.5	396.058	0.491504	0.154873	3.1736	0.00150561	0.0288727	1810037I17Rik
ENSMUST00000042352.10	26.5265	0.814497	0.256636	3.17375	0.00150485	0.0288727	Zmat4
ENSMUST00000150782.1	375.556	0.537671	0.169419	3.17361	0.00150556	0.0288727	Atcayos
ENSMUST00000029380.13	912.624	-0.303602	0.0956993	-3.17245	0.00151158	0.0289722	Wwtr1
ENSMUST00000061071.12	29.8715	-0.993139	0.31313	-3.17165	0.00151573	0.0290366	Plppr4
ENSMUST00000166004.1	34.7886	-0.726861	0.229185	-3.17151	0.0015165	0.0290366	Mast3
ENSMUST00000096114.11	71.993	0.495839	0.156374	3.17085	0.00151996	0.0290879	Rnls
ENSMUST00000091233.6	244.759	-0.880317	0.277648	-3.17062	0.00152114	0.0290955	Adamtsl2
ENSMUST00000200675.1	35.3294	-0.604909	0.190838	-3.16976	0.00152567	0.0291672	Gm43506
ENSMUST00000143329.1	9.70088	1.22415	0.386274	3.16913	0.00152894	0.0291846	Pak7
ENSMUST00000032820.13	930.886	0.324848	0.102503	3.16917	0.00152873	0.0291846	Zscan26
ENSMUST00000184181.1	49.4494	0.56455	0.178131	3.1693	0.00152804	0.0291846	1500015A07Rik
ENSMUST00000047431.10	217.008	-0.362022	0.114243	-3.16889	0.00153021	0.029194	AU040320
ENSMUST00000142089.1	8.04062	-2.41375	0.761907	-3.16804	0.00153471	0.0292648	Smim5
ENSMUST00000105839.7	66.4936	-0.871651	0.275162	-3.16778	0.00153609	0.0292761	Usp48
ENSMUST00000120800.1	14.3383	-1.17105	0.369785	-3.16685	0.00154101	0.0293465	Gm14300
ENSMUST00000025142.11	475.943	0.378028	0.119373	3.16678	0.00154136	0.0293465	Esco1
ENSMUST00000051163.2	19.8401	0.856447	0.270473	3.16648	0.00154296	0.029362	Pcdhb8
ENSMUST00000151477.7	29.6019	-1.06095	0.335111	-3.16597	0.00154564	0.0293937	Tnrc18
ENSMUST00000048417.12	61.9094	9.50954	3.00377	3.16587	0.00154621	0.0293937	Dync2h1
ENSMUST00000138679.1	750.024	-2.72917	0.862283	-3.16506	0.00155053	0.0294608	Gm4735
ENSMUST00000173981.7	7.92286	-3.12629	0.987807	-3.16488	0.00155146	0.0294635	Selenbp2
ENSMUST00000145547.7	18.8813	2.03585	0.644165	3.16045	0.00157523	0.0298845	Ankrd16
ENSMUST00000099683.1	235.446	1.30268	0.412171	3.16053	0.00157482	0.0298845	Gm10800
ENSMUST00000088970.5	251.332	0.240334	0.0760488	3.16026	0.00157626	0.0298887	Lrch1
ENSMUST00000143626.1	12.4859	1.3563	0.429321	3.15918	0.00158216	0.02997	Gabrb2
ENSMUST00000054636.6	242.974	0.287234	0.0909182	3.15925	0.00158175	0.02997	Bag5
ENSMUST00000168907.7	52.3834	-7.56714	2.39611	-3.15809	0.00158808	0.0300556	Sgk3
ENSMUST00000027528.6	19.8538	-0.933	0.295436	-3.15805	0.00158829	0.0300556	Mlph
ENSMUST00000106798.6	112.436	0.333949	0.105811	3.15609	0.00159898	0.0301704	Usp24
ENSMUST00000051676.6	10.9902	-1.98383	0.628576	-3.15607	0.00159909	0.0301704	Fam46b
ENSMUST00000191860.1	70.3838	0.460589	0.145912	3.15663	0.00159604	0.0301704	Thap6
ENSMUST00000163030.8	31.499	-1.00645	0.318861	-3.1564	0.0015973	0.0301704	Setd1b
ENSMUST00000034093.14	262.446	-0.349598	0.110771	-3.15605	0.00159922	0.0301704	Eif2ak3
ENSMUST00000107397.1	58.1803	9.3551	2.96372	3.15654	0.00159654	0.0301704	Nt5c3b
ENSMUST00000029625.7	291.376	0.479611	0.152025	3.15481	0.00160603	0.0302835	Sfrp2
ENSMUST00000068259.9	1117.95	-0.263141	0.0834208	-3.15438	0.00160839	0.0303126	Klhdc10
ENSMUST00000157031.1	56.5503	-0.611837	0.193979	-3.15414	0.00160974	0.0303158	Ap4m1
ENSMUST00000040430.7	279.028	-0.316171	0.100246	-3.15394	0.00161083	0.0303158	Vat1
ENSMUST00000164826.7	21.3128	-1.08914	0.345331	-3.15391	0.001611	0.0303158	Card10
ENSMUST00000201191.1	45.6348	-0.526573	0.166972	-3.15366	0.00161239	0.0303265	Ociad1
ENSMUST00000036719.11	78.8668	-1.04538	0.331556	-3.15294	0.00161636	0.0303642	Prex1
ENSMUST00000106138.7	70.7985	0.940254	0.298223	3.15285	0.00161684	0.0303642	Prkacb
ENSMUST00000030747.10	186.92	-0.353204	0.112019	-3.15307	0.00161564	0.0303642	Casp9
ENSMUST00000135345.1	76.5291	-0.867237	0.27511	-3.15232	0.00161977	0.030404	Rpl21
ENSMUST00000127630.7	40.2029	-0.667432	0.21175	-3.15199	0.00162164	0.0304237	Ccdc34
ENSMUST00000198147.4	101.345	0.48104	0.152743	3.14934	0.00163638	0.0306694	Tbck
ENSMUST00000111726.9	144.071	-1.71484	0.544485	-3.14947	0.00163565	0.0306694	Lyrm5
ENSMUST00000139089.1	11.4642	-1.33352	0.423483	-3.14893	0.00163867	0.0306826	Sspnos
ENSMUST00000124526.1	14.143	-1.28561	0.40827	-3.14892	0.00163874	0.0306826	Ahnak2
ENSMUST00000036682.7	160.222	-0.468626	0.148828	-3.14877	0.00163958	0.0306831	Pxk
ENSMUST00000149243.7	103.545	-0.690543	0.219398	-3.14745	0.00164703	0.0307967	Mrpl3
ENSMUST00000135574.7	44.0828	0.865145	0.274876	3.1474	0.00164731	0.0307967	Adarb2
ENSMUST00000007980.6	502.265	-0.601798	0.191273	-3.14628	0.0016536	0.0308987	Hnrnpa0
ENSMUST00000154721.7	14.3931	-5.54299	1.76353	-3.14312	0.00167155	0.0312184	Rbl1
ENSMUST00000121979.7	28.317	-7.17058	2.28185	-3.14244	0.00167548	0.0312762	Cep135
ENSMUST00000112685.7	89.8131	-0.617232	0.196488	-3.14132	0.00168187	0.0313798	Fgd1
ENSMUST00000129589.7	789.846	0.309525	0.0985382	3.14117	0.00168274	0.0313803	Azin1
ENSMUST00000123174.1	158.115	0.551827	0.175763	3.13961	0.00169172	0.0315319	Atrx
ENSMUST00000173404.1	15.2469	-1.30961	0.417322	-3.13812	0.00170034	0.0316767	Kcnq5
ENSMUST00000178136.7	14.9359	-4.15429	1.32395	-3.1378	0.00170219	0.0316953	Abcc3
[truncated: 35,223 more rows]
