# Supplementary material for: Quantitative trait and transcriptome analysis of genetic complexity underpinning cardiac interatrial septation in mice using an advanced intercross line
Source: eLife. 2023 Jun 5;12:e83606. doi: 10.7554/eLife.83606 (PMC10284603; doi:10.7554/eLife.83606)
Supplement: Supplementary file 6. [file elife-83606-supp6.xlsx]

## Sheet: E12.5
Supplementary File 6: differentially expressed genes between the 129T2/SvEms and QSi5 strains at each time point.
Gene	baseMean	log2FoldChange	lfcSE	stat	pvalue	padj
Gm21887	3564.31	-3.32853	0.138703	-23.9975	2.95228e-127	3.70187e-123
Erdr1	7601.25	-3.28569	0.142584	-23.0439	1.69211e-117	1.06087e-113
Snx14	251.527	4.87653	0.24979	19.5225	7.07158e-85	2.95568e-81
Gm3173	1377.11	3.22347	0.167195	19.2797	7.94992e-83	2.4921e-79
Lmntd1	287.614	4.34261	0.232248	18.6982	5.12158e-78	1.28439e-74
Gm2237	1559.11	2.97484	0.176376	16.8665	7.94175e-64	1.65969e-60
Gm3020	857.543	2.83265	0.18328	15.4553	6.94877e-54	1.24472e-50
Gm8730	1022.14	3.01746	0.196567	15.3508	3.49789e-53	5.4825e-50
Zfp951	394.915	-3.01421	0.202239	-14.9042	3.09605e-50	4.31348e-47
Gm3164	606.829	2.69456	0.182233	14.7863	1.79487e-49	2.25058e-46
Gm3194	1028.27	2.57349	0.175854	14.6343	1.69722e-48	1.93468e-45
Gm3383	1091.4	2.45933	0.168702	14.578	3.87718e-48	4.05133e-45
Gm3252	1182.98	2.57936	0.177241	14.5528	5.60204e-48	5.40339e-45
Gm2974	1447.39	2.35178	0.161732	14.5412	6.63841e-48	5.94565e-45
Gm3002	1164.79	2.28332	0.157335	14.5125	1.00969e-47	8.44035e-45
Gm3558	1522.81	2.35286	0.163176	14.4191	3.92205e-47	3.07366e-44
Itgb3bp	115.984	3.78703	0.26638	14.2166	7.22461e-46	5.32879e-43
2610042L04Rik	669.269	2.53508	0.178593	14.1947	9.87586e-46	6.87963e-43
Gm3500	1420.83	2.41454	0.171946	14.0425	8.5684e-45	5.65469e-42
Gm10406	1213.81	2.48717	0.181297	13.7187	7.8412e-43	4.91604e-40
Gm3667	1370.19	2.46215	0.180957	13.6063	3.6745e-42	2.19403e-39
Gm3739	938.565	2.37321	0.177481	13.3717	8.85533e-41	5.04714e-38
Gm3468	679.661	2.34222	0.178517	13.1205	2.51415e-39	1.37065e-36
Gm3005	971.067	2.13915	0.163175	13.1096	2.90257e-39	1.51647e-36
Agrp	96.9913	3.53064	0.269965	13.0781	4.39165e-39	2.20267e-36
Gm2897	1031.98	2.13774	0.165019	12.9545	2.21495e-38	1.0682e-35
Gm3411	1587.87	2.00736	0.159156	12.6125	1.80161e-36	8.36683e-34
Gm3264	753.688	2.15904	0.171586	12.5828	2.6261e-36	1.17602e-33
Wnk3	88.0248	3.40989	0.2714	12.5641	3.32699e-36	1.43852e-33
Gm10409	437.803	2.55222	0.203895	12.5174	6.00008e-36	2.50783e-33
Glrb	460.033	2.20052	0.176876	12.4411	1.56385e-35	6.32551e-33
Gm3248	230.452	2.65132	0.215424	12.3075	8.25618e-35	3.23513e-32
Gm10036	557.176	2.12227	0.174308	12.1754	4.20389e-34	1.59735e-31
Gm8281	1157.3	1.93016	0.159961	12.0664	1.58912e-33	5.8606e-31
Amph	245.971	-2.57816	0.218247	-11.813	3.34266e-32	1.19753e-29
4930578G10Rik	75.984	3.18959	0.274063	11.6382	2.63556e-31	9.1798e-29
Gm2956	804.912	1.96619	0.171339	11.4755	1.75226e-30	5.93827e-28
Gm3488	371.974	2.20126	0.192593	11.4296	2.97543e-30	9.81815e-28
Gm5796	1139.09	1.85491	0.165361	11.2173	3.35233e-29	1.07782e-26
Gm3696	1425.46	1.76425	0.161776	10.9055	1.0848e-27	3.40058e-25
Ctsk	102.932	2.75423	0.257361	10.7018	9.97982e-27	3.05212e-24
Gm5786	340.295	2.0818	0.19581	10.6317	2.12116e-26	6.33267e-24
Gm8108	864.938	1.80643	0.171944	10.5059	8.11081e-26	2.36515e-23
Unc13c	1648.16	-1.60817	0.153393	-10.484	1.02346e-25	2.91662e-23
Gm8237	220.903	2.34604	0.226529	10.3564	3.91245e-25	1.09018e-22
Gm14403	617.393	-1.85509	0.179289	-10.3469	4.32193e-25	1.1781e-22
Rpl26	3268.14	1.48365	0.144698	10.2534	1.14238e-24	3.04773e-22
Gm5611	115.348	-2.59597	0.259452	-10.0056	1.44061e-23	3.7633e-21
Stag3	154.864	2.3359	0.236716	9.86793	5.73368e-23	1.46724e-20
Il11ra1	50.5298	2.52487	0.279084	9.04698	1.46981e-19	3.68599e-17
Sel1l3	165.61	-2.07026	0.231006	-8.96197	3.18936e-19	7.84146e-17
Rad51	60.267	-2.46284	0.27911	-8.8239	1.10537e-18	2.66543e-16
E030030I06Rik	158.177	-1.98254	0.232567	-8.5246	1.53337e-17	3.62772e-15
Efcab11	852.093	-1.44185	0.170283	-8.46736	2.51021e-17	5.82879e-15
Rnf17	293.272	1.6377	0.197553	8.28992	1.13323e-16	2.58355e-14
Gm14410	2521.71	-1.16626	0.142148	-8.20457	2.31415e-16	5.18163e-14
Dynlt1a	963.689	1.38189	0.16985	8.13599	4.08585e-16	8.98816e-14
Tpm3-rs7	687.317	-1.37724	0.170176	-8.09305	5.81889e-16	1.25798e-13
Hsd3b6	295.732	1.78981	0.22411	7.98629	1.39066e-15	2.9555e-13
Gm21092	8957.93	1.01122	0.127314	7.94276	1.97727e-15	4.06938e-13
Gm3629	208.817	1.73643	0.218622	7.94261	1.97968e-15	4.06938e-13
Postn	19863.4	-0.980804	0.124909	-7.85212	4.09048e-15	8.27267e-13
2610305D13Rik	85.4128	2.05959	0.263189	7.82552	5.05549e-15	1.0062e-12
Gm3526	69.4212	2.09889	0.268608	7.81396	5.54203e-15	1.0858e-12
Limch1	4668.78	-1.19296	0.152878	-7.80337	6.02768e-15	1.16279e-12
Cadps	703.249	-1.38315	0.179103	-7.72267	1.13917e-14	2.16426e-12
Dock2	39.0261	-2.1411	0.279092	-7.67169	1.69749e-14	3.17684e-12
Ccrn4l	270.187	-1.51894	0.199766	-7.60356	2.88094e-14	5.31236e-12
Dnah6	145.659	1.69898	0.228453	7.43691	1.03066e-13	1.87296e-11
Gm6483	2796.25	0.986139	0.133295	7.39817	1.38079e-13	2.47338e-11
Slc2a12	50.5217	2.04768	0.278078	7.3637	1.78881e-13	3.15914e-11
Srpr	35.9327	-2.0452	0.27873	-7.33759	2.17477e-13	3.78743e-11
Chrm3	507.481	-1.26706	0.173892	-7.28648	3.18161e-13	5.46496e-11
Zfp536	619.261	-1.47922	0.206963	-7.14727	8.85179e-13	1.4999e-10
Lrrc8d	513.366	-1.24916	0.174832	-7.14494	9.00341e-13	1.50525e-10
4930447C04Rik	149.777	1.63669	0.230109	7.1127	1.13794e-12	1.87746e-10
Ifi44	49.7006	1.97107	0.277735	7.09696	1.27535e-12	2.07684e-10
Gm13157	180.083	1.51181	0.215811	7.00525	2.46547e-12	3.9634e-10
Ank2	3584.62	-0.951709	0.136708	-6.96163	3.36365e-12	5.33884e-10
Dchs2	219.357	-1.42663	0.207005	-6.89178	5.50974e-12	8.63583e-10
Sugct	319.36	-1.30513	0.189439	-6.88946	5.60043e-12	8.6696e-10
Gm8113	1408.94	1.17695	0.170962	6.88425	5.80912e-12	8.883e-10
Synpr	81.0903	-1.78914	0.26032	-6.87284	6.29354e-12	1e-09
Gm3239	212.429	1.45775	0.213366	6.83217	8.36375e-12	1.24849e-09
Capg	53.2856	1.87681	0.275202	6.81976	9.11945e-12	1.34528e-09
Apex2	681.619	-1.47239	0.215987	-6.81703	9.29412e-12	1.3551e-09
Rp9	529.208	-1.14013	0.167894	-6.79073	1.11569e-11	1.60801e-09
Nipal4	266.975	1.31858	0.195202	6.75494	1.42891e-11	2e-09
Apba1	719.874	-1.18008	0.174813	-6.75053	1.4731e-11	2.07542e-09
Mpzl1	2069.67	-0.985884	0.147179	-6.69856	2.10487e-11	2.93255e-09
Hs3st4	879.588	1.06572	0.159205	6.69399	2.17168e-11	3e-09
Cep112	2010.51	-1.08306	0.163202	-6.63632	3.2162e-11	4.38348e-09
Gm3453	29.3608	1.81854	0.277285	6.55836	5.44011e-11	7.33479e-09
Slc6a17	233.298	-1.3604	0.207808	-6.54643	5.89269e-11	7.86048e-09
Pdia5	898.008	-1.0485	0.162084	-6.46887	9.87391e-11	1.3e-08
Gm3095	178.096	1.45326	0.225887	6.43357	1.24644e-10	1.62803e-08
Dydc1	29.7868	1.78635	0.277748	6.43156	1.26298e-10	1.63264e-08
Tmeff2	241.224	1.39189	0.216496	6.42917	1.28299e-10	1.64158e-08
Hfm1	148.771	1.4544	0.226422	6.42339	1.33268e-10	1.68793e-08
Terf2ip	29.6844	1.76288	0.274607	6.41963	1.36607e-10	1.71292e-08
Dynlt1c	1739.34	0.966363	0.153847	6.28131	3.35735e-10	4.1681e-08
Gm13305	243.955	-1.27978	0.204134	-6.26931	3.62641e-10	4.458e-08
Rps2	3478.47	0.909609	0.146577	6.20569	5.44584e-10	6.62965e-08
Greb1l	1649.98	-0.983622	0.160269	-6.13731	8.39295e-10	1.01192e-07
Fgf14	2953.19	0.808536	0.131982	6.12611	9.00547e-10	1.07542e-07
Rps18-ps3	220.124	-1.31654	0.215813	-6.10041	1.05799e-09	1.25153e-07
Ubc	3649.97	-0.801455	0.131594	-6.09037	1.1265e-09	1.32e-07
Myl9	12068.6	0.911928	0.149929	6.08241	1.18391e-09	1.37455e-07
D5Ertd579e	4290.14	0.800722	0.131703	6.07976	1.20362e-09	1.37737e-07
Fndc1	239.388	-1.2608	0.207398	-6.07914	1.20831e-09	1.37737e-07
Ifit2	119.26	1.47486	0.243091	6.06713	1.3022e-09	1.47101e-07
Cdc26	26.8858	1.65126	0.272452	6.06072	1.35515e-09	1.51717e-07
Piezo2	2130.61	-0.915227	0.152004	-6.02106	1.73283e-09	1.92283e-07
Slfn9	590.763	-1.03126	0.171436	-6.01542	1.79415e-09	1.97341e-07
Dnah8	312.221	-1.16836	0.194511	-6.00666	1.89384e-09	2.06495e-07
H2-D1	156.09	-1.33579	0.223788	-5.96898	2.38746e-09	2.58072e-07
Boc	1175.22	-0.995151	0.166916	-5.96199	2.49181e-09	2.67e-07
Srp9	449.151	1.11616	0.187817	5.94278	2.80235e-09	2.97785e-07
Atp5g1	1276.31	0.929787	0.156548	5.9393	2.86247e-09	2.99105e-07
Reps2	28.6418	-1.62332	0.273287	-5.93998	2.85057e-09	2.99105e-07
Slc25a31	76.9959	1.54355	0.260331	5.92917	3e-09	3.1552e-07
Efemp1	487.238	-1.0397	0.176917	-5.87677	4.18349e-09	4.3e-07
Gm14443	40.3965	1.62887	0.278773	5.843	5.12696e-09	5.18443e-07
Nrg2	353.672	-1.14021	0.195134	-5.84324	5.11965e-09	5.18443e-07
Enox1	1005.78	-1.08503	0.185959	-5.83476	5.38684e-09	5.40365e-07
Eno2	194.346	-1.23781	0.212858	-5.81519	6.05664e-09	6.02731e-07
Srp54a	1605.6	0.876237	0.150724	5.81351	6.11767e-09	6.04e-07
Abca5	765.55	0.905966	0.156683	5.78215	7.37514e-09	7.22475e-07
Rspo2	255.043	-1.16077	0.200871	-5.77868	7.52877e-09	7.31808e-07
Gm8225	160.404	1.30811	0.226577	5.77336	7.77079e-09	7.49523e-07
Sh3pxd2b	1235.83	-1.0012	0.174303	-5.74401	9.24581e-09	8.85e-07
Fstl4	3919.83	-1.03421	0.181015	-5.71339	1.10745e-08	1.04409e-06
Tmem241	831.058	-0.927951	0.162385	-5.71451	1.1e-08	1.04409e-06
Prss35	1637.53	0.833734	0.146287	5.69929	1.2e-08	1.12579e-06
Gm10340	291.83	1.13161	0.199451	5.67365	1.4e-08	1.29838e-06
Fabp12	45.2593	1.56929	0.277245	5.6603	1.51107e-08	1.39318e-06
Srp54b	5052.61	0.783651	0.138732	5.64866	1.61704e-08	1.48e-06
Mtx1	21.1111	1.51469	0.26966	5.61704	1.94259e-08	1.76508e-06
Mbp	177.474	-1.20842	0.216197	-5.58942	2.27833e-08	2.05525e-06
Epha4	3955.55	0.72148	0.129483	5.572	2.5183e-08	2.2555e-06
Dscaml1	120.283	-1.41996	0.255	-5.56848	2.56978e-08	2.28529e-06
Gsap	277.237	1.07989	0.195119	5.53451	3.121e-08	2.73666e-06
Thnsl1	191.018	1.21039	0.218661	5.53546	3.1e-08	2.73666e-06
Rxfp1	1555.79	-0.785398	0.141963	-5.53242	3.15848e-08	2.75029e-06
Gm3512	286.511	1.19539	0.216263	5.52747	3.24875e-08	2.80939e-06
Fn3krp	209.785	1.14671	0.207842	5.51723	3.44391e-08	2.95775e-06
Pla2g4c	22.1222	1.47201	0.268209	5.4883	4.05825e-08	3.46166e-06
Ntf3	494.159	-1.00318	0.18307	-5.47976	4.25912e-08	3.58793e-06
Rasef	162.333	1.21264	0.221301	5.47957	4.26351e-08	3.58793e-06
Agtr1a	138.321	-1.29099	0.236648	-5.4553	4.88912e-08	4.087e-06
Antxr1	940.425	-1.01753	0.186913	-5.44387	5.21354e-08	4.30693e-06
Dynlt1f	1502.08	0.861614	0.15828	5.44362	5.22094e-08	4.30693e-06
Usp16	1489.6	-0.800267	0.147472	-5.42656	5.74507e-08	4.70833e-06
Morn2	44.2235	1.48788	0.276822	5.37484	7.66501e-08	6.241e-06
Slc16a2	918.888	-0.873091	0.162622	-5.36885	7.92402e-08	6.372e-06
Tmem51	291.843	-1.14955	0.214117	-5.36877	7.92754e-08	6.372e-06
Lrp8	22.3689	-1.44126	0.269255	-5.35277	8.66166e-08	6.91775e-06
Lsamp	4281.09	0.764995	0.14333	5.33728	9.43517e-08	7.48782e-06
Grid1	1097.01	-1.02237	0.191943	-5.3264	1.00181e-07	7.90041e-06
Zbtb8b	98.4865	-1.31674	0.248745	-5.29356	1.2e-07	9.40117e-06
Zfp40	368.505	-0.949959	0.180133	-5.27365	1.33734e-07	1.04154e-05
Slc17a7	90.1954	1.32597	0.251821	5.26553	1.39782e-07	1.08193e-05
Gm6576	124.573	1.25726	0.239177	5.25661	1.46737e-07	1.12879e-05
Snrnp35	235.608	-1.05244	0.201245	-5.22966	1.69826e-07	1.29845e-05
Mdga1	219.753	-1.1205	0.215308	-5.20417	1.94866e-07	1.48086e-05
Pmepa1	728.822	-1.0952	0.21053	-5.20211	1.97e-07	1.48835e-05
Lrrtm4	500.724	0.883896	0.170593	5.18132	2.20321e-07	1.65425e-05
Dab2	1467.09	-0.805628	0.155999	-5.1643	2.41341e-07	1.8005e-05
Pknox2	1469.21	-0.957919	0.185526	-5.16327	2.4267e-07	1.8005e-05
Gm10338	20.2951	1.38827	0.269222	5.1566	2.51474e-07	1.85485e-05
Clstn2	1375.91	0.915982	0.177908	5.14863	2.6239e-07	1.92404e-05
Tcf7l2	3375.07	-0.912655	0.177416	-5.14416	2.68727e-07	1.95905e-05
Gsg1l	683.656	0.953987	0.185772	5.13526	2.81761e-07	2.0422e-05
Agap1	4943.1	-0.82723	0.161557	-5.12035	3.05e-07	2.19769e-05
Mtss1	5407.13	-0.842367	0.16473	-5.11362	3.16e-07	2.26449e-05
Gm3424	30.5815	1.42497	0.27898	5.10776	3.26e-07	2.32251e-05
Pgbd5	189.139	1.08916	0.213473	5.10209	3.35915e-07	2.37968e-05
Ptpn14	1637.38	-0.891601	0.174896	-5.0979	3.43449e-07	2.4097e-05
Tmem181a	1003.64	0.752825	0.147682	5.09759	3.44e-07	2.4097e-05
Spred2	1279.49	-0.920599	0.181016	-5.08573	3.66224e-07	2.55116e-05
Fggy	828.697	-0.801236	0.157811	-5.07719	3.83053e-07	2.65365e-05
Arntl2	157.928	-1.13016	0.222932	-5.06952	3.98829e-07	2.74776e-05
Prdm16	659.934	-1.0894	0.21516	-5.0632	4.12276e-07	2.82488e-05
Lgals9	156.917	-1.12212	0.224327	-5.00216	5.66926e-07	3.83568e-05
Thoc1	1505.34	0.722032	0.144342	5.00223	5.6672e-07	3.83568e-05
Zfp960	434.317	0.897458	0.179439	5.00146	5.69e-07	3.83568e-05
Ddx6	4171.71	-0.677644	0.135629	-4.99631	5.84362e-07	3.91835e-05
Usp14	2315.61	0.702059	0.14056	4.99473	5.89168e-07	3.92956e-05
Gm13306	100.563	-1.24281	0.248903	-4.99315	5.94e-07	3.94096e-05
Epb4.1l3	3422.4	-0.694703	0.140006	-4.96197	6.97831e-07	4.60531e-05
Adamtsl2	657.023	-0.873441	0.176499	-4.94869	7.47136e-07	4.87025e-05
Tmem132c	1374.27	-0.837186	0.169195	-4.94804	7.49628e-07	4.87025e-05
mt-Nd3	4971.06	0.679159	0.137253	4.94823	7.48931e-07	4.87025e-05
Mkx	67.2467	1.29693	0.263481	4.9223	8.55342e-07	5.52842e-05
Gdpd3	61.5682	-1.32883	0.270221	-4.91757	8.76233e-07	5.62749e-05
Zfp609	2543.76	-0.832865	0.169391	-4.91681	8.79645e-07	5.62749e-05
Khdrbs2	383.706	0.881018	0.179256	4.91486	8.88444e-07	5.65492e-05
Stk31	33.2483	1.36675	0.279246	4.89443	9.85887e-07	6.24345e-05
Cdk6	2168.84	-0.794937	0.162942	-4.87864	1.06817e-06	6.73057e-05
Tfrc	2612.21	0.75421	0.154919	4.86841	1.125e-06	7.05324e-05
Gm10128	103.347	1.2162	0.250396	4.85711	1.19108e-06	7.43035e-05
Shb	1317.73	-0.877554	0.18072	-4.85587	1.19856e-06	7.44e-05
Tmc7	272.806	0.930608	0.192719	4.82884	1.37334e-06	8.4829e-05
Snx9	1323.86	-0.769122	0.159757	-4.81433	1.47694e-06	9.07811e-05
Zfp423	1460.61	-0.940239	0.195389	-4.81214	1.49321e-06	9.13334e-05
Ankrd52	214.594	-1.14294	0.237734	-4.80766	1.5271e-06	9.29529e-05
Lancl3	147.482	1.08274	0.225819	4.7947	1.62919e-06	9.8688e-05
Eif3k	965.352	0.729745	0.152276	4.79224	1.64931e-06	9.94263e-05
Ccbe1	664.96	-0.780795	0.163021	-4.78954	1.67164e-06	9.98127e-05
Pcsk6	218.826	-1.11174	0.23208	-4.79033	1.66509e-06	9.98127e-05
Acta2	6369.88	0.729847	0.152556	4.78413	1.71732e-06	0.000102055
Iigp1	157.616	-1.06331	0.222575	-4.77732	1.77649e-06	0.000105073
Eif1	916.096	-0.792546	0.166127	-4.77072	1.83572e-06	0.000107561
Rapgef4	342.359	-0.946797	0.19844	-4.7712	1.83131e-06	0.000107561
Arhgap17	1094.19	-0.883511	0.185302	-4.76795	1.86108e-06	0.00010854
Slc37a1	124.99	-1.12283	0.235558	-4.76667	1.873e-06	0.000108728
Dhrs7	335.369	0.915832	0.192493	4.75775	1.95761e-06	0.000113117
Cd200r3	22.6422	1.29903	0.273339	4.75246	2.00961e-06	0.000115589
Dlg2	2904.04	-0.799344	0.168451	-4.74526	2.08237e-06	0.000119227
Cntfr	326.296	-1.12746	0.237996	-4.73733	2.16549e-06	0.000123423
Zfhx3	1295.07	-0.934336	0.19734	-4.73466	2.19421e-06	0.000124494
Gm3298	54.0039	1.28353	0.271218	4.73246	2.2182e-06	0.000124973
Spata1	260.983	-0.956385	0.202108	-4.73205	2.22258e-06	0.000124973
Ly6e	164.058	1.04287	0.220596	4.7275	2.273e-06	0.000127236
Cep128	1183.32	-0.747424	0.158661	-4.71081	2.46729e-06	0.0001375
Ptgis	438.923	-0.876456	0.186177	-4.70766	2.50578e-06	0.000139026
Cmtm8	102.416	-1.18631	0.252223	-4.70343	2.55827e-06	0.00014086
Hmga2	1706.4	-0.784272	0.166753	-4.70319	2.5613e-06	0.00014086
Cdh20	488.865	0.877337	0.186742	4.69811	2.62575e-06	0.000143774
Ankrd6	339.372	-0.912933	0.194415	-4.6958	2.65568e-06	0.000144781
Cmip	1623.18	-0.930906	0.198329	-4.69376	2.68233e-06	0.000145601
Lgi2	64.9839	1.24225	0.26512	4.68559	2.79153e-06	0.000150875
Olfr1033	15.6076	1.20457	0.258658	4.65699	3.20864e-06	0.000172674
Prkce	5692.05	-0.828003	0.178179	-4.64702	3.36757e-06	0.000180453
Tubb6	474.672	0.828591	0.17846	4.64302	3.4336e-06	0.000183208
Cd276	440.786	-0.839176	0.180845	-4.6403	3.479e-06	0.000184845
Akr1b10	291.905	0.91612	0.19755	4.63742	3.52784e-06	0.000186648
Clmp	1128.8	-0.858948	0.185264	-4.63634	3.54625e-06	0.000186834
Vegfc	1450.05	-0.776937	0.167753	-4.63144	3.63138e-06	0.000190518
Man1c1	868.182	-0.886765	0.191736	-4.62494	3.74715e-06	0.000194961
Tex11	95.4585	1.15083	0.248798	4.62555	3.736e-06	0.000194961
1700029J07Rik	73.9764	-1.19673	0.260484	-4.59424	4.3432e-06	0.000225039
Rhag	44.8852	1.27013	0.276548	4.59282	4.37295e-06	0.000225648
Anp32b	1733.44	-0.711418	0.154927	-4.59195	4.39118e-06	0.00022566
Tead1	6926.26	-0.760064	0.165594	-4.58994	4.43372e-06	0.000226916
Lingo2	782.025	0.723491	0.157671	4.5886	4.4623e-06	0.00022745
Alpk1	500.618	0.798816	0.174292	4.58322	4.57871e-06	0.000232439
Gm7876	18.8209	1.22863	0.268122	4.58236	4.59747e-06	0.00023245
Sh3rf1	2175.4	-0.809987	0.177433	-4.56502	4.99447e-06	0.000251509
Bend6	247.025	0.901175	0.197798	4.55603	5.21292e-06	0.00025972
Eml6	355.195	0.886192	0.194476	4.55682	5.1935e-06	0.00025972
Frem3	111.796	1.13207	0.248492	4.55576	5.21967e-06	0.00025972
Actn4	2664.34	-0.730287	0.160459	-4.55125	5.33282e-06	0.000264301
Gm5641	484.528	-0.801948	0.176266	-4.54963	5.37395e-06	0.000265291
Lipo1	382.093	0.810622	0.178567	4.53961	5.63584e-06	0.000277129
Sel1l2	41.8951	-1.26098	0.278228	-4.53218	5.83774e-06	0.000285935
Myoz2	983.208	0.675826	0.149441	4.52235	6.11577e-06	0.000298388
Malrd1	51.1466	-1.23632	0.273748	-4.51627	6.294e-06	0.000305891
Tm4sf1	452.415	-0.826882	0.18316	-4.51455	6.34525e-06	0.000307193
Arid5b	3145.32	-0.696706	0.154706	-4.50341	6.68728e-06	0.000322507
Adamts2	436.352	-0.971958	0.215982	-4.50018	6.78968e-06	0.000326191
Ahdc1	1289.91	-0.902705	0.200766	-4.49631	6.91436e-06	0.000329654
Sap130	1422.07	-0.734506	0.163346	-4.49662	6.90434e-06	0.000329654
Gm20696	73.1198	-1.223	0.272461	-4.48872	7.16512e-06	0.000340316
Egln1	1105.91	-0.722947	0.161191	-4.48505	7.28983e-06	0.000344772
Kirrel	1919.36	-0.805516	0.179629	-4.48434	7.31392e-06	0.000344772
Atp5e	1054.1	0.755541	0.168588	4.48157	7.40954e-06	0.000347971
Etv6	5324.41	-0.761994	0.170159	-4.47811	7.53051e-06	0.000351531
Nckap5	2995.05	-0.732906	0.163675	-4.47781	7.54142e-06	0.000351531
Col12a1	989.307	-0.6707	0.149857	-4.47559	7.62013e-06	0.000353885
Fam19a2	747.5	-0.699087	0.156297	-4.4728	7.72021e-06	0.000357209
Riok3	2987.85	0.676003	0.151248	4.46951	7.83975e-06	0.000361381
Slc35f3	52.6465	1.22816	0.274833	4.46874	7.868e-06	0.000361381
Slc1a5	199.543	-0.96161	0.215396	-4.46439	8.02966e-06	0.00036746
Gm8246	26.1074	1.23619	0.277621	4.45282	8.47492e-06	0.000386425
Gm3685	14.8131	1.13504	0.25522	4.4473	8.69563e-06	0.000395053
Spen	789.621	-0.780725	0.175898	-4.43852	9.058e-06	0.00041003
Gas7	820.768	-0.902649	0.203915	-4.4266	9.573e-06	0.000430237
Gm10251	61.4991	1.18341	0.267333	4.42672	9.56751e-06	0.000430237
Heg1	2476.26	-0.761568	0.172424	-4.41683	1.00157e-05	0.000448524
Narfl	22.0321	1.16237	0.263525	4.41085	1.02964e-05	0.000459452
Tpm1	23730.4	0.584018	0.132671	4.40201	1.07255e-05	0.000476903
Cxcl12	525.183	-0.73437	0.166921	-4.39952	1.08493e-05	0.000480703
Ctdspl	1371.2	-0.823105	0.18713	-4.39858	1.08964e-05	0.000481091
Tram2	622.951	-0.843067	0.191896	-4.39336	1.11611e-05	0.000491049
Ski	2518.04	-0.756817	0.172435	-4.389	1.13876e-05	0.000499261
Gcnt1	958.85	-0.678182	0.154838	-4.37994	1.18711e-05	0.000518645
Pdzrn3	10528.1	-0.691779	0.158089	-4.37589	1.2094e-05	0.000526551
Npl	183.798	-0.939318	0.215051	-4.36788	1.25459e-05	0.000544334
Gm14308	1574.21	-0.670696	0.153689	-4.36397	1.27722e-05	0.00054855
Lrrn2	321.049	-0.987144	0.226214	-4.36376	1.27847e-05	0.00054855
Npas3	4238.07	-0.595648	0.136517	-4.36319	1.2818e-05	0.00054855
Tbc1d4	2383.8	-0.645958	0.147978	-4.36523	1.26991e-05	0.00054855
Mn1	294.796	-0.954785	0.219032	-4.35911	1.30593e-05	0.000556974
Mut	959.382	0.727185	0.167275	4.34724	1.37861e-05	0.000585978
Col14a1	460.803	-0.76766	0.177252	-4.3309	1.48503e-05	0.000626961
Xylt1	2062.55	-0.812223	0.187535	-4.33105	1.48403e-05	0.000626961
Stk10	254.442	-0.876598	0.202505	-4.32878	1.49937e-05	0.000630893
Adcy1	411.519	0.754939	0.17479	4.31911	1.56658e-05	0.000656967
1110002E22Rik	413.277	-0.846397	0.196032	-4.31764	1.57704e-05	0.000659152
Sipa1l3	418.474	-0.822382	0.190667	-4.31318	1.6092e-05	0.000670357
Col1a1	859.488	-0.827182	0.19209	-4.30622	1.66071e-05	0.000689527
Maml3	4940.83	-0.742043	0.172363	-4.30512	1.66897e-05	0.000690669
Hsd17b7	569.817	0.746128	0.173347	4.30424	1.67563e-05	0.000691141
Asb1	508.144	0.72856	0.169927	4.28748	1.80711e-05	0.000740503
Igf1r	9836	-0.639182	0.149061	-4.28805	1.80245e-05	0.000740503
Mcmdc2	15.8126	-1.09416	0.255584	-4.28102	1.86041e-05	0.000757393
Ndst4	406.008	0.787487	0.183936	4.28131	1.85798e-05	0.000757393
2900026A02Rik	513.291	-0.940483	0.220012	-4.27469	1.91404e-05	0.000776703
Pkhd1l1	2072.99	0.76753	0.179604	4.27345	1.92468e-05	0.000778503
Fam13c	560.987	-0.778979	0.182394	-4.27087	1.9471e-05	0.000785039
Lmx1a	42.5081	1.18093	0.276718	4.26764	1.97553e-05	0.000793949
Tnfrsf10b	227.406	0.89097	0.209035	4.2623	2.02334e-05	0.000810562
Mpped2	2421.95	-0.724969	0.170187	-4.25984	2.04574e-05	0.000816929
Nes	1943.77	0.585638	0.137568	4.25707	2.07127e-05	0.000824496
Cobll1	981.827	-0.684103	0.160781	-4.25487	2.0917e-05	0.000829995
Lct	22.2999	-1.16033	0.272828	-4.253	2.10929e-05	0.000834334
Nt5dc1	396.868	-0.9283	0.218438	-4.24972	2.14039e-05	0.000839078
Tns3	2812.36	-0.59834	0.140799	-4.24962	2.14136e-05	0.000839078
Zfp641	123.493	-1.00188	0.235741	-4.24991	2.13856e-05	0.000839078
Tns1	5235.69	-0.778881	0.183705	-4.23984	2.23682e-05	0.000873752
Slc25a21	215.379	0.869916	0.205863	4.22569	2.38205e-05	0.000927595
Gm14288	610.843	0.695492	0.164669	4.22357	2.4046e-05	0.000933475
Hnrnpa3	5073.77	-0.584228	0.138363	-4.22243	2.41685e-05	0.000935335
Slc28a1	40.8322	1.17257	0.277774	4.22132	2.42873e-05	0.000936593
Tfcp2l1	174.405	0.940662	0.222867	4.22074	2.43504e-05	0.000936593
Adam22	1669.75	0.583746	0.138407	4.2176	2.46913e-05	0.000946802
Abcc12	21.5216	1.1515	0.273505	4.21018	2.5517e-05	0.00097548
Hmcn1	5226.38	-0.568158	0.135169	-4.2033	2.63047e-05	0.00100254
Gm20938	15.1873	-1.08596	0.258635	-4.19879	2.68343e-05	0.00101962
Ncor2	1262.35	-0.796857	0.189823	-4.19789	2.69408e-05	0.00102058
Ldlrad4	5660.28	-0.668651	0.159621	-4.18898	2.80213e-05	0.00105513
Tnnt3	85.0234	1.09594	0.261608	4.18924	2.79886e-05	0.00105513
Tnrc18	872.347	-0.859841	0.205529	-4.18356	2.86982e-05	0.00107738
Oprk1	234.674	0.834011	0.199448	4.1816	2.89466e-05	0.00108347
Trak1	831.284	-0.810815	0.194066	-4.17804	2.9403e-05	0.00109727
Gm2026	1348.65	-0.661518	0.158451	-4.1749	2.98119e-05	0.00110595
Snca	465.364	0.769207	0.184245	4.17492	2.98096e-05	0.00110595
Ppargc1b	1584.01	-0.697819	0.167295	-4.17119	3.03009e-05	0.00112078
Abl2	1880.02	-0.631878	0.151792	-4.16277	3.14405e-05	0.00115611
Tmcc3	856.326	-0.72147	0.173305	-4.16301	3.14083e-05	0.00115611
Gm14435	688.658	0.678711	0.163297	4.15631	3.23426e-05	0.0011858
Spsb4	560.602	-0.740304	0.178268	-4.15277	3.28478e-05	0.00119961
Xlr4a	23.3355	1.11407	0.268301	4.15233	3.29105e-05	0.00119961
Scn7a	409.736	0.786321	0.189507	4.14929	3.33506e-05	0.00121212
Prrc1	135.519	-1.06423	0.256655	-4.14654	3.37536e-05	0.00122323
Gm4631	1465.13	-0.651238	0.157249	-4.14144	3.45125e-05	0.00124712
Hmbs	638.109	0.717865	0.173464	4.13842	3.49712e-05	0.00125951
Nlgn2	196.039	-0.96596	0.233444	-4.13786	3.50562e-05	0.00125951
Ckb	288.794	0.851399	0.205809	4.13685	3.52104e-05	0.00126144
Zfp804a	899.553	-0.664326	0.160834	-4.13052	3.61944e-05	0.001293
Gm14440	611.229	0.680428	0.164844	4.12772	3.66377e-05	0.00130142
Pitpnm2	699.533	-0.881678	0.213576	-4.12817	3.65665e-05	0.00130142
Bai3	751.644	0.670326	0.162558	4.1236	3.72994e-05	0.00132118
Hist1h2bm	167.338	-1.01205	0.245614	-4.12048	3.78082e-05	0.00133543
Tshz2	325.871	-0.865923	0.210404	-4.11554	3.86279e-05	0.00136055
Sgk3	843.096	-0.634582	0.154274	-4.11334	3.89971e-05	0.0013697
Smad1	1263.26	-0.630132	0.15334	-4.10938	3.96729e-05	0.00138955
Rara	508.817	-0.837284	0.203984	-4.10466	4.04913e-05	0.00141426
Dact3	330.323	-0.810383	0.197478	-4.10366	4.06657e-05	0.00141641
Galntl6	428.795	0.728901	0.178148	4.09155	4.28503e-05	0.00148836
Tnni2	62.5112	1.09948	0.268989	4.08745	4.36144e-05	0.00151072
Cd1d2	59.9286	1.09029	0.267876	4.07014	4.69852e-05	0.00162299
Alg9	595.512	-0.671946	0.165231	-4.0667	4.76836e-05	0.0016426
Nfkbib	13.9163	-1.02171	0.251797	-4.05767	4.9565e-05	0.00170273
Mast4	12335.8	-0.626367	0.154583	-4.05198	5.07858e-05	0.0017399
2310022B05Rik	579.288	-0.736786	0.18193	-4.04983	5.12549e-05	0.00174134
Casq1	2240.2	0.591513	0.14608	4.04924	5.13835e-05	0.00174134
Gm10451	45.0348	1.12054	0.276646	4.05044	5.11223e-05	0.00174134
Grip1	14783.7	0.542207	0.13389	4.04964	5.12972e-05	0.00174134
Gm21103	15.082	1.05017	0.259665	4.04431	5.2477e-05	0.00177361
Fbxw4	709.428	-0.809814	0.20028	-4.04341	5.26791e-05	0.00177565
Egln3	278.351	-0.814148	0.201655	-4.03732	5.4065e-05	0.00181262
Pdzd2	1303.24	-0.646737	0.160189	-4.03735	5.40582e-05	0.00181262
Abca6	52.4203	-1.10563	0.274023	-4.03482	5.46451e-05	0.00182719
Rimbp2	55.2272	-1.11716	0.277124	-4.03127	5.54771e-05	0.00184028
Vps26b	158.093	-0.994057	0.246576	-4.03144	5.54361e-05	0.00184028
Wwox	2717.56	-0.731	0.1813	-4.032	5.53048e-05	0.00184028
Zfp532	3738.9	-0.64244	0.159407	-4.0302	5.57296e-05	0.00184378
Ap4s1	296.387	-0.770604	0.191296	-4.02834	5.61728e-05	0.00185356
Flt1	1522.99	-0.616356	0.153131	-4.02502	5.69712e-05	0.00187497
Zmiz1	3256.44	-0.767895	0.191447	-4.01101	6.046e-05	0.00198458
Cox5b	1276.87	0.675736	0.168562	4.00882	6.10218e-05	0.00199779
Gm14434	1225.57	-0.639247	0.159625	-4.00467	6.21033e-05	0.00201218
Hpse2	1327.96	-0.669684	0.167191	-4.00551	6.1884e-05	0.00201218
Stard8	650.836	-0.716955	0.178951	-4.00644	6.1642e-05	0.00201218
Uso1	965.261	-0.719661	0.179694	-4.00493	6.20369e-05	0.00201218
Daam2	1291.94	-0.603956	0.150917	-4.00191	6.28331e-05	0.00203058
Gm10339	36.7161	1.11619	0.278996	4.00075	6.31418e-05	0.00203531
Gm21598	14.1351	-1.02117	0.255284	-4.00012	6.33112e-05	0.00203554
Cdh10	320.256	0.773517	0.193624	3.99493	6.47127e-05	0.00207528
Eif4g3	3646.26	-0.734119	0.183882	-3.99233	6.54262e-05	0.00209281
Col6a3	1437.11	-0.589951	0.147986	-3.98653	6.70464e-05	0.00213917
Creb3l2	5672.13	-0.696556	0.174843	-3.98388	6.77979e-05	0.00215766
Akirin2	802.665	-0.636748	0.159998	-3.97971	6.89982e-05	0.0021903
Foxn3	3356.81	-0.663324	0.166726	-3.97854	6.93402e-05	0.0021956
Dpysl4	74.6701	-1.05115	0.264328	-3.97668	6.98831e-05	0.00220722
Anxa4	315.465	0.742879	0.1871	3.97048	7.17265e-05	0.00225436
Cyp4f13	133.869	0.949151	0.239054	3.97046	7.17352e-05	0.00225436
Gm5458	25.6352	1.09738	0.27654	3.96825	7.24018e-05	0.00226962
Acvr1	2400.73	-0.617533	0.15598	-3.95904	7.52512e-05	0.00235305
Serinc2	65.5137	-1.06125	0.268615	-3.95083	7.78809e-05	0.00242923
Gm20878	13.7998	-1.0027	0.254304	-3.94293	8.04919e-05	0.00250444
Foxp4	689.378	-0.794879	0.20192	-3.93661	8.26409e-05	0.00253979
Mdfi	196.496	-0.870228	0.221035	-3.93706	8.24856e-05	0.00253979
Pkig	928.144	-0.680954	0.172952	-3.93724	8.24232e-05	0.00253979
Rnf165	415.681	-0.867115	0.22018	-3.9382	8.20939e-05	0.00253979
Synpo	1060.42	-0.771898	0.196015	-3.93796	8.21784e-05	0.00253979
Cnbd2	49.7964	-1.0866	0.276494	-3.92992	8.49733e-05	0.00260509
Nfya	883.113	-0.593265	0.151097	-3.92638	8.62327e-05	0.00263725
Samd4	6653.63	-0.574459	0.146557	-3.91971	8.86562e-05	0.00270477
Sbk1	553.822	-0.681356	0.173857	-3.91906	8.88951e-05	0.00270548
Rpl21	4331.88	0.526459	0.134442	3.91588	9.00744e-05	0.00273473
Synj2	347.932	-0.744926	0.190279	-3.91491	9.04374e-05	0.00273912
Abcd2	286.482	0.765644	0.195665	3.91303	9.11448e-05	0.00275389
Myo16	177.531	-0.892585	0.228164	-3.91203	9.15249e-05	0.00275873
Tmem163	1661.56	-0.599131	0.153272	-3.90894	9.27017e-05	0.0027875
Ano4	4346.24	-0.596499	0.152647	-3.90771	9.31738e-05	0.00279499
Hmgn5	226.38	-0.805339	0.206325	-3.90326	9.49065e-05	0.00284017
Smad7	1579.79	-0.636287	0.163083	-3.90161	9.55536e-05	0.00285273
Gabra1	61.6154	1.03945	0.266647	3.8982	9.691e-05	0.00288635
Crb1	99.026	0.972504	0.249679	3.89502	9.81904e-05	0.00291756
Lats2	958.588	-0.63812	0.163858	-3.89434	9.84655e-05	0.00291882
Col27a1	490.383	-0.708942	0.182099	-3.89318	9.89387e-05	0.00291904
Msi2	12900.9	-0.663843	0.170503	-3.89344	9.8832e-05	0.00291904
Vcp	3139.56	0.526618	0.13531	3.89194	9.94454e-05	0.0029271
Ppm1l	3029.92	-0.570443	0.146705	-3.88837	0.000100921	0.00296222
Tshz3	378.235	-0.706377	0.181685	-3.88791	0.000101111	0.00296222
Kcnh7	6955.51	0.527242	0.135753	3.88383	0.000102825	0.00300541
Zcwpw1	111.224	0.950736	0.244858	3.8828	0.000103261	0.00301113
Itgb1bp2	926.502	0.685906	0.176761	3.88041	0.000104279	0.00303377
Smg9	132.913	-0.909418	0.234463	-3.87872	0.000105007	0.00304789
Ncl	5227.1	-0.521337	0.134868	-3.86553	0.000110848	0.00320997
Mlf1	790.485	0.692776	0.179266	3.86451	0.000111313	0.00321602
Sulf2	1727.72	-0.598704	0.155147	-3.85895	0.000113877	0.00328255
Qsox1	856.507	0.584072	0.151422	3.85726	0.000114667	0.00329735
Slc2a10	81.1653	-0.98595	0.255644	-3.85672	0.000114917	0.00329735
Stab2	11.6977	0.939293	0.243684	3.85456	0.000115939	0.00331909
Itpkb	635.675	-0.760597	0.197595	-3.84926	0.000118475	0.00337626
Ndrg1	214.322	-0.796344	0.206858	-3.84972	0.000118252	0.00337626
Klk1b22	11.5849	0.937084	0.243545	3.84767	0.000119244	0.00339048
Trabd2b	3630.67	-0.691996	0.179893	-3.8467	0.000119718	0.00339625
Fnbp1	1288.52	-0.693013	0.180192	-3.84597	0.000120075	0.00339869
Aqp9	27.5551	-1.06978	0.278205	-3.84527	0.000120418	0.00340072
Kmt2d	582.608	-0.810785	0.210976	-3.84301	0.000121534	0.00342452
H2-T22	86.4342	-0.974322	0.253937	-3.83687	0.000124614	0.00350344
Fndc3b	9839.52	-0.541259	0.141466	-3.82607	0.000130203	0.00364424
Igfbp3	446.649	0.785488	0.205407	3.82406	0.000131273	0.003666
Cacna2d2	1722.17	-0.725689	0.189904	-3.82135	0.000132722	0.00369822
Myl6	5209.13	0.584024	0.152926	3.819	0.000133993	0.00372535
Col5a1	2287.89	-0.610932	0.160048	-3.81718	0.000134988	0.00373661
Zfp710	623.061	-0.772184	0.202293	-3.81717	0.000134994	0.00373661
Alox8	16.7165	-0.998394	0.26169	-3.81518	0.000136082	0.00375845
Cuedc1	739.119	-0.694656	0.182143	-3.81379	0.00013685	0.00377133
Tmem45a	327.764	-0.761621	0.20001	-3.80792	0.000140143	0.00385362
Stard6	41.0512	-1.05754	0.277992	-3.80422	0.000142254	0.00390311
Cacna1g	414.102	-0.73732	0.193878	-3.80301	0.000142949	0.00391363
Sorcs2	1073.98	-0.733401	0.193029	-3.79943	0.000145026	0.00396184
Cct8	5051.93	-0.595158	0.156691	-3.79829	0.000145696	0.00397147
Smo	1120.4	-0.609245	0.160692	-3.79139	0.000149809	0.00407475
Peli2	1185.78	-0.557601	0.147188	-3.78838	0.000151636	0.00411011
Srrm2	4087.9	-0.685716	0.181015	-3.78816	0.000151765	0.00411011
B3galt1	2206.11	-0.544315	0.143832	-3.78439	0.000154085	0.00416394
Acvr1c	918.813	0.624348	0.165045	3.78291	0.000155007	0.00417512
Arhgap23	841.781	-0.738016	0.195105	-3.78266	0.000155164	0.00417512
Cnn1	1854.95	0.529927	0.140415	3.774	0.000160649	0.00431345
Eng	1053.26	-0.706555	0.187387	-3.77057	0.000162875	0.00435456
L3hypdh	150.113	-0.855976	0.227004	-3.77076	0.000162751	0.00435456
Ephb2	511.171	-0.730235	0.193714	-3.76965	0.000163479	0.00436142
Eln	499.636	-0.697796	0.185198	-3.76784	0.000164665	0.00438373
Cux2	460.647	-0.822688	0.218391	-3.76704	0.000165193	0.00438847
Kel	423.649	0.840402	0.223172	3.76572	0.000166069	0.0044024
Adamtsl3	439.157	-0.7082	0.188602	-3.755	0.000173343	0.00458554
Tenm3	9311.5	-0.537741	0.143232	-3.75432	0.00017381	0.00458823
Sema4d	453.429	-0.688419	0.183585	-3.74986	0.000176931	0.00466078
Sash1	1550.3	-0.620581	0.16571	-3.74498	0.000180409	0.00474245
Gpr137b	311.079	0.699086	0.18684	3.74163	0.000182829	0.004796
Tomm22	655.063	0.666762	0.178334	3.73883	0.000184879	0.00483966
Dynll2	633.747	-0.661973	0.17764	-3.72648	0.000194175	0.00507241
Gm3604	120.791	0.870634	0.233746	3.7247	0.000195548	0.00509767
Prelid2	929.386	-0.587798	0.15786	-3.72354	0.000196447	0.00511047
Dhx9	3863.56	-0.525205	0.141407	-3.71414	0.000203893	0.00529318
Gm10020	1266.09	0.697232	0.187803	3.71258	0.00020516	0.00531509
Dkk2	322.043	-0.732668	0.197543	-3.7089	0.000208163	0.00538178
Ezh2	2137.77	-0.576232	0.155509	-3.70547	0.000211003	0.00544397
Gm3618	31.5772	1.03267	0.278989	3.70148	0.000214346	0.00551885
Reln	1113.89	0.633079	0.171094	3.70018	0.000215449	0.0055359
Oprd1	67.9966	0.974785	0.263527	3.699	0.000216451	0.00555026
Slc22a29	20.0756	-0.993774	0.268792	-3.69719	0.000218	0.00557858
Slc9a9	1272.38	-0.576757	0.156068	-3.69556	0.000219401	0.005603
A830018L16Rik	165.973	0.819091	0.221785	3.69318	0.000221466	0.00564422
Hif3a	876.906	-0.759444	0.205737	-3.69134	0.00022308	0.00567383
Ckm	67.1434	0.967575	0.262276	3.68914	0.00022501	0.00568831
Gm11007	1057.35	-0.604959	0.163967	-3.68952	0.000224677	0.00568831
Ppm1e	1070.76	-0.655572	0.177675	-3.68972	0.000224503	0.00568831
Ksr1	869.817	-0.738878	0.200373	-3.68751	0.000226462	0.00571349
Prickle2	3291.59	-0.554888	0.150537	-3.68607	0.000227747	0.00573438
Mrap	23.982	-1.01402	0.275556	-3.67991	0.000233314	0.00586277
Gpx1	848.941	0.63831	0.173558	3.6778	0.000235258	0.00589981
Zfp462	4871.63	-0.512415	0.13937	-3.67665	0.000236321	0.00591462
Slc12a8	53.9109	-0.995549	0.270922	-3.67466	0.000238162	0.00592959
Zfp97	405.171	0.658328	0.179162	3.67448	0.000238338	0.00592959
Hnrnpul2	1555.58	-0.519435	0.141531	-3.67011	0.00024245	0.0060151
Myo1d	1326.96	-0.624818	0.170259	-3.66981	0.000242734	0.0060151
Fam177a	211.546	0.768027	0.209589	3.66443	0.000247885	0.00610378
Fst	262.277	0.760592	0.207582	3.66405	0.00024826	0.00610378
Gypa	65.4639	0.982716	0.268113	3.66531	0.000247041	0.00610378
Mxi1	1025.3	-0.56631	0.154525	-3.66483	0.000247498	0.00610378
Gltp	80.425	-0.948413	0.259121	-3.66012	0.000252093	0.00618589
Retsat	216.131	-0.767054	0.209794	-3.65622	0.000255961	0.00626853
Itga5	1076.96	-0.650085	0.177838	-3.65549	0.000256692	0.00627419
Bmp6	930.036	-0.729828	0.199747	-3.65375	0.000258434	0.00629225
Prrc2b	2223.25	-0.669922	0.183339	-3.65401	0.000258179	0.00629225
4930452B06Rik	999.232	0.544386	0.149106	3.65099	0.000261227	0.00633564
Mtss1l	416.263	-0.804452	0.220322	-3.65126	0.00026096	0.00633564
Fn1	16935.2	-0.616959	0.169041	-3.64977	0.00026248	0.00635374
Shisa9	1055.78	-0.553221	0.151726	-3.64618	0.000266172	0.00643069
Snap91	3282.43	-0.52273	0.143493	-3.6429	0.000269586	0.00650065
Gm4724	1122.54	-0.592766	0.1628	-3.64107	0.000271502	0.00652178
Wscd2	100.364	-0.958989	0.263345	-3.64156	0.00027099	0.00652178
Rtn1	461.903	-0.687232	0.188822	-3.63958	0.000273081	0.00654716
Fxyd6	515.852	0.622248	0.171003	3.63881	0.000273897	0.00654742
Pbx1	17005.7	-0.514366	0.141602	-3.63247	0.000280719	0.00669189
Nfatc2	186.305	-0.876224	0.241366	-3.63027	0.000283124	0.00673455
Ttc28	3618.48	-0.689413	0.189929	-3.62985	0.000283583	0.00673455
Opcml	1257.35	-0.5349	0.147383	-3.62932	0.00028417	0.00673574
Nphp3	164.247	0.822269	0.226682	3.62741	0.000286276	0.00677286
Kcng2	1022.05	-0.683253	0.188488	-3.62492	0.000289056	0.00681732
Lef1	954.965	-0.744061	0.205272	-3.62475	0.000289243	0.00681732
Atpaf2	414.855	0.662522	0.183033	3.6197	0.000294949	0.00692578
Btrc	1934.84	-0.589518	0.162851	-3.61998	0.000294625	0.00692578
Nelfcd	666.667	0.58186	0.160782	3.61895	0.000295806	0.00693291
Elf4	610.239	-0.692616	0.191686	-3.61328	0.000302353	0.00707314
Dnaja3	367.149	0.769238	0.212923	3.61275	0.000302965	0.00707425
Rhobtb2	231.275	-0.742643	0.20572	-3.60998	0.000306223	0.00713704
Klhl29	786.506	-0.617855	0.171352	-3.60576	0.000311241	0.00722714
Mrc2	834.114	-0.669202	0.185587	-3.60587	0.000311103	0.00722714
Nomo1	586.401	-0.643618	0.178524	-3.60522	0.000311893	0.00722888
Tcf4	7764.36	-0.509588	0.141391	-3.6041	0.000313241	0.00724673
Dock6	648.328	-0.681471	0.189187	-3.60211	0.000315644	0.00727549
Ntn4	378.419	-0.693251	0.192442	-3.60239	0.000315301	0.00727549
Il11ra2	177.464	-0.783416	0.217534	-3.60135	0.000316572	0.00728349
Gm8206	45.2312	0.993677	0.276048	3.59966	0.000318639	0.00731761
Ivns1abp	5711.89	0.543457	0.151165	3.59512	0.000324245	0.00743273
Brd2	1267.68	-0.514449	0.143204	-3.59243	0.000327612	0.00749623
Adamts12	896.138	0.539036	0.150137	3.59031	0.000330289	0.00754371
Leprel1	2091.22	-0.574798	0.160163	-3.58884	0.000332151	0.00757245
Naga	222.967	0.727351	0.202719	3.58798	0.000333249	0.00758369
Ddx4	37.9812	0.997372	0.278133	3.58596	0.000335845	0.00762892
Tagln	1194.3	0.576625	0.160852	3.58483	0.000337301	0.00764814
Bcorl1	565.881	-0.647356	0.180699	-3.5825	0.000340319	0.00768906
Myl7	20634.2	0.589616	0.164583	3.58249	0.000340332	0.00768906
Uvrag	1657.66	-0.546405	0.152544	-3.58196	0.000341021	0.00769076
Cep70	401.681	0.672572	0.187808	3.58118	0.000342048	0.00770007
Cacng7	85.948	-0.944659	0.263921	-3.57932	0.000344487	0.00771344
Dcun1d4	940.974	-0.558246	0.155948	-3.57968	0.000344015	0.00771344
Rffl	113.885	-0.914282	0.255378	-3.58011	0.000343452	0.00771344
Mark2	760.114	-0.761577	0.213041	-3.57479	0.000350504	0.00783416
Susd4	190.449	-0.79613	0.22284	-3.57265	0.000353391	0.00788465
Cit	557.277	-0.71348	0.199848	-3.57011	0.000356827	0.00794716
Syngap1	346.878	-0.789369	0.221201	-3.56856	0.000358952	0.00798031
Slc4a8	76.7189	0.917732	0.25732	3.56649	0.000361788	0.00802914
Hunk	1525.36	-0.582626	0.1634	-3.56564	0.000362965	0.00804103
Pkp4	4800.37	-0.538746	0.151199	-3.56316	0.000366413	0.0081031
Kcnb1	63.1136	-0.963526	0.270662	-3.55989	0.00037101	0.00817591
Tsc22d4	264.186	-0.76475	0.214803	-3.56024	0.000370519	0.00817591
Cux1	3541.72	-0.634849	0.178366	-3.55925	0.000371919	0.00818157
Inpp5a	3495.32	-0.559878	0.157376	-3.55757	0.0003743	0.00821953
Pcmtd2	1252.86	0.513058	0.144236	3.55706	0.000375025	0.00822105
Irak1bp1	130.568	0.819389	0.230519	3.55454	0.000378636	0.00827128
1700001O22Rik	16.9459	-0.945014	0.265975	-3.55302	0.000380832	0.00830478
Acot7	642.801	-0.625524	0.17616	-3.55088	0.000383951	0.00834379
Zfp286	356.421	0.659894	0.185838	3.5509	0.000383912	0.00834379
Add2	151.437	0.82238	0.23164	3.55025	0.000384872	0.00834933
Cntn6	70.6372	0.926539	0.261024	3.54964	0.000385763	0.0083542
Lgals8	682.06	0.59408	0.167463	3.54753	0.000388869	0.00839247
Rbms3	14730.8	-0.53851	0.151854	-3.54624	0.000390768	0.00841897
Dlg5	1096.04	-0.70242	0.198187	-3.54422	0.000393769	0.00846907
Bach2	4196.74	-0.552007	0.155932	-3.54006	0.00040004	0.00858922
Pitpnc1	1348.05	-0.631671	0.178488	-3.53901	0.000401629	0.00860859
Tmem230	350.45	0.653706	0.184952	3.53446	0.00040861	0.00874328
Prps2	662.798	0.61205	0.173382	3.53006	0.000415459	0.00887468
Hdac7	705.695	-0.683527	0.193799	-3.52698	0.000420324	0.00894812
Tanc1	4337.58	-0.504115	0.14292	-3.52726	0.00041988	0.00894812
Dlgap4	1115.23	-0.657938	0.186639	-3.52519	0.000423178	0.00895751
Fli1	1889.28	-0.522667	0.148297	-3.52447	0.000424337	0.00895751
Grb2	1083.83	-0.591433	0.167799	-3.52464	0.000424058	0.00895751
Ntn1	968.321	-0.619048	0.175593	-3.52546	0.000422749	0.00895751
Parva	3772.33	-0.549457	0.155886	-3.52474	0.0004239	0.00895751
Impact	1060.68	0.548636	0.155713	3.52337	0.000426096	0.00897952
Myh7b	523.392	-0.723763	0.2056	-3.52025	0.000431144	0.00907067
Gnpda2	89.1619	-0.889737	0.252812	-3.51936	0.000432587	0.00908578
C530008M17Rik	968.632	-0.573798	0.163079	-3.51852	0.000433958	0.00909932
Adh5	1075.1	0.582344	0.165581	3.51697	0.000436504	0.00910704
Agap3	793.374	-0.627324	0.178329	-3.51779	0.000435164	0.00910704
Shroom3	1952.27	-0.60297	0.171432	-3.51726	0.000436022	0.00910704
Prdx6	1617.84	0.564414	0.160604	3.51433	0.000440866	0.00918276
Rab11fip5	905.624	-0.607341	0.17317	-3.50721	0.000452836	0.00941645
Amt	211.802	0.7183	0.205032	3.50336	0.000459425	0.00948106
Gm2007	985.957	-0.581988	0.166099	-3.50385	0.000458576	0.00948106
Ptprb	2273.75	-0.54861	0.156542	-3.50456	0.000457358	0.00948106
Tspan5	1513.2	-0.532622	0.152018	-3.50369	0.000458864	0.00948106
Ttyh3	818.995	-0.714553	0.203972	-3.50319	0.000459724	0.00948106
Eef1a1	77614.6	0.532135	0.152018	3.50048	0.000464423	0.00956222
Osbpl10	587.254	-0.749882	0.214412	-3.49739	0.000469837	0.00965549
Rdh13	608.54	0.563999	0.16128	3.49702	0.000470492	0.00965549
Tatdn3	392.727	-0.643873	0.184234	-3.49486	0.000474314	0.00971801
Bcar3	616.33	-0.581523	0.166676	-3.48893	0.000484954	0.0099198
3830406C13Rik	385.402	0.621169	0.178215	3.48549	0.000491232	0.00999865
Hmgcs1	2389.08	0.521216	0.149557	3.48508	0.000491998	0.00999865
Mgat5	1607.54	-0.638629	0.183212	-3.48574	0.000490778	0.00999865
Stard9	765.352	-0.572602	0.164265	-3.48585	0.000490571	0.00999865
Atn1	236.126	-0.77438	0.222359	-3.48257	0.000496624	0.0100763
Trim10	115.1	0.912722	0.262452	3.47767	0.000505785	0.0102456
Cfl2	2531.85	0.554167	0.159397	3.47665	0.000507717	0.0102643
Dclre1c	102.968	-0.881391	0.253573	-3.47589	0.000509164	0.0102643
Fam213a	515.621	0.591176	0.17006	3.47628	0.000508423	0.0102643
Psmc3	1289.29	0.566089	0.163002	3.47291	0.00051485	0.0103623
Fyco1	1737.55	0.519743	0.149809	3.46938	0.000521669	0.0104827
Elmsan1	769.904	-0.652999	0.188253	-3.46874	0.000522909	0.0104908
Ppm1k	1276.41	0.560387	0.16161	3.46752	0.00052529	0.0105217
Gata4	8531.53	-0.545765	0.157483	-3.46555	0.000529153	0.0105822
Phyhip	16.6541	0.919789	0.265527	3.46401	0.000532179	0.0106258
Ttc9	148.048	-0.800524	0.231141	-3.46336	0.000533473	0.0106347
Crat	687.513	-0.548023	0.15833	-3.46126	0.000537651	0.010684
St6galnac3	6551.76	-0.512583	0.14809	-3.4613	0.000537578	0.010684
Svip	142.205	0.801283	0.231712	3.45809	0.000544019	0.0107934
Zfp943	695.436	-0.54652	0.158077	-3.45731	0.000545603	0.0108078
Maged2	5109.5	0.539406	0.156044	3.45676	0.000546717	0.0108127
Igsf3	2498.21	-0.503081	0.145781	-3.45093	0.000558666	0.0110317
Sipa1l2	2107.41	-0.500891	0.145188	-3.44994	0.000560713	0.0110547
Igf2bp2	3164.37	-0.528301	0.153176	-3.44898	0.000562708	0.0110766
Adamts20	215.28	-0.752205	0.218175	-3.44771	0.000565356	0.0110939
Mllt1	579.947	-0.622445	0.180535	-3.44779	0.000565202	0.0110939
Neto2	379.898	0.62509	0.181364	3.4466	0.000567688	0.0111222
B3gntl1	644.206	0.565396	0.164403	3.43908	0.000583688	0.0114001
Fam222a	42.6358	-0.955216	0.277803	-3.43846	0.000585033	0.0114086
Dab2ip	3825.79	-0.585551	0.17069	-3.43049	0.000602494	0.0117131
Gfra2	273.767	-0.680527	0.198377	-3.43048	0.000602515	0.0117131
Hnrnpa0	602.487	-0.591283	0.172458	-3.42857	0.000606773	0.0117776
Znrf1	1650.45	-0.626324	0.182855	-3.42525	0.000614233	0.011904
Tnk2	383.96	-0.722271	0.210918	-3.42441	0.000616131	0.0119223
Kmt2a	1966.57	-0.625484	0.182921	-3.41941	0.000627563	0.0121248
Cntn1	203.72	0.7473	0.218686	3.41723	0.000632619	0.012185
Eps8	855.867	-0.537835	0.157375	-3.41754	0.000631897	0.012185
Zfp704	3170.54	-0.52619	0.154047	-3.41577	0.000636008	0.0122314
Tbc1d15	719.444	-0.582499	0.170702	-3.41238	0.000643986	0.012347
A930011G23Rik	3630.11	-0.554968	0.162656	-3.41192	0.000645073	0.012349
Hspa5	11006.2	0.56315	0.16508	3.41137	0.000646375	0.012355
Gltscr1	250.505	-0.768001	0.225177	-3.41065	0.000648082	0.0123688
Rassf5	451.42	-0.703417	0.206378	-3.40839	0.000653473	0.0124527
Camta1	5242.93	-0.548007	0.160877	-3.40637	0.000658334	0.0125263
Dok5	240.032	-0.741516	0.217744	-3.40545	0.000660558	0.0125496
Sox5	10665	-0.515338	0.151398	-3.40387	0.000664373	0.012603
Rreb1	2856.04	-0.515905	0.15174	-3.39992	0.000674044	0.0127671
Adh6b	28.4573	0.948092	0.27898	3.39842	0.000677755	0.0128181
Tcf7l1	1777.49	-0.608659	0.179178	-3.39696	0.000681401	0.0128483
Col4a4	112.916	-0.832956	0.245341	-3.3951	0.000686042	0.0128885
Lmtk2	917.535	-0.56099	0.165247	-3.39487	0.00068662	0.0128885
Wnk4	108.58	-0.865259	0.254839	-3.39531	0.000685502	0.0128885
Ankrd33b	211.05	-0.753824	0.222118	-3.3938	0.000689309	0.0129197
Nav2	7221.44	-0.531989	0.157028	-3.38786	0.000704391	0.0131826
1700025G04Rik	2224.59	-0.50739	0.149892	-3.38503	0.000711713	0.0132998
Mrpl44	223.322	0.691812	0.204504	3.38288	0.000717308	0.0133844
Rbpms	10155.4	-0.53896	0.159362	-3.38199	0.000719627	0.0133878
Glis2	209.962	-0.814437	0.241113	-3.37783	0.00073061	0.013572
Casz1	865.92	-0.701565	0.207852	-3.37531	0.000737331	0.0136764
Myo10	859.703	-0.544855	0.161463	-3.3745	0.000739499	0.0136764
Pfkfb3	836.27	-0.548389	0.162498	-3.37474	0.000738851	0.0136764
Slc17a8	38.0532	-0.94112	0.279028	-3.37285	0.000743942	0.0137383
Slc6a6	942.274	-0.54951	0.163034	-3.37052	0.000750258	0.0138345
Tagap1	213.852	-0.696873	0.206814	-3.36957	0.000752859	0.0138621
Lrrc7	334.718	-0.628889	0.186741	-3.36771	0.000757948	0.0139354
Kremen1	790.079	-0.600559	0.178781	-3.35919	0.0007817	0.014351
Frzb	176.958	-0.720987	0.214722	-3.35777	0.000785733	0.0144039
Obscn	1299.33	-0.558316	0.166321	-3.35686	0.000788344	0.0144307
Actn1	2985.83	-0.578305	0.17245	-3.35347	0.000798037	0.0145869
Edc3	373.974	-0.600336	0.179318	-3.34789	0.000814294	0.0148623
Shank3	688.475	-0.65235	0.195084	-3.34395	0.000825946	0.0150313
Rarg	195.627	-0.709541	0.212254	-3.34288	0.000829126	0.0150341
Romo1	177.603	0.73035	0.218491	3.34269	0.000829698	0.0150341
Tubb2b	1185.07	0.535893	0.160308	3.34289	0.000829119	0.0150341
Bcl11b	275.503	-0.771052	0.230697	-3.34227	0.000830963	0.0150353
Arhgef17	1242.4	-0.554257	0.16603	-3.3383	0.000842932	0.0152299
Lrp5	678.959	-0.625787	0.187723	-3.33357	0.000857393	0.0154689
Tmem182	328.949	0.630866	0.189281	3.33296	0.000859276	0.0154806
Rftn1	797.675	-0.605154	0.181648	-3.33146	0.000863912	0.0155417
Gm13225	276.594	0.658518	0.197725	3.33047	0.000867006	0.0155751
Cttnbp2nl	1420.96	-0.531396	0.159756	-3.3263	0.000880067	0.0157871
Tex21	36.31	0.927315	0.27892	3.32467	0.000885237	0.0158345
Gab2	3914.28	-0.526427	0.158431	-3.32276	0.000891323	0.0159206
2310067B10Rik	484.384	-0.66506	0.200348	-3.31952	0.000901714	0.0160605
3110052M02Rik	112.95	0.795447	0.239751	3.31781	0.000907276	0.0161138
Fam219a	182.125	-0.777916	0.234569	-3.31636	0.000911991	0.0161746
D430041D05Rik	66.3443	-0.878625	0.26527	-3.3122	0.000925662	0.0163477
Cage1	144.421	0.740948	0.223906	3.3092	0.000935633	0.0164774
Runx1	234.91	-0.717385	0.217061	-3.30498	0.000949817	0.0167002
Syt6	18.1095	0.88833	0.268817	3.30459	0.000951142	0.0167002
Zdhhc14	824.136	-0.561562	0.169951	-3.30426	0.000952283	0.0167002
Slc16a1	1917.9	0.532187	0.161228	3.30084	0.000963971	0.0168816
Tiam1	986.071	-0.581386	0.176159	-3.30036	0.000965622	0.0168869
Arhgef1	396.692	-0.658612	0.199667	-3.29856	0.000971835	0.0169719
Gid4	506.722	-0.559137	0.169596	-3.29687	0.000977701	0.0170477
Jdp2	238.09	-0.690664	0.209529	-3.29627	0.000979791	0.0170477
Sorbs2	6834.43	-0.51874	0.157436	-3.29493	0.000984446	0.0170969
Rps23	4668.19	0.503753	0.152932	3.29398	0.000987803	0.0171315
Eml1	1000.34	-0.540123	0.164131	-3.2908	0.000999042	0.0173025
Ltbp4	195.687	-0.816156	0.248076	-3.28995	0.00100206	0.0173307
Col4a2	1855.12	-0.5456	0.165974	-3.28725	0.0010117	0.0174494
Ncoa1	2295.82	-0.508149	0.154576	-3.28737	0.00101129	0.0174494
Vill	103.634	0.806025	0.245379	3.28482	0.00102047	0.0175764
Slc26a7	56.1882	-0.906239	0.275922	-3.28441	0.00102197	0.0175782
Celsr1	376.845	-0.638027	0.194406	-3.28193	0.00103098	0.0176605
D630045J12Rik	649.925	-0.620151	0.188939	-3.28228	0.00102972	0.0176605
Stk19	148.854	-0.785041	0.239231	-3.28152	0.0010325	0.0176623
Bai2	196.378	-0.726496	0.221458	-3.28051	0.0010362	0.0176625
Ctif	1368.06	-0.62883	0.191695	-3.28036	0.00103673	0.0176625
Purg	1308.53	-0.524279	0.159804	-3.28075	0.00103531	0.0176625
4932418E24Rik	74.1462	0.850265	0.259361	3.27831	0.00104432	0.0177475
Nckap5l	366.634	-0.701532	0.213996	-3.27824	0.00104455	0.0177475
Hmgcs2	381.123	-0.608902	0.18591	-3.27525	0.00105567	0.0179121
Htr1f	59.3946	0.889448	0.271848	3.27185	0.00106845	0.0181044
Ddx59	241.297	0.653993	0.200004	3.2699	0.00107586	0.0181809
Stbd1	864.581	0.528825	0.161872	3.26693	0.00108721	0.018348
Cldn11	245.307	0.643309	0.197119	3.26355	0.00110024	0.0184932
Coro6	281.216	-0.679076	0.208055	-3.26393	0.00109878	0.0184932
Rps11	3844.72	0.506525	0.155185	3.264	0.00109851	0.0184932
Cpm	57.8455	0.893082	0.273755	3.26235	0.00110495	0.0185474
Ccdc149	147.676	-0.730544	0.223981	-3.26164	0.00110771	0.018569
Alpk3	1382.72	-0.548831	0.168427	-3.25857	0.00111977	0.018746
Nfic	149.872	-0.787185	0.241646	-3.2576	0.00112358	0.0187783
Prrc2a	647.158	-0.655089	0.201113	-3.25732	0.00112469	0.0187783
Zfp362	482.66	-0.677127	0.207912	-3.25679	0.00112678	0.0187882
Ndufa11	468.053	0.596158	0.183153	3.25497	0.00113403	0.0188589
Cacfd1	449.034	-0.67003	0.206064	-3.25156	0.00114773	0.0190615
Gfod1	960.569	-0.619416	0.190677	-3.24851	0.0011601	0.0192414
Adamts18	615.779	-0.532844	0.164121	-3.24665	0.00116773	0.0193423
Actg2	58.462	-0.877181	0.270243	-3.2459	0.0011708	0.0193676
Trim23	923.487	0.505784	0.155874	3.24483	0.0011752	0.0194148
Wdr25	320.732	-0.703652	0.216936	-3.24359	0.00118033	0.0194738
F8	225.606	0.654161	0.201763	3.24223	0.00118597	0.0195412
Rbm7	678.526	0.544342	0.167949	3.24111	0.00119065	0.0195724
Ssbp3	4728.26	-0.512769	0.158212	-3.24103	0.00119099	0.0195724
Mat1a	22.0254	0.891705	0.275364	3.23828	0.00120254	0.0197106
Kif1c	966.76	-0.508905	0.157204	-3.23722	0.00120702	0.0197325
Gm11042	19.0898	0.844378	0.260897	3.23645	0.00121027	0.0197341
Ush2a	94.7904	-0.807108	0.249358	-3.23674	0.00120903	0.0197341
Ubtd1	408.717	-0.69369	0.214464	-3.23452	0.00121846	0.0198419
Frmpd1	505.758	-0.609927	0.188663	-3.23289	0.00122547	0.0199302
Ckap4	798.195	-0.529146	0.163877	-3.22891	0.00124261	0.0201306
Slfn14	42.8576	0.898334	0.278549	3.22505	0.00125952	0.0203783
Pex14	868.111	-0.546712	0.169627	-3.22302	0.00126845	0.0204963
Cnnm2	466.587	-0.576397	0.178865	-3.22252	0.00127067	0.0205057
Tbc1d16	555.218	-0.61924	0.192279	-3.22053	0.00127954	0.0205958
Adamtsl1	2437.05	-0.510476	0.158619	-3.21825	0.00128976	0.0207121
Dennd3	102.634	-0.792242	0.246197	-3.21792	0.00129124	0.0207121
Fbrsl1	624.386	-0.625208	0.194296	-3.21781	0.00129172	0.0207121
Ccl27a	47.3224	-0.891186	0.276987	-3.21743	0.00129346	0.0207136
Polr3k	514.407	0.558811	0.173746	3.21625	0.00129876	0.0207718
Trim72	56.953	0.863475	0.268509	3.21581	0.00130078	0.0207776
Lima1	436.155	-0.589742	0.183589	-3.2123	0.00131677	0.0209796
Gm3727	10.8472	0.785034	0.24444	3.21157	0.00132014	0.0210066
Mnt	116.026	-0.771416	0.240599	-3.20624	0.00134484	0.0213725
Clip3	194.567	-0.776123	0.242594	-3.19927	0.00137776	0.0218403
Gm14420	1146.81	-0.51045	0.15967	-3.1969	0.00138913	0.0219374
Tmem178	258.281	-0.726498	0.227304	-3.19614	0.00139278	0.0219674
Scarf2	285.459	-0.630807	0.197406	-3.19548	0.00139598	0.0219902
Madd	196.512	-0.667411	0.208915	-3.19465	0.00140001	0.0220044
Myadm	1303.71	-0.55494	0.173713	-3.19457	0.00140039	0.0220044
Kctd16	907.206	-0.570428	0.178591	-3.19405	0.00140292	0.0220166
Ambra1	2138.61	-0.560211	0.175462	-3.19278	0.00140911	0.022086
Hba-x	4954.34	0.594818	0.186372	3.19157	0.00141502	0.022151
Bfsp1	55.8088	-0.866288	0.271722	-3.18814	0.00143189	0.0222663
Lphn1	518.216	-0.67067	0.210316	-3.18887	0.00142831	0.0222663
Nhsl2	2484.14	-0.561445	0.176051	-3.1891	0.00142718	0.0222663
Tgfb1i1	430.372	-0.658657	0.206596	-3.18814	0.0014319	0.0222663
Tmem43	483.811	0.565887	0.177439	3.18919	0.00142674	0.0222663
Kif5c	255.845	-0.638836	0.200905	-3.1798	0.00147379	0.0227585
Ahsa2	341.807	0.665745	0.209553	3.17698	0.00148817	0.022917
Gria4	379.853	0.563644	0.177424	3.17682	0.00148901	0.022917
Tet3	1865.34	-0.613757	0.193205	-3.17671	0.00148954	0.022917
Stxbp1	592.609	-0.596319	0.187952	-3.17273	0.00151014	0.0232054
Cox7c	1644.96	0.531804	0.167654	3.17203	0.00151376	0.0232327
Dbr1	200.929	0.657522	0.207349	3.17108	0.00151871	0.0232801
Vav2	860.11	-0.547584	0.172802	-3.16886	0.0015304	0.0234307
Ndufb9	1189.83	0.526799	0.166282	3.16812	0.0015343	0.0234331
Uchl1	439.819	0.54518	0.172065	3.16846	0.00153249	0.0234331
Pip5k1c	317.44	-0.673394	0.212703	-3.16588	0.00154612	0.023585
Rptor	2433.23	-0.5431	0.171585	-3.16519	0.0015498	0.0236123
Notch1	772.611	-0.534918	0.169149	-3.1624	0.00156473	0.0237819
Ccdc61	225.254	-0.651335	0.206378	-3.15603	0.00159933	0.0242097
Rxra	852.785	-0.561337	0.177849	-3.15625	0.00159813	0.0242097
Igfbp7	242.452	-0.711081	0.225466	-3.15382	0.00161146	0.0243154
Ermap	142.868	0.774651	0.24589	3.15039	0.00163052	0.0244852
Zhx2	759.08	-0.567562	0.180218	-3.14931	0.00163654	0.0245461
Nox1	52.2549	-0.877153	0.278763	-3.1466	0.00165182	0.0247458
Aunip	94.5485	-0.77699	0.247221	-3.14289	0.00167288	0.0249866
Gtf2ird1	2003.89	-0.552773	0.175929	-3.14202	0.00167786	0.0249866
Rgs10	303.846	0.592514	0.188553	3.14242	0.00167557	0.0249866
Stom	598.28	0.550996	0.175348	3.1423	0.00167626	0.0249866
Gm10073	55.5993	-0.864826	0.27532	-3.14117	0.00168276	0.0250013
Slc40a1	302.717	0.650962	0.207236	3.14115	0.00168284	0.0250013
Rhoj	1217.23	-0.549977	0.175124	-3.1405	0.00168662	0.0250278
Gabra2	44.5886	0.866643	0.276087	3.13902	0.00169514	0.0250949
Cblb	3518.31	-0.512733	0.163625	-3.13359	0.0017268	0.0254467
Rps2-ps6	514.987	0.589801	0.188221	3.13356	0.00172702	0.0254467
Ppp1r14c	6387.81	-0.509083	0.162596	-3.13097	0.00174233	0.025582
Pacs1	1265.25	-0.564518	0.180361	-3.12993	0.00174847	0.0256123
Vps37b	476.435	-0.562741	0.179792	-3.12995	0.00174835	0.0256123
Lrrc8c	2029.27	-0.519235	0.165944	-3.12898	0.00175415	0.0256655
Cacna1a	146.804	-0.775087	0.24806	-3.12459	0.0017805	0.0259601
Prrx1	881.277	-0.601061	0.192404	-3.12394	0.00178444	0.0259858
Fgf10	60.2663	-0.836976	0.26806	-3.12235	0.00179415	0.0260682
Tubb1	85.9069	0.847367	0.271447	3.12167	0.0017983	0.0260982
Ap5m1	666.639	0.513237	0.164517	3.11965	0.00181066	0.0261867
Mink1	432.178	-0.620031	0.198748	-3.11969	0.0018104	0.0261867
Plekhg3	570.149	-0.550382	0.176389	-3.12027	0.00180687	0.0261867
Mmp14	1033.38	-0.501341	0.160816	-3.11749	0.00182401	0.0263493
Edem1	577.896	-0.509059	0.163339	-3.11659	0.00182958	0.0263994
Gde1	676.845	0.510403	0.163849	3.11508	0.00183897	0.0265044
Kctd12	206.535	-0.707927	0.227561	-3.11093	0.00186501	0.0268291
Sobp	882.948	-0.557108	0.179088	-3.11081	0.00186578	0.0268291
Ndufa4	2244.73	0.523723	0.16851	3.10797	0.0018838	0.0269953
Pld5	685.993	-0.51639	0.166138	-3.10819	0.00188238	0.0269953
Iqsec2	417.372	-0.603487	0.194232	-3.10705	0.00188966	0.0270484
Ppard	237.394	-0.760697	0.244862	-3.10663	0.00189232	0.0270556
Amd2	770.144	0.549132	0.176798	3.10598	0.00189648	0.0270843
Mtcp1	521.297	0.531735	0.171245	3.10511	0.00190209	0.0271335
Phyh	818.931	0.517827	0.166889	3.10283	0.00191682	0.0273126
Spc25	585.974	0.559444	0.180521	3.09906	0.00194139	0.0276311
Nfatc1	1187.83	-0.581633	0.187834	-3.09652	0.00195806	0.0278369
Clec16a	1493.64	-0.554508	0.179171	-3.09485	0.00196914	0.027868
Slc8a3	218.827	-0.631389	0.204007	-3.09494	0.00196852	0.027868
Cog5	1511.6	-0.567681	0.183614	-3.0917	0.00199014	0.0281018
Col8a1	216.653	-0.633225	0.204799	-3.09193	0.0019886	0.0281018
Tspan13	656.63	0.507981	0.164345	3.09094	0.00199526	0.0281424
Bahcc1	235.536	-0.700127	0.226876	-3.08595	0.00202901	0.0285221
Fbxo42	978.266	-0.522717	0.169427	-3.08521	0.00203411	0.02854
Sos2	1412.08	-0.515916	0.167228	-3.0851	0.00203483	0.02854
Col15a1	160.414	-0.686366	0.222576	-3.08373	0.00204421	0.0286395
1300017J02Rik	65.9749	0.812652	0.263675	3.08202	0.00205599	0.028643
Brip1	630.192	-0.52449	0.170132	-3.08284	0.00205038	0.028643
Rtn4rl1	563.504	-0.62136	0.201557	-3.0828	0.00205062	0.028643
Mical3	4029.47	-0.536521	0.174225	-3.07947	0.00207367	0.028763
Nuak1	1165.57	-0.538657	0.174902	-3.07976	0.00207164	0.028763
Xrcc2	318.759	0.571084	0.185494	3.07872	0.00207891	0.0288039
Mpp2	252.55	-0.698594	0.226984	-3.07772	0.00208588	0.0288685
Taok3	471.196	-0.64519	0.209714	-3.07652	0.0020943	0.0289189
Vangl2	391.021	-0.614376	0.199718	-3.07622	0.00209644	0.0289189
Dars2	453.891	0.527984	0.171802	3.0732	0.00211775	0.0291167
Lyrm7	114.54	-0.739753	0.240804	-3.07201	0.00212621	0.0291651
Rai1	3866.94	-0.518485	0.168811	-3.0714	0.00213057	0.0291651
Slc9a5	116.891	-0.726709	0.236588	-3.07163	0.00212894	0.0291651
Gm6768	1465.56	0.500688	0.163141	3.06905	0.00214739	0.0292853
Trim25	472.726	-0.535307	0.174415	-3.06916	0.00214658	0.0292853
Ppp1r1a	394.16	0.553759	0.180531	3.06739	0.00215937	0.0293988
Fpgt	216.38	0.634225	0.206947	3.06468	0.00217905	0.0296346
Ddc	337.614	-0.575288	0.187906	-3.06158	0.00220175	0.0298949
Dync1i1	257.133	-0.626834	0.204753	-3.06141	0.00220296	0.0298949
Kazn	412.584	-0.607387	0.198522	-3.05955	0.0022167	0.0300488
Fam184b	33.5227	-0.85384	0.27916	-3.05861	0.00222368	0.0301109
Slc9a1	548.989	-0.62244	0.203564	-3.05771	0.00223036	0.0301688
Slc17a5	397.165	-0.539811	0.176576	-3.05711	0.00223483	0.0301967
Samd12	211.847	-0.628215	0.205633	-3.05503	0.0022504	0.0303744
Khsrp	558.454	-0.591897	0.193938	-3.05199	0.00227327	0.0305843
St3gal3	1044.73	-0.559979	0.18357	-3.0505	0.00228461	0.030671
Pak3	443.568	0.52632	0.172622	3.04898	0.00229622	0.0307281
Tmem104	131.56	-0.79546	0.260882	-3.04912	0.00229514	0.0307281
A530054K11Rik	463.804	-0.549944	0.180447	-3.04767	0.00230621	0.0308236
Tpcn1	368.602	-0.677424	0.222295	-3.0474	0.00230827	0.0308236
Ppm1h	582.059	-0.563837	0.185092	-3.04625	0.00231718	0.0308939
Lrfn2	153.02	-0.700757	0.230197	-3.04416	0.00233332	0.0310589
Ppp1r17	502.993	0.507488	0.16681	3.04231	0.0023477	0.0311841
Tulp3	423.2	-0.569915	0.18732	-3.04247	0.00234646	0.0311841
Zbtb33	255.569	-0.601401	0.197805	-3.04038	0.00236283	0.0313519
Dagla	95.9829	-0.781165	0.25697	-3.03991	0.00236648	0.0313619
Zfp952	360.145	0.582553	0.191751	3.03807	0.00238102	0.0314932
Ndufa7	757.966	0.511768	0.168597	3.03546	0.00240168	0.0316997
Cisd3	94.0062	0.74733	0.246543	3.03124	0.00243554	0.0320593
Gabbr1	460.694	-0.559324	0.184528	-3.03111	0.0024366	0.0320593
Srp14	552.023	0.514533	0.169798	3.03026	0.00244342	0.0320595
Thrb	358.277	0.562625	0.185692	3.02989	0.00244645	0.0320595
Tspan9	3154.28	-0.525428	0.173388	-3.03036	0.00244266	0.0320595
Twist2	110.992	-0.732817	0.241867	-3.02984	0.00244684	0.0320595
C330018D20Rik	325.563	0.57922	0.191201	3.02938	0.00245055	0.0320745
Ap3b2	454.946	0.558629	0.18448	3.02813	0.0024607	0.0321629
Fcho2	1602.49	-0.523214	0.172797	-3.02792	0.00246243	0.0321629
Hcn4	1005.44	-0.542032	0.179065	-3.02701	0.00246985	0.0322263
Atf3	287.849	0.588334	0.194385	3.02665	0.00247284	0.0322317
Gm14399	599.625	0.517001	0.170839	3.02624	0.00247615	0.0322399
AU040320	122.883	-0.695149	0.229942	-3.02315	0.00250155	0.0324709
BC034090	727.954	-0.51455	0.170251	-3.0223	0.00250863	0.0324955
Farp1	4781.15	-0.509407	0.168712	-3.01939	0.00253288	0.0326747
Lamtor4	203.654	0.648557	0.214893	3.01805	0.00254408	0.0327854
Ell	457.916	-0.609871	0.202106	-3.01758	0.00254806	0.032803
Kdm2b	498.147	-0.580799	0.192568	-3.01606	0.00256079	0.0328993
Src	653.793	-0.579822	0.192493	-3.01218	0.00259383	0.0332897
Mov10	689.272	-0.512963	0.170395	-3.01043	0.00260874	0.0334468
Timm8b	239.31	0.622474	0.206822	3.0097	0.00261502	0.0334931
Grik5	501.835	-0.66445	0.220831	-3.00886	0.00262231	0.0335522
Pak4	591.996	-0.59338	0.197245	-3.00835	0.00262675	0.0335747
Hemgn	22.3869	0.824313	0.274178	3.00648	0.00264288	0.0337122
Itih3	52.3711	0.8146	0.270938	3.00659	0.00264195	0.0337122
Carm1	686.485	-0.574918	0.191371	-3.00421	0.00266273	0.0338964
Mef2d	1139.71	-0.54431	0.18125	-3.00309	0.00267255	0.0339525
Thg1l	192.895	0.634124	0.211274	3.00143	0.00268713	0.0341032
Tbx3	343.415	-0.603401	0.201156	-2.99966	0.00270281	0.0342328
Zfp518a	947.562	0.50075	0.167081	2.99706	0.00272601	0.0344224
Pnpla6	466.663	0.509976	0.170322	2.9942	0.00275169	0.0347117
Sik3	2824.53	-0.508024	0.170019	-2.98804	0.00280776	0.0352065
Stambpl1	126.416	-0.695233	0.232659	-2.9882	0.00280623	0.0352065
Arhgef10l	499.241	-0.652177	0.218448	-2.9855	0.00283114	0.0353935
Gm4944	335.239	0.586252	0.196541	2.98285	0.00285577	0.0355244
Gpc4	925.176	-0.516221	0.173049	-2.98309	0.00285349	0.0355244
Zfp605	132.983	0.685214	0.229802	2.98176	0.00286599	0.035616
Fgd5	686.865	-0.550845	0.184794	-2.98086	0.00287444	0.0356857
Mpzl2	12.7729	0.751722	0.252345	2.97895	0.0028924	0.0358378
Ptms	500.955	-0.600711	0.202144	-2.9717	0.00296154	0.0364782
Nfix	320.773	-0.783568	0.263757	-2.9708	0.0029703	0.0365501
Pla2g7	165.567	0.678942	0.2288	2.9674	0.00300327	0.0368834
A730017C20Rik	44.7596	-0.823337	0.277634	-2.96555	0.00302143	0.0370258
Cntn3	169.662	0.640365	0.215995	2.96472	0.00302962	0.0370258
Tuft1	238.738	-0.589947	0.198976	-2.96491	0.00302773	0.0370258
Uqcr10	847.384	0.519443	0.175239	2.96419	0.00303482	0.0370532
Snrpd2	554.714	0.505067	0.170488	2.96248	0.0030517	0.037223
Cep164	533.434	-0.52325	0.176667	-2.96179	0.00305854	0.0372701
Esr1	773.685	-0.52945	0.178792	-2.96127	0.00306374	0.0372973
Tnfaip8	852.135	-0.506071	0.170942	-2.96048	0.00307164	0.0373572
Ism1	108.323	-0.712505	0.241152	-2.95459	0.00313082	0.0379665
Cacna1d	10830.6	-0.532099	0.180257	-2.95189	0.00315835	0.0381433
Ebf2	231.738	-0.600646	0.203722	-2.94836	0.00319461	0.0384499
Tspan18	2361.93	-0.558296	0.189362	-2.94831	0.00319521	0.0384499
Tfeb	247.195	-0.671323	0.227734	-2.94784	0.00320005	0.0384712
Asns	306.428	0.573944	0.194935	2.94429	0.00323701	0.0388038
2310022A10Rik	195.805	-0.666762	0.226822	-2.93959	0.00328647	0.0392842
Epb4.2	173.415	0.712231	0.242356	2.93878	0.00329504	0.0393491
Glrx2	288.51	0.559603	0.190536	2.937	0.00331405	0.0395384
Coro2b	315.594	-0.654978	0.223058	-2.93636	0.00332088	0.0395531
Sstr5	25.9838	0.816847	0.278315	2.93497	0.00333582	0.0396473
BC024978	26.1449	-0.7978	0.271853	-2.93467	0.00333902	0.0396477
Mrps22	332.238	0.576493	0.196558	2.93295	0.00335758	0.0397927
Nxn	1971.56	-0.500044	0.170706	-2.92927	0.00339759	0.0401153
Pvrl1	97.2481	-0.762352	0.260232	-2.92951	0.00339502	0.0401153
Nfatc4	314.59	-0.567512	0.193774	-2.92873	0.00340344	0.0401336
Nphp4	120.018	-0.708885	0.242441	-2.92395	0.00345618	0.0405778
Fgfr1	708.416	-0.539425	0.184507	-2.9236	0.00346014	0.0405862
Pik3ip1	160.272	0.642201	0.219842	2.92119	0.00348693	0.0407163
Smpd2	107.827	0.741205	0.253752	2.92098	0.00348935	0.0407163
Ccdc6	1992.29	-0.507645	0.173882	-2.91947	0.00350622	0.0408213
Srcap	1321.1	-0.591178	0.202679	-2.91682	0.00353616	0.0410286
Aqp4	423.336	0.541758	0.185857	2.91493	0.00355774	0.0412296
Fbxl22	260.909	0.59152	0.203097	2.91251	0.0035854	0.0415118
Arsg	296.081	-0.568864	0.195344	-2.91212	0.00358988	0.0415254
1810037I17Rik	388.26	0.550736	0.189238	2.91028	0.00361108	0.0417321
Srgap1	2990.6	-0.509966	0.175506	-2.90569	0.00366444	0.0422708
Ephb3	484.893	-0.505486	0.174513	-2.89656	0.0037728	0.0432424
Rusc2	225.554	-0.615208	0.212385	-2.89666	0.00377159	0.0432424
Mrpl18	512.152	0.524507	0.181115	2.89598	0.00377975	0.0432824
Arhgdib	396.994	0.51104	0.176725	2.89172	0.00383137	0.0438335
Zfp386	784.947	0.500543	0.173158	2.89068	0.0038441	0.0439391
Vamp8	307.361	0.547974	0.189592	2.89029	0.00384892	0.0439541
Prosc	582.224	0.511059	0.176916	2.88871	0.00386826	0.0441348
Mdga2	305.39	0.564392	0.195538	2.88635	0.00389738	0.0444172
Hhipl1	15.0938	-0.754784	0.261719	-2.88395	0.00392726	0.044686
Furin	465.687	-0.614477	0.213229	-2.88177	0.00395448	0.0449329
Pacrg	69.7259	-0.751729	0.261212	-2.87785	0.00400401	0.0452717
Abcb1b	74.9301	0.740001	0.25728	2.87625	0.00402433	0.0453381
Col2a1	184.785	-0.618587	0.215067	-2.87625	0.00402435	0.0453381
Kdm6b	175.072	-0.695428	0.241756	-2.87657	0.00402024	0.0453381
P4ha3	443.024	-0.586885	0.204167	-2.87453	0.00404629	0.0454627
S100a1	156.367	0.642747	0.223566	2.87498	0.00404047	0.0454627
Zfp385a	45.7547	-0.801695	0.279263	-2.87075	0.00409499	0.0458866
Anpep	93.617	-0.720443	0.251	-2.87029	0.00410091	0.0459119
Lox	415.397	-0.500239	0.174438	-2.86772	0.00413443	0.0462418
Tmem63a	261.029	-0.567597	0.197944	-2.86746	0.00413775	0.0462418
Cd320	176.294	0.646423	0.225934	2.86112	0.00422152	0.0468854
Cic	539.374	-0.58891	0.205961	-2.85933	0.00424541	0.0470784
Ppp2r2b	381.791	-0.582578	0.203928	-2.85678	0.00427968	0.047305
Riiad1	30.4595	-0.796724	0.278905	-2.85661	0.00428193	0.047305
Slc18b1	139.595	-0.661195	0.231416	-2.85717	0.00427439	0.047305
Sema3f	130.333	-0.690252	0.242034	-2.85188	0.0043462	0.0478043
Hdx	416.963	-0.517835	0.181657	-2.85062	0.00436341	0.0479096
Prox1	1163.11	-0.557273	0.195573	-2.84944	0.00437956	0.048023
Hpgd	245.504	0.584497	0.205203	2.84838	0.00439427	0.0480801
Pxn	574.359	-0.541273	0.190124	-2.84694	0.00441412	0.0481711
Kcnh1	686.187	-0.522008	0.183622	-2.84284	0.00447138	0.0486267
Cdkn1a	105.872	-0.714019	0.251816	-2.83548	0.00457572	0.0495038
Ccdc85c	197.411	-0.681625	0.240485	-2.83437	0.00459159	0.0496327
Cdca3	339.51	0.525299	0.185451	2.83256	0.00461775	0.0498725
Zfp429	49.1932	-0.773987	0.27329	-2.8321	0.00462428	0.0499001

## Sheet: E14.5
Gene	baseMean	log2FoldChange	lfcSE	stat	pvalue	padj
Gm21887	3618.09	-3.9656	0.168428	-23.5448	1.41815e-122	1.7995e-118
Erdr1	6199.89	-3.65244	0.16004	-22.822	2.77253e-115	1.75903e-111
Gm3173	1534.14	3.74761	0.180379	20.7764	7.0794e-96	2.99435e-92
Gm2237	1696.66	3.48737	0.177294	19.67	3.90009e-86	1.23721e-82
Lmntd1	383.68	4.71561	0.251174	18.7743	1.22532e-78	3.1096e-75
Snx14	260.845	4.72664	0.270141	17.4969	1.51177e-68	3.19714e-65
Gm3194	1106.34	3.11102	0.188751	16.4821	4.93221e-61	8.94068e-58
Gm3020	889.645	3.18675	0.194002	16.4264	1.23804e-60	1.96368e-57
Gm3383	1148.39	3.0595	0.186642	16.3923	2.16965e-60	3.05897e-57
Gm3252	1237.39	2.94558	0.18107	16.2677	1.67423e-59	2.12443e-56
Gm3558	1543.91	2.91412	0.182052	16.0071	1.14082e-57	1.31599e-54
Gm3500	1536.99	2.92801	0.18649	15.7006	1.49869e-55	1.58474e-52
Gm3667	1421.85	2.86619	0.183127	15.6514	3.24954e-55	3.1718e-52
Gm2974	1489.43	2.82041	0.180896	15.5913	8.33772e-55	7.55695e-52
Gm3164	691.511	3.13415	0.202758	15.4576	6.70406e-54	5.67119e-51
Gm3739	964.102	2.89018	0.187065	15.4501	7.5318e-54	5.97319e-51
Gm10406	1292.75	2.86653	0.189145	15.1552	7.00278e-52	5.22696e-49
Gm3264	807.271	2.80085	0.189349	14.792	1.65029e-49	1.16336e-46
Gm3468	716.757	2.88695	0.195337	14.7794	1.99053e-49	1.32936e-46
Itgb3bp	166.953	4.0918	0.28011	14.6078	2.50296e-48	1.58801e-45
Gm3002	1278.11	2.69418	0.185235	14.5447	6.31414e-48	3.65452e-45
Gm3411	1542.03	2.56906	0.176635	14.5444	6.33615e-48	3.65452e-45
2610042L04Rik	734.476	2.90213	0.201672	14.3903	5.95113e-47	3.28321e-44
Gm2897	1055.2	2.62718	0.182986	14.3573	9.59256e-47	5.07166e-44
Gm3005	1014.15	2.61279	0.186971	13.9743	2.23726e-44	1.13554e-41
Gm8281	1177.25	2.47578	0.181636	13.6305	2.63801e-42	1.28745e-39
Gm2956	852.586	2.57553	0.190386	13.528	1.0694e-41	5.0258e-39
Gm5611	165.074	-3.64357	0.272558	-13.3681	9.29425e-41	4.21196e-38
Gm10409	453.324	2.98562	0.223632	13.3506	1.17523e-40	5.14226e-38
Gm5796	1125.93	2.3977	0.182437	13.1426	1.87643e-39	7.93667e-37
Gm3696	1390.36	2.30492	0.177945	12.953	2.25925e-38	9.24761e-36
Rps18-ps3	404.444	-2.67342	0.221141	-12.0892	1.20394e-33	4.77401e-31
Gnb1l	1075.52	-2.23777	0.187652	-11.9251	8.75829e-33	3.36769e-30
Glrb	482.717	2.48987	0.211095	11.795	4.14142e-32	1.5456e-29
Gm8108	883.276	2.25002	0.192022	11.7175	1.03648e-31	3.75769e-29
Gm3488	405.339	2.52397	0.216225	11.6729	1.75316e-31	6.17939e-29
Wnk3	98.5243	3.36219	0.290086	11.5903	4.61452e-31	1.58253e-28
Gm3248	232.213	2.7007	0.244246	11.0573	2.02103e-28	6.74866e-26
Gm8237	204.837	2.65025	0.246536	10.75	5.92671e-27	1.92831e-24
Gm14403	777.623	-1.84123	0.1867	-9.86198	6.08361e-23	1.92987e-20
Dis3l2	97.9672	2.88522	0.295909	9.75037	1.83796e-22	5.68827e-20
Rnaseh2a	75.5481	2.82483	0.293324	9.63041	5.94942e-22	1.79743e-19
Ctsk	156.726	2.33379	0.262582	8.88785	6.23014e-19	1.83847e-16
Tpm3-rs7	711.56	-1.80942	0.204528	-8.84681	9.00555e-19	2.59708e-16
Ifi44	77.1037	2.56078	0.291708	8.77856	1.65581e-18	4.66901e-16
Gm8730	797.015	1.80606	0.208918	8.64483	5.38835e-18	1.48637e-15
Gm3629	220.002	2.10401	0.250878	8.3866	5.00383e-17	1.35093e-14
Ubc	7678.34	-1.87571	0.226496	-8.28143	1.21705e-16	3.21733e-14
Zfp951	302.03	-1.80512	0.222656	-8.10722	5.17901e-16	1.34115e-13
Gm3239	217.411	1.93211	0.240709	8.02677	1.00075e-15	2.5397e-13
Hist1h2bj	226.813	-2.05736	0.259094	-7.94061	2.01184e-15	5.00553e-13
Stag3	131.843	2.05032	0.263161	7.79114	6.64063e-15	1.62044e-12
Gm10073	85.4098	-2.25761	0.290588	-7.76913	7.90294e-15	1.89208e-12
Gm13305	344.175	-1.77638	0.228905	-7.76036	8.46885e-15	1.99002e-12
Bcam	1163.68	-1.45872	0.18955	-7.69569	1.40737e-14	3.24693e-12
Gm3526	76.5865	2.20435	0.288371	7.64416	2.10319e-14	4.76561e-12
Alox8	45.7858	-2.25561	0.297079	-7.59263	3.13466e-14	6.9782e-12
Gm14443	66.6463	2.20893	0.292323	7.55648	4.14133e-14	9.06024e-12
Gm5786	411.208	1.68365	0.223283	7.54044	4.68379e-14	1.00733e-11
Dydc1	49.106	2.21094	0.29709	7.442	9.91688e-14	2.09725e-11
Hist1h2bm	246.394	-1.94596	0.262173	-7.42243	1.14992e-13	2.39203e-11
Clstn2	822.911	1.48321	0.199989	7.41645	1.20301e-13	2.4621e-11
Gm21092	8856.05	1.1399	0.154438	7.38092	1.57201e-13	3.16622e-11
H2-D1	224.611	-1.80668	0.247058	-7.31279	2.61655e-13	5.18773e-11
Hba-a1	5714.68	-1.30444	0.178685	-7.30024	2.87254e-13	5.60764e-11
Aste1	45.8514	-2.16129	0.296387	-7.29212	3.05106e-13	5.86589e-11
Hbb-bs	16217	-1.42109	0.195319	-7.27574	3.44536e-13	6.52511e-11
Lrrtm4	535.648	1.52031	0.210634	7.21779	5.28396e-13	9.86002e-11
Rnf17	248.569	1.65437	0.23052	7.1767	7.1412e-13	1.31326e-10
Hbb-bt	6817.68	-1.3699	0.192954	-7.09966	1.25063e-12	2.26704e-10
Hist1h4n	219.551	-1.72352	0.245779	-7.01249	2.34119e-12	4.18413e-10
Gm14410	2827.24	-1.12617	0.161377	-6.97851	2.98321e-12	5.25749e-10
2610305D13Rik	81.4759	1.99906	0.289726	6.89986	5.20551e-12	9.04832e-10
March1	473.619	1.46483	0.212585	6.89056	5.55733e-12	1e-09
Alad	601.049	-1.33118	0.19374	-6.87097	6.37652e-12	1.07734e-09
Gm3095	154.485	1.73988	0.253284	6.86928	6.45268e-12	1.07734e-09
4930447C04Rik	139.078	1.76422	0.258506	6.82468	8.81194e-12	1.45214e-09
Lipo1	389.508	1.40478	0.208495	6.7377	1.60909e-11	2.61766e-09
Dnah6	209.17	1.62591	0.242491	6.70505	2.01334e-11	3.23383e-09
Mkx	92.3595	1.87768	0.285264	6.58228	4.63297e-11	7.34847e-09
Aldh1b1	1828.9	-1.28485	0.197423	-6.50812	7.60977e-11	1.1921e-08
Lancl3	149.254	1.65127	0.254051	6.49975	8.04551e-11	1.24499e-08
Sspn	6078.05	-1.51836	0.235911	-6.43614	1.22548e-10	1.85121e-08
Uty	2322.88	1.33894	0.208002	6.43715	1.21738e-10	1.85121e-08
Gm3512	278.195	1.41542	0.22199	6.37607	1.81693e-10	2.71236e-08
Hist1h2br	486.785	-1.51608	0.238048	-6.36879	1.90522e-10	2.8e-08
Hist1h4m	159.302	-1.62323	0.25492	-6.36763	1.91975e-10	2.8e-08
Hist1h2bq	583.608	-1.45889	0.232979	-6.26188	3.80366e-10	5.48461e-08
Gm6483	2652.18	1.03116	0.165493	6.2308	4.64053e-10	6.61614e-08
Cdh20	491.587	1.29087	0.209245	6.16916	6.86521e-10	9.52632e-08
Cep70	396.06	1.26867	0.205623	6.16987	6.83472e-10	9.52632e-08
Gm10340	272.996	1.44058	0.23355	6.16821	6.90694e-10	9.52632e-08
Pcdh11x	1365.41	1.0746	0.174496	6.15829	7.35353e-10	1.00332e-07
Gm10251	45.2629	1.82093	0.297024	6.13059	8.75526e-10	1.18187e-07
Ifit2	188.642	1.51199	0.246763	6.12731	8.93784e-10	1.19381e-07
E030030I06Rik	111.715	-1.63574	0.268066	-6.10201	1e-09	1.38449e-07
Abca5	958.147	1.1928	0.196275	6.07717	1.22322e-09	1.6e-07
Efemp1	570.368	-1.29957	0.215732	-6.024	1.70157e-09	2.20318e-07
Gm10800	305.606	1.61066	0.268672	5.99491	2e-09	2.61e-07
Hist1h2bk	430.931	-1.44185	0.240584	-5.99314	2.05827e-09	2.61174e-07
Myl1	1084.53	-1.15749	0.194744	-5.94367	2.78717e-09	3.50163e-07
Capg	46.4413	1.74407	0.296786	5.87652	4.18988e-09	5.2123e-07
Nphp3	135.204	1.51111	0.257938	5.85843	4.67267e-09	5.73399e-07
Rp9	524.098	-1.13983	0.194594	-5.85747	4.69962e-09	5.73399e-07
Grip1	9695.91	1.21013	0.208407	5.80659	6.37593e-09	7.70516e-07
Gm13157	160.294	1.45316	0.250981	5.7899	7e-09	8.43069e-07
Unc13c	1468.37	-1.03029	0.17808	-5.78555	7.22738e-09	8.57086e-07
Hist1h2bn	404.641	-1.39181	0.241196	-5.77046	7.90548e-09	9.28821e-07
Ggnbp1	28.8558	1.67732	0.290834	5.76726	8.05684e-09	9.3792e-07
Rplp0	7825.97	-1.10567	0.19186	-5.7629	8.2683e-09	9.53786e-07
Crat	969.194	-1.11518	0.193758	-5.75555	8.63618e-09	9.87248e-07
Hbb-bh1	111.514	1.61434	0.280759	5.74991	8.92926e-09	1.01164e-06
Gm10801	118.225	1.57633	0.275473	5.72225	1.05122e-08	1.18044e-06
Hfm1	133.593	1.56788	0.274373	5.71439	1.1e-08	1.22549e-06
Fbln2	3657.29	-1.0141	0.177677	-5.70752	1.14635e-08	1.26487e-06
Uimc1	323.053	1.49115	0.26162	5.69969	1.2e-08	1.3129e-06
Gm10036	534.214	1.16485	0.204908	5.68475	1.31002e-08	1.42076e-06
Gm10128	107.49	1.5653	0.275608	5.67943	1.35141e-08	1.45322e-06
Il11ra2	254.89	-1.34916	0.238274	-5.66223	1.4942e-08	1.59327e-06
Alpk1	524.384	1.17326	0.207358	5.65813	1.53034e-08	1.61821e-06
Tnfrsf10b	189.783	1.36339	0.241924	5.63561	1.7444e-08	1.82931e-06
Zc3h7a	3367.43	-1.19531	0.212255	-5.63148	1.78674e-08	1.85836e-06
Hist1h2bl	405.583	-1.31213	0.23306	-5.63003	1.8e-08	1.85879e-06
Thnsl1	221.399	1.30622	0.232168	5.6262	1.8422e-08	1.88514e-06
Terf2ip	128.644	-1.62067	0.2884	-5.61954	1.91468e-08	1.94363e-06
Gm21738	173.933	1.56331	0.281823	5.54711	2.9e-08	2.92473e-06
Eno2	207.788	-1.33917	0.242457	-5.52332	3.32651e-08	3.32363e-06
Pygm	1500.87	-0.929606	0.1696	-5.48115	4.2256e-08	4.189e-06
Ptov1	526.551	-1.06848	0.195065	-5.47754	4.31275e-08	4.24221e-06
Usp14	2222.3	0.922575	0.169063	5.45699	4.84267e-08	4.72682e-06
Col6a3	2170.6	-0.923714	0.170746	-5.40987	6.30706e-08	6.10918e-06
Fhit	4052.34	0.924379	0.17144	5.39186	6.97319e-08	6.55428e-06
Gm3298	67.1209	1.55964	0.289122	5.39439	6.87556e-08	6.55428e-06
Rnf187	1022.12	-1.07214	0.198831	-5.3922	6.95987e-08	6.55428e-06
Trpm4	28.6225	1.55034	0.28752	5.39211	6.9635e-08	6.55428e-06
Msln	202.319	-1.42375	0.266141	-5.3496	8.81494e-08	8.22447e-06
Amph	141.836	-1.48055	0.277082	-5.34337	9.12324e-08	8.38876e-06
Rsph3b	811.6	-1.03035	0.192788	-5.34445	9.06897e-08	8.38876e-06
Rspo3	1258.22	1.01688	0.191054	5.32249	1.02354e-07	9.34369e-06
Pcdh9	7778.46	0.949808	0.178886	5.30956	1.09888e-07	9.95978e-06
Pdgfc	902.662	1.07239	0.20557	5.21663	1.82205e-07	1.63971e-05
Sel1l3	154.926	-1.38591	0.265985	-5.21048	1.88351e-07	1.68309e-05
Bmp5	527.495	1.02787	0.19772	5.19863	2.00766e-07	1.78148e-05
Upp2	359.981	1.12445	0.216367	5.19693	2.02603e-07	1.7853e-05
Fabp12	55.4864	1.52502	0.294207	5.18351	2.17747e-07	1.90551e-05
Hist1h2al	110.068	-1.46022	0.282301	-5.17254	2.30932e-07	2.00705e-05
Hist1h4k	196.243	-1.28205	0.249174	-5.14521	2.67217e-07	2.30661e-05
Eml6	357.185	1.08174	0.210539	5.13794	2.7777e-07	2.3815e-05
Olfr1033	23.781	1.46512	0.285529	5.13123	2.87849e-07	2.44921e-05
Slc40a1	393.068	1.07192	0.208945	5.13014	2.89527e-07	2.44921e-05
Zbtb8b	124.047	-1.33626	0.260569	-5.12823	2.92475e-07	2.45775e-05
Synpr	74.1918	-1.50446	0.294168	-5.11429	3.14916e-07	2.62893e-05
Hist1h4h	236.282	-1.24842	0.245933	-5.07627	3.84913e-07	3.19226e-05
Obscn	1557.07	-0.943196	0.185872	-5.07443	3.88659e-07	3.2024e-05
Gm20938	23.5122	-1.43993	0.284268	-5.06539	4.07556e-07	3.31505e-05
Rplp1	2317.81	-1.02367	0.202088	-5.06548	4.07374e-07	3.31505e-05
Kcnh7	5474.89	0.827533	0.164703	5.0244	5.05e-07	4.08151e-05
Fn3krp	219.744	1.15465	0.231175	4.9947	5.89277e-07	4.70273e-05
Sgcz	542.893	1.09289	0.21877	4.99562	5.86469e-07	4.70273e-05
Hist1h4j	172.894	-1.26678	0.254042	-4.98649	6.1485e-07	4.87614e-05
Smim1	218.44	-1.1703	0.234775	-4.98478	6.20311e-07	4.8889e-05
Hsd3b6	49.7534	1.47496	0.296702	4.97117	6.65512e-07	5.19182e-05
Plec	774.241	-0.927769	0.186646	-4.97075	6.66929e-07	5.19182e-05
Sept8	703.86	-0.982804	0.197765	-4.96955	6.71076e-07	5.19224e-05
Rps15	2378.55	-0.890178	0.179419	-4.96144	6.99725e-07	5.38109e-05
Fyco1	1816.2	0.875817	0.176688	4.95686	7.16411e-07	5.47623e-05
Cdh10	613.128	0.95866	0.193467	4.95517	7.22686e-07	5.49111e-05
Prss35	2688.01	0.800048	0.16257	4.92124	8.6e-07	6.49528e-05
Tatdn3	589.197	-1.01926	0.207391	-4.91468	8.89297e-07	6.67709e-05
Gm21598	22.2537	-1.38042	0.282254	-4.89072	1.00466e-06	7.49889e-05
Cyp2d22	109.829	-1.30167	0.266397	-4.8862	1.028e-06	7.58457e-05
Hapln1	1392.33	0.938073	0.191985	4.88618	1.02809e-06	7.58457e-05
Edil3	2112.61	0.813941	0.166763	4.88081	1.05649e-06	7.74902e-05
Abcc8	367.092	-1.06304	0.218541	-4.86425	1.14892e-06	8.24951e-05
Des	3220.97	-0.914437	0.187975	-4.86467	1.14646e-06	8.24951e-05
Gm8113	2793.22	0.821461	0.168775	4.86721	1.13185e-06	8.24951e-05
Sugct	320.138	-1.07616	0.221253	-4.86394	1.15073e-06	8.24951e-05
Oprk1	225.458	1.16563	0.240455	4.84759	1.2497e-06	8.90864e-05
4930578G10Rik	22.7181	1.35824	0.281745	4.82083	1.42965e-06	0.000101345
Ift57	374.902	1.01937	0.211739	4.81429	1.47727e-06	0.000104139
Psip1	527.593	1.0162	0.211215	4.81122	1.50015e-06	0.000105168
Hist2h2ac	57.2399	-1.40576	0.293501	-4.78963	1.67087e-06	0.000116492
Hist1h4a	238.868	-1.20213	0.251515	-4.77953	1.757e-06	0.000120513
Rpl36	695.737	-1.12148	0.234543	-4.78153	1.73966e-06	0.000120513
mt-Nd5	5466.29	0.765209	0.160078	4.78024	1.75086e-06	0.000120513
Hist1h4c	190.494	-1.19983	0.251222	-4.77597	1.78842e-06	0.000122007
Grn	520.343	-0.925692	0.193961	-4.77257	1.81894e-06	0.000122769
Tenm1	24.1261	1.36541	0.286059	4.77316	1.81358e-06	0.000122769
Pgam2	2020.12	-0.779792	0.163696	-4.76366	1.90113e-06	0.000127637
Psmc3ip	92.6137	-1.34739	0.283029	-4.76063	1.92993e-06	0.000128889
Dnah8	284.566	-1.0397	0.218692	-4.75419	1.99247e-06	0.000132369
Hist1h2bp	119.024	-1.30018	0.274369	-4.73882	2.14965e-06	0.000142067
Oplah	444.515	-1.02428	0.216271	-4.7361	2.17867e-06	0.000142501
Pla2g4c	20.9248	1.33089	0.280955	4.73703	2.1687e-06	0.000142501
Gm14420	1528.49	-0.797141	0.168417	-4.73315	2.21057e-06	0.000143846
Cpa3	81.4047	-1.35264	0.285877	-4.73155	2.22813e-06	0.000144249
Smg9	115.38	-1.25006	0.264572	-4.72484	2.303e-06	0.00014834
Plxnb2	1350.21	-0.804525	0.170499	-4.71866	2.374e-06	0.000152143
Cluh	1088.53	-0.898088	0.190664	-4.71032	2.47324e-06	0.000157703
Gaa	607.924	-0.897413	0.190579	-4.70887	2.491e-06	0.000158039
Gm2163	30.0516	1.36615	0.290263	4.7066	2.51888e-06	0.000159015
Pop4	517.146	-1.03747	0.221117	-4.69196	2.706e-06	0.000169981
Tex11	123.648	1.27354	0.271672	4.6878	2.76154e-06	0.000172617
Slc25a31	78.6105	1.32253	0.282274	4.68527	2.79591e-06	0.000173908
Gsg1l	421.373	0.962906	0.205698	4.68117	2.85247e-06	0.000176561
Adamtsl2	859.822	-0.914584	0.197392	-4.63334	3.59817e-06	0.000221637
Atp5d	692.47	-0.864867	0.187223	-4.61944	3.84784e-06	0.000235871
Gabrb2	534.599	0.926873	0.200989	4.61155	3.99672e-06	0.000243819
Hba-a2	6115.05	-0.80327	0.174515	-4.60287	4.167e-06	0.000252992
Mrap	37.2341	-1.35795	0.29704	-4.57161	4.84e-06	0.000291945
Tnni3k	3003.42	0.793374	0.173568	4.57097	4.85463e-06	0.000291945
Pgbd5	180.52	1.13194	0.248041	4.56349	5.03091e-06	0.000301119
Hspb1	811.387	-0.948529	0.208475	-4.54985	5.36847e-06	0.000319815
Hs3st4	734.229	1.06498	0.234593	4.53968	5.63386e-06	0.000334056
Papss2	466.06	0.935944	0.206569	4.53091	5.873e-06	0.000346619
Flnc	2672.63	-0.739195	0.163375	-4.52453	6.05289e-06	0.000355579
Mid1	2457.71	0.797241	0.176863	4.50768	6.55389e-06	0.000383237
Zfp280d	3201.46	0.731431	0.162317	4.5062	6.59987e-06	0.000384155
Slc6a17	237.628	-1.17462	0.26136	-4.49426	6.98111e-06	0.00040449
Kdm3a	3403.27	0.787407	0.175536	4.48574	7.26618e-06	0.000418004
Rps9	4525.22	-0.852638	0.190095	-4.48533	7.28024e-06	0.000418004
Prps2	901.683	0.82332	0.183796	4.47952	7.48116e-06	0.000427606
Aldh2	289.468	-0.971038	0.217234	-4.47	7.82187e-06	0.000445075
Crip2	1530.96	-0.890481	0.19938	-4.46624	7.9607e-06	0.00044704
Gpc1	927.066	-0.868975	0.194608	-4.46526	7.99733e-06	0.00044704
Mat1a	31.7841	1.31903	0.29528	4.46703	7.93121e-06	0.00044704
Trpm3	1686.59	0.828344	0.185502	4.46543	7.99094e-06	0.00044704
Glrx2	280.565	1.11772	0.250369	4.46431	8.03258e-06	0.000447041
Cct8	6118.98	-0.74854	0.167792	-4.46111	8.15372e-06	0.000451801
Ndrg4	1655.29	-0.789169	0.176937	-4.46017	8.18958e-06	0.000451816
Rpl23a	901.361	-0.956144	0.215044	-4.44627	8.73757e-06	0.000479961
Cdh8	346.204	1.02881	0.231649	4.44123	8.94463e-06	0.000489217
Tm4sf1	1280.53	-0.988381	0.222741	-4.43736	9.10674e-06	0.000495946
Tuft1	192.249	-1.09399	0.246607	-4.43618	9.15711e-06	0.000496558
Bai3	1392.19	1.05277	0.238438	4.41528	1.00879e-05	0.000542396
Usp16	1527.7	-0.746435	0.169055	-4.41532	1.00859e-05	0.000542396
Bend6	336.533	0.945054	0.214609	4.40361	1.06462e-05	0.000569997
D5Ertd579e	4107.71	0.713015	0.162201	4.39587	1.1033e-05	0.000588226
4930452B06Rik	888.258	0.809015	0.18413	4.3937	1.11435e-05	0.000589168
Rxfp1	2162.97	-0.779141	0.177325	-4.39386	1.11357e-05	0.000589168
Col3a1	41651.7	-0.77684	0.176946	-4.39027	1.13211e-05	0.000596073
Mdga1	211.753	-1.04097	0.237237	-4.38789	1.14457e-05	0.000600144
Retsat	302.375	-0.951333	0.21784	-4.36712	1.25897e-05	0.000657408
Abca6	180.485	-1.08736	0.25006	-4.34839	1.37139e-05	0.000710268
Pofut2	739.321	-0.903922	0.207862	-4.34866	1.36972e-05	0.000710268
Col6a1	1950.56	-0.747545	0.171956	-4.3473	1.37822e-05	0.000710903
Dct	56.4891	-1.28707	0.296233	-4.34478	1.39414e-05	0.000716206
Col16a1	656.715	-0.812457	0.187157	-4.34104	1.41809e-05	0.000725571
Hcn1	870.416	0.964829	0.222428	4.33772	1.43968e-05	0.000733657
Myl7	33497.2	-0.747898	0.172909	-4.32539	1.52263e-05	0.000772826
Serpina3g	45.9499	-1.2803	0.296093	-4.32397	1.53247e-05	0.000774719
Hist1h3b	310.203	-1.00487	0.232618	-4.31981	1.56166e-05	0.000786176
Stab1	1137.6	-0.811478	0.187886	-4.31898	1.56752e-05	0.000786176
Nt5dc2	685.542	-0.816203	0.189347	-4.31061	1.62804e-05	0.000813314
Gm13306	107.242	-1.16499	0.270852	-4.30121	1.69871e-05	0.000845293
Mlh1	828.293	-0.77191	0.17994	-4.28982	1.78815e-05	0.000886323
Ndufs5	551.195	-0.890207	0.207609	-4.28791	1.80362e-05	0.000890511
Cerk	464.046	-0.895863	0.209035	-4.28571	1.82156e-05	0.000895883
Gsap	387.352	0.890345	0.209185	4.25626	2.07879e-05	0.00101845
Sema3e	243.084	1.07821	0.253456	4.25404	2.09949e-05	0.00102463
Ddx3y	1838.72	0.986184	0.231915	4.25236	2.11528e-05	0.00102838
Hist1h1d	910.495	-0.98512	0.232714	-4.23317	2.3042e-05	0.0011075
Hist1h4d	315.906	-1.02568	0.242273	-4.23356	2.30023e-05	0.0011075
Uqcr10	1205.75	-0.881312	0.208168	-4.23366	2.2992e-05	0.0011075
Gm3453	24.7009	1.20366	0.285218	4.22014	2.44151e-05	0.00116907
Slc37a1	160.432	-1.03755	0.247603	-4.19036	2.78515e-05	0.0013286
Lbp	166.616	-1.02424	0.245001	-4.18057	2.90777e-05	0.0013819
Ccl27a	53.4411	-1.23288	0.294972	-4.17964	2.91975e-05	0.00138242
Col6a2	807.594	-0.791075	0.189423	-4.17623	2.96376e-05	0.00139803
Cttnbp2	821.856	0.801766	0.192301	4.16934	3.05485e-05	0.00143045
Mstn	241.885	0.944571	0.226552	4.16933	3.05502e-05	0.00143045
Eif2s3y	1479.28	0.981518	0.235518	4.16748	3.07986e-05	0.00143521
Tmeff2	296.996	1.09765	0.263422	4.16689	3.08781e-05	0.00143521
Epha7	6969.2	0.652649	0.156837	4.16132	3.16409e-05	0.0014653
Gpr137b	344.269	0.871641	0.209564	4.15931	3.19215e-05	0.00147292
Trim28	2024.97	-0.731738	0.176208	-4.15268	3.28599e-05	0.00151072
Gm3685	18.0452	1.14592	0.276008	4.15177	3.29907e-05	0.00151126
Lypd6	411.289	0.912749	0.219905	4.15066	3.31525e-05	0.00151321
Akt1	1947.84	-0.685267	0.165415	-4.14271	3.43224e-05	0.00156099
Lamb2	1229.96	-0.866607	0.209466	-4.13721	3.5155e-05	0.00159315
Gpr39	358.662	0.951498	0.230603	4.12613	3.68922e-05	0.00166002
Mmp14	1025.59	-0.73387	0.17783	-4.12681	3.67828e-05	0.00166002
Hist1h2bg	340.334	-1.03817	0.251744	-4.12389	3.7252e-05	0.00167029
Car2	313.992	-0.992133	0.241003	-4.11669	3.84354e-05	0.00171728
Eml1	1127.33	-0.712588	0.173255	-4.11294	3.9065e-05	0.00172716
Trim11	1352.16	-0.718056	0.174558	-4.11358	3.89569e-05	0.00172716
Zfpm2	16247.3	0.736744	0.179105	4.11348	3.89743e-05	0.00172716
Id3	531.917	-0.864869	0.210836	-4.10209	4.09431e-05	0.00180392
Klhl21	228.579	-0.95748	0.233719	-4.09671	4.19055e-05	0.00183993
Csmd3	309.101	0.888957	0.217109	4.09453	4.23034e-05	0.00184463
Lgi2	94.394	1.1384	0.278026	4.0946	4.22907e-05	0.00184463
Slc22a27	90.5485	-1.14541	0.280503	-4.0834	4.43807e-05	0.00192859
Gm4631	1811.56	-0.725627	0.177825	-4.08057	4.49251e-05	0.00194558
Gm13304	49.0393	-1.20472	0.295504	-4.07683	4.56531e-05	0.00196978
Rpl8	3771.79	-0.814813	0.1999	-4.07612	4.57943e-05	0.00196978
Gm10339	32.5754	1.18797	0.291561	4.07451	4.61104e-05	0.00197269
Smyd1	6182.43	-0.75839	0.186144	-4.0742	4.6173e-05	0.00197269
Ctnna2	5092.77	0.748477	0.183873	4.07062	4.68887e-05	0.00199655
Metap1d	467.25	0.822993	0.20258	4.06255	4.85385e-05	0.00205988
Obsl1	1301.11	-0.724629	0.178534	-4.05877	4.93322e-05	0.00208659
Sel1l2	28.047	-1.18988	0.293812	-4.04979	5.12631e-05	0.00216105
Lingo2	764.958	1.02879	0.254143	4.04808	5.16399e-05	0.00216973
Pcdh15	401.219	0.899253	0.222789	4.03635	5.42895e-05	0.00226682
Trps1	4245.97	0.641405	0.15891	4.03627	5.43079e-05	0.00226682
Rps3a1	10501.9	-0.778965	0.193294	-4.02994	5.57906e-05	0.00232107
Cpeb2	1272.87	0.752083	0.18666	4.02917	5.59749e-05	0.00232113
Postn	41656.1	-0.896755	0.223281	-4.01627	5.91271e-05	0.00244386
Vcp	3160.58	0.702444	0.174973	4.01459	5.95495e-05	0.00245333
Ephb4	1031.11	-0.746065	0.186114	-4.00864	6.10705e-05	0.00250784
Ercc6l2	1074.1	0.739022	0.184818	3.99865	6.37049e-05	0.00260758
Khdrbs2	592.966	1.00445	0.252472	3.97847	6.93596e-05	0.00282992
Nppa	1315.08	-0.954955	0.240123	-3.97695	6.9805e-05	0.00283027
Oprd1	114.043	1.05627	0.26565	3.97616	7.00375e-05	0.00283027
Pigs	327.195	-0.847662	0.213166	-3.97653	6.99283e-05	0.00283027
Drap1	371.732	-0.834686	0.210158	-3.97171	7.13594e-05	0.0028564
Ndufb8	448.213	-0.900086	0.226606	-3.97203	7.12619e-05	0.0028564
Olfr872	69.5688	1.14878	0.289189	3.97243	7.1143e-05	0.0028564
Slc25a39	499.443	-0.856669	0.215763	-3.97041	7.17489e-05	0.00286296
Slc1a5	177.467	-0.988804	0.249165	-3.96847	7.23369e-05	0.00287738
Efna5	8657.6	0.739492	0.186545	3.96414	7.36613e-05	0.0029209
Negr1	2919.76	0.723255	0.18254	3.96217	7.42726e-05	0.00293553
Pip5k1c	261.711	-0.88225	0.22275	-3.96072	7.47242e-05	0.00293553
Ptprm	8233.74	0.673035	0.169907	3.9612	7.45745e-05	0.00293553
Col1a2	7876.32	-0.649637	0.164256	-3.95502	7.65277e-05	0.0029971
Gm13225	240.461	0.894347	0.226227	3.95332	7.70741e-05	0.00300921
Gcnt1	986.611	-0.72313	0.183048	-3.9505	7.79895e-05	0.00303561
Zfhx4	962.748	0.893373	0.226279	3.94811	7.87704e-05	0.00305663
Nomo1	538.696	-0.806577	0.204481	-3.94451	7.99632e-05	0.00309345
L3hypdh	195.51	-0.947937	0.240771	-3.93709	8.24768e-05	0.00317136
Slc4a3	426.745	-0.828902	0.210516	-3.93747	8.23461e-05	0.00317136
Gm11808	1381.8	-0.849724	0.216063	-3.93275	8.39782e-05	0.00321933
Gas6	1446.71	-0.860504	0.219016	-3.92896	8.5313e-05	0.00324979
Gm2026	1654.04	-0.704871	0.179398	-3.92909	8.52678e-05	0.00324979
Ppm1m	154.146	-1.00006	0.254576	-3.92832	8.55409e-05	0.00324979
Vps26b	158.851	-0.981503	0.252274	-3.89062	9.99865e-05	0.00378725
Limd1	1442.7	-0.762218	0.195949	-3.88988	0.000100296	0.00378766
Acaa2	3107.15	-0.705885	0.181939	-3.87978	0.000104551	0.00393664
Lrfn5	95.8768	1.08089	0.278673	3.8787	0.000105018	0.00394254
Rbfox1	2993.58	0.738277	0.191022	3.86488	0.000111145	0.00416024
Bmp10	127.711	-1.03544	0.268288	-3.85943	0.000113651	0.00424152
H2-T22	155.961	-0.957219	0.248555	-3.85113	0.000117572	0.004375
Srp54a	1933.73	0.682121	0.177367	3.84582	0.00012015	0.00445786
Nipal4	296.034	0.856428	0.223027	3.84003	0.000123022	0.00453786
Tie1	1177.41	-0.730357	0.190166	-3.84063	0.000122721	0.00453786
Gon4l	1627.24	0.660049	0.172168	3.83375	0.000126205	0.0046418
Hist1h4f	150.948	-1.00278	0.261739	-3.83121	0.000127514	0.00467638
Gm5458	29.0353	1.11901	0.292186	3.82978	0.000128256	0.00469001
Calm3	1876.42	-0.742528	0.194074	-3.82601	0.000130239	0.00474886
Tagap1	284.857	-0.848498	0.222009	-3.82192	0.000132418	0.00481449
Adcy6	1290.9	-0.658037	0.17233	-3.81847	0.000134284	0.00484996
Pla2g4a	464.2	0.756059	0.198004	3.8184	0.000134321	0.00484996
Plvap	105.314	-1.02319	0.267992	-3.818	0.000134541	0.00484996
Tmem51	311.131	-0.850411	0.222866	-3.8158	0.000135742	0.0048794
Aldh16a1	203.736	-0.962898	0.252701	-3.81042	0.000138729	0.00497268
Wdr83	25.7614	1.09979	0.288948	3.80618	0.00014113	0.00504451
Tmc7	272.335	0.87858	0.230893	3.80514	0.000141722	0.00505143
Apoe	1842.17	-0.772118	0.203027	-3.80303	0.000142939	0.00508054
Csnk1g2	364.558	-0.806331	0.212382	-3.79661	0.000146688	0.00517426
Gm10338	19.6019	1.06192	0.279685	3.79685	0.000146544	0.00517426
Phb	892.995	-0.760912	0.200429	-3.79642	0.000146799	0.00517426
mt-Nd4	3499.71	0.838087	0.220845	3.79491	0.0001477	0.00519159
Spon2	651.477	-0.748295	0.197794	-3.7832	0.000154825	0.00542699
Gm14308	1862.84	-0.650385	0.17195	-3.7824	0.000155326	0.00542956
Gm3424	23.0238	1.08846	0.287958	3.77994	0.000156864	0.00543839
Gm3618	28.7412	1.11081	0.293825	3.78051	0.00015651	0.00543839
Pfkl	1641.36	-0.782729	0.207053	-3.78034	0.000156615	0.00543839
Gm14434	1469.62	-0.671874	0.178351	-3.76714	0.000165126	0.00570922
Fam169a	131.8	1.0883	0.289185	3.76332	0.000167673	0.00576587
Unc5d	411.133	1.0005	0.265854	3.76333	0.000167663	0.00576587
Cntn1	193.717	0.952139	0.253258	3.75956	0.000170215	0.00583746
Lap3	1131.41	-0.705973	0.188115	-3.75288	0.000174812	0.00597896
Sln	1431.13	-0.657512	0.17536	-3.7495	0.000177184	0.00602759
mt-Atp6	19169.2	0.586745	0.156472	3.74984	0.000176949	0.00602759
Adam22	1834.79	0.7365	0.196524	3.74763	0.000178512	0.0060339
Basp1	574.119	0.817562	0.218178	3.74723	0.000178796	0.0060339
Rpl26	4304.78	0.696632	0.185899	3.74737	0.0001787	0.0060339
Gm14288	688.2	0.696585	0.186021	3.74466	0.00018064	0.00607019
Ppp1r17	518.005	0.755466	0.201759	3.7444	0.000180828	0.00607019
Kcnj8	128.088	-0.989911	0.26452	-3.7423	0.000182345	0.00610497
Cyp4f13	146.47	0.941773	0.2521	3.73572	0.000187182	0.00623804
Dock6	483.983	-0.732467	0.19608	-3.73555	0.000187303	0.00623804
Ddx4	27.3087	1.09009	0.292036	3.73274	0.00018941	0.0062917
Gm6356	26.7601	-1.08595	0.291169	-3.72961	0.000191773	0.00634037
Uqcr11	891.852	-0.809556	0.217069	-3.72948	0.000191875	0.00634037
Gfra1	787.046	0.73929	0.198463	3.72508	0.000195256	0.00641088
Gm7876	20.6033	1.04659	0.280985	3.72473	0.000195524	0.00641088
Rpl37	2851.69	-0.687194	0.184486	-3.72491	0.000195381	0.00641088
Adprhl1	1141.86	-0.732246	0.196712	-3.72243	0.000197312	0.00643623
Lrrc9	135.906	0.969188	0.260343	3.72273	0.000197079	0.00643623
Eef2	13533.9	-0.613911	0.165026	-3.72008	0.000199159	0.00646325
Hist3h2ba	73.538	-1.05272	0.282983	-3.72009	0.000199148	0.00646325
Psma8	106.657	0.992757	0.267521	3.71095	0.000206479	0.00668371
Clec14a	871.813	-0.817883	0.220441	-3.71021	0.000207086	0.0066863
Ly6e	171.579	0.898439	0.242774	3.70072	0.000214991	0.00692392
Stard4	558.095	0.766482	0.207338	3.69677	0.000218362	0.00701467
Igf2	14529.1	0.58664	0.158861	3.69279	0.000221806	0.00710733
Rcn3	1481.81	-0.671331	0.181922	-3.69022	0.000224057	0.00716135
Zfp960	547.784	0.733299	0.198896	3.68684	0.000227054	0.00723892
Gm11007	1306.47	-0.684294	0.185684	-3.68525	0.000228475	0.00726595
Emilin1	607.173	-0.717033	0.194622	-3.68423	0.000229392	0.00727687
Snrnp35	222.184	-0.874761	0.237478	-3.68354	0.000230014	0.00727842
Lrp10	274.146	-0.837941	0.22759	-3.6818	0.000231591	0.00731008
Gm14440	690.658	0.683891	0.186135	3.67417	0.000238628	0.00751353
A530054K11Rik	596.568	-0.712113	0.194185	-3.66719	0.000245233	0.00758967
Angptl4	373.834	-0.813626	0.221832	-3.66776	0.000244686	0.00758967
Fam155a	1057.81	0.781982	0.213155	3.66861	0.000243873	0.00758967
Gnl1	175.728	-0.892525	0.243283	-3.66867	0.000243812	0.00758967
Hist4h4	239.629	-0.924367	0.251913	-3.6694	0.000243125	0.00758967
Mllt3	4042.47	0.633888	0.172812	3.66808	0.000244383	0.00758967
Smdt1	488.209	-0.745468	0.203208	-3.6685	0.000243978	0.00758967
Tceb2	742.232	-0.752842	0.205471	-3.66399	0.000248321	0.00766653
Cgn	67.383	-1.05396	0.287751	-3.66277	0.000249506	0.00767877
Slfn9	580.998	-0.739645	0.20196	-3.66233	0.000249928	0.00767877
Vwf	748.628	-0.725415	0.198132	-3.66127	0.000250969	0.00769213
Igfbpl1	200.183	-0.884011	0.241916	-3.65421	0.000257979	0.00786898
Palld	17899	0.601864	0.164679	3.65477	0.000257409	0.00786898
B3gntl1	599.348	0.691534	0.189298	3.65315	0.000259045	0.00788254
Pde3b	1070.34	0.65278	0.178754	3.65183	0.000260382	0.00788543
Sh3glb2	617.213	-0.734474	0.201119	-3.65193	0.000260278	0.00788543
Bhlhe40	203.944	0.869565	0.238354	3.64821	0.000264076	0.00797825
Spt1	13.8528	0.951799	0.260959	3.64731	0.000265002	0.00798721
Hist1h2bc	326.228	-0.888704	0.244009	-3.64209	0.000270435	0.00813164
Ctse	76.8336	-1.02403	0.281459	-3.63828	0.000274469	0.00823342
Atp1a1	10354.7	-0.561882	0.15447	-3.63748	0.000275322	0.00823954
Eef1a2	550.091	-0.727635	0.200812	-3.62346	0.000290688	0.00867892
Prdx5	461.314	-0.777015	0.215012	-3.61382	0.000301713	0.00898695
Mdk	772.976	-0.671783	0.186002	-3.61169	0.000304206	0.00903739
Ptgis	380.19	-0.803984	0.222639	-3.61116	0.000304831	0.00903739
Idh2	9513.65	-0.735556	0.204072	-3.60439	0.000312881	0.00925443
Ccdc162	26.1899	1.05459	0.292882	3.60074	0.000317309	0.00936358
Ndufb7	422.853	-0.800056	0.222391	-3.59752	0.00032127	0.00945845
Leprel2	530.496	-0.754619	0.21014	-3.59103	0.00032937	0.00967449
Dynlt1a	1138.8	0.702291	0.195727	3.58812	0.000333072	0.00976063
Col1a1	1372.64	-0.723757	0.201835	-3.58588	0.000335941	0.00981998
Ehmt2	635.048	-0.713483	0.19904	-3.58462	0.000337575	0.00981998
Rpl36-ps3	138.975	-0.998216	0.278501	-3.58424	0.000338062	0.00981998
Tnni1	11439.1	-0.701836	0.195817	-3.58414	0.000338193	0.00981998
Syt6	14.1788	0.92829	0.259068	3.58319	0.000339424	0.00983323
Syt14	438.331	0.767619	0.214359	3.581	0.000342277	0.00989329
2310067B10Rik	419.066	-0.729044	0.203923	-3.5751	0.000350094	0.0100733
Rps8	6838.38	-0.652196	0.182424	-3.57517	0.00035	0.0100733
Apeh	556.164	-0.745891	0.208767	-3.57284	0.000353137	0.0101379
Slc22a1	393.64	-0.763318	0.213805	-3.57017	0.000356751	0.0102186
1700029J07Rik	87.1381	-0.98669	0.276517	-3.56828	0.000359332	0.0102693
Gm14435	772.884	0.65028	0.182444	3.56427	0.000364875	0.0104043
Tnni3	5073.55	-0.668845	0.187914	-3.55931	0.000371837	0.010579
Morn2	51.9381	1.05445	0.29649	3.55646	0.00037589	0.0106704
Serpinh1	7610.8	-0.668645	0.188154	-3.55371	0.000379835	0.0107583
Arhgap6	11169.3	0.59817	0.168426	3.55153	0.000383001	0.0108238
Mdfi	175.835	-0.896728	0.252719	-3.54832	0.000387691	0.010932
Fabp3	2002.8	-0.760809	0.214576	-3.54565	0.000391652	0.0110192
Adat2	76.5037	1.01014	0.285064	3.54354	0.000394788	0.0110803
Npl	222.808	-0.840156	0.23713	-3.54302	0.00039557	0.0110803
Sidt2	616.803	-0.681103	0.192374	-3.54052	0.000399342	0.0111613
Acads	248.651	-0.89328	0.252445	-3.53852	0.00040238	0.0112215
Sh3pxd2b	1002.95	-0.67161	0.189899	-3.53667	0.000405213	0.0112758
Magi3	6201.35	0.577051	0.163266	3.53443	0.000408662	0.0113469
Jarid2	5875.24	-0.763271	0.2162	-3.53039	0.000414949	0.0114963
Stk10	231.759	-0.806551	0.22856	-3.52884	0.000417388	0.0115386
Bfsp1	53.4725	-1.03361	0.293116	-3.52628	0.000421441	0.0116001
Ccl25	557.672	0.747284	0.211897	3.52663	0.000420881	0.0116001
Col5a1	2589.92	-0.572877	0.162701	-3.52105	0.000429843	0.011771
Hist1h3e	126.063	-0.967581	0.274828	-3.52069	0.000430433	0.011771
Selenbp2	56.8372	-1.02905	0.292277	-3.52079	0.000430261	0.011771
Aifm2	121.88	-0.948522	0.269604	-3.5182	0.000434482	0.0118562
Aqp8	110.222	-1.00886	0.287098	-3.51398	0.000441447	0.0120204
Hist1h2be	425.829	-0.867071	0.246869	-3.51228	0.000444284	0.012046
Runx1t1	3177.36	0.720593	0.205162	3.51231	0.000444236	0.012046
Gm21103	18.6195	0.973898	0.277488	3.50969	0.000448625	0.0121377
Gltscr2	516.432	-0.743641	0.212031	-3.50722	0.00045281	0.0122249
Dsp	4540.57	-0.560377	0.160136	-3.49939	0.000466332	0.0125548
Lrch1	2096.97	0.627552	0.179352	3.499	0.000467009	0.0125548
Gbp5	28.1266	1.02881	0.2941	3.49815	0.000468489	0.012568
Zfp651	269.868	-0.768913	0.219916	-3.49639	0.000471597	0.0126247
Gm6576	148.313	0.901801	0.258173	3.49301	0.00047761	0.0127319
Tox3	1676.83	0.6449	0.184604	3.49342	0.000476871	0.0127319
Fmn2	98.2245	0.953582	0.273137	3.49122	0.000480815	0.0127637
Kdm5d	1094.57	0.812521	0.232722	3.49138	0.000480539	0.0127637
Hmga2	431.489	0.73319	0.210317	3.48612	0.000490079	0.0129825
Rabgap1l	6297.5	0.591847	0.16983	3.48494	0.000492255	0.013013
Col6a6	1532.09	0.71067	0.204277	3.47895	0.00050339	0.0132698
Mlf2	729.532	-0.640143	0.184069	-3.47773	0.000505685	0.0132698
Rpl9-ps6	406.553	-0.798109	0.229508	-3.47748	0.000506155	0.0132698
Rsbn1	956.106	0.647925	0.186301	3.47785	0.000505459	0.0132698
Brd2	1296.67	-0.607211	0.174905	-3.47165	0.000517267	0.0135332
Celsr1	279.189	-0.772597	0.222812	-3.46748	0.000525367	0.0137168
Notch1	823.134	-0.665682	0.19206	-3.466	0.000528257	0.013764
Cdh2	15753.7	0.565543	0.163279	3.46365	0.000532891	0.0138563
Lyrm7	109.177	-0.925399	0.267319	-3.46178	0.000536615	0.0139246
Lclat1	2881.61	0.572302	0.165361	3.46093	0.000538305	0.0139399
Paqr7	228.672	-0.825384	0.238708	-3.45771	0.000544792	0.0140792
Rims1	2152.09	0.583021	0.168728	3.45538	0.000549515	0.0141723
Ccrn4l	168.113	-0.845591	0.245183	-3.44881	0.000563063	0.0144923
Erc2	1672.64	0.715669	0.207679	3.44604	0.000568861	0.0146119
Fbxo6	96.161	-0.964054	0.279827	-3.44518	0.000570685	0.0146291
Srp54b	6142.59	0.57109	0.166099	3.43825	0.000585485	0.0149783
Srp9	568.966	0.71678	0.208575	3.43656	0.000589155	0.0150418
Itpr3	205.516	-0.817984	0.238216	-3.4338	0.000595189	0.0151654
Esd	1649.32	-0.632187	0.184313	-3.42997	0.000603648	0.0153288
Grm8	404.222	0.700123	0.204129	3.4298	0.000604019	0.0153288
Spaca1	26.719	1.00628	0.293486	3.42872	0.000606445	0.0153596
Kmt2e	2925.99	0.571084	0.166605	3.42778	0.000608544	0.0153821
Kctd8	1194.81	0.629956	0.184158	3.42073	0.000624529	0.0157548
Dkk3	2916.06	-0.568839	0.166408	-3.41834	0.000630035	0.0158621
Chpf	105.964	-0.923771	0.270425	-3.41599	0.000635498	0.015968
Gm8246	20.6014	0.969158	0.283872	3.41407	0.00064001	0.016028
Inppl1	1155.46	-0.607258	0.177878	-3.41389	0.000640414	0.016028
Prr16	270.078	0.814511	0.238772	3.41125	0.000646656	0.0161524
Lcp1	789.971	0.617681	0.181279	3.40734	0.000655987	0.0163533
E130114P18Rik	14.8919	0.904923	0.265727	3.40547	0.000660514	0.0164017
Thoc1	1649.94	0.616233	0.180933	3.40586	0.00065955	0.0164017
4930555G01Rik	53.455	0.996244	0.292682	3.40385	0.000664443	0.016438
Chit1	45.9615	-1.00549	0.295402	-3.40379	0.000664569	0.016438
Zfp808	1339.57	0.642506	0.188811	3.4029	0.000666744	0.0164597
Olfml3	509.226	-0.699039	0.205484	-3.40191	0.000669164	0.0164874
Ints1	225.71	-0.790281	0.232357	-3.40116	0.000671017	0.016501
Gpc3	10293.4	0.557696	0.164053	3.39948	0.000675138	0.0165703
Map1lc3a	345.381	-0.799588	0.235282	-3.39842	0.00067776	0.0166025
4833420G17Rik	961.156	-0.621465	0.18313	-3.39358	0.000689866	0.0168665
Tmem108	3980.29	0.620882	0.18304	3.39205	0.000693719	0.0168956
mt-Nd4l	317.338	0.882187	0.260038	3.39253	0.000692496	0.0168956
Chchd10	240.959	-0.780918	0.230659	-3.3856	0.000710218	0.0172643
Fndc1	624.679	-0.713606	0.210827	-3.38479	0.00071233	0.0172825
Gm9396	141.924	-0.913675	0.270056	-3.38329	0.000716241	0.0173442
E2f5	247.995	0.823074	0.243357	3.38216	0.000719181	0.0173583
Pdgfrb	942.361	-0.598293	0.176904	-3.38202	0.000719557	0.0173583
Lipo4	17.2807	-0.913596	0.270491	-3.37754	0.000731368	0.0176097
Lonp1	798.184	-0.667827	0.197839	-3.3756	0.000736546	0.0177008
Hbb-y	4127.45	0.656277	0.19446	3.37486	0.000738531	0.017715
Vps52	333.229	-0.712556	0.211195	-3.37392	0.000741061	0.0177421
Cst3	1913.89	-0.657234	0.194861	-3.37284	0.000743978	0.017745
Rpl41	5692.26	-0.622323	0.184492	-3.37317	0.000743083	0.017745
Aim2	252.327	0.784208	0.232673	3.37043	0.000750523	0.0178341
Xrn1	1734.6	0.618625	0.183518	3.37092	0.000749184	0.0178341
Arhgdib	319.71	0.757443	0.224802	3.36937	0.000753393	0.0178688
Rfx7	1200.65	0.667055	0.19818	3.36591	0.000762917	0.0180273
Zcwpw1	109.775	0.893917	0.265575	3.36596	0.000762769	0.0180273
Slc29a1	387.413	-0.808209	0.240206	-3.36465	0.00076641	0.0180762
Tmem259	248.343	-0.769699	0.228869	-3.36306	0.000770839	0.0181469
Galntl6	392.576	0.810601	0.241145	3.36147	0.000775283	0.0182177
Ehd1	567.687	-0.646114	0.192373	-3.35866	0.000783224	0.0183703
Serpina3a	12.0448	-0.84704	0.252323	-3.35697	0.000788022	0.0184487
Rabgef1	375.914	0.796669	0.237394	3.35589	0.000791096	0.0184866
Hist1h3f	156.481	-0.899518	0.268369	-3.3518	0.000802887	0.0187276
Hectd2	542.773	0.696782	0.208243	3.346	0.000819878	0.0190555
Irak1bp1	169.073	0.836833	0.250121	3.34571	0.00082071	0.0190555
Lnpep	3166.1	0.600893	0.179614	3.34546	0.000821448	0.0190555
Ddr1	791.213	-0.607894	0.181799	-3.34378	0.000826458	0.0191019
Lmna	363.407	-0.788517	0.235782	-3.34426	0.000825038	0.0191019
Acot2	399.172	-0.800954	0.239578	-3.34318	0.000828235	0.0191081
Mthfr	583.023	-0.650549	0.194683	-3.34158	0.000833045	0.0191842
Acat2	758.909	-0.648317	0.194271	-3.33718	0.000846338	0.019455
Cryab	1844.7	-0.587933	0.1763	-3.33484	0.000853495	0.0195135
Nvl	1356.09	0.565431	0.169548	3.33494	0.000853182	0.0195135
Unc5b	1404.52	-0.616995	0.185005	-3.33501	0.00085295	0.0195135
Serpina3i	17.7942	-0.923216	0.276958	-3.33341	0.000857876	0.0195784
Rsph3a	624.101	-0.627918	0.188516	-3.33085	0.000865815	0.0197241
1700001O22Rik	16.3759	-0.914588	0.274812	-3.32805	0.000874558	0.0198876
Sgcb	657.08	-0.630946	0.189752	-3.32512	0.000883815	0.0200621
Gria4	503.865	0.816548	0.245863	3.32115	0.00089648	0.0203133
1700109H08Rik	304.941	0.740045	0.222967	3.31907	0.000903174	0.0203737
Chrac1	282.07	-0.80229	0.241762	-3.31851	0.000904981	0.0203737
Isyna1	288.11	-0.750377	0.226048	-3.31954	0.000901656	0.0203737
Stk31	22.9636	0.961498	0.289753	3.31833	0.000905569	0.0203737
Aph1b	311.835	-0.774149	0.233572	-3.3144	0.000918407	0.0205895
Rps14	5458.03	-0.655935	0.197903	-3.31443	0.000918306	0.0205895
Malt1	1648.86	0.571045	0.172523	3.30996	0.0009331	0.020882
Kdm7a	928.298	0.645148	0.194942	3.30943	0.000934859	0.0208846
Cntn6	77.6461	0.957244	0.289407	3.30761	0.000940957	0.0209257
Gm11042	16.8024	0.906997	0.274247	3.30722	0.000942267	0.0209257
Kcnt2	910.445	0.641493	0.193931	3.30785	0.000940164	0.0209257
Parp1	1734.37	-0.588349	0.177915	-3.30691	0.000943295	0.0209257
Hist1h4i	169.545	-0.833526	0.252287	-3.30388	0.000953582	0.0211169
Vmn2r1	18.2754	0.926551	0.280875	3.2988	0.000970985	0.0214649
Rab18	1540.34	0.646764	0.196171	3.29695	0.000977414	0.0215694
Gm4724	1331.31	-0.587918	0.178548	-3.29276	0.000992075	0.0218264
Rarres2	66.6071	-0.972862	0.295465	-3.29264	0.000992499	0.0218264
1700112E06Rik	1963.1	0.642282	0.195245	3.28962	0.00100323	0.0219861
Ddah2	560.515	-0.682875	0.207569	-3.28987	0.00100235	0.0219861
Zgrf1	991.471	0.577147	0.175543	3.28779	0.00100978	0.0220916
Gas2	520.935	0.645964	0.196624	3.28528	0.00101883	0.0222511
Cxx1b	432.26	-0.702791	0.214039	-3.28347	0.00102539	0.0223282
Gm10076	1673.73	-0.619262	0.188608	-3.28333	0.00102588	0.0223282
Prkar2b	522.041	0.639296	0.194794	3.28191	0.00103106	0.0224026
Cd200r3	29.8923	0.968326	0.295292	3.27922	0.00104094	0.0224634
Igfbp4	1342.22	-0.584432	0.178217	-3.27933	0.00104053	0.0224634
Nenf	420.961	-0.734397	0.223879	-3.28033	0.00103684	0.0224634
Uqcrc1	1983.89	-0.610082	0.186013	-3.27979	0.00103885	0.0224634
Ppwd1	635.598	0.653304	0.199331	3.27749	0.00104735	0.0225633
Sympk	543.665	-0.658249	0.20114	-3.27259	0.00106569	0.0229195
Ndufa6	1120.31	-0.658444	0.201261	-3.27159	0.00106946	0.0229618
Cthrc1	352.456	0.693715	0.212137	3.27013	0.001075	0.0230416
Decr2	398.116	-0.71922	0.22025	-3.26547	0.00109281	0.0233839
Slc28a1	32.4056	0.965324	0.295974	3.26152	0.00110816	0.0236725
Nes	1824.41	0.555428	0.170563	3.25644	0.00112819	0.0240598
Kank4	515.966	0.674693	0.20728	3.25499	0.00113396	0.0241424
Gpr137c	465.652	0.646018	0.198698	3.25125	0.00114899	0.0244214
Ror2	1072.15	0.579547	0.178383	3.2489	0.00115854	0.0245831
Mogs	364.837	-0.741266	0.228377	-3.24579	0.00117124	0.0248112
Map9	311.447	0.752876	0.232179	3.24266	0.00118421	0.025044
Vwc2	234.876	0.82229	0.253638	3.24198	0.00118701	0.0250615
Casq1	2002.26	0.587086	0.181132	3.24121	0.00119025	0.0250881
Gm2007	1201.37	-0.600379	0.185561	-3.23548	0.00121438	0.0255543
Polg	361.481	-0.694526	0.21472	-3.23457	0.00121827	0.0255877
Rpl37a	4455.38	-0.658344	0.203559	-3.23416	0.00122	0.0255877
Timm13	219.069	-0.791288	0.244729	-3.23332	0.0012236	0.0256209
Agrn	1706.67	-0.538693	0.166648	-3.23251	0.00122706	0.0256282
Skiv2l	329.306	-0.765275	0.236759	-3.2323	0.00122799	0.0256282
Gsn	2125.12	-0.65919	0.203975	-3.23172	0.00123046	0.0256375
Mybpc1	86.5611	0.923501	0.285883	3.23035	0.00123639	0.025719
Pcmtd2	1453.61	0.550284	0.170576	3.22604	0.00125515	0.0260665
Cox7a1	349.25	-0.737115	0.228665	-3.22356	0.00126608	0.0261339
Lbh	3780.87	0.576726	0.178904	3.22366	0.00126565	0.0261339
Rpl18	2480.26	-0.617585	0.191529	-3.22449	0.00126197	0.0261339
Sbk1	457.346	-0.647908	0.200999	-3.22343	0.00126664	0.0261339
Chmp6	254.439	-0.79433	0.246623	-3.22083	0.00127822	0.0263301
Mrpl54	249.033	-0.790175	0.245383	-3.22018	0.00128112	0.026347
Tubb4b	1819.3	-0.653908	0.203097	-3.21969	0.00128331	0.0263494
Arfgef1	4301.27	0.580358	0.180526	3.21482	0.00130528	0.0267544
Fbxw5	294.736	-0.709237	0.220645	-3.21438	0.00130725	0.0267544
Cald1	4190.9	0.668181	0.207996	3.21247	0.001316	0.0268469
Pbxip1	946.39	-0.634374	0.197446	-3.21289	0.00131404	0.0268469
Fkbp10	310.724	-0.713365	0.22228	-3.20931	0.00133053	0.0270996
Arhgap21	7569.88	-0.950369	0.296652	-3.20365	0.00135696	0.0275055
Pds5b	3657.44	0.546155	0.170441	3.20436	0.00135363	0.0275055
Plcb3	298.117	-0.696287	0.217312	-3.20409	0.00135488	0.0275055
Psap	3803.54	-0.539557	0.168648	-3.1993	0.0013776	0.0278794
Dhrs7	717.504	0.611351	0.19114	3.19844	0.00138173	0.0279184
Fam124a	148.468	0.839936	0.262738	3.19686	0.00138932	0.0280271
Slc2a10	99.1347	-0.885241	0.277164	-3.19393	0.0014035	0.0282682
Cyb5r3	791.472	-0.59109	0.185097	-3.19341	0.00140604	0.0282745
Aes	1501.95	-0.576223	0.180645	-3.1898	0.0014237	0.0285845
Cxx1a	455.852	-0.672173	0.210866	-3.18768	0.00143419	0.0287494
Prkaca	1033.12	-0.563541	0.176928	-3.18514	0.00144685	0.0289575
Cpxm1	391.279	-0.650195	0.204468	-3.17993	0.00147311	0.0294367
F8	263.604	0.70836	0.223117	3.17484	0.00149919	0.0299108
Taldo1	815.625	-0.691794	0.218001	-3.17335	0.0015069	0.0300173
Got2	2653.17	-0.57536	0.181355	-3.17256	0.00151103	0.0300525
Htr1f	47.293	0.934904	0.295075	3.16836	0.00153301	0.0304418
Dpyd	462.366	0.758635	0.239507	3.16749	0.00153762	0.0304435
Fuom	284.966	-0.733426	0.231552	-3.16744	0.00153789	0.0304435
Spr	194.382	-0.791819	0.250098	-3.16604	0.0015453	0.030495
Pde1c	1257.36	0.587935	0.185842	3.16363	0.00155815	0.0306595
Slc4a8	70.293	0.912606	0.288474	3.16357	0.00155847	0.0306595
Zfp429	65.0314	-0.929227	0.294092	-3.15965	0.0015796	0.0310272
Pde4b	9286.54	0.572124	0.181263	3.15632	0.00159772	0.0313345
Atp5a1	16933.3	-0.624222	0.1978	-3.15582	0.00160047	0.03134
Ankrd42	117.98	0.837147	0.265579	3.15215	0.0016207	0.0316874
Arid4b	3382.13	0.574615	0.182338	3.15137	0.00162507	0.0317211
Nudt3	1364.96	-0.549232	0.174307	-3.15095	0.00162743	0.0317211
Lphn3	6829.42	0.576317	0.183371	3.1429	0.00167283	0.0325561
Ghr	5320.89	0.528988	0.168391	3.14144	0.00168122	0.0326692
mt-Cytb	15912.4	0.676028	0.215304	3.13988	0.00169018	0.0327931
2210408I21Rik	1534.57	0.561143	0.178816	3.13809	0.0017005	0.032943
Rpl13-ps3	345.854	-0.736266	0.234677	-3.13736	0.00170478	0.0329756
Fkbp9	4588.87	-0.520703	0.166028	-3.13623	0.00171132	0.0330061
Scn7a	721.38	0.641758	0.204646	3.13594	0.00171303	0.0330061
Sulf2	1321.28	-0.574496	0.183209	-3.13575	0.00171416	0.0330061
Osbpl1a	2078.9	0.520032	0.166065	3.1315	0.00173915	0.033386
Zfp536	529.232	-0.605323	0.193285	-3.13176	0.00173762	0.033386
Phb2	481.537	-0.689149	0.22025	-3.12894	0.0017544	0.0336278
Ptpn12	2225.46	0.542637	0.173577	3.12621	0.00177076	0.0338902
Gtf2a1	1417.6	0.598969	0.191645	3.12541	0.00177558	0.0339313
Dis3l	542.483	-0.60906	0.194943	-3.12429	0.00178232	0.0340089
Zfp641	150.048	-0.802976	0.257061	-3.12368	0.00178606	0.034029
Tomm40	384.556	-0.65282	0.209079	-3.12236	0.00179407	0.0341303
Nxpe4	150.313	0.7988	0.256033	3.11991	0.00180908	0.0343129
Mrps27	589.513	0.664096	0.213104	3.1163	0.00183137	0.034684
Fnbp1l	2516.32	0.598906	0.192372	3.11327	0.00185027	0.0348339
Gm10263	19.7278	-0.881193	0.283023	-3.11351	0.00184878	0.0348339
Map2k2	458.259	-0.635039	0.203954	-3.11364	0.00184797	0.0348339
Myo1c	1375.78	-0.557972	0.179209	-3.11352	0.00184868	0.0348339
Ubxn6	259.277	-0.761987	0.245055	-3.10945	0.00187437	0.0352353
Fkbp4	1507.41	-0.533125	0.171517	-3.1083	0.00188169	0.0353207
Adprhl2	175.541	-0.788675	0.253813	-3.1073	0.00188803	0.0353874
Dph5	544.762	-0.604954	0.194776	-3.10589	0.00189706	0.0355042
Myl4	18989.2	-0.50191	0.161666	-3.10462	0.00190527	0.0356052
Usp5	1274.39	-0.554712	0.178932	-3.10013	0.00193437	0.0360959
Rplp2	930.177	-0.608582	0.19639	-3.09884	0.00194278	0.0361997
Cables1	552.532	0.614326	0.19838	3.09671	0.00195679	0.0364073
Yipf3	222.007	-0.737527	0.238212	-3.09609	0.00196088	0.0364299
Kcnj11	54.117	-0.909176	0.293714	-3.09545	0.00196516	0.0364559
Hras	263.615	-0.70072	0.226499	-3.0937	0.00197679	0.0366183
Prune2	857.298	0.570326	0.184428	3.0924	0.00198542	0.0367245
Rpl11	4018.76	-0.526652	0.170378	-3.09107	0.00199434	0.0368358
H6pd	257.445	-0.709742	0.22966	-3.0904	0.00199884	0.0368653
Cdc20	625.31	-0.677339	0.21936	-3.0878	0.00201644	0.0371359
Pgd	548.393	-0.608688	0.197466	-3.0825	0.0020527	0.0377231
Hba-x	268.759	0.780159	0.253171	3.08154	0.0020593	0.0377607
Gmds	2890.04	0.549745	0.178529	3.0793	0.00207484	0.0379362
Ftl1	4769.5	-0.636199	0.206745	-3.07721	0.00208947	0.0380938
Hist1h1b	882.775	-0.58118	0.188855	-3.0774	0.00208818	0.0380938
Pilrb2	11.442	0.774608	0.251932	3.07467	0.00210735	0.0383646
Rps26	1874.88	-0.53539	0.174183	-3.07372	0.00211411	0.0384326
Tmem63a	291.679	-0.666892	0.217094	-3.0719	0.00212701	0.0386117
Bcl2l15	29.2328	0.902978	0.294333	3.06788	0.00215581	0.0390786
Rev1	1642.47	0.553084	0.18037	3.06639	0.00216664	0.039219
Rpl18a	3622.34	-0.536506	0.175036	-3.06511	0.0021759	0.0393304
Eif3i	1353.59	-0.607754	0.198383	-3.06354	0.00218737	0.0394815
Hist1h3c	162.653	-0.824824	0.269494	-3.06064	0.00220864	0.0398089
Olfml2b	766.282	-0.6218	0.203397	-3.05707	0.00223515	0.0402296
Agbl4	2801.43	0.587848	0.192341	3.05628	0.00224102	0.040278
Zfp81	650.92	0.582006	0.190522	3.0548	0.0022521	0.04042
Cd36	4005.15	-0.543058	0.17799	-3.05106	0.00228037	0.0408695
Pycrl	272.542	-0.749381	0.245729	-3.04962	0.0022913	0.0410075
Ptprk	12174.3	0.515726	0.169195	3.04812	0.00230276	0.0411545
Ppan	134.696	-0.777395	0.2554	-3.04383	0.0023359	0.0416881
Cadm2	194.202	0.856277	0.281756	3.03907	0.00237307	0.042292
Jup	427.452	-0.614276	0.202234	-3.03745	0.00238591	0.0424612
Acadvl	571.327	-0.702627	0.231431	-3.036	0.00239736	0.0425456
Gm10451	38.8176	0.901654	0.29698	3.03607	0.00239682	0.0425456
Psmb3	838.501	-0.619478	0.204179	-3.034	0.00241336	0.0427697
Mcrs1	618.444	-0.68131	0.224846	-3.03011	0.00244463	0.0432635
Hist1h2bh	159.238	-0.803425	0.265237	-3.02908	0.00245301	0.0433512
Ndufs8	649.341	-0.64607	0.21343	-3.02708	0.00246925	0.0435776
Rps19	4069.37	-0.593323	0.196051	-3.02637	0.00247506	0.0436195
Eno3	3446.39	-0.564542	0.186585	-3.02566	0.0024809	0.0436618
Ltbr	339.127	-0.713491	0.23621	-3.02058	0.0025229	0.0443395
Gria3	1778.69	0.553738	0.183618	3.01571	0.00256379	0.0449958
Ttk	896.41	0.538505	0.178632	3.01461	0.00257312	0.045097
Gm5111	13.6384	0.780072	0.258917	3.01283	0.00258826	0.0453
Clybl	610.849	0.599099	0.198942	3.01142	0.00260032	0.0453571
Ech1	818.608	-0.663806	0.220472	-3.01084	0.0026053	0.0453571
Edc3	227.131	0.819538	0.272352	3.00911	0.00262012	0.0453571
Foxp2	4437.93	0.558704	0.185661	3.00927	0.00261873	0.0453571
Psd3	6567.31	0.501008	0.166438	3.01019	0.00261087	0.0453571
Ptms	422.11	-0.604653	0.200896	-3.00979	0.00261432	0.0453571
Rap1a	2340.32	0.508136	0.168824	3.00985	0.00261377	0.0453571
Tubb5	14260.3	-0.523722	0.174179	-3.00681	0.00264009	0.0456404
Fxyd1	741.261	-0.588159	0.195658	-3.00606	0.0026466	0.0456907
Rbp1	918.129	-0.554758	0.184675	-3.00397	0.00266479	0.0459423
Itm2c	1995.07	-0.594704	0.198135	-3.00151	0.00268644	0.0462526
Tpi1	7423.72	-0.600662	0.200154	-3.00099	0.002691	0.0462684
Hecw2	2795.42	0.511398	0.170467	2.99998	0.00269995	0.0463594
Ankrd6	290.817	-0.677809	0.226011	-2.99902	0.00270853	0.0464439
Efcab11	528.905	-0.599641	0.200152	-2.99593	0.00273613	0.0468008
Grina	437.965	-0.626272	0.209046	-2.99586	0.00273672	0.0468008
Gm3604	127.668	0.774736	0.258763	2.994	0.00275345	0.0470236
Atp7a	1535.21	0.518448	0.17323	2.99282	0.00276409	0.0470786
Tbc1d19	1178.99	0.521396	0.174194	2.99319	0.00276075	0.0470786
Lrrcc1	1099.4	0.519059	0.173529	2.99119	0.00277894	0.0472681
Loxl3	59.1458	-0.874503	0.29271	-2.98761	0.00281165	0.0477604
Nudt7	275.977	-0.673275	0.225426	-2.98668	0.00282024	0.0478423
Dgki	822.149	0.705162	0.236255	2.98474	0.00283817	0.0480822
Arpc1b	413.679	-0.76532	0.256533	-2.98333	0.00285134	0.0481126
Kcnn2	3364.91	0.516725	0.173187	2.98362	0.0028486	0.0481126
Rpl13a	6939.87	-0.613949	0.205768	-2.98369	0.00284797	0.0481126
Frem3	220.857	0.717032	0.240385	2.98284	0.00285584	0.0481244
Timm44	782.569	-0.591199	0.198249	-2.9821	0.0028628	0.0481778
Pnkp	179.073	-0.757133	0.253938	-2.98156	0.00286781	0.0481982
2810408M09Rik	152.097	-0.762756	0.255871	-2.98101	0.00287299	0.0482214
Pla2r1	698.666	0.585581	0.196497	2.9801	0.00288153	0.0483008
Fzd8	188.584	-0.77755	0.260971	-2.97945	0.00288766	0.0483397
Trim72	45.0027	0.879552	0.295946	2.972	0.00295867	0.0493981
Sppl2b	138.711	-0.792247	0.266701	-2.97054	0.00297273	0.0495676
3830406C13Rik	477.998	0.587115	0.197723	2.96938	0.002984	0.0496903
BC034090	815.842	-0.58522	0.197117	-2.96889	0.00298875	0.0497041
Lrrc24	11.3015	-0.753402	0.253875	-2.96761	0.00300127	0.0498469
Cachd1	1506.77	0.536328	0.180767	2.96695	0.0030077	0.0498503
Enah	4172.18	0.50688	0.170893	2.96607	0.00301629	0.0498503
Fem1a	890.366	-0.604393	0.203725	-2.96672	0.00300996	0.0498503
Grid1	578.437	-0.660484	0.222775	-2.96481	0.00302875	0.0499763

## Sheet: E16.5
Gene	baseMean	log2FoldChange	lfcSE	stat	pvalue	padj
Gm3173	963.099	3.68318	0.155632	23.666	8.08362e-124	1.02411e-119
Gm2237	1058.49	3.32668	0.14956	22.2432	1.31355e-109	8.32069e-106
Gm2974	862.636	2.63244	0.151158	17.4152	6.3267e-68	2.67177e-64
Gm3383	682.632	2.76008	0.160977	17.1458	6.75962e-66	2.14094e-62
Gm3500	899.607	2.62995	0.153729	17.1078	1.29893e-65	3.29123e-62
Gm3194	646.732	2.82892	0.166084	17.0331	4.66555e-65	9.85131e-62
Snx14	190.074	4.43392	0.264966	16.7339	7.42176e-63	1.34323e-59
Gm3252	756.612	2.76128	0.16544	16.6906	1.53515e-62	2.43111e-59
Gm3558	916.724	2.62938	0.160773	16.3546	4.03358e-60	5.67794e-57
Gm3411	925.567	2.34196	0.14465	16.1905	5.88163e-59	7.45144e-56
Gm3667	884.951	2.58249	0.16196	15.9453	3.07305e-57	3.53931e-54
Gm10406	782.45	2.47184	0.155698	15.8759	9.30935e-57	9.82834e-54
Gm2897	610.704	2.3571	0.159995	14.7324	3.99532e-49	3.89359e-46
Lmntd1	366.777	3.74689	0.255564	14.6613	1.14105e-48	1.03257e-45
Gm3739	573.54	2.51565	0.172569	14.5776	3.8971e-48	3.29149e-45
Gm3020	491.447	2.64378	0.183566	14.4024	5.0013e-47	3.96009e-44
Gm3005	602.777	2.65724	0.185513	14.3237	1.55505e-46	1.15888e-43
2610042L04Rik	456.735	2.62352	0.183645	14.2858	2.68166e-46	1.88744e-43
Gm2956	484.594	2.52425	0.178717	14.1243	2.6909e-45	1.79426e-42
Gm8281	691.241	2.23545	0.158461	14.1072	3.42966e-45	2.17252e-42
Gm3696	817.315	2.03363	0.145836	13.9446	3.39219e-44	2.04646e-41
Gm3164	405.044	2.71797	0.199476	13.6255	2.82303e-42	1.62568e-39
Gm3264	486.288	2.4564	0.182593	13.4529	2.96143e-41	1.63124e-38
Unc13c	1391.32	-1.82225	0.136761	-13.3243	1.67098e-40	8.8207e-38
Gm3002	733.589	2.34907	0.177407	13.2411	5.07666e-40	2.57265e-37
Erdr1	5054.62	-2.70167	0.206179	-13.1035	3.14331e-39	1.53164e-36
Gm14403	658.42	-2.07709	0.15972	-13.0046	1.15212e-38	5.406e-36
Gm3468	439.451	2.34833	0.188001	12.4911	8.35205e-36	3.779e-33
Gm21887	1690.7	-2.4949	0.200663	-12.4333	1.7245e-35	7.53371e-33
Zfp951	356.268	-2.47892	0.21162	-11.714	1.08077e-31	4.56407e-29
Glrb	345.283	2.47582	0.215607	11.483	1.60659e-30	6.56575e-28
Gm5796	648.29	1.93724	0.176968	10.9468	6.87994e-28	2.72381e-25
Gm14410	2353.16	-1.39235	0.127806	-10.8943	1.22765e-27	4.71305e-25
Abca6	444.989	-1.97101	0.181944	-10.8331	2.39927e-27	8.94012e-25
Itgb3bp	82.7959	3.05319	0.282577	10.8048	3.26767e-27	1.1828e-24
Gm5786	308.495	2.06702	0.197969	10.4411	1.60913e-25	5.6628e-23
Gm8730	570.764	2.49132	0.240484	10.3596	3.78444e-25	1.29581e-22
Pdzd2	3430.77	-1.09317	0.107086	-10.2084	1.81815e-24	6.06163e-22
Gm3248	142.411	2.65145	0.260556	10.1761	2.53532e-24	8.23589e-22
Efemp1	547.509	-1.86611	0.18586	-10.0404	1.01307e-23	3.20864e-21
March1	389.136	2.10122	0.211267	9.94579	2.63072e-23	8.12894e-21
Agrp	83.2607	2.81329	0.284183	9.89957	4.18063e-23	1.23173e-20
Cpne5	628.043	1.55641	0.157183	9.90186	4.08614e-23	1.23173e-20
Ctsk	157.654	2.46396	0.249833	9.86245	6.05509e-23	1.74345e-20
Gm8108	489.173	2.12817	0.216855	9.8138	9.82022e-23	2.76472e-20
Gm10409	244.322	2.20147	0.225237	9.77401	1.45571e-22	4.00921e-20
Pgbd5	221.792	2.23965	0.231193	9.68733	3.41327e-22	9.20059e-20
Bmp10	614.762	-2.31064	0.240641	-9.60202	7.83909e-22	2.06903e-19
Wdr72	140.385	-2.51487	0.263297	-9.55148	1.27857e-21	3.30574e-19
Gm8113	1501.03	1.28194	0.139082	9.21719	3.04975e-20	7.72746e-18
Dcc	935.189	-1.27755	0.14304	-8.93141	4.20625e-19	1.04488e-16
Limch1	2698.12	-0.976559	0.111045	-8.79429	1.43952e-18	3.50717e-16
Postn	42193.4	-0.958165	0.109345	-8.76277	1.90509e-18	4.55389e-16
Usp16	1317.52	-1.15798	0.132371	-8.74795	2.17263e-18	5.09723e-16
Gm5611	72.2679	-2.44641	0.283882	-8.61772	6.82984e-18	1.57322e-15
Gm8237	124.119	2.17513	0.253015	8.59683	8.1951e-18	1.854e-15
Rpl26	2656.53	1.49743	0.174334	8.58943	8.74053e-18	1.9427e-15
Agtr1a	298.354	-1.86817	0.223617	-8.35433	6.58024e-17	1.43733e-14
Il11ra1	52.4021	2.37179	0.284511	8.33636	7.66102e-17	1.64504e-14
Smad6	1709.74	1.03771	0.124717	8.32058	8.75352e-17	1.84831e-14
Grip1	7120.97	1.40377	0.169114	8.30069	1.03507e-16	2.14971e-14
Myl7	19701	0.941466	0.114069	8.25347	1.53855e-16	3.14386e-14
Erp29	50.9853	2.33838	0.284417	8.22164	2.00738e-16	4.03676e-14
Nes	1394.6	1.06225	0.1294	8.20905	2.22943e-16	4.41322e-14
Acsl1	1901.97	-1.42147	0.173416	-8.19688	2.46699e-16	4.80834e-14
Gm21092	7222.23	0.839583	0.1027	8.17506	2.95708e-16	5.67625e-14
Cdc26	74.4006	2.29329	0.283902	8.07775	6.59748e-16	1.24752e-13
Plin4	321.066	-1.88	0.233114	-8.06471	7.34109e-16	1.36771e-13
Rps2	2772.8	1.08337	0.136685	7.926	2.26318e-15	4.1554e-13
A530054K11Rik	534.775	-1.32177	0.169578	-7.79452	6.46558e-15	1.17018e-12
Wnk3	45.2212	2.19025	0.283724	7.71968	1.16625e-14	2.08101e-12
Cnn1	1011.87	1.07349	0.140001	7.66772	1.7508e-14	3.08068e-12
Zbtb16	1101.44	-1.35519	0.176887	-7.66136	1.83978e-14	3.1929e-12
Myl9	8791.89	0.882491	0.117153	7.53279	4.96682e-14	8.50334e-12
Cct8	3854.02	-0.84382	0.113142	-7.45806	8.7809e-14	1.48327e-11
Fstl4	2590.99	-0.891087	0.120575	-7.39032	1.46478e-13	2.44175e-11
Stag3	87.145	2.03352	0.275421	7.38332	1.5439e-13	2.54022e-11
Cobll1	1238.78	-1.11006	0.150436	-7.37891	1.59596e-13	2.5922e-11
Gm14420	1317.17	-1.1046	0.150509	-7.33905	2.15112e-13	3.44969e-11
1110002E22Rik	903.039	-1.33012	0.181389	-7.33294	2.25152e-13	3.56556e-11
Meox2	457.556	-1.3448	0.183455	-7.33041	2.29457e-13	3.58888e-11
Gm3488	236.667	1.80181	0.246014	7.324	2.40694e-13	3.71873e-11
Slc6a17	200.65	-1.76527	0.241106	-7.32152	2.45185e-13	3.74247e-11
Ccrn4l	286.658	-1.46683	0.200723	-7.30771	2.71731e-13	4.09829e-11
Lpl	2663.24	-1.13016	0.154842	-7.29879	2.90373e-13	4.32793e-11
Tpm3-rs7	362.293	-1.37854	0.188994	-7.29408	3.00705e-13	4.42981e-11
Ppargc1a	4763.66	-0.863786	0.120793	-7.15094	8.61834e-13	1.25501e-10
Gon4l	1366.91	0.914724	0.129752	7.04981	1.79166e-12	2.57937e-10
Rgs5	1701.5	-0.846515	0.12036	-7.03322	2.01826e-12	2.87296e-10
Hmcn1	6728.39	-0.73149	0.104384	-7.0077	2.42273e-12	3.4104e-10
Prss35	1837.31	1.00304	0.143677	6.98117	2.92731e-12	4.0754e-10
Ppp1r17	297.596	1.33744	0.192373	6.95231	3.59362e-12	4.94865e-10
Ifi44	54.7382	1.97465	0.28451	6.94053	3.90619e-12	5.32124e-10
Ahsa2	203.064	1.88029	0.272468	6.90097	5.16476e-12	6.96089e-10
Khdrbs2	585.848	1.41988	0.206262	6.88388	5.82443e-12	7.76733e-10
Ank2	7199.27	-1.19274	0.175863	-6.78222	1.1834e-11	1.55525e-09
Zfp536	948.853	-0.951419	0.1403	-6.78133	1.19078e-11	1.55525e-09
Gm4631	1351.33	-0.928622	0.13726	-6.76542	1.32925e-11	1.71839e-09
Gm10340	156.949	1.6196	0.239587	6.75996	1.38031e-11	1.76638e-09
Cd36	5502.09	-1.04261	0.154868	-6.73226	1.67047e-11	2.11631e-09
4930447C04Rik	95.3644	1.79271	0.266537	6.72594	1.74463e-11	2.18838e-09
Gcnt1	812.429	-1.01219	0.150626	-6.71988	1.81881e-11	2.25906e-09
Myom2	4669.42	-0.73278	0.109134	-6.7145	1.88707e-11	2.3211e-09
Zfp40	379.234	-1.24387	0.185861	-6.69249	2.19404e-11	2.67272e-09
Egln3	695.607	-1.0536	0.157489	-6.69	2.23177e-11	2.69278e-09
Sorbs1	3203.07	-0.76723	0.114945	-6.67474	2.47676e-11	3e-09
Gm3526	49.2773	1.89766	0.284451	6.6713	2.53553e-11	3e-09
Rp9	480.255	-1.1838	0.177764	-6.65937	2.75013e-11	3.22605e-09
Gm2026	1237.03	-0.929329	0.139796	-6.64776	2.97586e-11	3.45882e-09
Alox8	62.4359	-1.88746	0.284363	-6.63751	3.19025e-11	3.67429e-09
Dpp6	1139.37	-1.30152	0.196254	-6.63182	3.31578e-11	3.78448e-09
Gm14434	1101.94	-0.937047	0.143552	-6.5276	6.68316e-11	7.49283e-09
Nudt4	1900.35	-0.846721	0.129702	-6.52819	6.65688e-11	7.49283e-09
Gm14308	1431.95	-0.871933	0.133696	-6.52177	6.94822e-11	7.72167e-09
Agl	6043.69	-1.0244	0.157424	-6.50728	7.65233e-11	8.43021e-09
Cxcl12	774.123	-1.1347	0.174496	-6.50273	7.88761e-11	8.61449e-09
Serinc3	4303	-0.670295	0.103588	-6.4708	9.74835e-11	1.05557e-08
Cacna1d	5435.24	0.788167	0.122036	6.45847	1.05765e-10	1.13554e-08
Efcab11	565.479	-1.08948	0.171336	-6.35874	2.03418e-10	2.16563e-08
Gm10251	46.0428	1.80378	0.284517	6.33982	2.3003e-10	2.42854e-08
Sgcb	680.977	-1.12229	0.177071	-6.33809	2.32636e-10	2.43576e-08
Phactr2	4158	-0.674793	0.106519	-6.33495	2.37421e-10	2.46548e-08
Cdh10	525.191	1.07993	0.170548	6.33211	2.41833e-10	2.49087e-08
Ndrg1	845.964	-0.968982	0.153432	-6.31539	2.69486e-10	2.75333e-08
Adamts9	2458.59	-0.784642	0.125047	-6.27478	3.50126e-10	3.5486e-08
Rxfp1	2478.81	-0.779444	0.124325	-6.26939	3.62462e-10	3.64447e-08
Mctp1	432.756	-1.10778	0.177011	-6.25826	3.89299e-10	3.88349e-08
Rassf4	33.9937	1.73262	0.277802	6.2369	4.46327e-10	4.41759e-08
Gm6483	2086.77	0.711995	0.114467	6.22008	4.96886e-10	4.87989e-08
Gm10036	335.325	1.66543	0.268059	6.21291	5.20111e-10	5.06868e-08
2610305D13Rik	67.4178	1.74243	0.280955	6.20181	5.58172e-10	5.37717e-08
Tmem241	672.5	-0.989039	0.159491	-6.20122	5.60254e-10	5.37717e-08
Ptprb	1900.24	-0.728251	0.117499	-6.19794	5.72081e-10	5.44939e-08
Sugct	413.512	-1.31503	0.21256	-6.18664	6.14613e-10	5.81084e-08
Gm3629	147.635	1.5767	0.255478	6.17157	6.76163e-10	6.34542e-08
Tead2	841.629	0.919507	0.149798	6.13831	8.34066e-10	7.76969e-08
Gm8225	95.1705	1.60697	0.262316	6.12607	9.00751e-10	8.32964e-08
Clstn2	516.121	1.26063	0.207204	6.08397	1.17242e-09	1.07634e-07
Psip1	258.01	1.68464	0.277098	6.07959	1.20493e-09	1.09822e-07
Hbp1	36.5551	-1.70158	0.280103	-6.07484	1.24112e-09	1.12313e-07
Gm11007	969.549	-0.922868	0.152017	-6.07081	1.27266e-09	1.14349e-07
Bnip3	1869.3	-0.821384	0.135372	-6.06762	1.29823e-09	1.15826e-07
Rnf128	329.593	-1.15489	0.19103	-6.04561	1.48843e-09	1.31867e-07
Pip5k1b	3071.97	-0.694298	0.115104	-6.0319	1.62046e-09	1.42567e-07
Ahnak	35556.3	-0.670828	0.111493	-6.01676	1.7794e-09	1.54406e-07
Dynlt1a	721.318	1.0143	0.168558	6.01751	1.77122e-09	1.54406e-07
Tnnt1	762.565	1.00424	0.166968	6.01455	1.80382e-09	1.5546e-07
Maged2	3723.98	0.686472	0.114301	6.00582	1.90364e-09	1.63e-07
Hs3st4	522.456	1.34035	0.223369	6.00059	2e-09	1.67165e-07
Alpk1	457.029	1.09378	0.1825	5.99334	2.05578e-09	1.73631e-07
Mcam	3854.41	0.732833	0.122523	5.98121	2.21493e-09	1.85834e-07
Eno2	242.835	-1.28365	0.215088	-5.96803	2.40136e-09	2.0015e-07
Tcf4	8292.65	-0.60818	0.102279	-5.9463	2.74275e-09	2.2711e-07
Greb1l	1146.65	-0.879573	0.149045	-5.90138	3.60464e-09	2.9654e-07
Gm14443	49.2985	1.67165	0.284441	5.87696	4.17861e-09	3.4154e-07
Ddx6	2476.55	-0.658611	0.112366	-5.86127	4.59327e-09	3.73e-07
Kctd16	2625.61	-0.748854	0.127874	-5.8562	4.73574e-09	3.82147e-07
Ndst4	223.816	1.21833	0.208648	5.83914	5.24705e-09	4.20727e-07
Mpzl1	1223.7	-0.834892	0.143077	-5.83526	5.37071e-09	4.27934e-07
Fam63b	818.985	-0.85237	0.14634	-5.8246	5.72502e-09	4.53314e-07
Prpf39	940.694	-0.926098	0.159303	-5.81346	6.1196e-09	4.81548e-07
Gm4724	1008.29	-0.839896	0.144919	-5.79562	6.80703e-09	5.32335e-07
Raph1	3815.62	-0.617562	0.106835	-5.78055	7.44579e-09	5.78716e-07
Frem3	72.396	1.6113	0.279107	5.77305	7.78503e-09	6.01393e-07
Myl1	787.682	-0.887724	0.154049	-5.76262	8.28198e-09	6.35906e-07
Ncl	1959.67	-0.741957	0.128868	-5.75749	8.53753e-09	6.51578e-07
Lipo1	292.377	1.17687	0.204641	5.75088	8.87782e-09	6.73492e-07
Col24a1	622.097	-1.17573	0.205092	-5.73273	9.88287e-09	7.40654e-07
Ero1l	1386.63	-0.727962	0.126996	-5.73216	9.91587e-09	7.40654e-07
H2-D1	193.603	-1.37252	0.239459	-5.73177	9.93853e-09	7.40654e-07
Myl4	11407.5	0.72075	0.125777	5.73039	1e-08	7.42358e-07
Abi1	5113.99	-0.721369	0.126045	-5.72312	1.04588e-08	7.70367e-07
Kcnq3	1343.65	0.952432	0.166893	5.70684	1.15094e-08	8.42847e-07
Hcn4	453.138	1.14442	0.200596	5.70513	1.16251e-08	8.4643e-07
Dhx9	2459.23	-0.722219	0.127339	-5.67161	1.41458e-08	1.02407e-06
Cltc	9343.39	-0.555177	0.098101	-5.65924	1.52044e-08	1.09446e-06
Lphn3	4780.76	0.713078	0.126488	5.63753	1.72509e-08	1.23475e-06
Gm8898	1289.38	-0.784648	0.139353	-5.63066	1.8e-08	1.27776e-06
Gm4245	1154.99	-0.8044	0.143135	-5.61986	1.91107e-08	1.35259e-06
Zbtb20	16002.6	-0.584933	0.104252	-5.61078	2.01412e-08	1.4176e-06
Gm14431	1157.31	-0.80267	0.143354	-5.5992	2.15343e-08	1.50728e-06
Myadm	1320.49	-0.810446	0.144983	-5.58992	2.27173e-08	1.58135e-06
Slfn9	419.191	-1.03728	0.185603	-5.5887	2.28777e-08	1.58381e-06
Pcdh11x	819.617	1.12208	0.201029	5.58168	2.38206e-08	1.64012e-06
Tatdn3	438.319	-0.959194	0.171981	-5.57731	2.4426e-08	1.67272e-06
Abcc9	2309.62	-1.05466	0.189408	-5.56819	2.57393e-08	1.75318e-06
Csrp2	2641.24	0.635688	0.114195	5.56667	2.6e-08	1.75916e-06
Zbtb8b	99.9239	-1.46948	0.264312	-5.55965	2.7e-08	1.82158e-06
Apold1	246.259	-1.18461	0.213647	-5.54472	2.94417e-08	1.97353e-06
Ctnna2	2872.18	1.10823	0.200645	5.52334	3.32623e-08	2.2179e-06
D5Ertd579e	3582.75	0.613512	0.111111	5.52162	3.35879e-08	2.22788e-06
Eltd1	508.198	-1.03721	0.187914	-5.5196	3.4e-08	2.24193e-06
Clic5	1224.48	-0.853258	0.155035	-5.50366	3.71989e-08	2.44183e-06
Col15a1	640.093	-1.12312	0.204106	-5.50262	3.74193e-08	2.44363e-06
E030030I06Rik	81.3492	-1.54826	0.281651	-5.4971	3.86092e-08	2.50841e-06
Rragd	1232.03	-0.901485	0.16443	-5.48248	4.19413e-08	2.711e-06
Bend6	288.77	1.09335	0.199533	5.47955	4.26409e-08	2.72232e-06
Csmd3	253.64	1.28464	0.234464	5.47905	4.27612e-08	2.72232e-06
Rai1	2507.11	0.647111	0.118078	5.48037	4.24446e-08	2.72232e-06
Fuca2	614.074	-0.925216	0.169286	-5.4654	4.61876e-08	2.92576e-06
Gm2007	909.93	-0.845202	0.154747	-5.46182	4.71291e-08	2.95583e-06
Heca	1462.07	-0.69115	0.126536	-5.46208	4.70576e-08	2.95583e-06
Clec14a	739.62	-0.898121	0.165035	-5.44199	5.26892e-08	3.28827e-06
Gm4723	1222.15	-0.769799	0.1415	-5.44027	5.31988e-08	3.3038e-06
Mef2c	4347.9	-0.559131	0.102794	-5.43931	5.34864e-08	3.30546e-06
Mfn1	1654.29	-0.710731	0.131027	-5.42431	5.81785e-08	3.56776e-06
Rnf13	1300.04	-0.692511	0.127676	-5.42396	5.8294e-08	3.56776e-06
Kank4	393.016	1.179	0.21765	5.41696	6.0621e-08	3.69234e-06
Mtus1	3464.18	-0.625527	0.116196	-5.38337	7.31039e-08	4.43136e-06
Gm3618	29.0631	1.49038	0.278501	5.35143	8.72607e-08	5.26431e-06
Aoc3	91.5657	-1.43558	0.269178	-5.33319	9.65022e-08	5.73984e-06
Gm13305	193.75	-1.26435	0.237039	-5.33395	9.60984e-08	5.73984e-06
Phgdh	236.218	1.11353	0.208782	5.33343	9.63724e-08	5.73984e-06
Pde4d	11225.4	-0.557706	0.104665	-5.32847	9.9e-08	5.86349e-06
Fxyd6	473.46	0.975731	0.183382	5.32077	1.03329e-07	6.0887e-06
Hbb-y	120.774	1.50286	0.282593	5.31812	1.04843e-07	6.14935e-06
Mgp	1083.95	0.794058	0.149502	5.31135	1.08813e-07	6.35279e-06
Tmtc1	1811.17	-0.698071	0.131572	-5.30561	1.12299e-07	6.52623e-06
Upp2	388.311	0.957243	0.180679	5.29805	1.17e-07	6.77113e-06
Crebrf	1304.6	-0.677022	0.127875	-5.29441	1.19401e-07	6.87587e-06
Srp9	362.918	0.983409	0.185804	5.29271	1.20514e-07	6.90855e-06
Dock2	50.1396	-1.48435	0.280648	-5.28901	1.23e-07	7.01835e-06
Dnlz	106.934	1.33795	0.254375	5.25977	1.44233e-07	8.19412e-06
Cyyr1	918.604	-0.889337	0.169205	-5.25597	1.47248e-07	8.32807e-06
Olfr872	163.625	1.35243	0.258538	5.23107	1.68528e-07	9.48925e-06
Capg	42.955	1.48347	0.284392	5.21629	1.82547e-07	1.02331e-05
Gm10128	62.1721	1.45093	0.278635	5.20728	1.91628e-07	1.06948e-05
Crat	960.626	-1.03409	0.198641	-5.20582	1.93142e-07	1.07321e-05
Mlh1	562.732	-0.849264	0.163184	-5.20434	1.9469e-07	1.07709e-05
4932438A13Rik	3368.96	-0.581844	0.111882	-5.20051	1.98741e-07	1.09472e-05
Trp53inp2	634.637	-0.882991	0.170213	-5.18757	2.13053e-07	1.16847e-05
Gm14325	816.541	-0.772136	0.148909	-5.1853	2.15663e-07	1.17263e-05
Sel1l3	159.224	-1.30782	0.252207	-5.18551	2.1542e-07	1.17263e-05
Dhrs7	885.424	0.742936	0.143626	5.17272	2.30708e-07	1.24908e-05
Asns	200.234	1.14311	0.221396	5.16318	2.42787e-07	1.30888e-05
Pcdh15	465.613	1.04426	0.202314	5.1616	2.44845e-07	1.31438e-05
Fggy	697.094	-0.971828	0.188396	-5.15844	2.49e-07	1.33111e-05
Maged1	3939.15	0.566512	0.110169	5.14219	2.71551e-07	1.4455e-05
Mdk	311.532	1.00922	0.196629	5.1326	2.85766e-07	1.50849e-05
Uchl1	229.527	1.1298	0.220109	5.13291	2.85302e-07	1.50849e-05
Hnrnpa0	504.785	-0.967256	0.188615	-5.1282	2.92533e-07	1.5378e-05
Dab2ip	2328.75	0.586855	0.114873	5.10874	3.24316e-07	1.69784e-05
Dynlt1c	1373.15	0.790938	0.154865	5.10726	3.26859e-07	1.70411e-05
Zfp943	683.621	-0.805091	0.158054	-5.09377	3.51e-07	1.82254e-05
Vegfc	984.047	-0.723537	0.142217	-5.08758	3.62668e-07	1.87537e-05
Dock4	4036.57	-0.537574	0.105736	-5.08414	3.69304e-07	1.90192e-05
C78339	913.328	-0.705446	0.138925	-5.0779	3.81632e-07	1.95745e-05
Etfa	1786.12	-0.786284	0.155066	-5.07066	3.96441e-07	2.0252e-05
Shisa6	1157.5	0.862332	0.170509	5.05742	4.25e-07	2.16226e-05
Gsg1l	569.178	0.984697	0.195064	5.04807	4.46305e-07	2.26169e-05
Rfc5	89	1.33854	0.265662	5.03853	4.6913e-07	2.36789e-05
Pkdcc	521.777	0.845279	0.167886	5.03484	4.78256e-07	2.40438e-05
Gabrb2	283.219	1.09255	0.217397	5.02557	5.01942e-07	2.51348e-05
Usp25	2612.94	-0.582117	0.115921	-5.02169	5.12196e-07	2.55473e-05
Gm3239	134.679	1.33168	0.266202	5.00252	5.65869e-07	2.81137e-05
Tmem181a	708.384	0.738526	0.148178	4.98405	6.2266e-07	3.08144e-05
Ephx2	475.923	-0.935952	0.187949	-4.97982	6.36447e-07	3.13741e-05
Rb1	477.249	-0.995123	0.200476	-4.9638	6.91255e-07	3.39438e-05
Itgav	1867.16	-0.739539	0.149147	-4.95845	7.10562e-07	3.47572e-05
Ntm	5336.11	0.69344	0.139963	4.95445	7.25359e-07	3.53445e-05
Fancc	360.439	-1.06003	0.214165	-4.94959	7.4371e-07	3.60275e-05
Rcan2	4689.92	-0.525225	0.106122	-4.94923	7.45064e-07	3.60275e-05
Nipal4	158.986	1.18447	0.239816	4.93909	7.84891e-07	3.78091e-05
BC005537	1549.68	-0.609722	0.12379	-4.92544	8.41703e-07	4.03922e-05
Zfp871	1133.82	-0.70344	0.142902	-4.92253	8.54339e-07	4.08439e-05
Gde1	685.554	0.741323	0.150683	4.91976	8.66515e-07	4.12702e-05
Eif3k	661.817	0.919831	0.187112	4.91594	8.83591e-07	4.19259e-05
Vldlr	3541.25	-0.658404	0.13399	-4.91382	8.93173e-07	4.22224e-05
Zfp516	2336.26	0.606251	0.123699	4.90104	9.53316e-07	4.4898e-05
Cpq	2845.26	-0.602649	0.123005	-4.89939	9.61363e-07	4.51093e-05
Pabpc1	1563.5	-0.700013	0.143075	-4.89262	9.95e-07	4.65153e-05
Cdca3	275.147	1.02761	0.210135	4.89025	1.00706e-06	4.69062e-05
Enpep	1248.97	0.639402	0.13086	4.88614	1.0283e-06	4.77199e-05
Rcn3	776.269	0.706953	0.144751	4.88393	1.03993e-06	4.79086e-05
Slc17a7	94.3399	1.31189	0.268595	4.88429	1.038e-06	4.79086e-05
Xdh	50.1544	-1.38529	0.283762	-4.88186	1.05089e-06	4.8238e-05
Abca8a	1632.84	-0.797152	0.163434	-4.87752	1.0743e-06	4.91349e-05
Lyrm7	105.348	-1.27724	0.262108	-4.87294	1.09949e-06	5.01059e-05
Tmem245	2129.52	-0.593279	0.121826	-4.86987	1.11673e-06	5.07092e-05
Bambi	738.05	0.758114	0.155702	4.86901	1.1216e-06	5.07482e-05
Frmd5	890.66	-0.769472	0.158122	-4.86631	1.137e-06	5.12633e-05
Esd	1171.83	-0.712553	0.1466	-4.86053	1.1707e-06	5.25942e-05
Adam10	3020.07	-0.582041	0.11993	-4.85316	1.21508e-06	5.43812e-05
Ahdc1	614.226	0.745196	0.153569	4.85251	1.21906e-06	5.43812e-05
Ror2	1696.46	0.68113	0.140605	4.84429	1.27066e-06	5.64842e-05
Oprk1	48.0642	1.37306	0.283783	4.83841	1.30882e-06	5.79771e-05
Pura	1071.43	-0.675712	0.140025	-4.82565	1.3955e-06	6.16015e-05
Limd1	1512.58	-0.729821	0.15146	-4.81856	1.44595e-06	6.36065e-05
Cisd2	545.314	-0.828661	0.172214	-4.81182	1.49565e-06	6.53393e-05
Usp34	4742.29	-0.545005	0.113252	-4.81234	1.49171e-06	6.53393e-05
Nceh1	1084.21	-0.763126	0.158702	-4.80853	1.52041e-06	6.61926e-05
Pparg	202.09	-1.11631	0.232234	-4.80686	1.53322e-06	6.65216e-05
Fabp4	1346.22	-0.964742	0.201056	-4.79837	1.59961e-06	6.91654e-05
Insr	3428.84	-0.551727	0.115023	-4.79667	1.61328e-06	6.95193e-05
Tex11	103.169	1.24297	0.259292	4.79372	1.63718e-06	7.03098e-05
Trmt13	22.9016	1.26299	0.263538	4.79244	1.64767e-06	7.05213e-05
Flt1	1508.24	-0.642942	0.134274	-4.78828	1.68219e-06	7.17564e-05
Chst11	1637.76	0.583122	0.12185	4.78556	1.70515e-06	7.24917e-05
Fam13a	382.912	-0.972197	0.20337	-4.78044	1.74914e-06	7.41133e-05
Rtn4	5822.02	-0.522813	0.109575	-4.77127	1.83071e-06	7.73108e-05
Aste1	29.5338	-1.27645	0.267951	-4.76375	1.90032e-06	7.99838e-05
Gm3512	152.716	1.11063	0.233799	4.75035	2.0307e-06	8.49072e-05
Stt3b	3026.41	-0.53317	0.112224	-4.75095	2.02459e-06	8.49072e-05
Acadl	2852.39	-0.786234	0.16561	-4.74749	2.05955e-06	8.5549e-05
Abca5	839.994	0.697275	0.147073	4.74101	2.12654e-06	8.80429e-05
Jmy	1119.89	-0.649487	0.137027	-4.73985	2.13875e-06	8.82602e-05
AI314180	3847.07	-0.515363	0.108976	-4.72915	2.25467e-06	9.27414e-05
Mccc1	421.125	-0.840997	0.17825	-4.71808	2.38082e-06	9.76134e-05
Rhobtb1	960.8	-0.677045	0.143551	-4.71639	2.40062e-06	9.81079e-05
Vcpip1	743.556	-0.716206	0.152028	-4.71101	2.46488e-06	0.00010041
Susd1	436.543	0.839229	0.17858	4.69946	2.60855e-06	0.000105922
Heg1	3007.61	-0.507297	0.107988	-4.69774	2.63057e-06	0.000106475
Selenbp2	79.8704	-1.29888	0.276565	-4.69648	2.6468e-06	0.000106791
Megf6	661.601	0.899045	0.191859	4.68597	2.78639e-06	0.000112066
Ankrd28	2272.39	-0.541062	0.115618	-4.67975	2.87226e-06	0.000115154
Ammecr1	1808.53	-0.682135	0.146061	-4.67021	3.00887e-06	0.000119872
Msn	2528.17	-0.59986	0.128431	-4.67067	3.00212e-06	0.000119872
Thoc1	1184.06	0.636531	0.13671	4.65607	3.223e-06	0.000128002
Srp54a	1498.46	0.572781	0.123269	4.64661	3.37433e-06	0.000133592
Gja1	2379.82	-0.990663	0.213685	-4.6361	3.5505e-06	0.000140129
Synpr	61.5034	-1.31956	0.284682	-4.63521	3.56569e-06	0.000140291
Riok3	2538.44	0.542052	0.117024	4.63195	3.62229e-06	0.000142077
Olfr39	38.7877	1.31655	0.284352	4.63002	3.65632e-06	0.000142969
4833420G17Rik	654.219	-0.76835	0.165983	-4.62908	3.67287e-06	0.000143174
Adhfe1	88.353	-1.27462	0.276268	-4.61372	3.95529e-06	0.00015371
Mrpl15	629.208	-0.765764	0.166098	-4.6103	4.02086e-06	0.000155781
4930523C07Rik	150.633	-1.10933	0.241032	-4.60243	4.1758e-06	0.00016129
Ctse	65.4527	-1.27759	0.277958	-4.59635	4.29953e-06	0.000165565
Tpm3	1428.21	0.601449	0.131144	4.58616	4.51475e-06	0.000173326
Oprd1	63.2114	1.29804	0.283362	4.58085	4.63094e-06	0.000177249
Kcnip2	111.6	-1.27131	0.278023	-4.57267	4.81546e-06	0.000183756
Pdlim3	4046.37	0.572896	0.12554	4.56345	5.032e-06	0.000191443
Ldb2	2366.63	-0.682959	0.149729	-4.56131	5.08352e-06	0.000192824
Stx6	1099.69	0.60648	0.132986	4.56047	5.10383e-06	0.000193016
Zc3h6	278.557	-0.925411	0.203072	-4.55707	5.18729e-06	0.000195588
Ddc	749.711	-1.06412	0.233576	-4.55578	5.21917e-06	0.000196027
Dld	2273.53	-0.713657	0.156666	-4.55527	5.23176e-06	0.000196027
Ogdh	3317.74	-0.674788	0.148151	-4.55473	5.24534e-06	0.000196027
Gm3095	96.3829	1.22001	0.268745	4.53965	5.63479e-06	0.000209962
Prkaa2	3175.77	-0.669565	0.147518	-4.53888	5.65546e-06	0.000210115
Rps18	2254.28	0.810446	0.178712	4.53493	5.76212e-06	0.000213451
Epas1	603.062	-0.711703	0.157134	-4.52926	5.919e-06	0.000217938
Qsox1	872.861	0.646243	0.1427	4.5287	5.93486e-06	0.000217938
Sash1	1843.42	-0.60228	0.132961	-4.52974	5.90576e-06	0.000217938
Arhgap18	3078.3	-0.560869	0.124554	-4.503	6.7001e-06	0.000245328
Shox2	432.577	0.874044	0.194453	4.49489	6.96054e-06	0.00025413
Dnajc10	2347.83	-0.581308	0.129393	-4.49257	7.037e-06	0.000254911
Nexn	5307.87	-0.599306	0.133378	-4.4933	7.01293e-06	0.000254911
Tnfrsf10b	161.196	1.07091	0.238382	4.49241	7.04228e-06	0.000254911
Naa50	1143.31	-0.6036	0.134422	-4.49032	7.11146e-06	0.000256681
Arhgap11a	665.677	-0.914727	0.204365	-4.47594	7.60755e-06	0.000273078
Hsdl2	1033.77	-0.781504	0.174603	-4.4759	7.60886e-06	0.000273078
Epb4.1l3	1901.37	-0.529672	0.11838	-4.47433	7.66529e-06	0.000274327
Tbc1d15	555.407	-0.717143	0.160913	-4.45672	8.3224e-06	0.000297004
Hmgn3	366.422	-0.835944	0.187683	-4.45403	8.42738e-06	0.000299906
Sucla2	2857.23	-0.593241	0.13349	-4.44408	8.82706e-06	0.000313249
Rnf17	136.391	1.20129	0.270603	4.4393	9.02511e-06	0.000318633
Tjp1	3819.15	-0.500487	0.112742	-4.43921	9.02907e-06	0.000318633
Shank2	225.616	-1.2237	0.276234	-4.42995	9.42555e-06	0.000330782
Col26a1	237.259	0.908736	0.205208	4.42835	9.4955e-06	0.000332316
Kcnc2	729.036	-0.695536	0.157193	-4.42474	9.65577e-06	0.000336994
Atp2a2	33463	-0.5662	0.128015	-4.42293	9.737e-06	0.000338896
Fasn	629.403	0.78464	0.177748	4.41435	1.01315e-05	0.0003507
Cnot6l	1793.92	-0.585354	0.13272	-4.41044	1.03159e-05	0.00035611
Gm6576	100.276	1.17098	0.266082	4.40082	1.07844e-05	0.000371009
3110057O12Rik	753.91	-0.65953	0.150011	-4.39655	1.09987e-05	0.000376602
Fmn1	179.192	-1.06495	0.242259	-4.3959	1.10314e-05	0.000376703
Btbd3	1149.67	-0.574859	0.13089	-4.39191	1.12359e-05	0.000381934
Wnk1	5230.7	-0.5008	0.114032	-4.39174	1.12449e-05	0.000381934
Eml6	354.213	0.903636	0.205898	4.38876	1.13997e-05	0.000386157
Hfm1	71.3514	1.22023	0.278247	4.38541	1.15766e-05	0.000391102
Fgf14	4487.26	0.80912	0.184683	4.38112	1.18069e-05	0.000397822
Bai3	1010.3	1.04523	0.238611	4.38048	1.18419e-05	0.000397946
Lgals1	1764.36	0.565288	0.129075	4.37952	1.1894e-05	0.000398639
Fam134b	1860.58	-0.708442	0.161856	-4.37699	1.20332e-05	0.000402239
Atp13a3	2207.73	-0.656484	0.150993	-4.34778	1.37524e-05	0.000456097
Pdk4	820.872	-0.730764	0.168118	-4.34672	1.38187e-05	0.000457099
Purb	2224.13	-0.547829	0.126225	-4.34009	1.42423e-05	0.000469884
Car2	178.196	-1.02626	0.236745	-4.33488	1.4584e-05	0.000479909
Arhgef3	1319.13	-0.56847	0.131486	-4.32344	1.53615e-05	0.000502879
Olfr1033	19.3792	1.10661	0.255928	4.3239	1.53293e-05	0.000502879
Hnrnpa3	2080.54	-0.542888	0.125796	-4.31563	1.59151e-05	0.000519662
Rps18-ps3	116.978	-1.18441	0.274716	-4.31139	1.62232e-05	0.000527006
Rad9b	22.4745	1.09855	0.25535	4.30214	1.69156e-05	0.000548092
Cpeb3	1668.05	-0.634508	0.147515	-4.30132	1.69786e-05	0.000548729
Sphkap	2132.79	0.527241	0.122965	4.28774	1.80498e-05	0.000580389
Polr2a	647.884	-0.725647	0.169687	-4.27638	1.89957e-05	0.000609257
Ifit2	150.71	1.10528	0.258666	4.27301	1.92851e-05	0.000616976
Ccdc171	608.96	-0.78597	0.184082	-4.26968	1.9575e-05	0.000624674
C77370	927.908	0.642797	0.150763	4.26363	2.01128e-05	0.000639061
Psmc3	936.788	0.755948	0.177317	4.26326	2.01469e-05	0.000639061
Lynx1	67.4475	-1.21268	0.284677	-4.25983	2.04584e-05	0.000646354
Akirin2	511	-0.702236	0.164891	-4.25879	2.05534e-05	0.000647738
Ireb2	2030.11	-0.537933	0.126628	-4.24815	2.15544e-05	0.000674659
Kctd12	268.114	-0.928187	0.218527	-4.24746	2.16206e-05	0.000674659
Negr1	2231.74	0.677991	0.159618	4.24757	2.16103e-05	0.000674659
Sp1	1549.93	-0.543678	0.12798	-4.24816	2.15534e-05	0.000674659
Rec114	30.8111	1.07344	0.253652	4.23195	2.31674e-05	0.00072115
4930578G10Rik	21.7375	1.0732	0.253896	4.2269	2.36931e-05	0.000735705
Plscr2	430.305	-0.750761	0.177889	-4.2204	2.43872e-05	0.000753565
Cfh	1191.11	-0.629036	0.149259	-4.21438	2.5046e-05	0.00077204
Prox1	1204.7	-0.554222	0.131531	-4.21364	2.51293e-05	0.000772726
Cep112	1611.9	-0.603178	0.143213	-4.21176	2.53384e-05	0.000777269
Erlec1	603.399	-0.749581	0.178191	-4.20662	2.5922e-05	0.00079134
Arhgef40	600.374	0.683505	0.162645	4.20243	2.64065e-05	0.000804191
Ablim1	5009.77	-0.548225	0.130479	-4.20164	2.64992e-05	0.000805081
Gabrb1	204.711	0.96277	0.229624	4.19281	2.75517e-05	0.000835054
Gm16039	1136.37	-0.609965	0.145643	-4.18808	2.81319e-05	0.000850604
Nr1d2	786.619	-0.603407	0.144121	-4.18679	2.82923e-05	0.000853416
Lphn1	286.385	0.808437	0.194005	4.16709	3.08518e-05	0.000928411
Pold2	156.853	1.00971	0.242633	4.16149	3.16175e-05	0.000946955
Clec1a	133.489	-1.05851	0.254448	-4.16004	3.18198e-05	0.000950768
C3	114.771	-1.14561	0.275937	-4.15172	3.29981e-05	0.000983655
Kctd9	747.031	-0.608579	0.146732	-4.14755	3.36055e-05	0.000999409
Minos1	797.913	-0.665555	0.160756	-4.14016	3.47063e-05	0.00102973
Fhod3	10521.5	-0.60314	0.146226	-4.12471	3.712e-05	0.00109621
Hspa4l	1522.73	-0.639736	0.155254	-4.12058	3.77925e-05	0.00111347
Cdk4	1193.59	0.637634	0.155093	4.11129	3.93446e-05	0.00115277
Hcn1	395.877	0.747158	0.181747	4.11097	3.93993e-05	0.00115277
Gm10339	28.1885	1.14777	0.27959	4.10519	4.03979e-05	0.00117655
Fzd6	545.958	-0.662277	0.161395	-4.10346	4.0702e-05	0.00117729
Nsg2	109.764	1.15533	0.281528	4.10378	4.06451e-05	0.00117729
Pcdh9	6275.68	0.711155	0.173303	4.10353	4.06891e-05	0.00117729
Ssbp3	2284.71	0.584804	0.142633	4.10006	4.1305e-05	0.00119201
Prrx2	144.2	0.961655	0.234696	4.09744	4.17735e-05	0.00120279
Gpc2	128.695	1.01795	0.248812	4.09123	4.29085e-05	0.00123267
Akr1b8	173.271	-0.940932	0.230089	-4.08942	4.32449e-05	0.00123419
Tgfbr3	1561.3	-0.577584	0.141238	-4.08942	4.32448e-05	0.00123419
Atf3	470.544	0.984459	0.241169	4.08204	4.46424e-05	0.00127095
Pla2g4c	21.0291	1.02404	0.25098	4.08015	4.50057e-05	0.00127843
Retsat	231.398	-0.937183	0.230068	-4.07351	4.631e-05	0.00131253
AW549877	838.61	-0.587417	0.144294	-4.07096	4.68188e-05	0.00132399
Ano4	2260.07	-0.515853	0.126741	-4.07012	4.69887e-05	0.00132584
Stard10	410.72	0.760087	0.186822	4.0685	4.73161e-05	0.0013321
Mrps27	559.067	0.644736	0.158651	4.06386	4.82668e-05	0.00135586
Perp	1901.03	-0.539044	0.132956	-4.0543	5.02847e-05	0.00140631
Entpd1	2044.74	-0.62358	0.153848	-4.05321	5.05186e-05	0.00140974
Chchd3	7116.04	-0.549416	0.135759	-4.04699	5.18813e-05	0.00144141
Hopx	1109.59	-0.760977	0.188253	-4.04232	5.29245e-05	0.00146397
9430020K01Rik	957.493	-0.56349	0.139474	-4.04011	5.34253e-05	0.00147461
Col14a1	3301.53	-0.821101	0.203585	-4.03321	5.50204e-05	0.00151205
Fzd4	424.597	-0.790624	0.196007	-4.03365	5.49167e-05	0.00151205
Fndc3a	2354.39	-0.649692	0.161482	-4.0233	5.73889e-05	0.00156737
Fkbp5	709.505	-0.786153	0.195666	-4.01784	5.87342e-05	0.00159679
Smad4	2017.42	-0.539286	0.134219	-4.01795	5.87074e-05	0.00159679
Ppara	441.302	-0.807478	0.20121	-4.01311	5.99247e-05	0.00162567
Sgcz	340.116	1.04448	0.260323	4.01226	6.01398e-05	0.00162802
Ehd2	670.393	-0.704027	0.17556	-4.01018	6.06728e-05	0.00163549
Mios	659.427	-0.610766	0.152304	-4.01017	6.06741e-05	0.00163549
Lta4h	2350.79	-0.611429	0.152894	-3.99902	6.36044e-05	0.00171084
Sh3bgrl2	241.877	-0.849274	0.212905	-3.98899	6.63559e-05	0.00178107
Lyn	812.797	-0.583217	0.146239	-3.98811	6.6601e-05	0.0017821
Pja1	652.958	0.672978	0.168757	3.98785	6.66757e-05	0.0017821
Nr3c2	1292.19	-0.604659	0.151706	-3.98573	6.72742e-05	0.00179054
Rd3	85.2635	1.05449	0.264649	3.98449	6.76249e-05	0.0017961
Gm14391	908.514	-0.549175	0.138261	-3.97203	7.12642e-05	0.00188093
Abca9	892.197	-0.581003	0.146312	-3.971	7.15727e-05	0.00188514
Bnip3l	1624.31	-0.561614	0.141483	-3.96948	7.20284e-05	0.00189321
Dynlt1f	1136.06	0.6294	0.158645	3.96734	7.26802e-05	0.00190639
Lmo7	9356.86	-0.599268	0.151151	-3.96471	7.3485e-05	0.00191955
Ppip5k2	2735.87	-0.753126	0.190155	-3.96059	7.47647e-05	0.00194896
Dct	80.9018	-1.09503	0.27726	-3.94947	7.8326e-05	0.00203133
Il18r1	47.2956	-1.07835	0.273054	-3.94922	7.84056e-05	0.00203133
Gimap4	288.033	-0.920238	0.23364	-3.9387	8.19249e-05	0.00211818
Stk39	6977.39	-0.572536	0.145512	-3.93462	8.33287e-05	0.00215008
Ceacam1	54.7579	-1.11833	0.284272	-3.93402	8.35357e-05	0.00215104
Blcap	349.536	-0.811083	0.206479	-3.92817	8.55963e-05	0.00219964
Casq2	11238.1	-0.516257	0.131516	-3.92542	8.65802e-05	0.00222041
Mstn	52.1955	1.10695	0.282086	3.92415	8.70348e-05	0.00222756
Rbl2	290.297	-0.817736	0.208442	-3.92309	8.74221e-05	0.00223156
Ahcyl1	1941.25	-0.512062	0.130695	-3.918	8.92852e-05	0.00227139
Knop1	762.1	0.597932	0.152794	3.91331	9.10398e-05	0.0023039
Mpc2	768.439	-0.704741	0.180097	-3.91313	9.11085e-05	0.0023039
Slit3	11046.6	0.70197	0.179797	3.90423	9.45249e-05	0.00238079
Acvr1c	310.906	0.781497	0.200426	3.89918	9.65186e-05	0.00242618
Etfdh	1949.41	-0.606434	0.155572	-3.8981	9.69512e-05	0.00242742
Fth1	876.307	-0.658979	0.169407	-3.88991	0.00010028	0.00249596
Nt5dc1	407.825	-0.847156	0.217778	-3.88999	0.000100247	0.00249596
Tex21	48.0878	1.10689	0.284681	3.88819	0.000100995	0.00250885
Tlr4	516.847	-0.728198	0.187522	-3.88328	0.000103058	0.00255506
Tuft1	192.149	-0.947833	0.244326	-3.87937	0.000104726	0.00258631
Tsr1	152.101	0.913838	0.235879	3.87418	0.000106983	0.0026369
Gcn1l1	860.801	0.707791	0.182742	3.87317	0.000107428	0.00264273
Pdlim7	398.397	0.674448	0.174161	3.87256	0.000107698	0.00264423
Poldip3	835.949	0.616756	0.159307	3.8715	0.000108167	0.00264549
Arhgap23	540.671	0.619704	0.16038	3.86398	0.000111555	0.00271786
Kctd12b	280.267	-0.758888	0.196727	-3.85758	0.000114516	0.00278466
Cd34	502.068	-0.70086	0.181754	-3.85609	0.000115214	0.00279361
Klhdc8b	380.838	0.802439	0.208109	3.85586	0.000115326	0.00279361
Olfml2b	847.998	-0.632875	0.164233	-3.85353	0.000116428	0.00281495
Adamts10	753.39	0.688274	0.178787	3.84969	0.000118266	0.0028485
B3gntl1	501.249	0.700901	0.182414	3.84237	0.000121853	0.00292377
1700029J07Rik	77.8603	-1.0841	0.282221	-3.84132	0.000122375	0.00293076
Cyp2d22	107.542	-0.985344	0.256668	-3.83899	0.000123542	0.00295312
Cdh5	1134.42	-0.613565	0.159859	-3.83817	0.000123953	0.00295737
Obscn	2880.53	-0.656212	0.171222	-3.83253	0.000126831	0.00302035
Tagap1	208.314	-0.833962	0.218567	-3.81559	0.000135859	0.00321718
Gdap2	457.589	-0.679058	0.178235	-3.8099	0.000139021	0.00328593
Ap3b2	86.7681	1.02788	0.270022	3.80666	0.000140858	0.00332314
Fndc1	1443.46	-0.828149	0.217824	-3.80192	0.000143581	0.00337482
Adcy1	442.768	0.929463	0.244596	3.8	0.000144697	0.00339476
Ppp1r1a	200.602	0.870432	0.229232	3.79717	0.000146356	0.00342733
Fhl2	5122.61	-0.547458	0.144286	-3.79424	0.000148095	0.00345611
Asb11	531.708	-0.886614	0.234039	-3.78832	0.00015167	0.00351924
Btnl9	300.356	-0.972075	0.256582	-3.78856	0.000151523	0.00351924
Sh3pxd2b	1082.84	-0.630367	0.166441	-3.78733	0.000152273	0.00352677
Pdhb	2074.97	-0.652721	0.172446	-3.78507	0.000153665	0.00355252
Fam212b	290.822	0.736937	0.194868	3.78172	0.000155747	0.00358756
Hif3a	968.748	-0.534676	0.14138	-3.78185	0.000155669	0.00358756
Atoh8	268.257	0.785777	0.208099	3.77598	0.000159382	0.003658
Idh3a	2565.44	-0.617108	0.163535	-3.77355	0.000160942	0.00368045
Trim55	9364.13	-0.526362	0.139487	-3.77356	0.000160937	0.00368045
Rrp7a	39.7904	1.042	0.276756	3.76504	0.000166525	0.00380127
Dcaf6	2656.73	-0.549563	0.146043	-3.76301	0.00016788	0.00382532
D3Ertd751e	324.746	-0.704724	0.187657	-3.75539	0.000173075	0.00392499
Rhbdf1	259.902	0.758004	0.202068	3.75124	0.000175963	0.00398084
Anxa1	490.689	-0.90078	0.240261	-3.74917	0.000177423	0.00400672
Dnah7a	170.773	-1.04893	0.279884	-3.74773	0.000178445	0.00402263
Fcho2	1410.23	-0.519131	0.1386	-3.74554	0.000180009	0.00404351
Nop2	377.325	0.703187	0.187866	3.74303	0.000181814	0.00406961
Pygl	675.468	-0.686072	0.183345	-3.74198	0.000182579	0.00407954
Erc2	1499.94	0.54165	0.144941	3.73703	0.00018621	0.00415333
Sh3kbp1	1891.08	-0.596938	0.160155	-3.72726	0.000193575	0.00431002
Rps2-ps6	425.085	0.652791	0.175179	3.72642	0.00019422	0.0043168
Egln1	1025.31	-0.604905	0.162362	-3.72565	0.000194814	0.00432241
Efnb2	1574.87	-0.528974	0.142061	-3.72358	0.000196418	0.00434279
Mta1	643.388	0.592874	0.159272	3.72241	0.000197332	0.00435539
Nrp2	1013.13	-0.547639	0.147173	-3.72107	0.000198383	0.00437098
Cemip	719.929	0.557337	0.149842	3.7195	0.000199619	0.00439059
Ndufa6	871.49	-0.68843	0.185469	-3.71183	0.000205764	0.00451006
Grsf1	1277.27	-0.536362	0.14468	-3.70722	0.000209546	0.00458505
Epm2a	484.694	-0.628329	0.169939	-3.69738	0.000217834	0.00474999
C1galt1	778.621	-0.548535	0.148422	-3.69579	0.000219204	0.0047553
Cd59a	200.168	-0.804918	0.217781	-3.696	0.000219021	0.0047553
Gpr116	1523.7	-0.527645	0.142823	-3.6944	0.000220408	0.00477325
Pvrl2	318.362	0.688749	0.186525	3.69254	0.000222026	0.00480009
Tuba1c	4635.14	0.629064	0.17045	3.6906	0.000223726	0.0048286
Rmdn1	911.307	-0.57097	0.154773	-3.68907	0.000225076	0.00484947
Ncs1	475.732	0.680412	0.184671	3.68446	0.000229189	0.0049297
Fbxo40	440.435	-0.834528	0.226747	-3.68044	0.00023283	0.00499952
Pcdh18	1105.9	0.518688	0.141074	3.6767	0.000236272	0.00506485
Cdc73	1531.02	-0.540881	0.147297	-3.67204	0.000240625	0.0051436
Hspa12a	409.857	-0.80787	0.220014	-3.6719	0.000240757	0.0051436
Nkiras1	14.9055	0.885918	0.241665	3.66589	0.00024648	0.005257
Fn3krp	165.099	0.879918	0.240096	3.66486	0.000247477	0.00526938
Smim13	343.912	-0.68875	0.187964	-3.66427	0.00024804	0.00527253
Gm21103	18.2992	0.920671	0.25155	3.66	0.00025222	0.00534344
Csrnp2	231.613	0.799852	0.21864	3.6583	0.00025389	0.00536984
Nmd3	647.35	-0.563014	0.153955	-3.657	0.000255186	0.00537621
Tubb2b	674.426	0.74176	0.202845	3.65678	0.000255402	0.00537621
Enox2	1188.92	-0.541107	0.148541	-3.6428	0.000269689	0.0056381
Peli2	931.668	-0.651479	0.178824	-3.64312	0.000269353	0.0056381
Slfn5	75.1918	-1.00518	0.275975	-3.64228	0.000270232	0.00564014
Gm20696	119.402	-0.905226	0.248622	-3.64098	0.000271604	0.00565946
Nudt7	213.988	-0.859951	0.237495	-3.62091	0.000293563	0.00608699
Rsad1	71.142	-0.999332	0.276205	-3.61808	0.000296795	0.00614396
Kbtbd11	58.8243	-1.02264	0.283158	-3.61155	0.000304369	0.00624968
Msi1	68.9946	0.98534	0.272745	3.61268	0.000303047	0.00624968
Sdha	4358.92	-0.618978	0.171363	-3.61209	0.000303734	0.00624968
Pld1	1433.43	-0.577081	0.159918	-3.60861	0.000307844	0.0063108
Exoc6	825.428	-0.536822	0.149082	-3.60084	0.000317192	0.00648146
Gpr137b	310.938	0.707903	0.196692	3.59904	0.000319391	0.00651589
Slc16a12	541.352	0.637436	0.177176	3.59776	0.000320974	0.00653766
Eif4a3	700.127	0.552411	0.153699	3.5941	0.000325515	0.00659832
Tagln	937.869	0.69904	0.194478	3.59444	0.000325089	0.00659832
Spata6	1094.39	-0.577503	0.160736	-3.59286	0.000327069	0.00661924
Fam210a	1676.9	-0.535927	0.149348	-3.58844	0.00033266	0.00672164
3110062M04Rik	14.3021	0.873666	0.244028	3.58018	0.000343355	0.00691569
Slc25a31	57.46	1.01594	0.284522	3.57069	0.000356045	0.00713724
Larp1b	861.917	-0.577964	0.161978	-3.56816	0.000359502	0.00719514
Plekha7	1458.99	0.527267	0.148049	3.56142	0.000368848	0.00737057
Mylk4	68.9996	-0.997474	0.280267	-3.55902	0.000372246	0.00742675
Grid1	369.864	-0.831519	0.234022	-3.55316	0.000380636	0.00757029
Sdk2	450.7	0.759864	0.214018	3.55048	0.000384535	0.00761198
Fam129a	1105.4	-0.837242	0.236144	-3.54548	0.000391905	0.00773371
Zfp788	451.839	-0.615722	0.174071	-3.53719	0.000404404	0.00793095
Tubb6	416.435	0.70137	0.198426	3.53467	0.000408277	0.00799454
Rmnd1	450.407	-0.707793	0.200323	-3.53326	0.000410476	0.00802519
Col13a1	240.847	0.71854	0.203447	3.53184	0.000412685	0.00805595
Tenm4	2496.21	0.551928	0.156353	3.53	0.000415555	0.00809949
Cped1	952.684	-0.74467	0.211021	-3.52889	0.00041731	0.0081212
Ssr2	739.81	0.557921	0.158139	3.52803	0.00041866	0.00813497
Gid4	484.866	-0.585311	0.166013	-3.52569	0.000422381	0.00819471
Fbln1	1124.55	0.554308	0.157355	3.52266	0.000427233	0.00827616
Ctbs	13.9933	0.835485	0.237665	3.51539	0.000439117	0.00848044
Syndig1	392.517	0.790352	0.225098	3.51115	0.000446168	0.0086035
Papss2	334.363	0.753308	0.21463	3.5098	0.000448449	0.0086333
Epha6	116.323	0.952495	0.271711	3.50554	0.000455685	0.00874709
Cdhr3	68.2517	-0.879231	0.250908	-3.50419	0.000457994	0.00877811
Sfrp2	223.867	0.811859	0.231713	3.50373	0.000458788	0.00878004
Rassf9	144.3	-0.976945	0.279064	-3.50079	0.00046388	0.0088641
Foxp4	260.597	0.708817	0.20275	3.49602	0.000472248	0.00899686
Dsg2	379.048	-0.630858	0.180575	-3.4936	0.000476561	0.00903892
Gm14305	466.771	-0.677271	0.193906	-3.49278	0.000478023	0.00903892
Vwc2	166.567	0.957721	0.274177	3.49307	0.000477498	0.00903892
Gm20938	16.2161	-0.854483	0.24497	-3.48812	0.000486434	0.00915696
St8sia4	218.504	-0.799404	0.229137	-3.48876	0.000485263	0.00915696
Camk2b	118.348	0.870171	0.249842	3.48288	0.00049605	0.00932413
Zfp36l2	142.105	-0.878894	0.25276	-3.47719	0.000506693	0.00951007
Bmp7	634.584	0.652635	0.187779	3.47555	0.000509809	0.00954028
Ehd3	150.776	0.821642	0.236397	3.47569	0.000509534	0.00954028
Limk2	867.556	0.505089	0.145415	3.47342	0.000513861	0.00960193
Rsph1	52.5771	-0.908369	0.262084	-3.46594	0.000528378	0.00984415
Acsl4	983.948	-0.580198	0.167518	-3.46351	0.000533186	0.00991913
Ddo	316.603	-0.694819	0.200713	-3.46175	0.000536667	0.00995918
Slc1a2	95.0468	0.908924	0.262571	3.46163	0.000536911	0.00995918
Lztr1	687.086	0.519708	0.150194	3.46026	0.000539657	0.00999548
Pilrb2	14.886	0.816563	0.236069	3.459	0.000542192	0.0100278
Tle3	412.622	0.620802	0.1795	3.45851	0.000543173	0.0100313
Perm1	91.0709	-0.978699	0.283167	-3.45626	0.000547723	0.0100859
6030498E09Rik	168.816	0.834938	0.241737	3.45391	0.00055252	0.0101595
Sgk1	359.317	-0.710751	0.206007	-3.45013	0.000560314	0.0102433
Cmtm8	69.671	-0.974379	0.282762	-3.44594	0.000569082	0.0103737
Lekr1	575.66	-0.650826	0.18901	-3.44334	0.000574569	0.0104555
Zfp960	474.39	0.600093	0.17465	3.43597	0.00059043	0.0106859
Dgki	775.043	0.759584	0.221334	3.43184	0.000599507	0.0108193
Hey2	757.401	-0.792398	0.230979	-3.4306	0.000602248	0.0108533
Tmem178	153.713	0.855556	0.249526	3.42872	0.000606437	0.0109133
Slc10a6	136.504	-0.889312	0.260237	-3.41732	0.000632413	0.0113325
Mfap5	237.125	-0.859332	0.251625	-3.41512	0.000637533	0.011392
Sepw1	443.735	0.646164	0.189199	3.41525	0.000637229	0.011392
Yipf7	171.485	-0.834686	0.244748	-3.41039	0.000648708	0.011559
Art3	998.523	-0.51171	0.150319	-3.40417	0.000663663	0.0117594
Ppp3r1	315.562	-0.643864	0.189131	-3.40433	0.000663255	0.0117594
Kcnj8	121.604	-0.88618	0.260487	-3.40202	0.000668905	0.0118357
Myo5b	215.413	-0.904007	0.266906	-3.38698	0.000706653	0.0124169
Naga	215.85	0.71674	0.211876	3.38283	0.000717431	0.0125888
Gm14419	478.298	-0.564072	0.167013	-3.37741	0.000731717	0.012804
Sin3b	981.537	0.505399	0.149892	3.37175	0.00074693	0.0130157
Xrcc1	356.565	0.658899	0.195445	3.37127	0.000748231	0.0130157
Parp4	463.973	-0.592237	0.176337	-3.35855	0.000783511	0.013542
Prrg3	519.443	-0.592063	0.176266	-3.35892	0.000782489	0.013542
Fam124a	153.001	0.7734	0.230604	3.35379	0.000797117	0.0137239
Dnah8	262.553	-0.932718	0.278331	-3.35111	0.000804875	0.013817
Zfp184	198.896	0.717487	0.214492	3.34505	0.000822675	0.0140905
Col6a6	2057.97	0.593387	0.177696	3.33934	0.000839785	0.0143386
Rnase4	390.271	-0.6188	0.185336	-3.33881	0.000841385	0.0143466
Gm21598	15.2519	-0.80371	0.240817	-3.33743	0.000845575	0.0143986
Mrps30	346.379	-0.613306	0.184077	-3.33179	0.000862892	0.0146331
Proser2	148.033	-0.810426	0.243266	-3.33144	0.000863964	0.0146331
Pnrc1	360.768	-0.626797	0.188271	-3.32922	0.00087089	0.0147111
Tmem100	106.901	-0.853326	0.256418	-3.32787	0.000875131	0.014763
Lrrc3b	588.243	-0.572275	0.172027	-3.32665	0.000878969	0.0148081
Slc28a1	22.6568	0.891006	0.267877	3.32617	0.000880474	0.0148137
Sod2	1619.15	-0.566746	0.170656	-3.32099	0.000896982	0.0150714
Acot13	473.315	-0.684441	0.206125	-3.32052	0.000898491	0.0150768
Enpp2	726.669	-0.751014	0.226245	-3.31947	0.00090187	0.0151135
Pfdn6	161.437	0.806828	0.243174	3.3179	0.000906959	0.0151587
Man2b1	450.97	0.590499	0.178162	3.31439	0.000918438	0.0153101
Pptc7	617.521	-0.603358	0.182386	-3.30814	0.000939191	0.0155612
Sec13	903.306	0.545032	0.164762	3.308	0.000939639	0.0155612
Spata18	47.7612	-0.865597	0.261834	-3.3059	0.000946732	0.0156174
Gm2004	413.789	-0.572114	0.173295	-3.30139	0.000962057	0.0157846
Irak1bp1	122.457	0.883425	0.267675	3.30037	0.000965588	0.0157846
Pigt	186.24	0.769687	0.233177	3.30087	0.000963849	0.0157846
Pnpla6	334.161	0.654809	0.198296	3.30218	0.000959379	0.0157846
Ranbp3	718.152	0.563014	0.170543	3.3013	0.000962374	0.0157846
Thnsl1	149.245	0.769903	0.233895	3.29167	0.000995959	0.0162391
Cep128	1098.5	-0.630311	0.191546	-3.29065	0.000999554	0.0162559
Pop4	312.598	-0.63275	0.192502	-3.28698	0.00101269	0.0163854
Gm3298	40.083	0.934488	0.284579	3.28376	0.00102433	0.0165213
Asah2	514.996	-0.542298	0.165173	-3.2832	0.00102635	0.016522
Gli2	1301.81	0.633066	0.192901	3.28182	0.0010314	0.0165822
Tlr3	66.6599	-0.909795	0.277346	-3.28036	0.00103676	0.0166473
Plekhg2	297.38	0.640889	0.195613	3.27632	0.0010517	0.0168445
Unc5d	163.336	0.806125	0.246686	3.26782	0.00108379	0.0173365
L3hypdh	146.3	-0.810812	0.248612	-3.26135	0.00110883	0.0176924
Gnptg	74.233	0.881665	0.270472	3.25973	0.00111519	0.0177714
Edem1	464.265	-0.559417	0.171746	-3.25724	0.00112501	0.0178616
Mt1	157.561	-0.875224	0.268711	-3.25712	0.00112551	0.0178616
Rpl8	1851.24	0.583345	0.17924	3.25454	0.00113576	0.0179862
Adamtsl3	762.193	-0.737913	0.226864	-3.25267	0.00114328	0.018076
Ptn	6172.05	0.514301	0.158129	3.25242	0.00114429	0.018076
Gpr85	88.3348	0.855196	0.263053	3.25104	0.00114985	0.0181342
Lppr4	50.1735	-0.920433	0.283202	-3.25009	0.00115368	0.0181342
Nr2f1	160.179	0.781996	0.240608	3.25009	0.0011537	0.0181342
Ly6a	27.2063	-0.872427	0.268483	-3.24947	0.00115622	0.0181513
Adat2	58.2158	0.903108	0.278402	3.2439	0.00117904	0.0184411
D16Ertd472e	190.664	-0.749114	0.231536	-3.23541	0.00121468	0.0188869
Atp5j	1310.53	-0.557771	0.172453	-3.23433	0.00121927	0.0189301
Ppil1	366.455	0.675422	0.208979	3.23201	0.00122923	0.0190613
Esrrg	5573.37	-0.523066	0.161902	-3.23075	0.00123464	0.0191145
Vsnl1	600.673	0.706672	0.218749	3.23051	0.00123568	0.0191145
Slc12a2	1597.84	-0.523824	0.162265	-3.22821	0.0012457	0.0192406
Stmn1	1380.45	0.530788	0.164436	3.22794	0.00124687	0.0192406
Ntsr1	271.331	0.701649	0.217422	3.22713	0.0012504	0.0192464
Trabd	346.868	0.644934	0.199867	3.22681	0.0012518	0.0192464
Sclt1	759.081	-0.501327	0.15543	-3.22542	0.00125787	0.0193162
Gm6356	21.3934	-0.873012	0.270731	-3.22465	0.00126126	0.019345
Osbpl8	5287.47	-0.557152	0.172951	-3.22144	0.00127547	0.0194698
Bpnt1	335.308	0.61081	0.189676	3.22028	0.00128067	0.0195245
Gm3424	15.3578	0.816858	0.253777	3.21881	0.00128725	0.0195777
Pts	292.036	-0.623284	0.193793	-3.21623	0.00129885	0.0197266
Acad12	72.4029	0.877187	0.27343	3.20809	0.0013362	0.0202492
Grik5	263.349	0.647913	0.202122	3.20556	0.00134801	0.0204038
Ndst3	425.074	0.70089	0.21872	3.20451	0.00135291	0.0204535
Fam154b	55.4757	-0.8565	0.267844	-3.19775	0.00138503	0.0208892
Pou6f2	210.735	0.69072	0.216329	3.19291	0.00140845	0.0211669
Tinagl1	94.2526	-0.867102	0.27165	-3.19198	0.00141299	0.02121
Edf1	212.437	0.712544	0.223313	3.19078	0.00141887	0.0212661
Yes1	1038.98	-0.50886	0.159546	-3.18943	0.00142552	0.0213222
Ptgr2	1247.44	-0.536723	0.168404	-3.18712	0.00143695	0.0214679
Metap1d	365.878	0.577272	0.181298	3.18411	0.00145199	0.0215469
Tmem232	110.29	-0.905335	0.284465	-3.18259	0.00145962	0.0216279
Arvcf	239.206	0.763667	0.240089	3.18077	0.00146885	0.0217394
Ago1	390.458	-0.595543	0.187622	-3.17417	0.00150268	0.022214
Scara5	137.128	-0.888887	0.28041	-3.16996	0.00152462	0.022486
Klf9	186.048	-0.738841	0.233179	-3.16856	0.00153197	0.0225681
Ap4s1	279.288	-0.621564	0.19645	-3.16397	0.00155631	0.0228087
Cenpu	13.0616	0.718494	0.227078	3.16409	0.0015557	0.0228087
Fgf13	7410.47	-0.572371	0.180993	-3.1624	0.00156476	0.0228387
Gprasp2	441.3	0.560126	0.177087	3.163	0.00156155	0.0228387
Samd9l	183.97	-0.718747	0.227258	-3.16269	0.00156316	0.0228387
Hps3	346.241	-0.581046	0.183819	-3.16098	0.00157241	0.0229239
Slc25a37	380.023	-0.561938	0.177923	-3.15831	0.00158685	0.0230548
Rasgrp3	807.137	-0.556124	0.176271	-3.15494	0.0016053	0.0232962
Atp1b4	38.1251	-0.89611	0.284194	-3.15317	0.00161509	0.0234114
Kdsr	405.784	-0.563269	0.178869	-3.14906	0.00163799	0.0236891
Cdh8	202.019	0.80962	0.257229	3.14747	0.00164692	0.0237911
Fads2	317.121	0.621294	0.197629	3.14374	0.00166802	0.0239887
Sh3glb2	374.538	0.654073	0.208151	3.1423	0.00167627	0.0240778
Scarf2	156.974	0.775133	0.247062	3.1374	0.00170451	0.0243719
Zfp52	152.109	-0.731135	0.233148	-3.13592	0.00171314	0.0244411
Lpar4	523.468	-0.505984	0.161602	-3.13106	0.00174179	0.0247209
Mcm5	668.369	0.518312	0.165614	3.12964	0.0017502	0.0248024
Cd38	278.721	-0.671872	0.214799	-3.12791	0.00176054	0.0248932
Gm13157	115.341	0.810055	0.258966	3.12804	0.00175979	0.0248932
Zfp758	357.609	-0.607863	0.194508	-3.12512	0.0017773	0.0251021
Nabp1	282.937	-0.686525	0.219819	-3.12314	0.00178934	0.025244
Pdpn	234.75	-0.695097	0.222695	-3.12129	0.00180059	0.0253745
Hmbs	362.77	0.609935	0.195494	3.11997	0.00180867	0.0254601
Gps1	585.545	0.52393	0.167982	3.11898	0.0018148	0.025518
Rpgrip1l	495.363	-0.594268	0.190665	-3.11682	0.00182812	0.0256768
Dst	287.29	-0.604688	0.19422	-3.11341	0.00184937	0.0259178
Fam64a	248.037	0.702496	0.225674	3.11288	0.00185273	0.0259362
Kbtbd12	354.429	-0.644056	0.206927	-3.11248	0.00185524	0.0259426
Stil	468.627	-0.568362	0.182722	-3.11053	0.0018675	0.0260854
Fgfbp1	23.6475	-0.802482	0.258261	-3.10725	0.00188838	0.0263377
Tmem71	200.75	-0.817426	0.263116	-3.10671	0.00189181	0.0263377
Smpx	4005.83	-0.508414	0.163885	-3.10227	0.00192045	0.0267071
Rpl18	1167.5	0.640944	0.20669	3.101	0.0019287	0.0267882
S1pr2	247.616	0.624676	0.201637	3.09803	0.00194812	0.0269256
Zfp61	172.58	0.739161	0.2386	3.09791	0.00194891	0.0269256
Pdk1	3311.67	-0.516422	0.166729	-3.09738	0.00195238	0.0269441
Sel1l2	26.7023	-0.848595	0.274236	-3.0944	0.00197213	0.0271576
Tpgs2	11.6546	0.694117	0.224592	3.09057	0.00199771	0.0274501
Amph	76.4031	-0.875694	0.283885	-3.08468	0.00203772	0.0278789
Fabp12	33.8654	0.865936	0.281268	3.07868	0.00207918	0.0283099
Pde8a	470.03	-0.518029	0.168273	-3.07851	0.00208039	0.0283099
6030458C11Rik	493.306	0.513978	0.167036	3.07704	0.00209064	0.0283277
Cacna1h	643.526	0.563494	0.183116	3.07726	0.00208914	0.0283277
Tnfrsf25	18.7669	0.819701	0.266351	3.07752	0.0020873	0.0283277
Pdlim1	609.934	-0.521076	0.169418	-3.07568	0.00210023	0.0284272
Gtpbp1	396.736	0.557921	0.18149	3.07412	0.00211127	0.0285157
Col6a3	4712.64	-0.642669	0.2091	-3.07349	0.00211568	0.0285448
Oprl1	68.4726	0.874661	0.28467	3.07255	0.00212242	0.0285772
Tob1	138.506	-0.771634	0.251173	-3.07212	0.00212541	0.0285848
Cd44	1032.26	-0.514269	0.167496	-3.07033	0.00213824	0.0286963
Adam22	1409.34	0.519205	0.169204	3.06851	0.00215131	0.0288412
Apoo	767.232	-0.501972	0.16366	-3.06717	0.00216096	0.0289399
Synpo2l	1110.9	-0.511574	0.166817	-3.06668	0.0021645	0.0289567
Stc2	237.285	-0.692438	0.225863	-3.06575	0.00217125	0.0290146
Zfp286	282.957	0.609756	0.198912	3.06545	0.00217341	0.0290146
Gm2163	37.5918	0.866871	0.283281	3.06011	0.00221256	0.0294133
Tcap	294.373	0.709956	0.231986	3.06034	0.00221089	0.0294133
Tm4sf1	1434.57	-0.522417	0.170741	-3.05969	0.00221563	0.0294232
Smpd4	511.795	0.514178	0.168211	3.05675	0.00223755	0.0296522
Tomm34	443.048	0.523765	0.171486	3.05428	0.00225604	0.0298349
Ids	237.679	-0.702299	0.230181	-3.05108	0.00228022	0.0300487
Ntn1	1258.5	-0.668357	0.219131	-3.05003	0.00228816	0.0300712
Aplnr	427.984	-0.554129	0.181847	-3.04723	0.00230961	0.0302903
Nelfcd	377.511	0.668822	0.21948	3.0473	0.00230904	0.0302903
Rps19	1990.24	0.542534	0.178316	3.04254	0.0023459	0.0306079
Wdr61	486.219	0.573189	0.188585	3.03942	0.00237036	0.0308458
AK129341	221.241	-0.775883	0.255556	-3.03606	0.00239694	0.0310499
Pfdn5	722.197	0.538252	0.177466	3.03299	0.00242142	0.031335
Hmgn5	81.4969	-0.82707	0.272745	-3.03239	0.00242627	0.0313629
Recql	30.9656	0.762084	0.251338	3.03211	0.00242853	0.0313629
Psma8	66.0248	0.840814	0.277354	3.03155	0.002433	0.0313808
Slc27a4	297.881	0.623228	0.205596	3.03132	0.00243487	0.0313808
Eif3i	724.358	0.519256	0.171358	3.03024	0.00244361	0.0314614
Zmat1	284.207	-0.613888	0.20276	-3.02766	0.00246456	0.0316347
Galntl6	191.608	0.835287	0.276148	3.02477	0.00248818	0.0318734
Edil3	1053.16	0.558319	0.185088	3.0165	0.00255709	0.0326571
Ier5	161.832	0.714892	0.237251	3.01323	0.00258483	0.0329781
Adcy3	11.053	0.668025	0.22183	3.01143	0.00260022	0.0330537
Bex2	44.2025	0.85685	0.284598	3.01073	0.00260617	0.0330537
Fez2	489.228	-0.541921	0.179981	-3.01099	0.00260396	0.0330537
Il15ra	128.057	-0.754089	0.250469	-3.01071	0.00260641	0.0330537
Klf15	187.537	-0.673066	0.223457	-3.01206	0.00259481	0.0330537
Zscan21	407.137	0.525945	0.174656	3.01132	0.00260117	0.0330537
Ptbp1	290.031	0.609362	0.202549	3.00846	0.00262573	0.0332321
Pax3	17.0147	-0.765531	0.254647	-3.00624	0.002645	0.0334093
Adam33	260.078	0.715774	0.238192	3.00503	0.00265552	0.0335087
Ccdc62	96.2276	-0.785422	0.261661	-3.00167	0.00268499	0.0337805
1700109H08Rik	268.636	0.640404	0.213576	2.99848	0.00271332	0.0340684
Ankrd6	299.919	-0.586626	0.195785	-2.99627	0.00273302	0.0341407
Cacna1e	135.858	-0.840403	0.28059	-2.99512	0.00274333	0.0341407
Gm14295	668.341	-0.592359	0.197622	-2.99743	0.00272264	0.0341407
Mdga1	195.125	-0.669262	0.223392	-2.99591	0.00273626	0.0341407
Nek10	81.353	-0.816423	0.272563	-2.99536	0.00274122	0.0341407
Zfp334	459.515	0.501759	0.167501	2.99557	0.00273936	0.0341407
Atpaf2	353.045	0.565749	0.188927	2.99453	0.00274864	0.0341732
Col20a1	81.986	0.810777	0.271311	2.98837	0.00280473	0.0347543
Psmb6	710.028	0.544848	0.182334	2.98819	0.00280635	0.0347543
Nt5e	449.033	-0.555448	0.185969	-2.98678	0.00281935	0.0348812
Eif1	617.553	-0.57378	0.192187	-2.98553	0.00283084	0.0349551
Mndal	64.9849	-0.826267	0.276748	-2.98563	0.00282999	0.0349551
Btg2	466.304	0.564342	0.189368	2.98013	0.00288125	0.0354639
Vamp5	196.436	0.679249	0.228136	2.97739	0.00290717	0.0357234
Gm5458	18.1194	0.785652	0.263979	2.97619	0.00291852	0.0357936
Zfp654	442.016	-0.532079	0.179132	-2.97032	0.00297493	0.0363311
Fam13c	549.953	-0.561069	0.189037	-2.96804	0.00299708	0.0363414
Oasl2	20.7993	-0.796266	0.268233	-2.96856	0.00299201	0.0363414
Wbp1	265.746	0.677105	0.228136	2.96798	0.00299762	0.0363414
Gpr153	335.492	0.557848	0.188082	2.96598	0.00301723	0.0365339
Slc35c2	116.272	0.743252	0.25061	2.96577	0.00301926	0.0365339
She	322.598	-0.588223	0.198371	-2.96527	0.00302422	0.036559
Rps5	2349.61	0.572779	0.193438	2.96104	0.00306599	0.0369933
Gata5	95.3763	0.771938	0.260788	2.96002	0.00307621	0.037034
Cyp39a1	585.496	-0.515708	0.174651	-2.95279	0.00314915	0.0376846
Tmem200a	91.2328	0.83981	0.284421	2.9527	0.00315005	0.0376846
Frzb	180.417	-0.676116	0.229011	-2.95233	0.00315383	0.0376942
Gnb5	373.647	0.554771	0.188014	2.95069	0.00317062	0.0377524
Gm2244	14.0264	0.745893	0.252903	2.94933	0.00318469	0.0378843
Dpp10	65.5358	0.827932	0.280811	2.94836	0.00319462	0.0379668
Spata1	151.364	-0.837445	0.284399	-2.94462	0.00323356	0.0382502
Uchl5	358.927	-0.545957	0.185486	-2.94339	0.00324637	0.0383659
Mettl24	211.983	-0.660212	0.224496	-2.94087	0.00327295	0.038608
Rfxank	78.6913	0.784351	0.266786	2.94	0.00328209	0.0386798
Zyx	477.427	0.508864	0.17318	2.93835	0.00329962	0.0388142
Gm3604	82.343	0.787763	0.268329	2.93581	0.00332679	0.038989
Arhgdib	189.784	0.656921	0.223849	2.93466	0.00333911	0.0390611
Lmbrd2	461.348	-0.502118	0.171166	-2.93352	0.00335144	0.0391692
Scd4	211.125	-0.635608	0.216706	-2.93304	0.00335665	0.0391939
Tmed5	14.8295	-0.662514	0.226477	-2.9253	0.0034412	0.0400703
Rassf1	228.665	0.614962	0.210391	2.92295	0.00346737	0.040338
Hdgfrp2	375.394	0.536429	0.183846	2.91782	0.00352485	0.040931
Enpp1	749.941	0.518029	0.177643	2.91613	0.00354406	0.0410418
Tmem214	403.798	0.543609	0.186406	2.91627	0.00354242	0.0410418
Rccd1	151.219	0.683813	0.234518	2.91582	0.00354753	0.0410445
Nrcam	188.42	-0.816932	0.280435	-2.91309	0.00357869	0.0412919
Abca8b	414.167	-0.54267	0.186485	-2.91	0.0036143	0.0416647
Tmem234	130.584	0.738416	0.253795	2.9095	0.00362012	0.0416939
Trmt2a	131.742	0.769795	0.265002	2.90487	0.0036741	0.0422388
Ftl1	2058.68	0.540434	0.18613	2.90353	0.00368978	0.0422656
Gm8246	13.5334	0.716772	0.246839	2.90381	0.00368654	0.0422656
Sfmbt2	291.543	-0.637102	0.219385	-2.90404	0.00368386	0.0422656
Tmem144	366.588	-0.598347	0.206054	-2.90383	0.00368626	0.0422656
Gm13212	107.105	-0.74562	0.25687	-2.90272	0.00369939	0.0422993
Rgs17	149.401	0.762915	0.263027	2.90052	0.00372542	0.0424818
Lipo4	12.9416	-0.689307	0.237727	-2.89957	0.00373677	0.042573
Tc2n	149.385	-0.825183	0.284662	-2.89881	0.00374577	0.0426372
Sh3gl1	316.494	0.546266	0.188648	2.89569	0.0037833	0.0429871
Ipo4	325.019	0.571908	0.197663	2.89335	0.00381154	0.0432692
3110007F17Rik	461.108	-0.50026	0.172979	-2.89202	0.00382774	0.0434141
Lbp	117.219	-0.76751	0.266089	-2.88441	0.00392153	0.0443588
Adgb	63.3358	-0.743978	0.258361	-2.8796	0.00398174	0.0449596
Pgd	321.513	-0.627203	0.218161	-2.87496	0.00404081	0.0455049
Ddx39	213.286	0.747131	0.25995	2.87413	0.00405141	0.0455706
Cdkn1a	68.5708	-0.803617	0.280023	-2.86982	0.00410706	0.0460871
Wdr83	35.8226	0.809674	0.282211	2.86904	0.00411721	0.0461193
Taf6	261.773	0.571236	0.199143	2.86846	0.00412471	0.0461625
Acss2	12.8309	-0.645226	0.225077	-2.86669	0.0041479	0.0463021
Zfp251	421.132	0.501271	0.174929	2.86557	0.00416261	0.0464227
Lyst	1780.17	-0.522066	0.182276	-2.86415	0.0041813	0.0465491
Hs3st5	286.523	0.692546	0.242186	2.85957	0.00424217	0.0468621
Nt5c3b	80.1878	0.769751	0.269163	2.8598	0.00423912	0.0468621
Klf4	61.1687	-0.801105	0.28023	-2.85874	0.00425326	0.0469378
Ahnak2	97.1548	-0.747545	0.261752	-2.85593	0.00429115	0.0471505
Olfr78	35.1684	-0.811715	0.284216	-2.85598	0.00429044	0.0471505
Cpxm1	214.21	0.652077	0.228719	2.85099	0.00435835	0.047806
Timm17b	166.134	0.692303	0.243139	2.84735	0.00440842	0.0482716
Hdac11	316.941	0.538847	0.189265	2.84705	0.0044127	0.0482767
AI317395	37.2682	-0.809325	0.284447	-2.84526	0.00443756	0.048465
Gm10073	30.4261	-0.759287	0.266981	-2.84398	0.00445545	0.0485767
Prmt2	428.339	0.510322	0.179609	2.8413	0.00449302	0.0489442
Pyurf	148.678	-0.670372	0.236179	-2.8384	0.00453396	0.0493477
Fam175a	300.758	-0.565131	0.199208	-2.83688	0.00455563	0.049541
Zfp641	97.699	-0.733632	0.258724	-2.83558	0.0045743	0.0496588
Cd1d2	42.2152	0.805068	0.284089	2.83386	0.00459893	0.0498407
