# Supplementary material for: Quantitative trait and transcriptome analysis of genetic complexity underpinning cardiac interatrial septation in mice using an advanced intercross line
Source: eLife. 2023 Jun 5;12:e83606. doi: 10.7554/eLife.83606 (PMC10284603; doi:10.7554/eLife.83606)
Supplement: Supplementary file 8. [file elife-83606-supp8.xlsx]

## Sheet: DEGs_inQTL
Supplementary File 8: Counts of variants associated with DEGs or non-DEGs according to indicated genomic feature
gene_id	enhancers_50Kb	promoters	fUTRs	exons	introns	tUTRs
Cnn1	0	0	0	0	0	0
Kmt2a	2	10	0	44	503	17
Ppan	2	6	1	7	7	1
Wwox	33	8	0	22	1458	12
Pax3	6	1	0	1	200	1
Spc25	0	5	4	25	96	7
Agrp	0	0	0	0	4	0
Pdk1	72	41	0	114	361	84
Slc4a3	6	7	1	22	52	20
Runx1t1	27	3	0	4	349	2
Zfp184	0	0	0	0	1	0
Rplp1	16	21	1	4	20	2
Pou6f2	0	3	0	2	213	0
Slc9a5	0	0	0	0	0	0
Gata5	0	0	0	0	0	0
Atp5e	0	3	1	5	5	1
Nelfcd	0	33	1	10	96	1
Tubb1	2	10	0	2	31	0
Ddc	114	15	0	6	196	0
Kremen1	13	9	0	17	108	16
Tns3	241	32	0	69	914	8
Igfbp3	2	3	2	8	13	6
Adcy1	25	0	0	8	408	4
Limk2	7	4	0	3	36	0
Ogdh	0	1	1	2	31	0
Myl7	23	0	0	0	0	0
Pold2	5	10	1	7	16	0
Pgam2	0	1	0	1	0	0
Ryr2	44	0	0	16	1401	0
Amph	1	0	0	24	1028	13
Fth1	0	0	0	0	0	0
Fads2	0	0	0	0	4	0
Ehd1	115	9	0	20	116	19
Tjp2	2	0	0	4	331	2
Pacs1	0	0	0	0	18	0
Pip5k1b	177	13	0	15	1825	1
Apba1	3	2	0	19	1016	18
Lrp5	30	7	0	31	417	31
Drap1	0	0	0	0	0	0
Vldlr	0	1	0	2	4	1
Prdx5	0	0	0	0	0	0
Plcb3	0	0	0	0	0	0
Mark2	0	0	0	0	5	0
Acadl	2	5	0	9	57	5
Khdrbs2	0	19	0	26	2110	23
Dst	82	26	2	70	1784	4
Fn1	0	0	0	0	2	0
Des	19	6	0	13	31	4
Dnpep	11	16	2	5	12	0
Obsl1	0	15	0	16	33	0
Epha4	83	1	0	41	565	24
Mrpl44	0	4	1	2	4	0
Stk39	6	1	1	1	34	0
Bfsp1	2	11	1	11	457	0
Cst3	1	1	0	7	12	4
Ntsr1	0	0	0	0	6	0
Kcnq5	0	2	1	4	2190	2
Rmdn1	0	5	0	8	93	5
Rps20	0	6	0	9	3	8
Spaca1	0	7	1	6	69	1
Akirin2	0	0	0	0	0	0
Hsdl2	0	0	0	0	2	0
Alad	0	0	0	0	0	0
Fam219a	0	3	0	2	44	2
Cntfr	32	11	3	7	57	1
Vcp	5	52	2	38	256	7
Mllt3	0	0	0	0	6	0
Fggy	57	40	2	6	1048	0
Nudt7	0	24	21	25	44	1
Cdh5	0	0	0	0	3	0
Pvrl1	76	0	0	1	99	1
Srpr	0	0	0	0	7	0
Alg9	4	61	3	26	718	12
Cryab	0	9	1	2	21	0
Pts	7	19	0	5	120	3
Tagln	2	4	2	6	20	4
Dscaml1	33	3	0	27	3824	0
Mpzl2	6	10	3	29	85	25
Ddx6	6	8	1	22	239	17
Hmbs	8	21	2	13	82	3
Mcam	21	11	1	21	25	14
Carm1	0	0	0	0	0	0
Dock6	0	0	0	0	0	0
Rp9	0	9	0	0	37	0
Tle3	15	8	1	18	55	9
Tpm1	13	16	1	21	71	5
Aph1b	0	5	1	12	43	8
Dis3l	1	17	11	27	203	1
Smad3	175	10	2	8	320	6
Pygm	3	15	1	6	40	1
Chpf	0	1	0	5	5	2
Terf2ip	0	0	0	0	0	0
Znrf1	0	0	0	0	2	0
Bai3	0	10	4	25	1993	0
Mtss1l	0	0	0	0	0	0
Klf9	0	1	1	2	48	1
Ppp3r1	12	28	6	26	460	6
Sik3	340	47	0	27	2128	14
Cmip	5	0	0	9	99	8
Pik3ip1	4	2	0	0	4	0
Sidt2	6	66	2	20	127	5
Igfbpl1	0	0	0	0	1	0
Aldh1b1	0	0	0	0	0	0
Frmpd1	15	0	0	1	87	0
Dagla	6	0	0	0	17	0
Pknox2	64	11	0	7	742	3
Rusc2	64	94	13	81	347	16
Smad6	11	0	0	2	31	0
Susd1	0	0	0	0	20	0
Lpar1	63	9	2	3	240	0
Gcnt1	16	0	0	0	3	0
Zfhx3	3	1	2	3	32	0
Timm8b	0	9	1	1	4	0
Prune2	56	0	0	109	2268	38
Zfp292	0	0	0	0	1	0
Zfp609	1	2	1	2	21	1
Slc26a7	31	8	0	4	410	0
Rims1	0	1	0	1	857	1
Coro2b	237	17	0	4	640	0
Tram2	56	10	0	5	127	0
Metap1d	0	18	0	26	684	4
Znrf3	5	1	1	11	157	8
Sln	0	1	0	0	0	0
Bend6	0	3	1	4	66	1
Lyn	5	3	0	7	466	2
Rbm7	0	2	0	4	16	2
S1pr2	12	1	0	0	10	0
Cep164	49	27	2	56	679	9
Nxpe4	1	1	1	1	19	0
Shb	4	1	0	0	12	0
Lingo2	0	3	3	4	713	1
Chrm3	0	15	2	8	1330	3
Rpl37a	0	0	0	0	0	0
Rapgef4	274	54	5	28	3380	0
Fbxl22	0	0	0	0	0	0
AI314180	10	32	0	24	631	14
Vwc2	0	3	0	1	72	0
Actn2	8	2	1	1	25	0
Trpm3	3	8	0	9	4133	3
Adamts18	0	4	0	2	440	0
4930578G10Rik	0	1	1	7	520	0
Sugct	0	0	0	1	559	0
Tmem245	0	0	0	1	5	1
Tns1	282	14	2	3	677	0
Lgals8	1	55	6	7	123	1
Rps18-ps3	0	0	0	0	0	0
Camk2b	6	0	0	5	216	1
Hist1h1b	0	0	0	0	0	0
Hnrnpa3	0	0	0	0	0	0
Uqcr10	10	4	0	4	6	1
Olfr39	0	0	0	0	0	0
Ndufs8	5	9	2	4	18	0
Gm10073	0	0	0	0	0	0
Hist1h4i	0	2	0	4	0	3
Myl1	8	16	3	11	110	5
Hist1h2bk	0	1	0	0	0	0
Gm8730	0	1	0	0	0	0
Hist1h4k	0	1	0	1	0	0
Cdc26	0	0	0	1	3	1
Fxyd6	39	17	4	14	280	8
Olfr872	0	2	0	0	15	0
Col4a4	0	0	0	1	8	1
Hist1h4j	27	11	1	6	0	1
Slc22a27	0	0	0	0	1	0
Gm11808	0	0	0	1	0	1
Hist1h2bj	0	2	0	3	0	0
Hist1h2br	3	0	0	0	0	0
Hist1h4n	0	3	0	1	0	0
Hist1h4m	7	0	0	0	0	0
Hist1h2bq	0	0	0	0	0	0
Hist1h2bp	15	4	0	3	5	2
Ahnak	1	0	0	0	1	0
Klhl9	0	0	0	1	0	1
Hnrnpul2	0	0	0	0	0	0
Gm13305	0	0	0	0	0	0
Gm13306	0	0	0	0	0	0
Gm13304	0	0	0	0	0	0
Ccl27a	7	37	2	8	28	1
Il11ra1	23	61	7	31	584	2
Slc22a29	0	0	0	0	3	0
Il11ra2	0	0	0	0	0	0
Gm20938	0	0	0	0	0	0
Gm20878	0	0	0	0	0	0
Gm14420	0	0	0	0	0	0
Gm14410	0	0	0	0	1	0
Gm14419	0	0	0	0	0	0
Gm14295	0	0	0	0	0	0
Gm14305	0	0	0	0	1	0
Gm14308	0	0	0	0	0	0
Gm14434	0	0	0	0	0	0
Gm2026	0	0	0	0	0	0
Gm14288	0	0	0	0	0	0
Gm4724	0	0	0	0	0	0
Gm4723	0	0	0	0	0	0
Gm4631	0	0	0	0	0	0
Gm14440	0	0	0	0	0	0
Gm14443	0	14	1	10	40	6
Gm14391	0	0	0	0	0	0
Gm8898	0	0	0	0	0	0
Gm14435	0	0	0	0	0	0
Gm14399	0	40	0	13	137	5
Gm21598	0	0	0	0	0	0
Hist1h2bl	0	6	0	0	0	0
Gm11007	0	0	0	0	0	0
Purb	1	3	0	7	0	6
Gm14403	0	0	0	0	0	0
Gm2007	0	0	0	0	0	0
Gm14431	0	0	0	0	0	0
Hist1h2bn	0	2	0	1	0	0
Gm14325	0	0	0	0	0	0
Gm4245	0	0	0	0	0	0
Gm2004	0	0	0	0	0	0
Gm2163	0	0	0	0	0	0
Hist1h2bm	0	5	0	3	0	0

## Sheet: nonDEGs_inQTL
gene_id	enhancers_50Kb	promoters	fUTRs	exons	introns	tUTRs
Pih1d2	0	19	16	29	84	4
Vsig2	0	0	0	0	1	0
Spa17	0	1	0	0	0	0
Sf3a1	0	8	0	9	47	5
Prkra	0	0	0	0	1	0
Plekha3	0	0	0	0	1	0
Qtrt1	0	0	0	0	0	0
Stard3nl	0	0	0	0	74	0
Nob1	0	0	0	0	1	0
Nqo1	0	0	0	0	0	0
Rab23	0	8	0	15	37	11
Ccdc159	0	0	0	0	0	0
Tek	1	0	0	0	14	0
Zdhhc24	0	0	0	0	0	0
Bbs1	0	0	0	1	1	1
Elavl2	1	1	0	0	13	0
Ewsr1	0	12	0	9	76	4
Stx5a	0	0	0	0	0	0
Fads1	0	0	0	0	0	0
Enkd1	0	0	0	0	0	0
Atp6v0d1	0	0	0	0	0	0
Cmc2	0	0	0	0	2	0
E2f4	0	0	0	0	0	0
Gorasp2	0	0	0	0	4	0
Ddx19a	0	0	0	0	0	0
Rab3d	0	0	0	0	0	0
Cdc37	5	2	0	1	24	1
Egfr	0	0	0	36	53	35
Upp1	1	0	0	0	1	0
Hus1	12	7	0	8	12	2
Rnf185	0	0	0	0	14	0
Polm	9	17	2	7	20	1
Gtpbp4	0	0	0	0	0	0
Sfi1	0	5	0	3	39	0
Asrgl1	0	0	0	0	1	0
Tmem138	0	0	0	1	3	1
Sdhaf2	0	1	0	19	90	18
Gna14	0	0	0	0	394	0
Naa40	0	0	0	0	0	0
Snx15	0	0	0	0	4	0
Sac3d1	0	0	0	0	0	0
Cdca5	0	2	0	0	5	0
Aip	0	4	0	1	8	0
Rin1	2	1	0	0	0	0
Ppp6r3	16	4	0	4	199	2
Fibp	0	0	0	0	1	0
Fermt3	0	0	0	0	1	0
1110058L19Rik	0	6	1	11	100	2
Xrcc5	0	0	0	0	2	0
Farsb	0	0	0	0	6	0
Cybrd1	13	18	6	44	278	31
Lrp2	45	12	0	28	1041	3
Ola1	0	0	0	0	2	0
Snx5	3	57	0	36	168	13
Csrp2bp	37	59	5	22	377	6
Phactr3	0	0	0	0	10	0
Slc35a1	0	0	0	0	0	0
Zfp37	0	0	0	0	2	0
Pole3	0	0	0	0	0	0
Aco1	0	0	0	0	9	0
Aptx	0	0	0	3	6	3
Chmp5	0	0	1	2	2	1
Nfx1	0	4	0	0	7	0
Nol6	0	1	0	0	1	0
Dcaf12	0	0	0	1	2	0
Ubap1	0	0	0	1	13	1
Atp8b5	0	0	0	76	1491	73
Gba2	0	17	1	16	35	0
Ist1	0	0	0	0	1	0
Cenpn	0	0	0	0	0	0
Klhl36	0	0	0	0	1	0
Mphosph6	0	0	0	0	8	0
Cbfb	0	0	0	0	2	0
Tradd	0	0	0	0	1	0
D230025D16Rik	0	0	0	0	1	0
Cyb5b	0	0	0	1	9	1
Adat1	0	0	0	0	0	0
Tmem231	0	0	0	0	1	0
Tmem170	0	0	0	0	0	0
Grik4	47	2	0	3	1588	1
Rexo2	0	5	0	1	49	1
Nxpe2	0	0	0	5	16	0
Tirap	0	0	0	0	0	0
Il10ra	10	10	2	17	105	12
Arcn1	4	14	3	33	158	17
Dpagt1	0	21	2	9	64	4
Anp32a	3	2	0	0	16	0
Glce	6	2	0	5	41	2
Lactb	0	1	0	2	34	1
Trip4	0	1	0	1	39	1
Spg21	1	1	0	0	9	0
Parp16	1	0	0	0	5	0
Zwilch	0	35	1	14	265	3
2300009A05Rik	0	1	0	0	1	0
Acsl3	0	7	0	0	7	0
Inha	0	2	0	1	7	0
Rfwd3	0	0	0	0	0	0
Ddx19b	0	0	0	0	1	0
Asb13	0	9	1	8	71	3
Gas2l1	3	5	1	11	18	3
Dak	0	0	0	1	1	0
Cyb561a3	0	1	0	0	3	0
Uaca	84	0	0	20	336	0
Inpp5j	0	0	0	0	1	0
Cpsf7	0	0	0	0	7	0
Larp6	0	0	0	0	2	0
Kri1	0	0	0	0	0	0
1110059E24Rik	3	14	0	3	166	1
Tdrd7	3	4	0	2	79	0
Dcaf10	0	0	0	0	5	0
Trmt10b	1	0	0	0	4	0
Dnajb5	58	1	0	40	39	36
9530077C05Rik	18	8	0	4	240	2
Unc93b1	6	14	0	9	94	2
Tbcel	0	4	0	0	4	0
AW551984	0	1	0	0	4	0
Cdon	0	0	0	1	6	1
Ptpn3	1	0	0	0	9	0
Dido1	0	0	0	0	1	0
Osbpl2	0	0	0	0	2	0
Ss18l1	0	0	0	0	1	0
Zdhhc1	0	0	0	0	2	0
Il18	0	2	0	3	40	2
Smarcal1	0	0	0	0	0	0
Mreg	1	1	0	0	10	0
Ddx58	0	3	0	0	8	0
Necab1	0	31	4	26	469	20
Oaz2	1	0	0	0	5	0
1110037F02Rik	0	0	0	0	2	0
Pif1	0	0	0	0	1	0
H2afv	0	1	0	18	50	17
Osgin2	0	2	0	1	6	0
Cirh1a	0	0	0	0	1	0
Cep78	0	0	0	0	10	0
Rasl12	0	0	0	1	5	1
Pgm5	131	10	0	7	1224	2
Gpr155	0	0	0	0	0	0
Pdcd7	0	0	0	0	1	0
Mettl8	117	54	2	66	1126	42
Myo3b	2	2	0	4	1160	0
Exoc3l	0	0	0	0	0	0
Tmem64	13	0	0	0	3	0
Ccdc141	2	0	0	1	8	0
Cnrip1	0	9	4	35	453	5
Akr1e1	0	4	0	6	41	5
Zfp560	0	2	0	1	16	1
Rab2a	0	1	0	0	13	0
Dusp18	0	1	0	2	0	2
Atmin	0	0	0	0	1	0
Trpt1	0	0	0	0	0	0
Pdp2	0	0	0	0	0	0
1810026J23Rik	0	0	0	0	0	0
Heatr1	0	6	0	11	188	0
Ndufaf6	0	0	0	0	3	0
Ccdc79	0	0	0	0	0	0
Jun	0	0	0	0	0	0
Arhgap20	0	0	0	0	5	0
Tusc1	0	0	0	0	0	0
Gm9938	0	0	1	2	0	1
Fut9	0	1	0	0	10	0
Maf	0	1	1	1	1	0
Zfp1	0	0	0	0	1	0
Triqk	0	0	0	0	15	0
Snx32	0	0	0	0	1	0
Cfl1	0	0	0	0	0	0
Slc44a2	0	0	0	0	0	0
Mtfmt	0	1	0	1	3	1
Fxn	8	48	1	19	73	0
Rufy4	0	3	1	7	81	4
Ei24	0	0	0	0	2	0
Mtap	1	0	0	0	3	0
Bbs5	8	0	0	0	4	0
Slc24a3	78	54	1	16	5365	5
Fkbp15	0	0	0	1	1	0
Zfp810	0	0	0	0	0	0
Atxn1l	0	0	0	0	0	0
Mpzl3	0	17	1	70	200	29
Fam217b	0	0	0	0	0	0
Akr1c19	0	9	0	1	43	0
Fam189a2	12	0	0	12	138	4
Ganab	0	0	0	0	0	0
Ttc9c	0	0	0	0	0	0
Polr2g	0	0	0	0	0	0
Gm960	5	5	1	10	182	7
Pate2	0	0	0	0	2	0
Rad54b	0	0	0	0	2	0
Fdx1l	0	0	0	0	0	0
Edaradd	2	6	3	9	183	5
