# Supplementary material for: Quantitative trait and transcriptome analysis of genetic complexity underpinning cardiac interatrial septation in mice using an advanced intercross line
Source: eLife. 2023 Jun 5;12:e83606. doi: 10.7554/eLife.83606 (PMC10284603; doi:10.7554/eLife.83606)
Supplement: Supplementary file 9. [file elife-83606-supp9.xlsx]

## Sheet: 0
Supplementary File 10. Effect of various covariates on FVL.
Source	Type III Sum of Squares	df	Mean Square	F	P-value
Sex	0.315	1	0.315	1.177	0.278
Age	0.507	1	0.507	1.893	0.169
BW	0.125	1	0.125	0.467	0.495
HW	2.467	1	2.467	9.219	0.002
Colour	0.001	1	0.001	0.003	0.956
