# Supplementary material for: Quantitative trait and transcriptome analysis of genetic complexity underpinning cardiac interatrial septation in mice using an advanced intercross line
Source: eLife. 2023 Jun 5;12:e83606. doi: 10.7554/eLife.83606 (PMC10284603; doi:10.7554/eLife.83606)
Supplement: Supplementary file 10. [file elife-83606-supp10.xlsx]

## Sheet: 0
Supplementary File 11. Effect of various covariates on FOW.
Source	Type III Sum of Squares	df	Mean Square	F	P-value
Sex	0.03	1	0.03	0.5	0.48
Age	0.056	1	0.056	0.929	0.335
BW	0.17	1	0.17	2.797	0.095
HW	0.293	1	0.293	4.82	0.028
Colour	0.016	1	0.016	0.264	0.608
