# Supplementary material for: Quantitative trait and transcriptome analysis of genetic complexity underpinning cardiac interatrial septation in mice using an advanced intercross line
Source: eLife. 2023 Jun 5;12:e83606. doi: 10.7554/eLife.83606 (PMC10284603; doi:10.7554/eLife.83606)
Supplement: Supplementary file 11. [file elife-83606-supp11.xlsx]

## Sheet: 0
Supplementary File 12. Effect of various covariates on CRW.
Source	Type III Sum of Squares	df	Mean Square	F	P-value
Sex	0.345	1	0.345	1.492	0.222
Age	0.315	1	0.315	1.366	0.243
BW	0.372	1	0.372	1.613	0.204
HW	0.601	1	0.601	2.604	0.107
Colour	1.32	1	1.32	5.713	0.017
