# Supplementary material for: Quantitative trait and transcriptome analysis of genetic complexity underpinning cardiac interatrial septation in mice using an advanced intercross line
Source: eLife. 2023 Jun 5;12:e83606. doi: 10.7554/eLife.83606 (PMC10284603; doi:10.7554/eLife.83606)
Supplement: Supplementary file 12. [file elife-83606-supp12.xlsx]

## Sheet: 0
Supplementary File 13. Effect of various covariates on HW.
Source	Type III Sum of Squares	df	Mean Square	F	P-value
Sex	0.083	1	0.083	228.508	0
Age	0.002	1	0.002	4.621	0.032
BW	0.131	1	0.131	359.744	0
Colour	0.002	1	0.002	4.15	0.042
