# Supplementary material for: Quantitative trait and transcriptome analysis of genetic complexity underpinning cardiac interatrial septation in mice using an advanced intercross line
Source: eLife. 2023 Jun 5;12:e83606. doi: 10.7554/eLife.83606 (PMC10284603; doi:10.7554/eLife.83606)
Supplement: Supplementary file 13. [file elife-83606-supp13.xlsx]

## Sheet: 0
Supplementary File 14. Effect of various covariates on PFO.
Source	Type III Sum of Squares	df	Mean Square	F	P-value
Sex	0.042	1	0.042	0.189	0.664
Age	0.096	1	0.096	0.429	0.512
BW	0.154	1	0.154	0.686	0.408
HW	0.069	1	0.069	0.306	0.581
Colour	0.033	1	0.033	0.149	0.7
