# Supplementary material for: Quantitative trait and transcriptome analysis of genetic complexity underpinning cardiac interatrial septation in mice using an advanced intercross line
Source: eLife. 2023 Jun 5;12:e83606. doi: 10.7554/eLife.83606 (PMC10284603; doi:10.7554/eLife.83606)
Supplement: Supplementary file 14. [file elife-83606-supp14.xlsx]

## Sheet: 0
Supplementary File 15. List of markers with physical and genetic location.
No.	Chr.	SNP ID	Physical Position	Genetic Position
1	1	rs32517458	17878362	5.4549
2	1	rs31445960	21704030	7.704
3	1	rs13475769	24958696	10.308
4	1	rs30641794	30026645	11.3472
5	1	rs13475802	34647581	13.337
6	1	rs31052524	37358323	15.457
7	1	rs32480633	39640998	18.3493
8	1	rs31075310	42578158	20.7457
9	1	rs30805456	44439262	23.626
10	1	rs30917196	47228346	25.5443
11	1	rs31991963	52065230	26.6713
12	1	rs32480972	59237136	29.333
13	1	rs32055290	63762906	32.307
14	1	rs31604370	68192834	33.9014
15	1	rs32666041	73462407	37.996
16	1	rs31218676	77148626	39.511
17	1	rs30203203	80790247	41.6201
18	1	rs6278395	88645127	43.9953
19	1	rs30315626	92265367	45.4767
20	1	rs31438438	98284433	47.764
21	1	rs31883728	103053044	49.258
22	1	rs6212740	108915586	50.344
23	1	rs31959300	117673197	51.606
24	1	rs31735078	124410502	53.1661
25	1	rs32648932	129563187	55.798
26	1	rs32434650	135869536	58.0582
27	1	rs32424507	139650241	60.524
28	1	rs3663996	143991782	62.3284
29	1	rs6405822	149908841	63.32
30	1	rs30467058	154157774	64.7135
31	2	rs27208240	31043128	21.806
32	2	rs27168898	34880155	23.2912
33	2	rs6171091	42409494	25.237
34	2	rs28320922	47148532	27.8716
35	2	rs28295341	50718471	29.2835
36	2	rs29521586	58052086	33.053
37	2	rs13476542	64093315	37.6423
38	2	rs3695852	67387900	39.315
39	2	rs51010451	72078052	43.026
40	2	rs33005712	77153358	45.937
41	2	rs33146952	80508862	48.3881
42	2	rs27369074	92294227	51.0509
43	2	rs6403952	95681285	52.156
44	2	rs27393348	102153636	54.129
45	2	rs33217144	107389917	56.116
46	2	rs27488478	113024169	57.2433
47	2	rs29971528	117981438	59.3588
48	2	rs32992654	126302207	61.759
49	2	rs27276631	132008491	64.146
50	2	rs13476787	134965497	66.437
51	2	rs33119174	140093642	69.202
52	2	rs29733168	148699444	73.5983
53	2	rs27369770	152240355	74.9854
54	2	rs27338655	155621679	77.262
55	2	rs27304445	158395675	78.715
56	2	rs27316600	162874767	83.9978
57	2	rs33353350	165595453	85.9611
58	2	rs29821300	168185567	88.7165
59	2	rs27620443	172534415	94.899
60	2	rs27650386	174060877	97.874
61	2	rs29723406	178724740	100.774
62	4	rs27658776	8919600	3.9091
63	4	rs3712771	13922293	6.0006
64	4	rs27682682	19548000	7.559
65	4	rs3671060	29186287	12.9927
66	4	rs27773647	33403738	14.7883
67	4	rs32922690	35631610	17.7134
68	4	rs27766395	37917978	19.8859
69	4	rs13459075	41664425	21.9875
70	4	rs3661213	45208833	23.7715
71	4	rs3699346	48577080	26.133
72	4	rs32666861	52347280	28.314
73	4	rs27805117	55773652	30.4993
74	4	rs27866811	58985174	32.361
75	4	rs27922877	64514168	34.056
76	4	rs32458346	71213322	36.0325
77	4	rs32917213	75830206	37.323
78	4	rs28090194	82225610	39.2684
79	4	rs28099501	86919147	41.044
80	4	rs28106777	95477384	44.0403
81	4	rs32870027	100191865	45.74
82	8	rs32591452	103180549	50.074
83	8	rs13479958	105453023	52.796
84	8	rs13479995	116236688	59.651
85	8	rs3691294	117662932	62.158
86	8	rs3686697	119689334	63.7249
87	8	rs6244767	120831047	65.9844
88	9	rs31494115	4435626	2.458
89	9	rs30194650	16513299	5.3342
90	9	rs29594239	20932553	7.7191
91	9	rs6324426	26722424	11.8784
92	9	rs6352237	28364090	14.3502
93	9	rs6331932	32220062	17.7274
94	9	rs3666782	36894028	20.721
95	9	rs30079126	42017004	23.575
96	9	rs30331033	45242187	24.836
97	9	rs30087720	48368569	26.4443
98	9	rs30524405	56052626	30.13
99	9	rs30471967	59939036	32.5174
100	9	rs30273450	63600100	34.2822
101	9	rs29990501	67283279	36.5258
102	9	rs30084038	70100757	39.4643
103	11	rs26897275	3686755	2.6629
104	11	rs29385812	7963924	4.884
105	11	rs6185261	11911737	7.1966
106	11	rs29408224	14842944	8.623
107	11	rs33850802	18943579	11.4064
108	11	rs29465407	22114857	14.1312
109	11	rs6259125	28060339	16.2052
110	11	rs26839036	31432399	18.4862
111	11	rs26888494	34940140	20.3055
112	13	rs29552398	12612567	4.9149
113	13	rs623307	17509991	5.9688
114	13	rs29250410	20698662	7.3978
115	13	rs6310463	29209975	12.9129
116	13	rs29252384	34405346	14.0842
117	13	rs29637575	37665745	16.9315
118	13	rs29239048	39581608	19.0463
119	13	rs29222774	43048849	21.2576
120	13	rs29534013	45966066	22.8181
121	13	rs29244575	47908419	24.497
122	13	rs29250103	52156808	26.669
123	13	rs29686818	54788137	28.9658
124	13	rs30079865	57767165	30.6219
125	13	rs29831449	62928598	32.744
126	13	rs29245956	70857323	35.97
127	13	rs29885133	77353251	40.977
128	19	rs31292888	3356365	3.115
129	19	rs52111888	6358321	4.473
130	19	rs31091380	10728651	7.0149
131	19	rs30617509	14647451	9.184
132	19	rs30690659	16465896	11.2293
133	19	rs31195994	18586641	13.167
134	19	rs30653264	21574326	14.5949
135	19	rs30323643	22618957	17.0007
136	19	rs30464413	24535024	19.518
137	19	rs31057067	26041377	20.8274
138	19	rs31090270	27236333	21.7132
139	19	rs30518862	28327321	22.8775
140	19	rs3680681	30074291	24.6699
141	19	rs3713134	32068420	26.584
142	19	rs31233231	33025504	29.056
143	19	rs30997146	35142532	29.792
144	19	rs31262554	37174506	32.1327
145	19	rs31045283	47110119	39.1172
146	19	rs30696058	47983028	40.527
147	19	rs3677606	50367797	45.048
148	19	rs6167751	52006078	46.061
149	19	rs30903784	53224126	47.1984
150	19	rs30363136	55847579	51.6054
