# Supplementary figures and images for: Quantitative trait and transcriptome analysis of genetic complexity underpinning cardiac interatrial septation in mice using an advanced intercross line
Source: eLife journal article supplement (doi:10.7554/elife.83606), 2023-06-05

Ubiquitin input blot

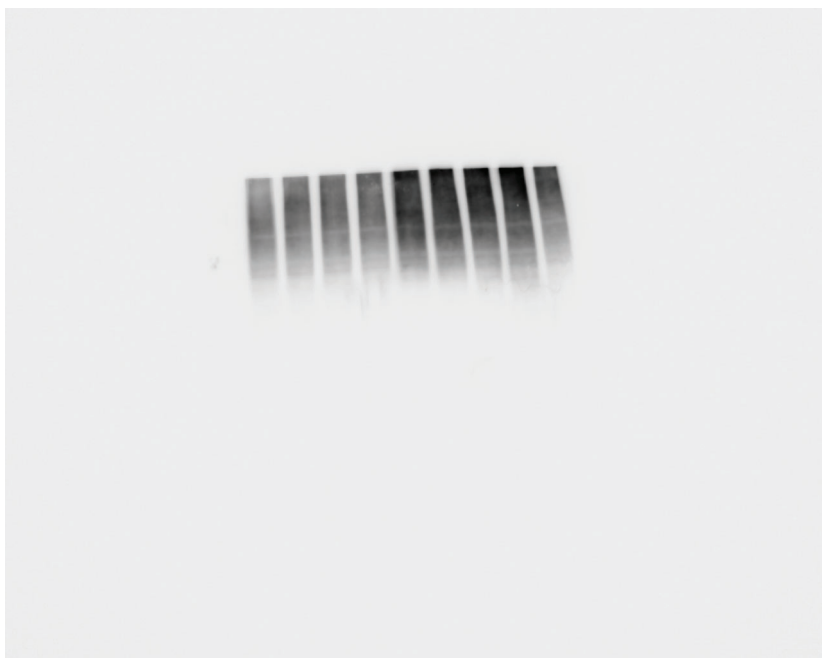

FLAG input blot

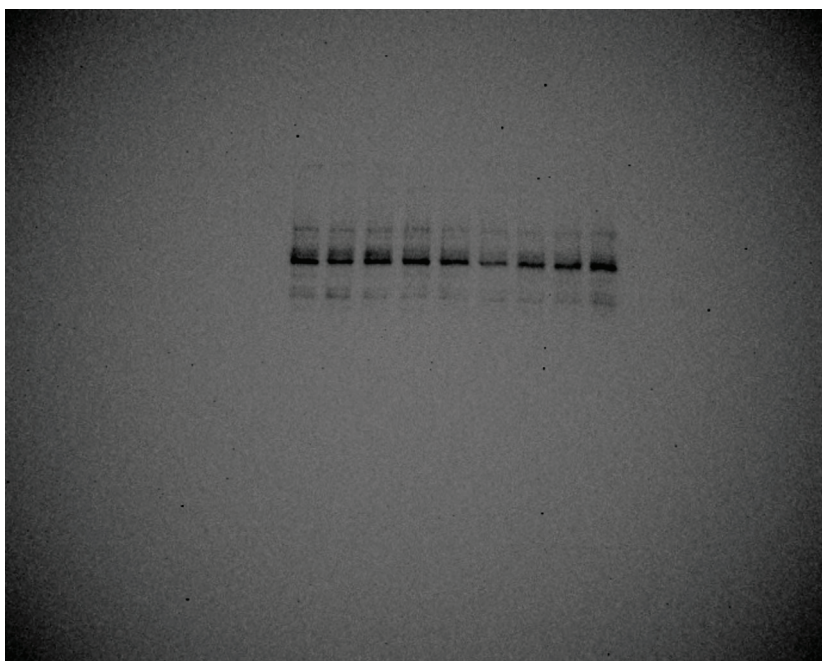

Total protein input gel

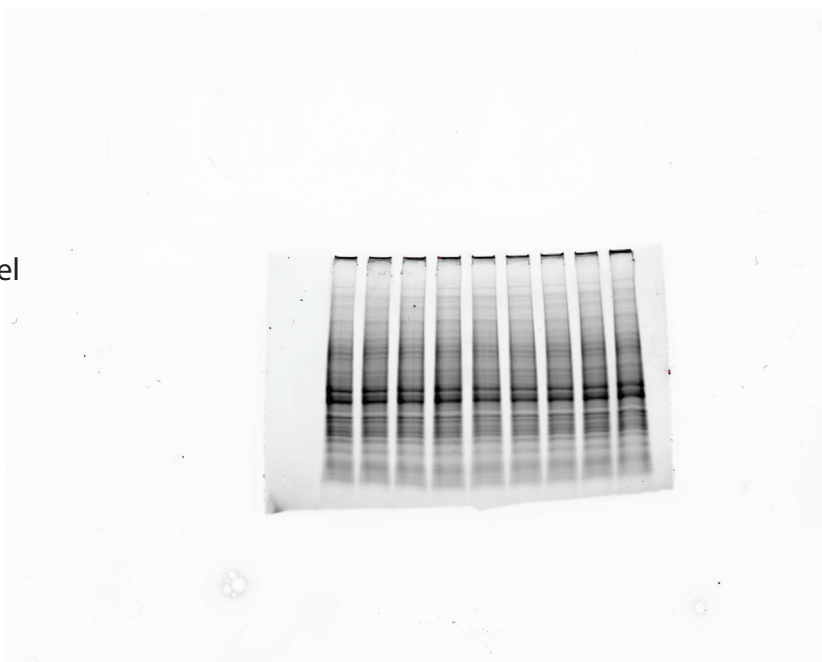

Supplement: fig7-data1 [file elife-83606-fig7-data1-v2.zip]

Short exposure

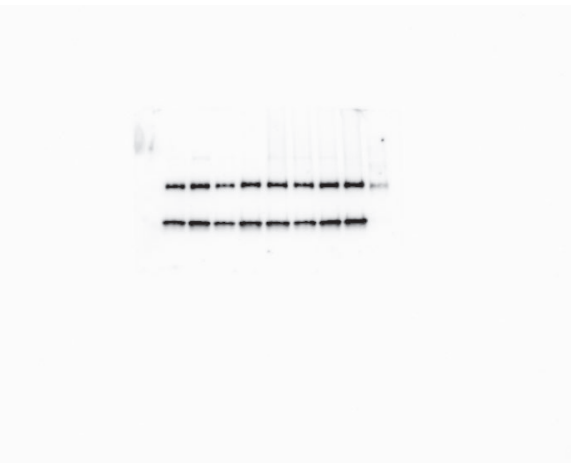

IP blot 1

Long exposure

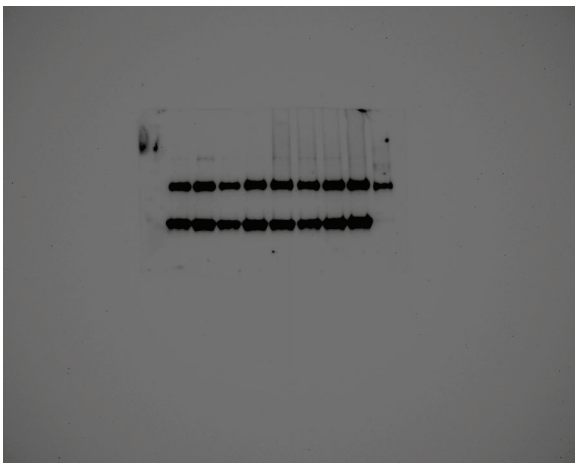

IP blot 2

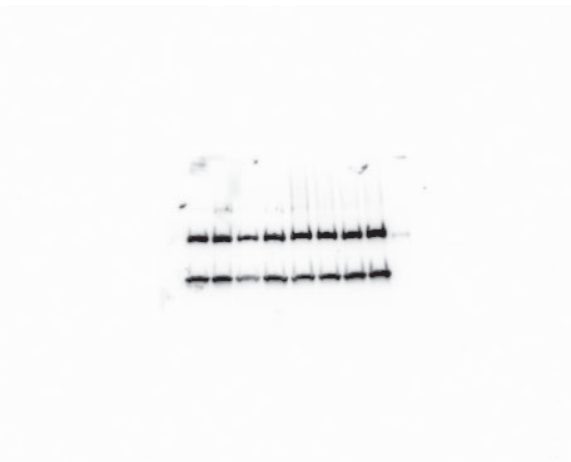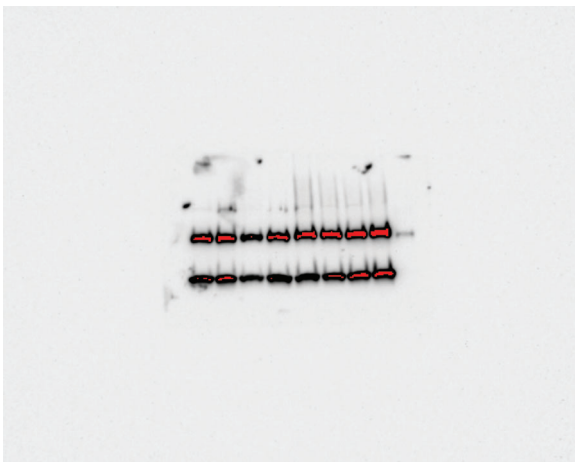

IP blot 3

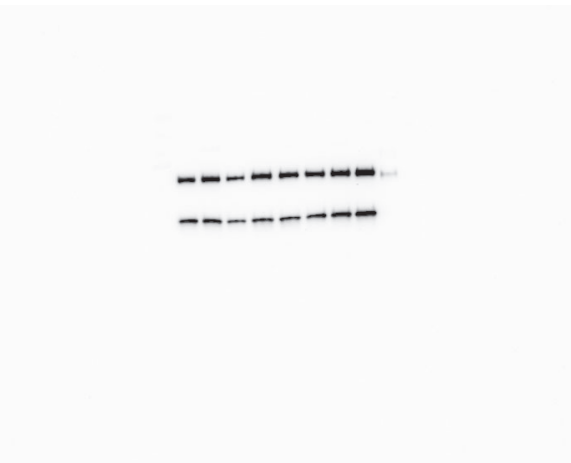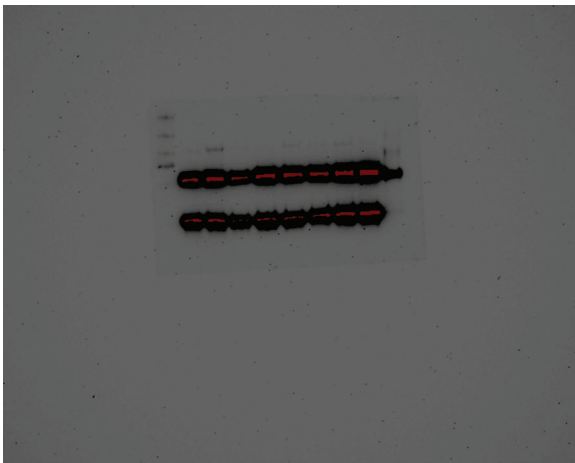

Supplement: fig7-data1 [file elife-83606-fig7-data1-v2.zip]
